# Supplementary material
Source: PubMed Central journal article supplement (PMC6889887)

## SUPPORTING INFORMATION

### Directed, Palladium(II)-Catalyzed Enantioselective *anti*-Carboboration of Alkenyl Carbonyl Compounds

Zhen Liu, Xiaohan Li, Tian Zeng, Keary M. Engle\*

\*keary@scripps.edu

*Department of Chemistry, The Scripps Research Institute, 10550 North Torrey Pines Road, La Jolla, California 92037, United States*

#### Table of Contents

|                                                                                      |      |
|--------------------------------------------------------------------------------------|------|
| General Information.....                                                             | S-2  |
| Experimental Procedures.....                                                         | S-2  |
| Chiral Ligand Synthesis.....                                                         | S-2  |
| Alkene Substrate Synthesis.....                                                      | S-9  |
| Indole Nucleophile Synthesis.....                                                    | S-12 |
| Reaction Optimization Details.....                                                   | S-13 |
| General Procedure for Asymmetric Alkene Carboboration.....                           | S-14 |
| Unsuccessful Non-Indole Carbon Nucleophiles.....                                     | S-20 |
| Large-Scale Synthesis and Recrystallization.....                                     | S-21 |
| Procedures for Transformations of Borylated Products.....                            | S-22 |
| Determination of Absolute Stereochemistry of <b>4a</b> by Mosher Ester Analysis..... | S-25 |
| Mechanistic Studies of Alkene <i>E/Z</i> Isomerization.....                          | S-26 |
| X-Ray Crystallography.....                                                           | S-29 |
| References.....                                                                      | S-48 |
| NMR Spectra and SFC Chromatograms.....                                               | S-50 |

## GENERAL INFORMATION

Unless otherwise noted, all materials were used as received from commercial sources without further purification. All commercial carbon nucleophiles, boron reagents, ligands and solvents were purchased from Aldrich, Alfa Aesar, Oakwood, and Combi-Blocks. Pd(OAc)<sub>2</sub> was obtained from Johnson Matthey. NMR spectra were recorded on Bruker AV-400, DRX-500 and AV-600 instruments. <sup>1</sup>H and <sup>13</sup>C spectra were internally referenced to SiMe<sub>4</sub> or solvent signals. The following abbreviations (or combinations thereof) were used to explain multiplicities: s = singlet, d = doublet, t = triplet, q = quartet, p = pentet, sept = septet, m = multiplet. High-resolution mass spectra (HRMS) for new compounds were recorded on a Waters LC-TOF mass spectrometer, and the reported masses were automatically calibrated to be the neutral adduct of [M+H] by adding the mass of an electron. Enantiomeric ratios (*er*) were determined on a Waters UPC<sup>2</sup> system using commercially available chiral columns.

## EXPERIMENTAL PROCEDURES

### Chiral Ligand Synthesis

**Table S1.** Chiral ligands **L6–11**, **L15–23**, **L27–28**, **L30** and **L34**.

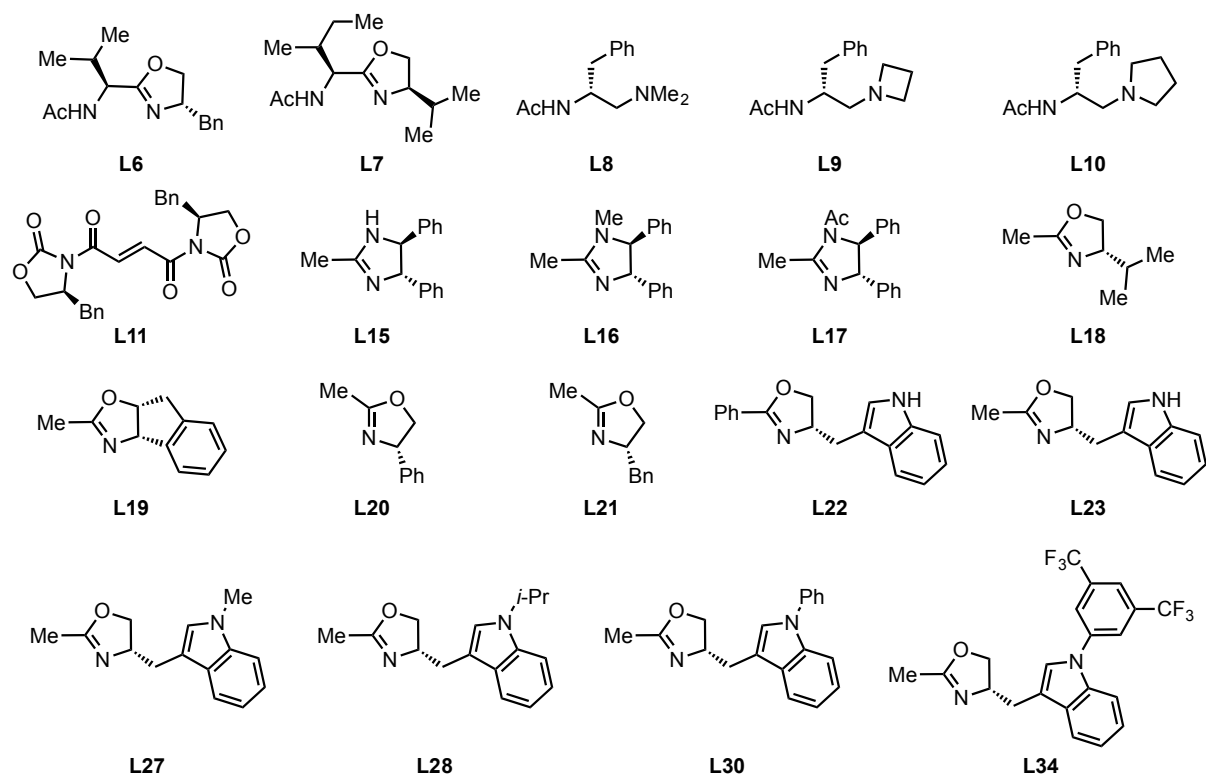

Chiral ligands **L6–11**,<sup>1–3</sup> **L15–23**,<sup>4–7</sup> **L27–28**,<sup>7</sup> **L30**<sup>7</sup> and **L34**<sup>7</sup> were prepared according to literature procedures.

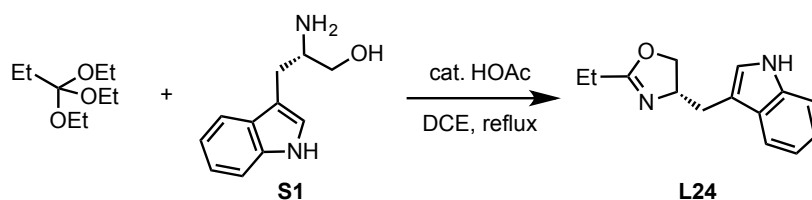

**Scheme S1:** Synthesis of (*S*)-4-((1*H*-indol-3-yl)methyl)-2-ethyl-4,5-dihydrooxazole (**L24**).<sup>7</sup>

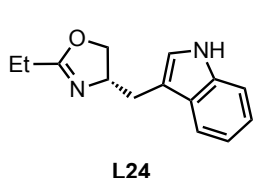

**L24**

**(*S*)-4-((1*H*-indol-3-yl)methyl)-2-ethyl-4,5-dihydrooxazole (**L24**):** The title compound was prepared from **S1** (475 mg, 2.5 mmol) and triethyl orthopropionate (529 mg, 3 mmol) according to a literature procedure.<sup>7</sup> Purification using silica gel column chromatography with 1:1.5 hexanes:EtOAc as the eluent gave the product as a light-yellow solid (457 mg, 80% yield). <sup>1</sup>H NMR (600 MHz, CDCl<sub>3</sub>) δ 8.19 (s, 1H), 7.64 (dt, *J* = 7.9, 0.9 Hz, 1H), 7.35 (dp, *J* = 8.2, 0.9 Hz, 1H), 7.20 (ddt, *J* = 8.0, 7.0, 0.9 Hz, 1H), 7.15–7.09 (m, 1H), 7.02 (dt, *J* = 4.4, 1.9 Hz, 1H), 4.55–4.45 (m, 1H), 4.16 (ddd, *J* = 9.3, 8.4, 0.9 Hz, 1H), 3.98 (ddd, *J* = 8.3, 7.2, 1.0 Hz, 1H), 3.26 (ddt, *J* = 14.5, 4.8, 0.8 Hz, 1H), 2.79 (ddt, *J* = 14.5, 8.8, 0.9 Hz, 1H), 2.32–2.25 (m, 2H), 1.19 (t, *J* = 7.6 Hz, 3H); <sup>13</sup>C NMR (150 MHz, CDCl<sub>3</sub>) δ 169.0, 136.3, 127.6, 122.2, 122.0, 119.4, 118.9, 112.2, 111.1, 72.0, 66.3, 31.4, 21.5, 10.4; HRMS (ESI-TOF) Calcd for C<sub>14</sub>H<sub>17</sub>N<sub>2</sub>O [M+H] 229.1341, found 229.1336.

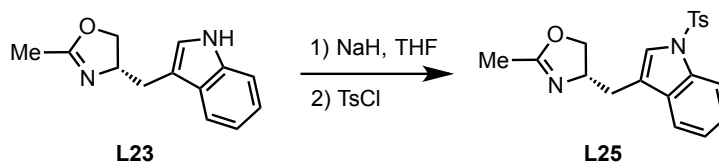

**L23**

**L25**

**Scheme S2:** Synthesis of (*S*)-2-methyl-4-((1-tosyl-1*H*-indol-3-yl)methyl)-4,5-dihydrooxazole (**L25**).<sup>8</sup>

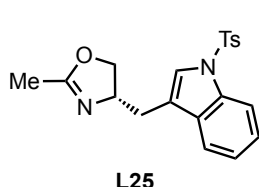

**L25**

**(*S*)-2-methyl-4-((1-tosyl-1*H*-indol-3-yl)methyl)-4,5-dihydrooxazole (**L25**):** The title compound was prepared from **L23** (107 mg, 0.5 mmol) and tosyl chloride (105 mg, 0.55 mmol) according to a literature procedure.<sup>8</sup> Purification using silica gel column chromatography with 1:1 hexanes:EtOAc as the eluent gave the product as a colorless oil (184 mg, 78% yield). <sup>1</sup>H NMR (600 MHz, CDCl<sub>3</sub>) δ 7.99 (d, *J* = 8.3 Hz, 1H), 7.76 (d, *J* = 8.4 Hz, 2H), 7.54 (dt, *J* = 7.8, 0.9 Hz, 1H), 7.40 (d, *J* = 1.1 Hz, 1H), 7.34 (ddd, *J* = 8.3, 7.2, 1.2 Hz, 1H), 7.28–7.21 (m, 3H), 4.45 (dddd, *J* = 9.7, 8.5, 7.2, 5.0, 1.3 Hz, 1H), 4.19 (dd, *J* = 9.4, 8.6 Hz, 1H), 3.91 (dd, *J* = 8.5, 7.2 Hz, 1H), 3.12 (ddd, *J* = 14.8, 4.9, 1.2 Hz, 1H), 2.75 (ddd, *J* = 14.8, 8.6, 0.8 Hz, 1H), 2.36 (s, 3H), 1.97 (d, *J* = 1.2 Hz, 3H); <sup>13</sup>C NMR (150 MHz, CDCl<sub>3</sub>) δ 165.3, 144.8, 135.2, 135.2, 130.9, 129.8, 126.7, 124.8, 123.6, 123.1, 119.5, 118.9, 113.7, 71.9, 65.6, 31.0, 21.5, 13.9; HRMS (ESI-TOF) Calcd for C<sub>20</sub>H<sub>21</sub>N<sub>2</sub>O<sub>3</sub>S [M+H] 369.1273, found 369.1276.

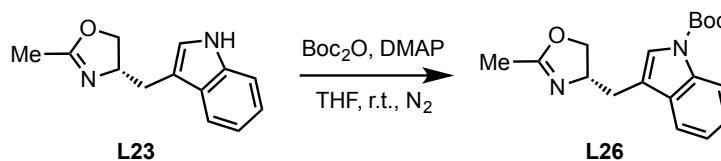

**L23**

**L26**

**Scheme S3:** Synthesis of *tert*-butyl (*S*)-3-((2-methyl-4,5-dihydrooxazol-4-yl)methyl)-1*H*-indole-1-carboxylate (**L26**).<sup>9</sup>

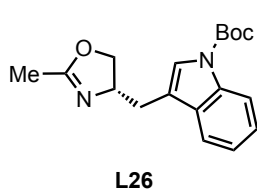

**tert-butyl (S)-3-((2-methyl-4,5-dihydrooxazol-4-yl)methyl)-1H-indole-1-carboxylate (L26):** The title compound was prepared from **L23** (107 mg, 0.5 mmol) and Boc<sub>2</sub>O (218 mg, 1 mmol) according to a literature procedure.<sup>9</sup> Purification using silica gel column chromatography with 1:1 hexanes:EtOAc as the eluent gave the product as a colorless oil (157 mg, 99% yield). <sup>1</sup>H NMR (600 MHz, CDCl<sub>3</sub>) δ 8.11 (s, 1H), 7.55 (dt, *J* = 7.8, 1.0 Hz, 1H), 7.41 (s, 1H), 7.31 (ddd, *J* = 8.4, 7.2, 1.3 Hz, 1H), 7.26–7.19 (m, 1H), 4.48 (dddd, *J* = 9.7, 8.5, 7.0, 6.1, 1.3 Hz, 1H), 4.23 (dd, *J* = 9.4, 8.5 Hz, 1H), 3.97 (dd, *J* = 8.5, 7.2 Hz, 1H), 3.12 (ddd, *J* = 14.8, 5.2, 1.2 Hz, 1H), 2.74 (ddd, *J* = 14.7, 8.5, 0.9 Hz, 1H), 1.98 (d, *J* = 1.3 Hz, 3H), 1.67 (s, 9H); <sup>13</sup>C NMR (150 MHz, CDCl<sub>3</sub>) δ 165.2, 149.7, 135.5, 130.6, 124.4, 123.3, 122.4, 119.0, 116.8, 115.2, 83.5, 72.2, 65.8, 31.2, 28.2, 13.9; HRMS (ESI-TOF) Calcd for C<sub>18</sub>H<sub>23</sub>N<sub>2</sub>O<sub>3</sub> [M+H] 315.1709, found 315.1711.

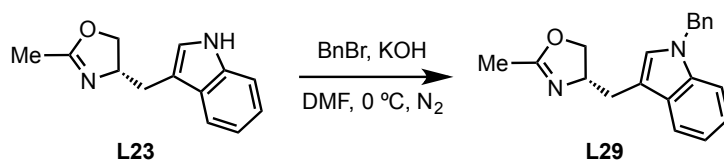

**Scheme S4:** Synthesis of (S)-4-((1-benzyl-1H-indol-3-yl)methyl)-2-methyl-4,5-dihydrooxazole (**L29**).<sup>10</sup>

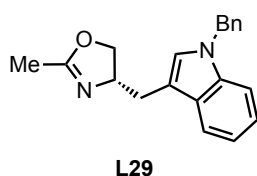

**(S)-4-((1-benzyl-1H-indol-3-yl)methyl)-2-methyl-4,5-dihydrooxazole (L29):** The title compound was prepared from **L23** (214 mg, 1 mmol) and BnBr (256 mg, 1.5 mmol) according to a literature procedure.<sup>10</sup> Purification using silica gel column chromatography with 2:1 hexanes:EtOAc as the eluent gave the product as a colorless oil (234 mg, 77% yield). <sup>1</sup>H NMR (600 MHz, CDCl<sub>3</sub>) δ 7.67–7.62 (m, 1H), 7.32–7.26 (m, 4H), 7.19 (tt, *J* = 8.0, 0.9 Hz, 1H), 7.15–7.06 (m, 3H), 6.97 (s, 1H), 5.29 (d, *J* = 2.4 Hz, 2H), 4.53–4.44 (m, 1H), 4.17 (dd, *J* = 9.3, 8.5 Hz, 1H), 4.01–3.92 (m, 1H), 3.35–3.16 (m, 1H), 2.80 (dd, *J* = 14.6, 8.6 Hz, 1H), 1.96 (t, *J* = 0.9 Hz, 3H); <sup>13</sup>C NMR (150 MHz, CDCl<sub>3</sub>) δ 164.89, 137.6, 136.6, 128.7, 128.3, 127.6, 126.7, 126.3, 121.8, 119.1, 119.0, 111.3, 109.7, 72.2, 66.6, 49.9, 31.2, 13.9; HRMS (ESI-TOF) Calcd for C<sub>20</sub>H<sub>21</sub>N<sub>2</sub>O [M+H] 305.1654, found 305.1653.

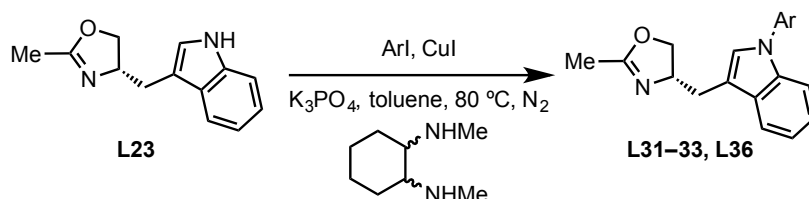

**Scheme S5:** Synthesis of **L31–33** and **L36**.<sup>7</sup>

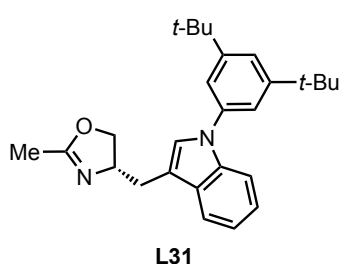

**(S)-4-((1-(3,5-di-tert-butylphenyl)-1H-indol-3-yl)methyl)-2-methyl-4,5-dihydrooxazole (L31):** The title compound was prepared from **L23** (107 mg, 0.5 mmol) and 1,3-di-tert-butyl-5-iodobenzene<sup>11</sup> (237 mg, 1.5 mmol) according to a literature procedure.<sup>7</sup> Purification using silica gel column chromatography with 3:1 hexanes:EtOAc as the eluent gave the product as a colorless oil (151 mg, 75% yield). <sup>1</sup>H NMR (600 MHz, CDCl<sub>3</sub>) δ 7.71 (dt, *J* = 7.9, 0.9 Hz, 1H), 7.55 (dt, *J* = 8.2, 0.9 Hz, 1H), 7.43 (t, *J* = 1.8 Hz, 1H), 7.33 (d, *J* = 1.8 Hz, 2H), 7.27–7.23 (m, 2H), 7.20 (ddd, *J* = 8.0, 7.0, 1.0 Hz, 1H), 4.62–4.52 (m, 1H), 4.26 (dd, *J* = 9.3, 8.5 Hz, 1H), 4.07 (dd, *J* = 8.4, 7.3 Hz, 1H),

3.33 (ddd,  $J = 14.6, 4.9, 1.0$  Hz, 1H), 2.87 (dd,  $J = 14.6, 8.9$  Hz, 1H), 2.03 (d,  $J = 1.2$  Hz, 3H), 1.40 (s, 18H);  $^{13}\text{C}$  NMR (150 MHz,  $\text{CDCl}_3$ )  $\delta$  165.0, 152.4, 139.0, 136.2, 128.9, 126.2, 122.4, 120.4, 119.8, 119.1, 118.7, 112.7, 110.7, 72.4, 66.6, 35.1, 31.4, 31.4, 14.0; HRMS (ESI-TOF) Calcd for  $\text{C}_{27}\text{H}_{35}\text{N}_2\text{O}$  [M+H] 403.2749, found 403.2750.

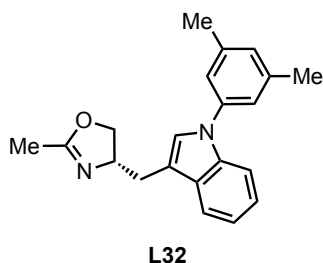

**(S)-4-((1-(3,5-dimethylphenyl)-1H-indol-3-yl)methyl)-2-methyl-4,5-dihydrooxazole (L32):** The title compound was prepared from **L23** (107 mg, 0.5 mmol) and 1-iodo-3,5-dimethylbenzene (174 mg, 1.5 mmol) according to a literature procedure.<sup>7</sup> Purification using silica gel column chromatography with 2:1 hexanes:EtOAc as the eluent gave the product as a colorless oil (156 mg, 98% yield).  $^1\text{H}$  NMR (600 MHz,  $\text{CDCl}_3$ )  $\delta$  7.67 (dt,  $J = 7.8, 1.0$  Hz, 1H), 7.56 (dt,  $J = 8.3, 0.9$  Hz, 1H), 7.24–7.19 (m, 1H), 7.19–7.15 (m, 2H), 7.10 (d,  $J = 1.5$  Hz, 2H), 6.98 (s, 1H), 4.57–4.44 (m, 1H), 4.23 (t,  $J = 8.9$  Hz, 1H), 4.03 (dd,  $J = 8.4, 7.3$  Hz, 1H), 3.29 (ddd,  $J = 14.6, 4.9, 1.0$  Hz, 1H), 2.82 (dd,  $J = 14.6, 8.9$  Hz, 1H), 2.40 (s, 6H), 2.00 (d,  $J = 1.2$  Hz, 3H);  $^{13}\text{C}$  NMR (150 MHz,  $\text{CDCl}_3$ )  $\delta$  165.0, 139.6, 139.3, 136.1, 128.9, 127.9, 126.0, 122.4, 121.8, 119.9, 119.1, 112.9, 110.7, 72.4, 66.5, 31.4, 21.3, 14.0; HRMS (ESI-TOF) Calcd for  $\text{C}_{21}\text{H}_{23}\text{N}_2\text{O}$  [M+H] 319.1810, found 319.1810.

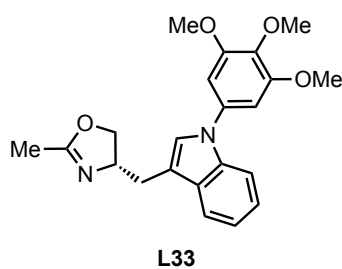

**(S)-2-methyl-4-((1-(3,4,5-trimethoxyphenyl)-1H-indol-3-yl)methyl)-4,5-dihydrooxazole (L33):** The title compound was prepared from **L23** (107 mg, 0.5 mmol) and 5-iodo-1,2,3-trimethoxybenzene (221 mg, 1.5 mmol) according to a literature procedure.<sup>7</sup> Purification using silica gel column chromatography with 1.5:1 hexanes:EtOAc as the eluent gave the product as a colorless oil (182 mg, 96% yield).  $^1\text{H}$  NMR (600 MHz,  $\text{CDCl}_3$ )  $\delta$  7.67 (dt,  $J = 7.8, 1.0$  Hz, 1H), 7.54 (dt,  $J = 8.2, 0.9$  Hz, 1H), 7.24 (ddd,  $J = 8.3, 7.0, 1.2$  Hz, 1H), 7.20–7.14 (m, 2H), 6.69 (s, 2H), 4.52 (dddd,  $J = 9.7, 8.5, 6.9, 5.4, 1.3$  Hz, 1H), 4.24 (dd,  $J = 9.4, 8.5$  Hz, 1H), 4.02 (dd,  $J = 8.5, 7.2$  Hz, 1H), 3.90 (d,  $J = 9.6$  Hz, 9H), 3.26 (ddd,  $J = 14.6, 5.3, 1.0$  Hz, 1H), 2.85 (ddd,  $J = 14.6, 8.5, 0.8$  Hz, 1H), 2.00 (d,  $J = 1.3$  Hz, 3H);  $^{13}\text{C}$  NMR (150 MHz,  $\text{CDCl}_3$ )  $\delta$  165.1, 153.8, 136.5, 136.3, 135.5, 128.9, 126.1, 122.6, 120.0, 119.2, 113.1, 110.6, 102.0, 72.4, 66.5, 61.0, 56.3, 31.3, 14.0; HRMS (ESI-TOF) Calcd for  $\text{C}_{22}\text{H}_{25}\text{N}_2\text{O}_4$  [M+H] 381.1814, found 381.1812.

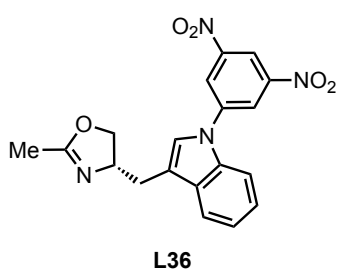

**(S)-4-((1-(3,5-dinitrophenyl)-1H-indol-3-yl)methyl)-2-methyl-4,5-dihydrooxazole (L36):** The title compound was prepared from **L23** (214 mg, 1 mmol) and 1-iodo-3,5-dinitrobenzene (441 mg, 1.5 mmol) according to a literature procedure.<sup>7</sup> Purification using silica gel column chromatography with 1:1 hexanes:EtOAc as the eluent gave the product as a yellow solid (289 mg, 76% yield).  $^1\text{H}$  NMR (600 MHz,  $\text{CDCl}_3$ )  $\delta$  8.95 (t,  $J = 2.0$  Hz, 1H), 8.73 (d,  $J = 2.0$  Hz, 2H), 7.74 (dt,  $J = 7.9, 0.9$  Hz, 1H), 7.66 (dd,  $J = 8.2, 0.8$  Hz, 1H), 7.41–7.37 (m, 2H), 7.33 (ddd,  $J = 7.9, 7.1, 0.9$  Hz, 1H), 4.56 (p,  $J = 7.1$  Hz, 1H), 4.34 (dd,  $J = 9.4, 8.5$  Hz, 1H), 4.03 (dd,  $J = 8.4, 7.4$  Hz, 1H), 3.19 (ddd,  $J = 14.8, 6.4, 1.1$  Hz, 1H), 2.97 (dd,  $J = 14.8, 7.1$  Hz, 1H), 2.03 (d,  $J = 1.2$  Hz, 3H);  $^{13}\text{C}$  NMR (150 MHz,  $\text{CDCl}_3$ )  $\delta$  165.4, 149.4, 142.1, 135.3, 130.1, 124.5, 124.4, 122.5, 122.0, 120.1, 117.4, 114.8, 109.8, 72.2, 66.1, 31.2, 14.0; HRMS (ESI-TOF) Calcd for  $\text{C}_{19}\text{H}_{17}\text{N}_4\text{O}_5$  [M+H] 381.1199, found 381.1198.

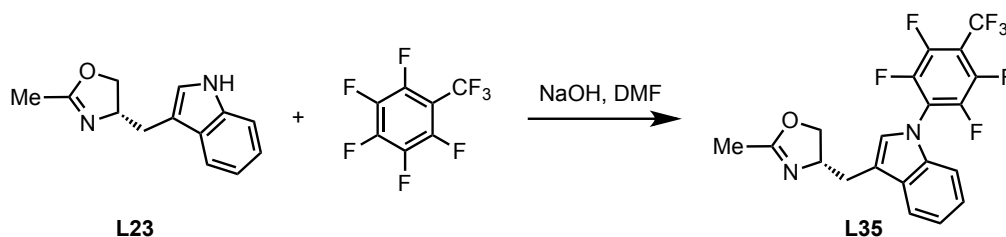

**Scheme S6:** Synthesis of (*S*)-2-methyl-4-((1-(2,3,5,6-tetrafluoro-4-(trifluoromethyl)phenyl)-1*H*-indol-3-yl)methyl)-4,5-dihydrooxazole (**L35**).<sup>12</sup>

**(*S*)-2-methyl-4-((1-(2,3,5,6-tetrafluoro-4-(trifluoromethyl)phenyl)-1*H*-indol-3-yl)methyl)-4,5-dihydrooxazole (**L35**):** The title compound was prepared from **L23** (214 mg, 1 mmol) and 1,2,3,4,5-pentafluoro-6-(trifluoromethyl)benzene (472 mg, 2 mmol) according to a literature procedure.<sup>12</sup> Purification using silica gel column chromatography with 2:1 hexanes:EtOAc as the eluent gave the product as a yellow solid (301 mg, 70% yield). <sup>1</sup>H NMR (600 MHz, CDCl<sub>3</sub>) δ 7.69 (d, *J* = 7.8 Hz, 1H), 7.34–7.27 (m, 2H), 7.14 (dd, *J* = 7.0, 3.9 Hz, 1H), 7.08 (s, 1H), 4.52 (q, *J* = 7.6 Hz, 1H), 4.26 (t, *J* = 9.0 Hz, 1H), 4.00 (t, *J* = 7.9 Hz, 1H), 3.22 (dd, *J* = 14.8, 5.4 Hz, 1H), 2.89 (dd, *J* = 14.8, 8.0 Hz, 1H), 1.99 (s, 3H); <sup>13</sup>C NMR (150 MHz, CDCl<sub>3</sub>) δ 165.4, 144.9 (dd, *J*<sub>C-F</sub> = 260.5, 14.9 Hz), 142.6 (dd, *J*<sub>C-F</sub> = 255.1, 14.3 Hz), 136.0, 129.0, 125.4, 123.8, 122.6 (t, *J*<sub>C-F</sub> = 13.3 Hz), 121.6, 120.7 (q, *J*<sub>C-F</sub> = 275.3 Hz), 119.5, 116.5, 110.8 (t, *J*<sub>C-F</sub> = 2.7 Hz), 108.0 (dtd, *J*<sub>C-F</sub> = 47.8, 35.1, 12.6 Hz), 72.1, 66.0, 31.0, 13.9; <sup>19</sup>F NMR (376 MHz, CDCl<sub>3</sub>) δ -56.2 (t, *J*<sub>F-F</sub> = 21.7 Hz, 3F), -136.0–(-140.4) (m, 2F), -142.8–(-145.5) (m, 2F); HRMS (ESI-TOF) Calcd for C<sub>20</sub>H<sub>14</sub>F<sub>7</sub>N<sub>2</sub>O [M+H] 431.0994, found 431.0993.

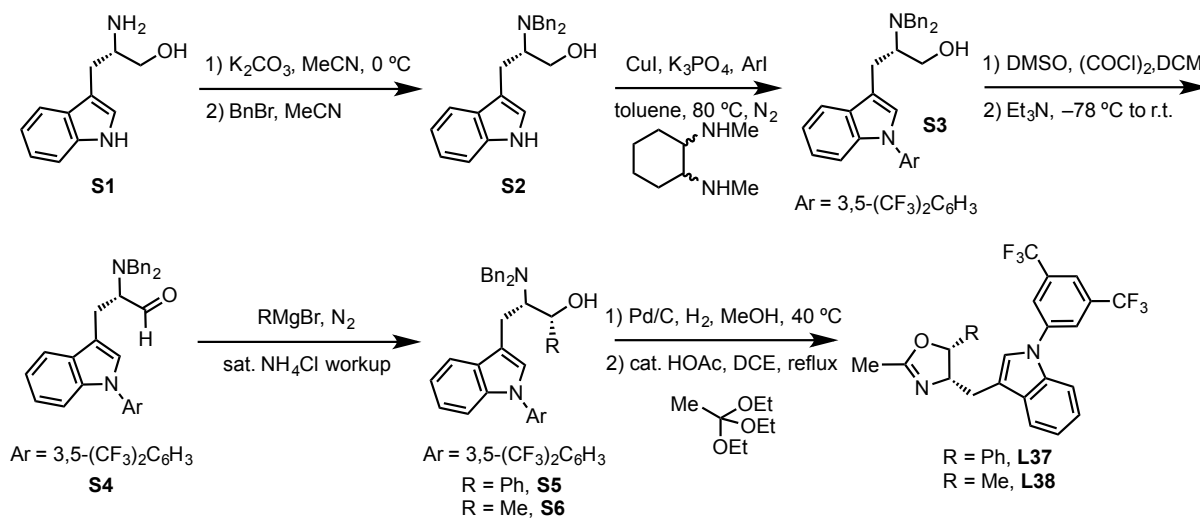

**Scheme S7:** Synthesis of **L37** and **L38**.<sup>7,13–15</sup>

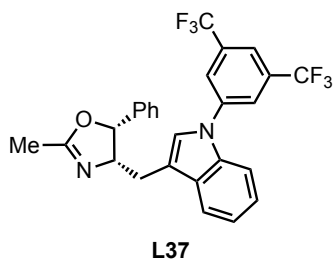

**(4S,5R)-4-((1-(3,5-bis(trifluoromethyl)phenyl)-1H-indol-3-yl)methyl)-2-methyl-5-phenyl-4,5-dihydrooxazole (L37):** The title compound was prepared by adapting several literature procedures.

*Benzyl protection:*<sup>13</sup> A solution of benzyl bromide (1.88g, 11 mmol) in MeCN (1 mL) was prepared and added dropwise to a solution of *L*-tryptophanol (**S1**, 950 mg, 5 mmol) and K<sub>2</sub>CO<sub>3</sub> (1.5 g, 11 mmol) in MeCN (10 mL) at 0 °C. The reaction mixture was filtered, concentrated under vacuum, and purified by silica gel column chromatography (4:1 hexanes:EtOAc) to afford 900 mg (48% yield) of **S2**.

*Ullmann coupling:*<sup>7</sup> To a 50-mL round-bottom flask equipped with a Teflon-coated magnetic stir bar, were added **S2** (371 mg, 1 mmol), CuI (17 mg, 9 mol%), K<sub>3</sub>PO<sub>4</sub> (423 mg, 2 mmol), *N,N'*-dimethyl-1,2-cyclohexanediamine (28.5 mg, 20 mol%), and 1-iodo-3,5-bis(trifluoromethyl)-benzene (510 mg, 1.5 mmol). The reaction flask was evacuated and backfilled with N<sub>2</sub> (×3), followed by addition of anhydrous toluene (5 mL). After being allowed to stir at 80 °C for 24 h, the reaction mixture was diluted with EtOAc and filtered through a plug of silica gel. The solvent was removed in *vacuo* to leave a brown residue, which upon purification by silica gel column chromatography (5:1 hexanes:EtOAc), afforded **S3** (545 mg, 94%).

*Swern oxidation:*<sup>14</sup> A solution of DMSO (0.16 mL, 2 mmol) in DCM (6 mL) was added dropwise to a solution of oxalyl chloride (0.11 mL, 1.2 mmol) in DCM (3 mL) at -78 °C and stirred for 15 min. To the reaction mixture, was added dropwise a solution of **S3** (545 mg, 0.94 mmol) in DCM (6.7 mL) at -78 °C, and the resulting solution was stirred for another 35 min. Et<sub>3</sub>N was then added, and reaction was slowly warmed to room temperature before treated with sat. NH<sub>4</sub>Cl. The organic layer was separated, washed with sat. NaHCO<sub>3</sub> (20 mL, ×1) and brine (20 mL, ×1), dried over Na<sub>2</sub>SO<sub>4</sub>, and concentrated to afford **S4**, which was brought on to the next step without further purification.

*Grignard addition:*<sup>15</sup> To aldehyde **S4** in THF (1.4 mL), was slowly added PhMgBr (0.5 mL, 3 M in diethyl ether) at 0 °C. The mixture was stirred for 12 h, followed by addition of sat. NH<sub>4</sub>Cl. The organic layer was separated, and the aqueous layer was extracted with EtOAc (10 mL, ×1). The combined organic layers were then washed with brine (20 mL, ×1) and dried over Na<sub>2</sub>SO<sub>4</sub>. The resulting organic solution was concentrated under vacuum and purified by silica gel column chromatography (10:1 hexanes:EtOAc) to afford **S5** (271 mg, 35% over two steps).

*Benzyl deprotection<sup>15</sup> and L37 synthesis:*<sup>7</sup> In a 50-mL round-bottom flask, **S5** (165 mg, 0.25 mmol) was first treated with a solution of HCl in diethylether to generate a white salt. After removal of the solvent, Pd/C (10 wt.%, 26 mg) and MeOH (2.5 mL) were added, and the reaction mixture was vigorously stirred under an H<sub>2</sub> atmosphere (1 atm) at 40 °C for 48 h. The Pd/C catalyst was removed by filtration through a plug of celite, and the resulting solution was concentrated under vacuum. The crude product was carried forward to the next step without further purification. Finally, oxazoline formation was completed according to a literature procedure.<sup>7</sup> Purification using silica gel column chromatography with 2:1 hexanes:EtOAc as the eluent gave the product (**L37**) as a light-yellow solid (70 mg, 56% over two steps). <sup>1</sup>H NMR (600 MHz, CDCl<sub>3</sub>) δ 7.87 (d, *J* = 1.5 Hz, 2H), 7.78 (s, 1H), 7.53 (d, *J* = 7.8 Hz, 1H), 7.48 (d, *J* = 8.2 Hz, 1H), 7.41–7.33 (m, 3H), 7.27 (dd, *J* = 3.2, 1.4 Hz, 2H), 7.25 (d, *J* = 4.0 Hz, 1H), 7.18 (t, *J* = 7.6 Hz, 1H), 6.62 (s, 1H), 5.63 (d, *J* = 9.8 Hz, 1H), 4.83–4.73 (m, 1H), 2.74–2.53 (m, 2H), 2.16 (d, *J* = 1.4 Hz, 3H); <sup>13</sup>C NMR (150 MHz, CDCl<sub>3</sub>) δ 164.8, 141.2, 136.7, 135.3, 133.1 (q, *J*<sub>C-F</sub> = 33.8 Hz), 129.5, 128.3, 128.2, 127.0, 125.0, 123.6, 123.2 (q, *J*<sub>C-F</sub> = 3.9 Hz), 123.0 (q, *J*<sub>C-F</sub> = 272.8 Hz), 121.0, 119.6, 118.9 (sept, *J*<sub>C-F</sub> = 3.8 Hz),

116.3, 109.8, 83.9, 69.1, 28.0, 14.2;  $^{19}\text{F}$  NMR (376 MHz,  $\text{CDCl}_3$ )  $\delta$  -63.2 (s, 6F); HRMS (ESI-TOF) Calcd for  $\text{C}_{27}\text{H}_{21}\text{F}_6\text{N}_2\text{O}$  [M+H] 503.1558, found 503.1559.

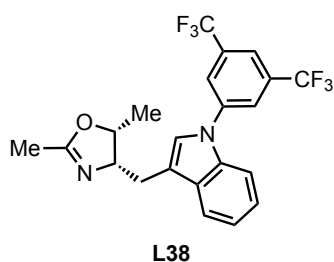

**(4*S*,5*R*)-4-((1-(3,5-bis(trifluoromethyl)phenyl)-1*H*-indol-3-yl)methyl)-2,5-dimethyl-4,5-dihydrooxazole (L38):** The title compound was prepared from **S3** (493 mg, 0.85 mmol) according to the above synthetic sequence, using  $\text{MeMgBr}$  as the Grignard reagent in lieu of  $\text{PhMgBr}$  (Scheme S7). Purification using silica gel column chromatography with 2:1 hexanes:EtOAc as the eluent gave the product as a colorless oil (137 mg, 37% yield over 4 steps).

$^1\text{H}$  NMR (600 MHz,  $\text{CDCl}_3$ )  $\delta$  7.97 (d,  $J = 1.6$  Hz, 2H), 7.80 (s, 1H), 7.68 (dt,  $J = 7.8, 0.9$  Hz, 1H), 7.53 (dt,  $J = 8.3, 0.8$  Hz, 1H), 7.33 (d,  $J = 1.1$  Hz, 1H), 7.30 (ddd,  $J = 8.3, 7.0, 1.2$  Hz, 1H), 7.24 (ddd,  $J = 7.9, 7.0, 0.9$  Hz, 1H), 4.82 (dq,  $J = 9.2, 6.6$  Hz, 1H), 4.51 (tdd,  $J = 9.2, 6.2, 1.6$  Hz, 1H), 3.06–2.92 (m, 2H), 2.00 (d,  $J = 1.4$  Hz, 3H), 1.36 (d,  $J = 6.5$  Hz, 3H);  $^{13}\text{C}$  NMR (150 MHz,  $\text{CDCl}_3$ )  $\delta$  164.5, 141.3, 135.5, 133.2 (q,  $J_{\text{C-F}} = 33.9$  Hz), 129.7, 124.8, 122.9 (q,  $J_{\text{C-F}} = 272.8$  Hz), 123.6, 123.5 (q,  $J_{\text{C-F}} = 3.4$  Hz), 121.1, 119.6, 119.1 (sept,  $J_{\text{C-F}} = 7.7, 3.6$  Hz), 117.2, 109.8, 78.5, 67.5, 26.0, 15.2, 14.3;  $^{19}\text{F}$  NMR (376 MHz,  $\text{CDCl}_3$ )  $\delta$  -63.2 (s, 6F); HRMS (ESI-TOF) Calcd for  $\text{C}_{22}\text{H}_{19}\text{F}_6\text{N}_2\text{O}$  [M+H] 441.1402, found 441.1409.

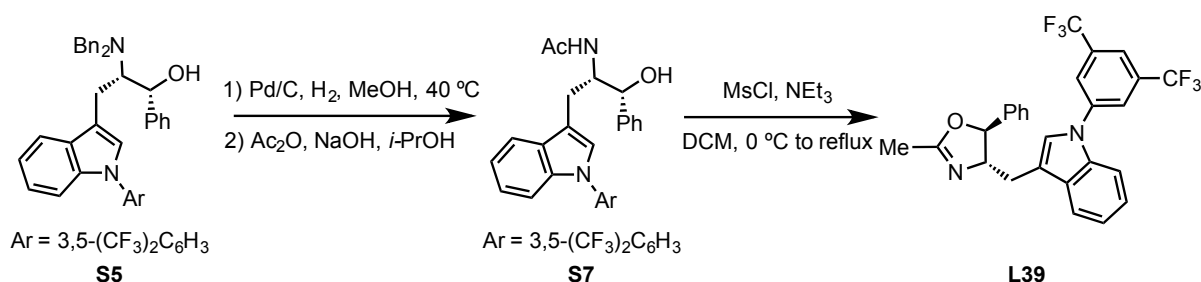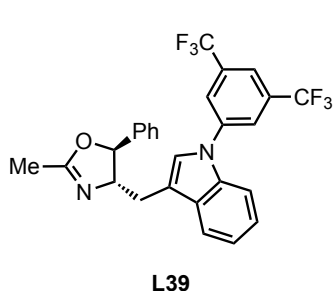

**(4*S*,5*S*)-4-((1-(3,5-bis(trifluoromethyl)phenyl)-1*H*-indol-3-yl)methyl)-2-methyl-5-phenyl-4,5-dihydrooxazole (L39):** The title compound was prepared by adapting a literature procedure.<sup>15–17</sup> Benzyl deprotection of **S5** (107 mg, 0.16 mmol) was first conducted with 17 mg of Pd/C (10 wt.%) under  $\text{H}_2$  atmosphere (1 atm) according to the above procedure.

*N*-Acetylation.<sup>16</sup> The crude product was dissolved in *i*-PrOH (1.2 mL), and the resulting solution was added to a solution of NaOH (18 mg, 0.45 mmol) in water (0.2 mL). To this combined solution, was gradually added acetic anhydride (44  $\mu\text{L}$ , 0.45 mmol), while maintaining the pH at approximately 8. After stirring at room temperature for 30 min, the reaction mixture was concentrated, extracted with EtOAc (5 mL,  $\times 2$ ), washed with water (5 mL,  $\times 1$ ) and brine (5 mL,  $\times 1$ ), and concentrated under vacuum again to afford crude **S7**, which was brought on to the next step without further purification.

*Oxazoline ring formation.*<sup>17</sup> To a flame-dried reaction tube equipped with a magnetic stir bar, were added **S7**, trimethylamine (55  $\mu\text{L}$ , 0.48 mmol), and anhydrous DCM (0.8 mL) under  $\text{N}_2$ . Methanesulfonyl chloride (14.5  $\mu\text{L}$ , 0.18 mmol) was slowly added at 0  $^\circ\text{C}$ . The reaction was stirred at 0  $^\circ\text{C}$  for 5 min and then heated up to 50  $^\circ\text{C}$  for 24 h. Upon completion, the reaction was quenched with sat.  $\text{NaHCO}_3$  (2 mL) and extracted with DCM (5 mL,  $\times 2$ ). The combined organic layers were dried over  $\text{Na}_2\text{SO}_4$ , concentrated under vacuum, and purified by column chromatography (3:1 hexanes:EtOAc) to afford **L39** as a colorless oil



(53.2 mg, 65% yield over 3 steps).  $^1\text{H NMR}$  (600 MHz,  $\text{CDCl}_3$ )  $\delta$  7.88 (d,  $J = 1.5$  Hz, 2H), 7.81 (s, 1H), 7.67 (dd,  $J = 7.9, 1.1$  Hz, 1H), 7.52 (d,  $J = 8.3$  Hz, 1H), 7.33–7.28 (m, 4H), 7.26–7.22 (m, 1H), 7.16 (s, 1H), 7.12 (dd,  $J = 7.5, 2.0$  Hz, 2H), 5.11 (d,  $J = 7.2$  Hz, 1H), 4.44 (tdd,  $J = 7.5, 6.1, 1.5$  Hz, 1H), 3.29 (ddd,  $J = 15.0, 6.3, 1.1$  Hz, 1H), 3.15–3.04 (m, 1H), 2.11 (d,  $J = 1.3$  Hz, 3H);  $^{13}\text{C NMR}$  (150 MHz,  $\text{CDCl}_3$ )  $\delta$  164.5, 141.2, 140.6, 135.4, 133.2 (q,  $J_{\text{C-F}} = 33.9$  Hz), 129.9, 128.7, 128.3, 125.7, 125.3, 123.7, 123.5 (q,  $J_{\text{C-F}} = 3.8$  Hz), 122.9 (q,  $J_{\text{C-F}} = 279.35$  Hz), 121.3, 119.7, 119.2 (sept,  $J_{\text{C-F}} = 3.8$  Hz), 115.4, 109.8, 86.1, 74.9, 31.1, 14.2;  $^{19}\text{F NMR}$  (376 MHz,  $\text{CDCl}_3$ )  $\delta$  -63.2 (s, 6F); **HRMS** (ESI-TOF) Calcd for  $\text{C}_{27}\text{H}_{21}\text{F}_6\text{N}_2\text{O}$  [ $\text{M}+\text{H}$ ] 503.1558, found 503.1560.

## Alkene Substrate Synthesis

**Table S2.** Alkene substrates **1a–b**, **1d**, **1i**, and **1k**.

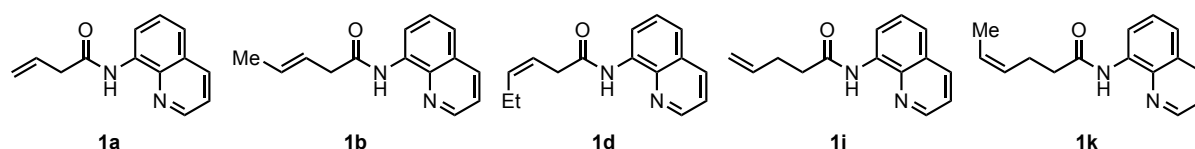

Alkene substrates **1a–b**, **1d**, **1i**, and **1k** were prepared according to literature procedures.<sup>18,19</sup>

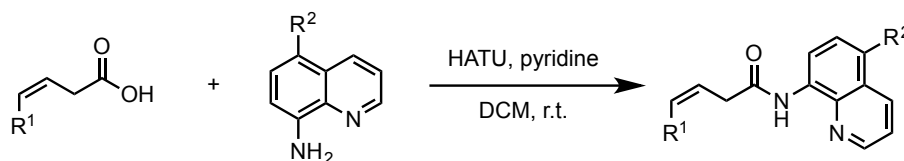

**Scheme S9:** General depiction of amide coupling.<sup>18</sup>

**General Procedure for Amide Coupling:** The appropriate carboxylic acid (1.05 equiv) was charged into a 25-mL round-bottom flask equipped with a Teflon-coated magnetic stir bar containing DCM (0.67 M). The appropriate amine (1 equiv), pyridine (2 equiv), and HATU (1.5 equiv) were added sequentially, and the reaction was stirred at ambient temperature for 20 h. The deep brown solution was diluted with EtOAc (30 mL), washed with sat.  $\text{NaHCO}_3$  (20 mL,  $\times 2$ ) and brine (20 mL,  $\times 1$ ), and dried over  $\text{Na}_2\text{SO}_4$ . The solvent was removed under vacuum and the resulting residue was purified by column chromatography (10:1 hexanes:EtOAc) to afford the corresponding amide.

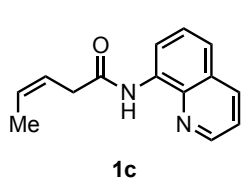

**(Z)-N-(quinolin-8-yl)pent-3-enamide (1c):** The title compound was prepared from (*Z*)-pent-3-enoic acid (1 g, 10 mmol) and 8-aminoquinoline (1.4 g, 9.8 mmol) according to the general amide coupling procedure. Compound **1c** was isolated as a light-brown oil (908 mg, 41% yield).  $^1\text{H NMR}$  (600 MHz,  $\text{CDCl}_3$ )  $\delta$  10.05 (s, 1H), 8.84–8.72 (m, 2H), 8.15 (dd,  $J = 8.3, 1.7$  Hz, 1H), 7.56–7.47 (m, 2H), 7.44 (ddd,  $J = 8.4, 4.2, 1.3$  Hz, 1H), 5.98–5.88 (m, 1H), 5.81 (dtd,  $J = 11.0, 7.4, 1.9$  Hz, 1H), 3.43–3.28 (m, 2H), 1.87–1.72 (m, 3H);  $^{13}\text{C NMR}$  (150 MHz,  $\text{CDCl}_3$ )  $\delta$  169.6, 148.2, 138.5, 136.2, 134.5, 129.6, 127.9, 127.4, 122.3, 121.5, 121.5, 116.4, 36.5, 13.1; **HRMS** (ESI-TOF) Calcd for  $\text{C}_{14}\text{H}_{15}\text{N}_2\text{O}$  [ $\text{M}+\text{H}$ ] 227.1184, found 227.1180.

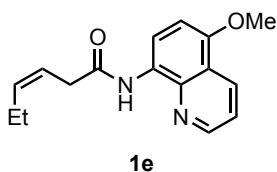

**(Z)-N-(5-methoxyquinolin-8-yl)hex-3-enamide (1e):** The title compound was prepared from (Z)-hex-3-enoic acid (376 mg, 3.3 mmol) and 5-methoxyquinolin-8-amine (523 mg, 3 mmol) according to the general amide coupling procedure. Compound **1e** was isolated as a brown oil (324 mg, 40% yield).  $^1\text{H NMR}$  (600 MHz,  $\text{CDCl}_3$ )  $\delta$  9.81 (s, 1H), 8.80 (dq,  $J = 4.4, 1.6$  Hz, 1H), 8.69 (dd,  $J = 8.5, 1.3$  Hz, 1H), 8.56 (dq,  $J = 8.4, 1.8$  Hz, 1H), 7.42 (dt,  $J = 8.1, 3.8$  Hz, 1H), 6.83 (dd,  $J = 8.6, 3.2$  Hz, 1H), 5.82 (ddd,  $J = 10.5, 6.1, 1.5$  Hz, 1H), 5.78–5.67 (m, 1H), 4.03–3.93 (m, 3H), 3.32 (d,  $J = 7.5$  Hz, 2H), 2.26–2.15 (m, 2H), 1.07 (td,  $J = 7.5, 1.2$  Hz, 3H);  $^{13}\text{C NMR}$  (150 MHz,  $\text{CDCl}_3$ )  $\delta$  169.2, 150.2, 148.6, 139.2, 137.0, 131.1, 127.9, 120.8, 120.6, 120.4, 116.5, 104.3, 55.7, 36.7, 20.8, 14.0; **HRMS** (ESI-TOF) Calcd for  $\text{C}_{16}\text{H}_{19}\text{N}_2\text{O}_2$  [ $\text{M}+\text{H}$ ] 271.1447, found 271.1446.

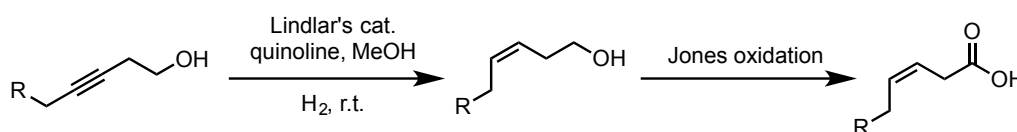

**Scheme S10:** Synthesis of (Z)-alkenyl carboxylic acid.<sup>18,20</sup>

**General Procedure for Alkyne Semireduction<sup>20</sup> and Jones Oxidation:<sup>18</sup>** To a stirred solution of alkyne substrate in anhydrous MeOH (0.33 M), were added Lindlar's catalyst (5 mol%) and quinoline (7 mol%). The reaction mixture was stirred under  $\text{H}_2$  atmosphere (1 atm) for 3 days at room temperature. After the reaction had reached completion (as monitored by TLC), the resulting suspension was filtered through a plug of celite and concentrated under vacuum. The crude alcohol was oxidized to the corresponding carboxylic acid following a literature procedure.

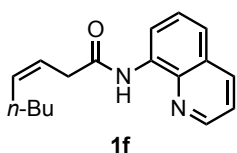

**(Z)-N-(quinolin-8-yl)oct-3-enamide (1f):** The title compound was prepared from (Z)-oct-3-en-1-ol (1.28 g, 10 mmol) according to the general Jones oxidation and amide coupling procedures. Compound **1f** was isolated as a brown oil (1.09 g, 41% yield over 2 steps).  $^1\text{H NMR}$  (600 MHz,  $\text{CDCl}_3$ )  $\delta$  10.05 (s, 1H), 8.81–8.73 (m, 2H), 8.15 (dt,  $J = 8.4, 1.4$  Hz, 1H), 7.57–7.48 (m, 2H), 7.44 (ddd,  $J = 8.2, 4.2, 0.9$  Hz, 1H), 5.88–5.82 (m, 1H), 5.81–5.71 (m, 1H), 3.35 (dd,  $J = 7.4, 1.2$  Hz, 2H), 2.20 (qd,  $J = 7.2, 1.3$  Hz, 2H), 1.45 (tt,  $J = 7.4, 5.8$  Hz, 2H), 1.41–1.32 (m, 2H), 0.89 (t,  $J = 7.2$  Hz, 3H);  $^{13}\text{C NMR}$  (150 MHz,  $\text{CDCl}_3$ )  $\delta$  169.7, 148.2, 138.6, 136.2, 135.6, 134.5, 127.9, 127.4, 121.5, 121.5, 121.5, 116.4, 36.9, 31.5, 27.3, 22.3, 14.0; **HRMS** (ESI-TOF) Calcd for  $\text{C}_{17}\text{H}_{21}\text{N}_2\text{O}$  [ $\text{M}+\text{H}$ ] 269.1654, found 269.1653.

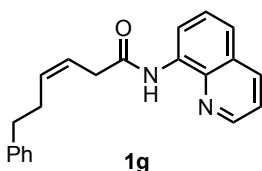

**(Z)-6-phenyl-N-(quinolin-8-yl)hex-3-enamide (1g):** The title compound was prepared from 6-phenylhex-3-yn-1-ol (523 mg, 3 mmol) according to the general semi-reduction, Jones oxidation, and amide coupling procedures. Compound **1g** was isolated as a light-brown oil (209 mg, 22% yield over 3 steps).  $^1\text{H NMR}$  (600 MHz,  $\text{CDCl}_3$ )  $\delta$  10.00 (s, 1H), 8.82–8.73 (m, 2H), 8.15 (dd,  $J = 8.3, 1.7$  Hz, 1H), 7.57–7.47 (m, 2H), 7.44 (dd,  $J = 8.3, 4.2$  Hz, 1H), 7.28–7.23 (m, 2H), 7.23–7.18 (m, 2H), 7.14 (td,  $J = 7.2, 1.5$  Hz, 1H), 5.91–5.84 (m, 1H), 5.84–5.77 (m, 1H), 3.28 (dd,  $J = 7.3, 1.2$  Hz, 2H), 2.79 (t,  $J = 7.7$  Hz, 2H), 2.55–2.48 (m, 2H);  $^{13}\text{C NMR}$  (150 MHz,  $\text{CDCl}_3$ )  $\delta$  169.5, 148.2, 141.5, 138.6, 136.3, 134.4, 134.2, 128.5, 128.4, 127.9, 127.4, 125.9, 122.1, 121.6, 121.6, 116.4, 36.8, 35.5, 29.4; **HRMS** (ESI-TOF) Calcd for  $\text{C}_{21}\text{H}_{21}\text{N}_2\text{O}$  [ $\text{M}+\text{H}$ ] 317.1654, found 317.1658.

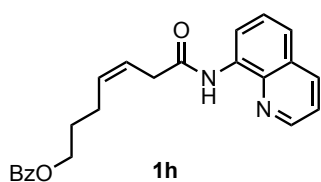

**(Z)-7-oxo-7-(quinolin-8-ylamino)hept-4-en-1-yl benzoate (1h):**

Internal alkyne 7-hydroxyhept-4-yn-1-yl benzoate was synthesized following a literature procedure.<sup>21</sup> The title compound was prepared from 7-hydroxyhept-4-yn-1-yl benzoate (232 mg, 1 mmol) according to the general semi-reduction, Jones oxidation, and amide coupling procedures. Compound **1h** was isolated as a light-yellow oil (124 mg, 33% yield over 3 steps). <sup>1</sup>H NMR (600 MHz, CDCl<sub>3</sub>) δ 10.03 (s, 1H), 8.76 (ddd, *J* = 8.7, 5.8, 1.5 Hz, 2H), 8.14 (dd, *J* = 8.3, 1.6 Hz, 1H), 8.04–7.94 (m, 2H), 7.56–7.46 (m, 3H), 7.46–7.35 (m, 3H), 5.87 (q, *J* = 6.2 Hz, 2H), 4.39 (t, *J* = 6.4 Hz, 2H), 3.38 (d, *J* = 6.1 Hz, 2H), 2.40 (q, *J* = 6.9 Hz, 2H), 2.01–1.91 (m, 2H); <sup>13</sup>C NMR (150 MHz, CDCl<sub>3</sub>) δ 169.4, 166.7, 148.4, 138.6, 136.5, 136.4, 134.5, 134.0, 133.0, 130.4, 129.6, 128.5, 128.1, 127.5, 122.8, 121.7, 116.6, 64.4, 37.0, 28.6, 24.2; HRMS (ESI-TOF) Calcd for C<sub>23</sub>H<sub>23</sub>N<sub>2</sub>O<sub>3</sub> [M+H] 375.1709, found 375.1710.

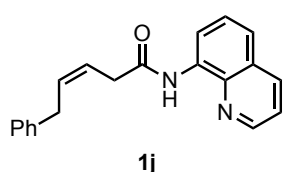

**(Z)-5-phenyl-N-(quinolin-8-yl)pent-3-enamide (1j):**

The title compound was prepared from 5-phenylpent-3-yn-1-ol (368 mg, 2.3 mmol) according to the general semi-reduction, Jones oxidation, and amide coupling procedure. **1j** was isolated as a light-brown oil (158 mg, 23% yield for 3 steps). <sup>1</sup>H NMR (600 MHz, CDCl<sub>3</sub>) δ 9.98 (s, 1H), 8.76–8.64 (m, 2H), 8.05 (dt, *J* = 8.2, 1.6 Hz, 1H), 7.48–7.38 (m, 2H), 7.34 (ddd, *J* = 8.2, 4.2, 1.4 Hz, 1H), 7.21–7.13 (m, 4H), 7.09 (ddt, *J* = 8.0, 3.6, 2.1 Hz, 1H), 5.92 (dtt, *J* = 10.1, 7.2, 1.4 Hz, 1H), 5.84 (dtq, *J* = 10.7, 7.5, 1.6 Hz, 1H), 3.47 (dd, *J* = 7.6, 1.7 Hz, 2H), 3.38 (dd, *J* = 7.6, 1.4 Hz, 2H); <sup>13</sup>C NMR (150 MHz, CDCl<sub>3</sub>) δ 169.2, 148.2, 139.9, 138.4, 136.2, 134.4, 133.4, 128.5, 128.4, 127.9, 127.3, 126.1, 122.3, 121.5, 121.5, 116.4, 36.8, 33.7; HRMS (ESI-TOF) Calcd for C<sub>20</sub>H<sub>19</sub>N<sub>2</sub>O [M+H] 303.1497, found 303.1495.

## Indole Nucleophile Synthesis

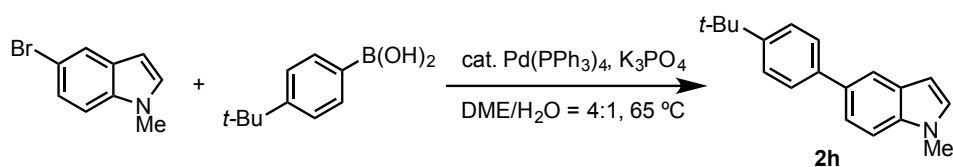

**Scheme S11:** Synthesis of 5-(4-(*tert*-butyl)phenyl)-1-methyl-1*H*-indole (**2h**).<sup>22</sup>

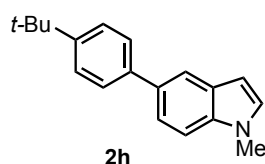

**5-(4-(*tert*-butyl)phenyl)-1-methyl-1*H*-indole (**2h**):**<sup>22</sup> To a 50-mL Schlenk flask equipped with a magnetic stir bar, were added 5-bromo-1-methyl-1*H*-indole (210 mg, 1 mmol), (4-(*tert*-butyl)phenyl)boronic acid (214 mg, 1.2 mmol), Pd(PPh<sub>3</sub>)<sub>4</sub> (23 mg, 2 mol%), and K<sub>3</sub>PO<sub>4</sub> (425 mg, 2 mmol). The reaction flask was evacuated and backfilled with N<sub>2</sub> (×3), followed by addition of DME and water (5 mL, 4:1 v/v). The reaction mixture was stirred at 65 °C overnight, after which it was allowed to cool down to room temperature, concentrated under vacuum, and diluted with EtOAc (5 mL). The resulting solution was washed with sat. NaHCO<sub>3</sub> (10 mL, ×1) and brine (10 mL, ×1) and dried over Na<sub>2</sub>SO<sub>4</sub>. The organic solvent was removed under vacuum, and the residue was purified by column chromatography (10:1 hexanes:EtOAc) to afford the product as a light-orange solid (166 mg, 63% yield). <sup>1</sup>H NMR (600 MHz, CDCl<sub>3</sub>) δ 7.85–7.80 (m, 1H), 7.62–7.55 (m, 2H), 7.47 (td, *J* = 8.3, 1.9 Hz, 3H), 7.36 (d, *J* = 8.5 Hz, 1H), 7.06 (d, *J* = 3.1 Hz, 1H), 6.52 (d, *J* = 3.0 Hz, 1H), 3.81 (s, 3H), 1.37 (d, *J* = 0.9 Hz, 9H); <sup>13</sup>C NMR (150 MHz, CDCl<sub>3</sub>) δ 149.1, 139.7, 136.1, 132.7, 129.3, 128.9, 127.0, 125.6, 121.4, 119.2, 109.3, 101.2, 34.4, 32.9, 31.4; HRMS (ESI-TOF) Calcd for C<sub>19</sub>H<sub>22</sub>N [M+H] 264.1752, found 264.1752.

## Reaction Optimization Details

**Table S3.** Optimization of reaction solvent.<sup>a</sup>

| Entry | Solvent               | Yield <sup>b</sup> (%) | <i>er</i> <sup>c</sup> |
|-------|-----------------------|------------------------|------------------------|
| 1     | toluene               | 22                     | 63:37                  |
| 2     | THF                   | 17                     | 66:34                  |
| 3     | MeCN                  | 18                     | 59:41                  |
| 4     | MeOH                  | trace                  | --                     |
| 5     | DMF                   | trace                  | --                     |
| 6     | HFIP                  | 60                     | 57:43                  |
| 7     | <b>THF/HFIP (1:1)</b> | <b>62</b>              | <b>78:22</b>           |
| 8     | THF/HFIP (1:2)        | 62                     | 74:26                  |
| 9     | THF/HFIP (2:1)        | 33                     | 78:22                  |

<sup>a</sup>Reaction conditions: **1a** (0.1 mmol), **2b** (3 equiv), **3a** (4 equiv), Pd(OAc)<sub>2</sub> (10 mol%), **L23** (20 mol%), BQ (20 mol%), KF (2 equiv), O<sub>2</sub> (1 atm), 2 d. <sup>b</sup>Yields were determined by <sup>1</sup>H NMR analysis of the crude reaction mixture using CH<sub>2</sub>Br<sub>2</sub> as internal standard. <sup>c</sup>The *er* was determined by 2D LC/SFC analysis.

**Table S4.** Optimization of palladium source.<sup>a</sup>

| Entry | Pd Source                                             | Yield <sup>b</sup> (%) | <i>er</i> <sup>c</sup> |
|-------|-------------------------------------------------------|------------------------|------------------------|
| 1     | Pd(TFA) <sub>2</sub>                                  | 44                     | 90:10                  |
| 2     | PdCl <sub>2</sub>                                     | trace                  | --                     |
| 3     | Pd(MeCN) <sub>4</sub> (BF <sub>4</sub> ) <sub>2</sub> | 65                     | 90:10                  |
| 4     | Pd(PhCN) <sub>2</sub> Cl <sub>2</sub>                 | 58                     | 92:8                   |
| 5     | PdBr <sub>2</sub>                                     | 35                     | 90:10                  |
| 6     | <b>Pd(OAc)<sub>2</sub></b>                            | <b>77</b>              | <b>91:9</b>            |

<sup>a</sup>Reaction conditions: **1b** (0.1 mmol), **2a** (3 equiv), **3a** (4 equiv), **L34** (20 mol%), BQ (20 mol%), KF (2 equiv), HFIP/THF (1:1, 0.2 mL), O<sub>2</sub> (1 atm), 2 d. <sup>b</sup>Yields were determined by <sup>1</sup>H NMR analysis of the crude reaction mixture using CH<sub>2</sub>Br<sub>2</sub> as internal standard. <sup>c</sup>The *er* was determined by 2D LC/SFC analysis.

## General Procedure for Asymmetric Alkene Carboboration

**General Procedure:** To an 8-mL reaction tube equipped with a Teflon-coated magnetic stir bar were added the alkene substrate (0.1 mmol), the appropriate carbon nucleophile (0.3 mmol), bis(pinacolato)diboron (0.4 mmol), Pd(OAc)<sub>2</sub> (10 mol%), **L34** (20 mol%), benzoquinone (20 mol%), and NaF (0.2 mmol). The tube was sealed with a screw-top septum cap and was then evacuated and backfilled with O<sub>2</sub> (×3). Under positive O<sub>2</sub> pressure, HFIP/THF/DMF (0.2 mL, 2:2:1, v/v/v) was added. All needle inlets/outlets were removed, and the reaction was placed in a heating block that was pre-heated to 45 °C. After 5 days, the dark black reaction mixture was allowed to cool to room temperature and directly purified by rapid silica gel column chromatography—with a total residence time less than 20 min to prevent alkyl boronate decomposition—affording the pure product.

**Notes:**<sup>23</sup> Column chromatography should be performed quickly to prevent product decomposition on silica. The recommended residence time is 10–15 min for reactions on 0.1 mmol scale. It is also important to use a short bed of silica gel (approximately 6 cm of silica for a 2.5 cm diameter column). If pinacol is still present after column, it can be removed by azeotropic distillation.

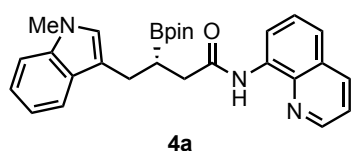

**(S)-4-(1-methyl-1H-indol-3-yl)-N-(quinolin-8-yl)-3-(4,4,5,5-tetramethyl-1,3,2-dioxaborolan-2-yl)butanamide (4a):** The title compound was prepared from **1a** (21.2 mg, 0.1 mmol), *N*-methylindole (39.2 mg, 0.3 mmol), and bis(pinacolato)diboron (101.6 mg, 0.4 mmol) according to the general asymmetric carboboration procedure. Purification using silica gel column chromatography with 3:1 hexanes:EtOAc as the eluent gave the product as a yellow oil (37.1 mg, 79% yield, 86:14 *er*).  $[\alpha]_D^{20} = +9.4$  (*c* = 0.35 Chloroform, 86:14 *er*). **SFC** (chiral column) The enantiomeric ratio was determined by chiral SFC on a Daicel IB column (3 μm, 4.6×250 mm), 35% MeOH/CO<sub>2</sub>, 4.0 mL/min, λ = 241 nm, *t* (major) = 2.088 min, *t* (minor) = 2.499 min.

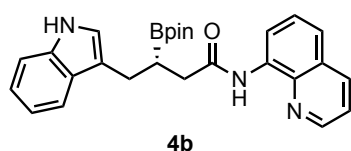

**(S)-4-(1H-indol-3-yl)-N-(quinolin-8-yl)-3-(4,4,5,5-tetramethyl-1,3,2-dioxaborolan-2-yl)butanamide (4b):** The title compound was prepared from **1a** (21.2 mg, 0.1 mmol), indole (35.1 mg, 0.3 mmol), and bis(pinacolato)diboron (101.6 mg, 0.4 mmol) according to the general asymmetric carboboration procedure. Purification using silica gel column chromatography with 3:1 hexanes:EtOAc as the eluent gave the product as a light-orange solid (32.3 mg, 71% yield, 83:17 *er*).  $[\alpha]_D^{20} = +10.6$  (*c* = 0.35 Chloroform, 83:17 *er*). **SFC** (chiral column) The enantiomeric ratio was determined by chiral SFC on a Daicel IB column (3 μm, 4.6×250 mm), 35% MeOH/CO<sub>2</sub>, 4.0 mL/min, λ = 241 nm, *t* (major) = 2.296 min, *t* (minor) = 2.539 min.

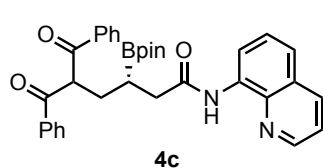

**(S)-5-benzoyl-6-oxo-6-phenyl-N-(quinolin-8-yl)-3-(4,4,5,5-tetramethyl-1,3,2-dioxaborolan-2-yl)hexanamide (4c):** The title compound was prepared from **1a** (21.2 mg, 0.1 mmol), 1,3-diphenylpropane-1,3-dione (67.3 mg, 0.3 mmol), and bis(pinacolato)diboron (101.6 mg, 0.4 mmol) according to the general asymmetric carboboration procedure. Purification using silica gel column chromatography with 7:1 hexanes:acetone as the eluent gave the product as a white solid (16.8 mg, 30% yield, 75:25 *er*). **SFC** (chiral column) The enantiomeric ratio was determined

by chiral SFC on a Daicel IBN column (3  $\mu\text{m}$ , 4.6 $\times$ 250 mm), 30% MeOH/CO<sub>2</sub>, 4.0 mL/min,  $\lambda$  = 241 nm, t (major) = 2.319 min, t (minor) = 2.515 min.

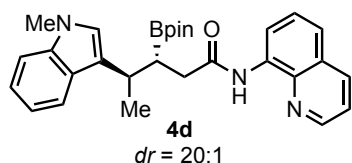

**(3*R*,4*R*)-4-(1-methyl-1*H*-indol-3-yl)-*N*-(quinolin-8-yl)-3-(4,4,5,5-tetramethyl-1,3,2-dioxaborolan-2-yl)pentanamide**

**(4d):** The title compound was prepared from **1b** (22.6 mg, 0.1 mmol), *N*-methylindole (39.2 mg, 0.3 mmol), and bis(pinacolato)diboron (101.6 mg, 0.4 mmol) according to the general asymmetric carboboration procedure. Purification using silica gel column chromatography with 4:1 hexanes:EtOAc as the eluent gave the product as a yellow oil (38.1 mg, 79% yield, 91:9 *er*).  $[\alpha]_{\text{D}}^{20}$  = +16.3 (c = 0.4 Chloroform, 91:9 *er*). This product was isolated as an inseparable 20:1 mixture of diastereomers. The reported *dr* was determined by <sup>1</sup>H NMR analysis of purified **4d** and is consistent with that of the crude reaction mixture. The following analytical data correspond to the mixture. <sup>1</sup>H NMR (600 MHz, CDCl<sub>3</sub>)  $\delta$  9.68 (s, 1H), 9.47 (s, 0.05H), 8.79–8.67 (m, 2.1H), 8.12 (dd, *J* = 8.3, 1.6 Hz, 1.05H), 7.69 (dd, *J* = 7.9, 1.0 Hz, 1.05H), 7.52–7.39 (m, 3.15H), 7.24–7.12 (m, 2.1H), 7.05 (ddd, *J* = 7.8, 6.9, 1.0 Hz, 1.05H), 6.98 (s, 1H), 6.88 (s, 0.05H), 3.71 (s, 3.15H), 3.43 (t, *J* = 6.9 Hz, 1H), 3.17 (dd, *J* = 10.8, 6.9 Hz, 0.05H), 2.76 (dd, *J* = 15.2, 10.6 Hz, 1H), 2.67 (dd, *J* = 15.2, 5.5 Hz, 1H), 2.63–2.58 (m, 0.1H), 2.09 (dt, *J* = 10.5, 6.0 Hz, 1H), 1.94 (td, *J* = 10.3, 5.8 Hz, 0.05H), 1.47 (d, *J* = 6.9 Hz, 0.15H), 1.43 (d, *J* = 7.0 Hz, 3H), 1.31 (s, 0.3H), 1.28 (s, 0.3H), 1.12 (s, 6H), 1.06 (s, 6H); <sup>13</sup>C NMR (150 MHz, CDCl<sub>3</sub>)  $\delta$  172.3, 147.9, 138.2, 136.8, 136.2, 134.8, 127.8, 127.5, 127.4, 126.0, 121.4, 121.2, 120.9, 119.8, 119.6, 118.4, 116.3, 108.8, 83.0, 37.2, 32.6, 31.1, 24.8, 24.5, 20.3; HRMS (ESI-TOF) Calcd for C<sub>29</sub>H<sub>35</sub>BN<sub>3</sub>O<sub>3</sub> [M+H] 483.2808, found 483.2809; SFC (chiral column) The enantiomeric ratio was determined by chiral SFC on a Daicel IBN column (3  $\mu\text{m}$ , 4.6 $\times$ 250 mm), 25% MeOH/CO<sub>2</sub>, 4.0 mL/min,  $\lambda$  = 241 nm, t (major) = 2.793 min, t (minor) = 3.783 min.

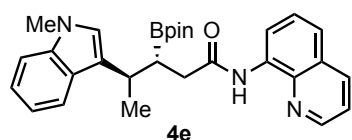

**(3*R*,4*R*)-4-(1-methyl-1*H*-indol-3-yl)-*N*-(quinolin-8-yl)-3-(4,4,5,5-tetramethyl-1,3,2-dioxaborolan-2-yl)pentanamide**

**(4e):** The title compound was prepared from **1c** (22.6 mg, 0.1 mmol), *N*-methylindole (39.2 mg, 0.3 mmol), and bis(pinacolato)diboron (101.6 mg, 0.4 mmol) according to the general asymmetric carboboration procedure. Purification using silica gel column chromatography with 4:1 hexanes:EtOAc as the eluent gave the product as a yellow oil (37.1 mg, 77% yield, 91:9 *er*). SFC (chiral column) The enantiomeric ratio was determined by chiral SFC on a Daicel IBN column (3  $\mu\text{m}$ , 4.6 $\times$ 250 mm), 25% MeOH/CO<sub>2</sub>, 4.0 mL/min,  $\lambda$  = 241 nm, t (major) = 2.911 min, t (minor) = 3.875 min.

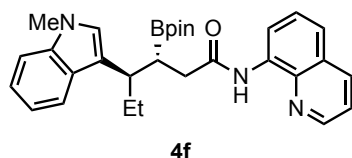

**(3*R*,4*R*)-4-(1-methyl-1*H*-indol-3-yl)-*N*-(quinolin-8-yl)-3-(4,4,5,5-tetramethyl-1,3,2-dioxaborolan-2-yl)hexanamide**

**(4f):** The title compound was prepared from **1d** (24.0 mg, 0.1 mmol), *N*-methylindole (39.2 mg, 0.3 mmol), and bis(pinacolato)diboron (101.6 mg, 0.4 mmol) according to the general asymmetric carboboration procedure. Purification using silica gel column chromatography with 5:1 hexanes:EtOAc as the eluent gave the product as a yellow oil (37.7 mg, 76% yield, 94:6 *er*).  $[\alpha]_{\text{D}}^{20}$  = +31.7 (c = 0.5 Chloroform, 94:6 *er*). <sup>1</sup>H NMR (600 MHz, CDCl<sub>3</sub>)  $\delta$  9.69 (s, 1H), 8.83–8.69 (m, 2H), 8.13 (dd, *J* = 8.2, 1.7 Hz, 1H), 7.66 (d, *J* = 7.9 Hz, 1H), 7.54–7.38 (m, 3H), 7.22 (d, *J* = 8.1 Hz, 1H), 7.15 (t, *J* = 7.6 Hz, 1H), 7.07–6.95 (m, 2H), 3.73 (s, 3H), 3.12 (ddd, *J* = 9.7, 7.7, 4.3 Hz, 1H), 2.81–2.66 (m, 2H), 2.15–2.03 (m, 1H), 1.92 (dq, *J* = 14.6, 7.3, 4.4 Hz, 1H), 1.78 (dtd, *J* = 13.6, 7.1, 2.2 Hz, 1H), 1.03 (s, 6H), 0.97 (s,

6H), 0.86 (t,  $J = 7.3$  Hz, 3H);  $^{13}\text{C}$  NMR (150 MHz,  $\text{CDCl}_3$ )  $\delta$  172.2, 147.9, 138.3, 136.6, 136.2, 134.8, 128.6, 127.9, 127.4, 126.6, 121.4, 121.1, 120.9, 119.6, 118.4, 117.6, 116.3, 108.7, 82.9, 38.7, 38.4, 32.6, 27.8, 24.8, 24.5, 12.1; **HRMS** (ESI-TOF) Calcd for  $\text{C}_{30}\text{H}_{37}\text{BN}_3\text{O}_3$  [M+H] 497.2964, found 497.2970; **SFC** (chiral column) The enantiomeric ratio was determined by chiral SFC on a Daicel IBN column (3  $\mu\text{m}$ , 4.6 $\times$ 250 mm, 25% MeOH/ $\text{CO}_2$ , 4.0 mL/min,  $\lambda = 241$  nm,  $t$  (major) = 2.293 min,  $t$  (minor) = 3.275 min; **X-ray** (single-crystal) Colorless needle crystals of X-ray diffraction quality were obtained by vapor diffusion of hexanes into a saturated solution of **4f** in EtOH (CCDC 1888952).<sup>24</sup>

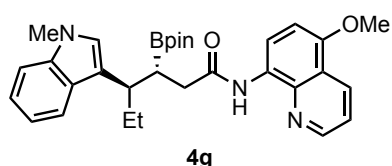

**(3R,4R)-N-(5-methoxyquinolin-8-yl)-4-(1-methyl-1H-indol-3-yl)-3-(4,4,5,5-tetramethyl-1,3,2-dioxaborolan-2-yl)hexanamide (4g):** The compound was prepared from **1e** (27.0 mg, 0.1 mmol), *N*-methylindole (39.2 mg, 0.3 mmol), and bis(pinacolato)diboron (101.6 mg, 0.4 mmol) according

to the general asymmetric carboboration procedure. Purification using silica gel column chromatography with 5:1 hexanes:EtOAc as the eluent gave the product as a yellow solid (31.5 mg, 60% yield, 94:6 *er*).  $[\alpha]_{\text{D}}^{20} = +26.4$  ( $c = 0.45$  Chloroform, 94:6 *er*).  $^1\text{H}$  NMR (600 MHz,  $\text{CDCl}_3$ )  $\delta$  9.46 (s, 1H), 8.76 (d,  $J = 4.1$  Hz, 1H), 8.68 (d,  $J = 8.6$  Hz, 1H), 8.54 (d,  $J = 8.3$  Hz, 1H), 7.66 (d,  $J = 7.9$  Hz, 1H), 7.40 (dd,  $J = 8.5, 4.2$  Hz, 1H), 7.23 (d,  $J = 8.2$  Hz, 1H), 7.15 (t,  $J = 7.6$  Hz, 1H), 7.03 (t,  $J = 7.5$  Hz, 1H), 6.98 (s, 1H), 6.81 (d,  $J = 8.6$  Hz, 1H), 3.97 (s, 3H), 3.73 (s, 3H), 3.11 (td,  $J = 8.8, 4.2$  Hz, 1H), 2.71 (dd,  $J = 8.0, 5.2$  Hz, 2H), 2.08 (q,  $J = 8.0$  Hz, 1H), 1.99–1.88 (m, 1H), 1.77 (dt,  $J = 14.2, 7.5$  Hz, 1H), 1.02 (s, 6H), 0.96 (s, 6H), 0.85 (t,  $J = 7.4$  Hz, 3H);  $^{13}\text{C}$  NMR (150 MHz,  $\text{CDCl}_3$ )  $\delta$  171.7, 149.8, 148.4, 139.0, 136.6, 131.0, 128.6, 128.3, 126.6, 121.0, 120.5, 120.3, 119.6, 118.4, 117.7, 116.4, 108.7, 104.4, 82.8, 55.7, 38.7, 38.4, 32.6, 27.8, 24.7, 24.5, 12.1; **HRMS** (ESI-TOF) Calcd for  $\text{C}_{31}\text{H}_{39}\text{BN}_3\text{O}_4$  [M+H] 527.3070, found 527.3071; **SFC** (chiral column) The enantiomeric ratio was determined by chiral SFC on Daicel IBN column (3  $\mu\text{m}$ , 4.6 $\times$ 250 mm), 25% MeOH/ $\text{CO}_2$ , 4.0 mL/min,  $\lambda = 250$  nm,  $t$  (major) = 3.164 min,  $t$  (minor) = 4.576 min; **X-ray** (single-crystal) Colorless plank crystals of X-ray diffraction quality were obtained by vapor diffusion of hexanes into a saturated solution of **4g** in EtOAc (CCDC 1888953).<sup>24</sup>

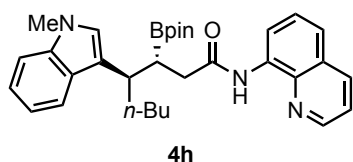

**(3R,4R)-4-(1-methyl-1H-indol-3-yl)-N-(quinolin-8-yl)-3-(4,4,5,5-tetramethyl-1,3,2-dioxaborolan-2-yl)octanamide (4h):** The title compound was prepared from **1f** (26.8 mg, 0.1 mmol), *N*-methylindole (39.2 mg, 0.3 mmol), and bis(pinacolato)diboron (101.6 mg, 0.4 mmol) according to the

general asymmetric carboboration procedure. Purification using silica gel column chromatography with 5:1 hexanes:EtOAc as the eluent gave the product as a light-yellow solid (29.9 mg, 57% yield, 94:6 *er*).  $[\alpha]_{\text{D}}^{20} = +9.6$  ( $c = 0.25$  Chloroform, 94:6 *er*).  $^1\text{H}$  NMR (500 MHz,  $\text{CDCl}_3$ )  $\delta$  9.68 (s, 1H), 8.79–8.68 (m, 2H), 8.12 (dd,  $J = 8.3, 1.7$  Hz, 1H), 7.66 (dt,  $J = 8.0, 1.0$  Hz, 1H), 7.54–7.35 (m, 3H), 7.21 (dt,  $J = 8.2, 0.9$  Hz, 1H), 7.14 (ddd,  $J = 8.1, 6.9, 1.1$  Hz, 1H), 7.03 (ddd,  $J = 8.0, 6.9, 1.1$  Hz, 1H), 6.97 (s, 1H), 3.72 (s, 3H), 3.19 (ddd,  $J = 9.9, 7.3, 4.3$  Hz, 1H), 2.73 (d,  $J = 8.2$  Hz, 2H), 2.07 (q,  $J = 7.7$  Hz, 1H), 1.92–1.70 (m, 2H), 1.32–1.21 (m, 4H), 1.05 (s, 6H), 0.97 (s, 6H), 0.82 (t,  $J = 6.8$  Hz, 3H).  $^{13}\text{C}$  NMR (125 MHz,  $\text{CDCl}_3$ )  $\delta$  172.3, 147.9, 138.3, 136.7, 136.2, 134.8, 128.5, 127.9, 127.4, 126.5, 121.4, 121.1, 120.9, 119.6, 118.4, 118.0, 116.3, 108.8, 82.9, 38.3, 36.9, 34.8, 32.6, 29.9, 24.8, 24.5, 22.9, 14.1; **HRMS** (ESI-TOF) Calcd for  $\text{C}_{32}\text{H}_{41}\text{BN}_3\text{O}_3$  [M+H] 525.3277, found 525.3281; **SFC** (chiral column) The enantiomeric ratio was determined by chiral SFC on a Daicel IB column (3  $\mu\text{m}$ , 4.6 $\times$ 250 mm), 35% MeOH/ $\text{CO}_2$ , 4.0 mL/min,  $\lambda = 241$  nm,  $t$  (major) = 1.578 min,  $t$  (minor) = 1.993 min.



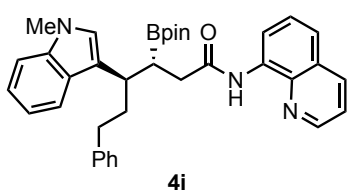

**(3*R*,4*R*)-4-(1-methyl-1*H*-indol-3-yl)-6-phenyl-*N*-(quinolin-8-yl)-3-(4,4,5,5-tetramethyl-1,3,2-dioxaborolan-2-yl)hexanamide (4i):**

The title compound was prepared from **1g** (31.6 mg, 0.1 mmol), *N*-methylindole (39.2 mg, 0.3 mmol), and bis(pinacolato)diboron (101.6 mg, 0.4 mmol) according to the general asymmetric carboboration procedure. Purification using silica gel column chromatography with 5:1 hexanes:EtOAc as the eluent gave the product as a yellow oil (29.2 mg, 51% yield, 94:6 *er*). <sup>1</sup>H NMR (400 MHz, CDCl<sub>3</sub>) δ 9.69 (s, 1H), 8.79–8.71 (m, 2H), 8.13 (dd, *J* = 8.3, 1.7 Hz, 1H), 7.67 (dt, *J* = 8.0, 1.0 Hz, 1H), 7.54–7.39 (m, 3H), 7.26–7.10 (m, 7H), 7.09–7.02 (m, 2H), 3.76 (s, 3H), 3.25 (ddd, *J* = 9.9, 7.2, 4.3 Hz, 1H), 2.79–2.50 (m, 4H), 2.31–2.04 (m, 3H), 1.06 (s, 6H), 0.97 (s, 6H); <sup>13</sup>C NMR (150 MHz, CDCl<sub>3</sub>) δ 172.1, 147.9, 142.9, 138.2, 136.7, 136.2, 134.7, 128.5, 128.4, 128.1, 127.8, 127.4, 126.5, 125.4, 121.4, 121.2, 120.9, 119.6, 118.5, 117.5, 116.3, 108.8, 82.9, 38.3, 37.0, 36.6, 34.0, 32.7, 27.2, 24.8, 24.5; HRMS (ESI-TOF) Calcd for C<sub>36</sub>H<sub>41</sub>BN<sub>3</sub>O<sub>3</sub> [M+H] 573.3277, found 573.3276; SFC (chiral column) The enantiomeric ratio was determined by chiral SFC on a Daicel IB column (3 μm, 4.6×250 mm), 35% MeOH/CO<sub>2</sub>, 4.0 mL/min, λ = 241 nm, t (major) = 2.273 min, t (minor) = 2.699 min.

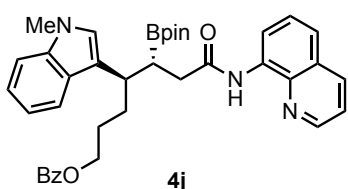

**(4*R*,5*R*)-4-(1-methyl-1*H*-indol-3-yl)-7-oxo-7-(quinolin-8-ylamino)-5-(4,4,5,5-tetramethyl-1,3,2-dioxaborolan-2-yl)heptyl benzoate (4j):**

The title compound was prepared from **1h** (37.5 mg, 0.1 mmol), *N*-methylindole (39.2 mg, 0.3 mmol), and bis(pinacolato)diboron (101.6 mg, 0.4 mmol) according to the general asymmetric carboboration procedure. Purification using silica gel chromatography with 5:1 hexanes:EtOAc as the eluent gave the product as a white solid (26.4 mg, 42% yield, 94:6 *er*). <sup>1</sup>H NMR (600 MHz, CDCl<sub>3</sub>) δ 9.68 (s, 1H), 8.81–8.69 (m, 2H), 8.13 (dd, *J* = 8.2, 1.6 Hz, 1H), 8.03–7.96 (m, 2H), 7.67 (d, *J* = 7.9 Hz, 1H), 7.56–7.36 (m, 6H), 7.23 (d, *J* = 8.2 Hz, 1H), 7.16 (ddd, *J* = 8.1, 7.0, 1.0 Hz, 1H), 7.04–6.99 (m, 2H), 4.27 (t, *J* = 6.5 Hz, 2H), 3.72 (s, 3H), 3.26 (ddd, *J* = 11.0, 7.1, 4.4 Hz, 1H), 2.79–2.69 (m, 2H), 2.17–2.03 (m, 2H), 1.95 (dtd, *J* = 13.3, 9.9, 9.5, 5.8 Hz, 1H), 1.75 (dtd, *J* = 13.2, 9.3, 4.5 Hz, 2H), 1.05 (s, 6H), 0.98 (s, 6H); <sup>13</sup>C NMR (150 MHz, CDCl<sub>3</sub>) δ 172.0, 166.6, 147.9, 138.3, 136.7, 136.2, 134.8, 132.7, 130.5, 129.5, 128.4, 128.2, 127.8, 127.4, 126.6, 121.4, 121.3, 121.0, 119.5, 118.6, 117.2, 116.3, 108.8, 83.0, 65.2, 38.2, 36.8, 32.7, 31.4, 27.1, 24.8, 24.5; HRMS (ESI-TOF) Calcd for C<sub>38</sub>H<sub>43</sub>BN<sub>3</sub>O<sub>5</sub> [M+H] 631.3332, found 631.3332; SFC (chiral column) The enantiomeric ratio was determined by chiral SFC on a Daicel IBN column (3 μm, 4.6×250 mm), 35% MeOH/CO<sub>2</sub>, 4.0 mL/min, λ = 241 nm, t (major) = 3.540 min, t (minor) = 4.849 min.

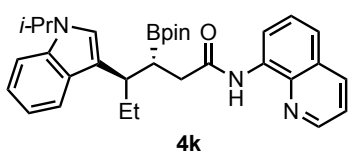

**(3*R*,4*R*)-4-(1-isopropyl-1*H*-indol-3-yl)-*N*-(quinolin-8-yl)-3-(4,4,5,5-tetramethyl-1,3,2-dioxaborolan-2-yl)hexanamide (4k):**

The title compound was prepared from **1d** (24.0 mg, 0.1 mmol), *N*-isopropylindole (47.8 mg, 0.3 mmol), and bis(pinacolato)diboron (101.6 mg, 0.4 mmol) according to the general asymmetric carboboration procedure. Purification using silica gel column chromatography with 5:1 hexanes:EtOAc as the eluent gave the product as a light-yellow solid (33.0 mg, 63% yield, 95:5 *er*). [α]<sub>D</sub><sup>20</sup> = +12.6 (c = 0.35 Chloroform, 95:5 *er*). <sup>1</sup>H NMR (600 MHz, CDCl<sub>3</sub>) δ 9.73 (s, 1H), 8.82–8.72 (m, 2H), 8.12 (dd, *J* = 8.2, 1.6 Hz, 1H), 7.66 (d, *J* = 7.9 Hz, 1H), 7.50 (t, *J* = 7.9 Hz, 1H), 7.47–7.38 (m, 2H), 7.29 (d, *J* = 8.2 Hz, 1H), 7.19–7.10 (m, 2H), 7.02 (t, *J* = 7.4 Hz, 1H), 4.63 (p, *J* = 6.7 Hz, 1H), 3.12 (td, *J* = 8.8, 4.3 Hz, 1H),

2.76 (qd,  $J = 15.2, 8.1$  Hz, 2H), 2.11 (ddd,  $J = 10.3, 8.3, 5.9$  Hz, 1H), 1.92 (ddd,  $J = 13.6, 7.3, 4.4$  Hz, 1H), 1.82–1.75 (m, 1H), 1.51 (dd,  $J = 8.5, 6.7$  Hz, 6H), 0.99 (s, 6H), 0.95 (s, 6H), 0.83 (t,  $J = 7.3$  Hz, 3H);  $^{13}\text{C}$  NMR (150 MHz,  $\text{CDCl}_3$ )  $\delta$  172.2, 147.9, 138.3, 136.2, 135.5, 134.8, 128.7, 127.9, 127.5, 121.4, 121.4, 121.0, 120.8, 119.7, 118.3, 117.8, 116.4, 109.0, 82.8, 46.7, 38.8, 38.7, 27.8, 24.7, 24.6, 22.9, 22.8, 11.9; HRMS (ESI-TOF) Calcd for  $\text{C}_{32}\text{H}_{41}\text{BN}_3\text{O}_3$  [M+H] 525.3277, found 525.3276; SFC (chiral column) The enantiomeric ratio was determined by chiral SFC on a Daicel IBN column (3  $\mu\text{m}$ , 4.6 $\times$ 250 mm), 30% MeOH/ $\text{CO}_2$ , 4.0 mL/min,  $\lambda = 298$  nm,  $t$  (major) = 1.754 min,  $t$  (minor) = 2.374 min.

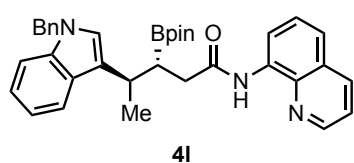

**(3*R*,4*R*)-4-(1-benzyl-1*H*-indol-3-yl)-*N*-(quinolin-8-yl)-3-(4,4,5,5-tetramethyl-1,3,2-dioxaborolan-2-yl)pentanamide (4i):**

The title compound was prepared from **1c** (22.6 mg, 0.1 mmol), *N*-benzylindole (62.2mg, 0.3 mmol), and bis(pinacolato)diboron (101.6 mg, 0.4 mmol) according to the general asymmetric carboboration procedure. Purification using silica gel chromatography with 9:1 hexanes:acetone as the eluent gave the product as a light-green oil (33.5 mg, 60% yield, 92:8 *er*).  $^1\text{H}$  NMR (600 MHz,  $\text{CDCl}_3$ )  $\delta$  9.69 (s, 1H), 8.78–8.68 (m, 2H), 8.12 (dd,  $J = 8.3, 1.7$  Hz, 1H), 7.71 (d,  $J = 7.9$  Hz, 1H), 7.49 (t,  $J = 7.9$  Hz, 1H), 7.44 (dd,  $J = 8.2, 1.4$  Hz, 1H), 7.41 (dd,  $J = 8.3, 4.2$  Hz, 1H), 7.28 (dd,  $J = 8.1, 6.6$  Hz, 2H), 7.24–7.17 (m, 2H), 7.15–7.09 (m, 3H), 7.08–7.03 (m, 2H), 5.25 (s, 2H), 3.45 (t,  $J = 6.9$  Hz, 1H), 2.76 (dd,  $J = 15.2, 10.7$  Hz, 1H), 2.67 (dd,  $J = 15.2, 5.4$  Hz, 1H), 2.14–2.04 (m, 1H), 1.43 (d,  $J = 7.1$  Hz, 3H), 1.09 (s, 6H), 1.02 (s, 6H);  $^{13}\text{C}$  NMR (150 MHz,  $\text{CDCl}_3$ )  $\delta$  172.2, 147.9, 138.3, 137.9, 136.5, 136.2, 134.8, 128.6, 127.8, 127.8, 127.4, 127.4, 126.8, 125.3, 121.5, 121.4, 120.9, 120.6, 119.7, 118.7, 116.3, 109.4, 83.0, 49.9, 37.3, 31.1, 24.8, 24.5, 20.3; HRMS (ESI-TOF) Calcd for  $\text{C}_{35}\text{H}_{39}\text{BN}_3\text{O}_3$  [M+H] 559.3121, found 559.3123; SFC (chiral column) The enantiomeric ratio was determined by chiral SFC on a Daicel IBN column (3  $\mu\text{m}$ , 4.6 $\times$ 250 mm), 30% MeOH/ $\text{CO}_2$ , 4.0 mL/min,  $\lambda = 295$  nm,  $t$  (major) = 3.982 min,  $t$  (minor) = 5.630 min.

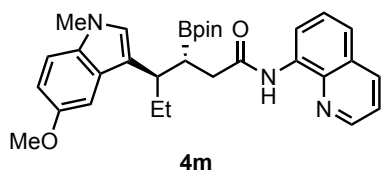

**(3*R*,4*R*)-4-(5-methoxy-1-methyl-1*H*-indol-3-yl)-*N*-(quinolin-8-yl)-3-(4,4,5,5-tetramethyl-1,3,2-dioxaborolan-2-yl)hexanamide (4m):**

The title compound was prepared from **1d** (24.0 mg, 0.1 mmol), 5-methoxy-*N*-methylindole (48.4 mg, 0.3 mmol), and bis(pinacolato)diboron (101.6 mg, 0.4 mmol) according to the general asymmetric carboboration procedure. Purification using silica gel column chromatography with 5:1 hexanes:EtOAc as the eluent gave the product as a colorless oil (44.7 mg, 85% yield, 93:7 *er*).  $^1\text{H}$  NMR (600 MHz,  $\text{CDCl}_3$ )  $\delta$  9.68 (s, 1H), 8.82–8.69 (m, 2H), 8.12 (dd,  $J = 8.2, 1.6$  Hz, 1H), 7.53–7.38 (m, 3H), 7.13–7.03 (m, 2H), 6.97 (s, 1H), 6.79 (dd,  $J = 8.8, 2.4$  Hz, 1H), 3.76 (s, 3H), 3.70 (s, 3H), 3.07 (td,  $J = 8.7, 4.3$  Hz, 1H), 2.74 (dd,  $J = 8.1, 6.3$  Hz, 2H), 2.08 (dt,  $J = 9.4, 7.2$  Hz, 1H), 1.92 (ddd,  $J = 13.5, 7.2, 4.4$  Hz, 1H), 1.75 (dtd,  $J = 13.6, 7.1, 2.1$  Hz, 1H), 1.04 (s, 6H), 0.98 (s, 6H), 0.86 (t,  $J = 7.3$  Hz, 3H);  $^{13}\text{C}$  NMR (150 MHz,  $\text{CDCl}_3$ )  $\delta$  172.2, 153.4, 147.9, 138.2, 136.2, 134.8, 132.0, 128.9, 127.8, 127.4, 127.2, 121.4, 120.9, 117.1, 116.2, 111.3, 109.4, 101.3, 82.9, 55.9, 38.5, 38.4, 32.8, 27.9, 24.8, 24.5, 12.1; HRMS (ESI-TOF) Calcd for  $\text{C}_{31}\text{H}_{39}\text{BN}_3\text{O}_4$  [M+H] 527.3070, found 527.3070; SFC (chiral column) The enantiomeric ratio was determined by chiral SFC on a Daicel IBN column (3  $\mu\text{m}$ , 4.6 $\times$ 250 mm), 30% MeOH/ $\text{CO}_2$ , 4.0 mL/min,  $\lambda = 305$  nm,  $t$  (major) = 2.022 min,  $t$  (minor) = 2.753 min.

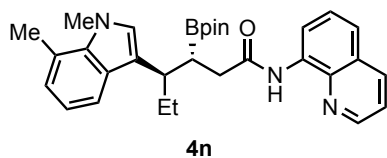

**(3R,4R)-4-(1,7-dimethyl-1H-indol-3-yl)-N-(quinolin-8-yl)-3-(4,4,5,5-tetramethyl-1,3,2-dioxaborolan-2-yl)hexanamide (4n):** The title compound was prepared from **1d** (24.0 mg, 0.1 mmol), 7-methyl-*N*-methylindole (43.6 mg, 0.3 mmol), and bis(pinacolato)diboron (101.6 mg, 0.4 mmol)

according to the general asymmetric carboboration procedure. Purification using silica gel column chromatography with 5:1 hexanes:EtOAc as the eluent gave the product as a light-yellow solid (43.3 mg, 85% yield, 93:7 *er*). <sup>1</sup>H NMR (600 MHz, CDCl<sub>3</sub>) δ 9.69 (s, 1H), 8.82–8.73 (m, 2H), 8.15 (dd, *J* = 8.2, 1.6 Hz, 1H), 7.54–7.42 (m, 4H), 6.90 (d, *J* = 8.1 Hz, 2H), 6.84 (d, *J* = 7.0 Hz, 1H), 4.01 (s, 3H), 3.14 (ddd, *J* = 9.4, 7.2, 4.3 Hz, 1H), 2.79–2.67 (m, 5H), 2.13–2.08 (m, 1H), 1.92 (ddq, *J* = 14.8, 7.5, 3.1 Hz, 1H), 1.80 (ddd, *J* = 13.6, 9.4, 7.1 Hz, 1H), 1.11 (s, 6H), 1.05 (s, 6H), 0.89 (t, *J* = 7.3 Hz, 3H); <sup>13</sup>C NMR (150 MHz, CDCl<sub>3</sub>) δ 172.3, 147.9, 138.3, 136.2, 135.4, 134.8, 129.7, 128.3, 127.9, 127.4, 123.8, 121.4, 120.9, 120.7, 118.7, 117.6, 117.2, 116.3, 83.0, 38.4, 38.2, 36.6, 27.6, 24.8, 24.5, 19.7, 12.2; **HRMS** (ESI-TOF) Calcd for C<sub>31</sub>H<sub>39</sub>BN<sub>3</sub>O<sub>3</sub> [M+H] 511.3121, found 511.3127; **SFC** (chiral column) The enantiomeric ratio was determined by chiral SFC on a Daicel IBN column (3 μm, 4.6×250 mm), 30% MeOH/CO<sub>2</sub>, 4.0 mL/min, λ = 298 nm, t (major) = 2.063 min, t (minor) = 2.883 min.

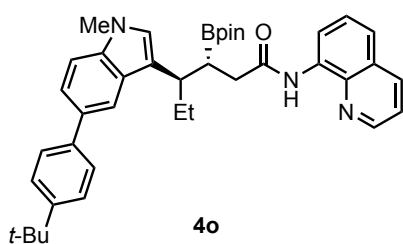

**(3R,4R)-4-(5-(4-(*tert*-butyl)phenyl)-1-methyl-1H-indol-3-yl)-N-(quinolin-8-yl)-3-(4,4,5,5-tetramethyl-1,3,2-dioxaborolan-2-yl)hexanamide (4o):** The title compound was prepared from **1d** (24.0 mg, 0.1 mmol), 5-(4-(*tert*-butyl)phenyl)-*N*-methylindole (79.0 mg, 0.3 mmol), and bis(pinacolato)diboron (101.6 mg, 0.4 mmol) according to the general asymmetric carboboration procedure.

Purification using silica gel column chromatography with 5:1 hexanes:EtOAc as the eluent gave the product as a yellow oil (34.5 mg, 55% yield, 92:8 *er*). <sup>1</sup>H NMR (600 MHz, CDCl<sub>3</sub>) δ 9.71 (s, 1H), 8.78 (d, *J* = 7.7 Hz, 1H), 8.71 (d, *J* = 4.1 Hz, 1H), 8.12 (d, *J* = 8.2 Hz, 1H), 7.81 (s, 1H), 7.51 (dd, *J* = 16.8, 8.0 Hz, 3H), 7.45 (d, *J* = 8.3 Hz, 1H), 7.42–7.37 (m, 2H), 7.33 (d, *J* = 7.9 Hz, 2H), 7.24 (s, 1H), 7.02 (s, 1H), 3.75 (s, 3H), 3.17 (td, *J* = 8.7, 4.3 Hz, 1H), 2.82–2.71 (m, 2H), 2.11 (q, *J* = 8.0 Hz, 1H), 1.94 (dq, *J* = 13.0, 6.5 Hz, 1H), 1.81 (dq, *J* = 14.3, 7.5 Hz, 1H), 1.34 (s, 9H), 1.04 (s, 6H), 0.98 (s, 6H), 0.87 (t, *J* = 7.3 Hz, 3H); <sup>13</sup>C NMR (150 MHz, CDCl<sub>3</sub>) δ 172.2, 148.8, 147.9, 139.9, 138.3, 136.1, 136.0, 134.8, 131.8, 129.2, 127.8, 127.4, 127.2, 127.0, 125.4, 121.4, 120.9, 120.9, 118.2, 117.9, 116.3, 108.9, 82.9, 38.5, 38.5, 34.4, 32.8, 31.4, 28.1, 24.8, 24.5, 12.2; **HRMS** (ESI-TOF) Calcd for C<sub>40</sub>H<sub>49</sub>BN<sub>3</sub>O<sub>3</sub> [M+H] 629.3903, found 629.3903; **SFC** (chiral column) The enantiomeric ratio was determined by chiral SFC on a Daicel IBN column (3 μm, 4.6×250 mm), 25% MeOH/CO<sub>2</sub>, 4.0 mL/min, λ = 300 nm, t (major) = 4.003 min, t (minor) = 5.914 min.

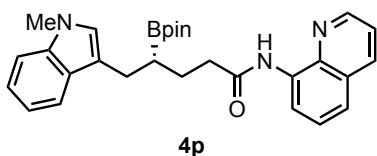

**(R)-5-(1-methyl-1H-indol-3-yl)-N-(quinolin-8-yl)-4-(4,4,5,5-tetramethyl-1,3,2-dioxaborolan-2-yl)pentanamide (4p):** The title compound was prepared from **1i** (22.6 mg, 0.1 mmol), *N*-methylindole (39.2 mg, 0.3 mmol), and bis(pinacolato)diboron (101.6 mg, 0.4 mmol) according to the

general asymmetric carboboration procedure. Purification using silica gel column chromatography with 5:1 hexanes:EtOAc as the eluent gave the product as a yellow oil (36.7 mg, 76% yield, 76:24 *er*). **SFC** (chiral column) The enantiomeric ratio was determined by chiral SFC on a Daicel IBN column (3 μm, 4.6×250 mm), 25% MeOH/CO<sub>2</sub>, 4.0 mL/min, λ = 241 nm, t (minor) = 4.982 min, t (major) = 5.271 min.

## Unsuccessful Non-Indole Carbon Nucleophiles

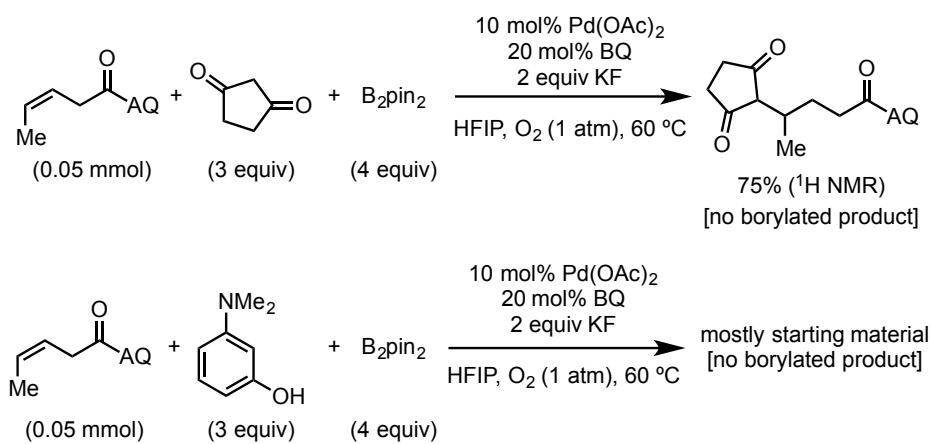

**Scheme S12:** Unsuccessful carbon nucleophiles for carboboration reaction.

a)                      b)                      c)                      d)

### Large-Scale Synthesis and Recrystallization

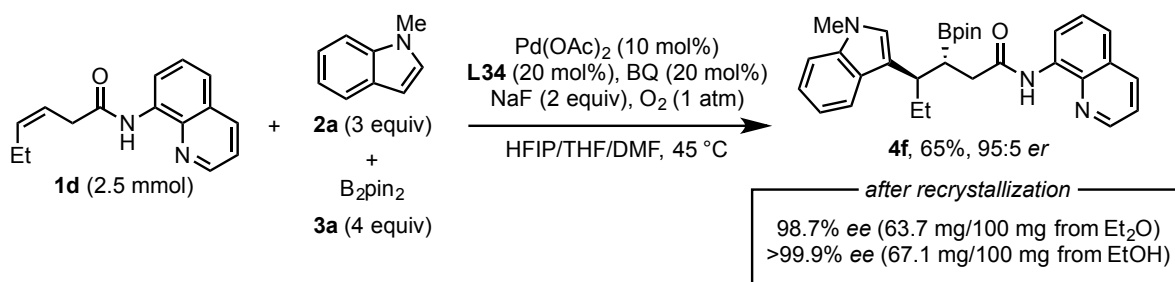

**Scheme S13:** Large-Scale Synthesis of Chiral Boronate **4f**.

**Procedure for Large-Scale Synthesis and Recrystallization of 4f:** Alkene substrate **1b** (600 mg, 2.5 mmol), *N*-methylindole (980 mg, 7.5 mmol), bis(pinacolato)diboron (2.54 g, 10 mmol),  $\text{Pd}(\text{OAc})_2$  (55 mg, 0.25 mmol), **L34** (214 g, 0.5 mmol), benzoquinone (55 mg, 0.5 mmol), and NaF (210 mg, 5 mmol) were added to a 500-mL Schlenk flask. The reaction flask was sealed with a rubber septum and was then evacuated and backfilled with  $\text{O}_2$  ( $\times 3$ ). Under positive  $\text{O}_2$  pressure HFIP/THF/DMF (5 mL, 2:2:1, v/v/v) was added. The flask was submerged into a silicon oil bath that was pre-heated to 45 °C. After 5 days, the dark brown reaction mixture was cooled to room temperature, diluted with EtOAc (10 mL) and washed with brine (20 mL). The organic layer was dried over  $\text{Na}_2\text{SO}_4$  and concentrated to afford a brown residue that upon purification by rapid silica gel column chromatography—with a residence time less than 20 min to prevent alkyl boronate decomposition—afforded **4f** (809 mg, 65%, 95:5 *er*) as a light-yellow solid. Analytical data was consistent with the information reported above.

**Recrystallization:** A sample of **4f** (100 mg) was dissolved in a minimum volume of  $\text{Et}_2\text{O}$  or EtOH to afford a saturated solution in a 4-dram vial. The organic solvent was slowly evaporated until small amount of crystals precipitated. The vial was placed in a 4 °C refrigerator for 2 days and the recrystallized product **4f** (63.7 mg, 98.7% *ee* from  $\text{Et}_2\text{O}$ ; 67.1 mg, >99% *ee* from EtOH) was collected by filtration.

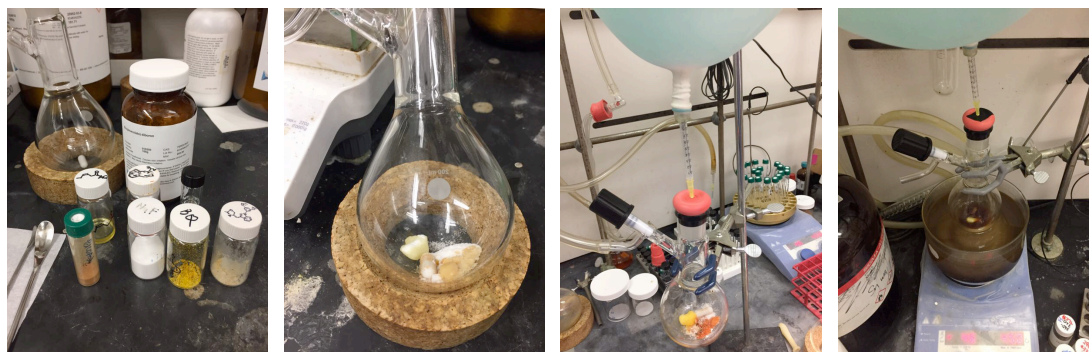

**Figure S1:** Photographic depiction of the procedure for gram-scale synthesis of **4f**.

a) Reagents. b) Adding reagents to Schlenk flask. c) Degassing and back-filling with  $\text{O}_2$ . d) Heating in oil bath.

## Procedures for Transformations of Borylated Products

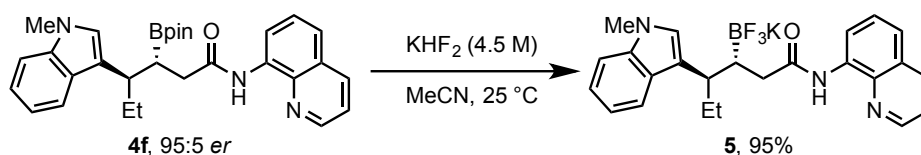

**Scheme S14:** Synthesis of potassium trifluoroborate salt **5**.

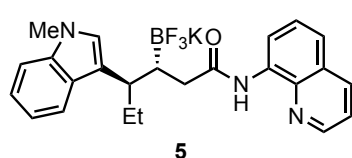

### (3*R*,4*R*)-4-(1-methyl-1*H*-indol-3-yl)-*N*-(quinolin-8-yl)-3-(trifluoro- $\lambda^4$ -boraneyl)hexanamide, potassium salt (**5**):

The title compound was prepared by adapting a literature procedure.<sup>25</sup> In a 15-mL reaction tube containing a Teflon-coated magnetic stir bar, the borylated compound **4f** (49.8 mg, 0.1 mmol) was dissolved in MeCN (0.2 mL), and saturated aq. KHF<sub>2</sub> (4.5 M, 0.09 mL, 4 equiv) was added. The reaction mixture was stirred for 5 h, concentrated, and azeotroped with EtOH ( $\times 3$ ). The resulting material was then placed on the high vacuum for 6 h. The crude product was extracted with hot acetone, filtered and then concentrated. Et<sub>2</sub>O (3 mL) was added to the crude material, and the mixture was sonicated for 30 min. After removal of the solvent, the trifluoroborate salt was achieved as a pale-yellow solid (45.4 mg, 95% yield). <sup>1</sup>H NMR (500 MHz, CDCl<sub>3</sub>)  $\delta$  9.46 (s, 1H), 8.51 (d,  $J$  = 8.3 Hz, 2H), 7.92 (d,  $J$  = 8.3 Hz, 1H), 7.70–7.57 (m, 1H), 7.29 (d,  $J$  = 8.1 Hz, 1H), 7.23 (d,  $J$  = 11.1 Hz, 2H), 7.11 (d,  $J$  = 8.2 Hz, 1H), 7.05 (t,  $J$  = 7.5 Hz, 1H), 6.91 (t,  $J$  = 7.4 Hz, 1H), 6.77 (s, 1H), 3.52 (s, 3H), 3.04 (s, 1H), 2.34 (d,  $J$  = 11.7 Hz, 2H), 1.83 (s, 1H), 1.56 (s, 1H), 1.38 (s, 1H), 0.73 (t,  $J$  = 7.2 Hz, 3H); <sup>13</sup>C NMR (150 MHz, CDCl<sub>3</sub>)  $\delta$  176.1, 147.8, 138.2, 136.9, 135.8, 134.6, 128.5, 127.7, 127.3, 126.4, 121.2, 120.7, 120.7, 119.9, 119.3, 118.0, 116.0, 108.8, 39.1, 37.5, 32.3, 24.8, 24.8, 13.1; <sup>19</sup>F NMR (376 MHz, CDCl<sub>3</sub>)  $\delta$  -140.4 (s, 3F).

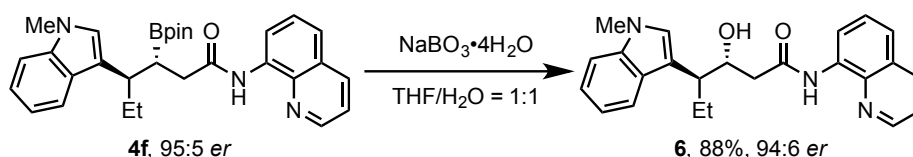

**Scheme S15:** Oxidation of chiral boronate **4f**.

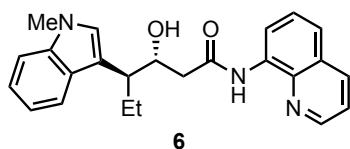

### (3*R*,4*S*)-3-hydroxy-4-(1-methyl-1*H*-indol-3-yl)-*N*-(quinolin-8-yl)hexanamide (**6**):

The title compound was prepared by adapting a literature procedure.<sup>26</sup> To a reaction tube containing **4f** (49.8 mg, 0.1 mmol), were added NaBO<sub>3</sub>·4H<sub>2</sub>O (77 mg, 0.5 mmol), THF (0.5 mL) and H<sub>2</sub>O (0.5 mL). The resulting mixture was allowed to stir at room temperature for 3 h. The aqueous layer was washed with Et<sub>2</sub>O (5 mL,  $\times 2$ ). The combined organic extracts were dried over Na<sub>2</sub>SO<sub>4</sub>, filtered, and concentrated under vacuum. Purification by preparative TLC (1.5:1 hexanes:EtOAc) gave the product as a white solid (34.1 mg, 88%, 94:6 *er*). <sup>1</sup>H NMR (600 MHz, CDCl<sub>3</sub>)  $\delta$  10.03 (s, 1H), 8.79–8.69 (m, 2H), 8.13 (dd,  $J$  = 8.2, 1.7 Hz, 1H), 7.67 (dt,  $J$  = 8.1, 0.9 Hz, 1H), 7.54–7.47 (m, 2H), 7.41 (dd,  $J$  = 8.2, 4.2 Hz, 1H), 7.31 (dt,  $J$  = 8.3, 0.9 Hz, 1H), 7.22 (ddd,  $J$  = 8.1, 6.9, 1.1 Hz, 1H), 7.10 (ddd,  $J$  = 8.0, 7.0, 1.0 Hz, 1H), 7.05 (s, 1H), 4.54 (ddd,  $J$  = 9.5, 4.7, 2.8 Hz, 1H), 3.78 (s, 3H), 3.21 (s, 1H), 3.00 (dt,  $J$  = 9.9, 5.0 Hz, 1H), 2.74 (dd,  $J$  = 15.4, 2.8 Hz, 1H), 2.62 (dd,  $J$  = 15.4, 9.4 Hz, 1H), 1.99 (ddd,  $J$  = 13.0, 7.3, 5.3 Hz, 1H), 1.93–1.82 (m,

1H), 0.91 (t,  $J = 7.4$  Hz, 3H);  $^{13}\text{C}$  NMR (150 MHz,  $\text{CDCl}_3$ )  $\delta$  171.4, 148.3, 138.6, 137.1, 136.4, 134.6, 128.6, 128.1, 127.7, 127.4, 121.7, 121.7, 121.6, 119.5, 119.0, 116.9, 113.4, 109.4, 71.3, 44.6, 43.1, 32.9, 25.6, 12.8; HRMS (ESI-TOF) Calcd for  $\text{C}_{24}\text{H}_{26}\text{N}_3\text{O}_2$  [M+H] 388.2025, found 388.2023; SFC (chiral column) The enantiomeric ratio was determined by chiral SFC on a Daicel IBN column (3  $\mu\text{m}$ , 4.6 $\times$ 250 mm), 35% MeOH/ $\text{CO}_2$ , 4.0 mL/min,  $\lambda = 241$  nm,  $t$  (major) = 3.573 min,  $t$  (minor) = 4.196 min.

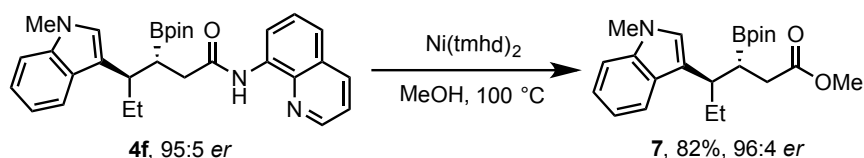

**Scheme S16:** Methanolysis of the 8-amionquinoline (AQ) amide.

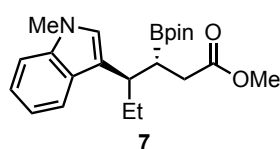

**methyl (3R,4R)-4-(1-methyl-1H-indol-3-yl)-3-(4,4,5,5-tetramethyl-1,3,2-dioxaborolan-2-yl)hexanoate (7):** The title compound was prepared by adapting a literature procedure.<sup>27</sup> To a 15-mL reaction tube containing a Teflon-coated magnetic stir bar, were added compound **4f** (99.6 mg, 0.2 mmol), and  $\text{Ni(tmhd)}_2$  (128 mg, 0.3 mmol). The reaction vessel was evacuated and backfilled with  $\text{N}_2$  ( $\times 3$ ), followed by addition of anhydrous MeOH (2 mL). The reaction mixture was heated at 100  $^\circ\text{C}$  for 6 days. After cooling to room temperature, the reaction was diluted with EtOAc (5 mL) and filtered through a plug of celite with EtOAc as the eluent. The resulting solution was concentrated under vacuum and purified by preparative TLC (4:1 hexanes:EtOAc) to afford the product as a colorless oil (7.1 mg, 55% yield, 96:4 *er*).  $^1\text{H}$  NMR (600 MHz,  $\text{CDCl}_3$ )  $\delta$  7.62 (dt,  $J = 7.9$ , 0.9 Hz, 1H), 7.24 (dt,  $J = 8.2$ , 0.9 Hz, 1H), 7.17 (ddd,  $J = 8.1$ , 6.9, 1.1 Hz, 1H), 7.06 (ddd,  $J = 7.9$ , 6.9, 1.1 Hz, 1H), 6.89 (s, 1H), 3.73 (s, 3H), 3.59 (s, 3H), 3.02 (ddd,  $J = 9.6$ , 7.7, 4.1 Hz, 1H), 2.54–2.40 (m, 2H), 1.90–1.76 (m, 2H), 1.68 (ddd,  $J = 13.5$ , 9.7, 7.3 Hz, 1H), 1.04 (s, 6H), 0.97 (s, 6H), 0.82 (t,  $J = 7.3$  Hz, 3H);  $^{13}\text{C}$  NMR (150 MHz,  $\text{CDCl}_3$ )  $\delta$  174.6, 136.7, 128.3, 126.4, 121.2, 119.5, 118.4, 117.4, 108.8, 82.9, 51.3, 38.3, 34.0, 32.6, 27.0, 24.8, 24.4, 12.0; HRMS (ESI-TOF) Calcd for  $\text{C}_{22}\text{H}_{33}\text{BNO}_4$  [M+H] 385.2539, found 385.2532; SFC (chiral column) The enantiomeric ratio was determined by chiral SFC on a Daicel IG column (3  $\mu\text{m}$ , 4.6 $\times$ 250 mm), 3% *i*-PrOH /  $\text{CO}_2$ , 4.0 mL/min,  $\lambda = 222$  nm,  $t$  (minor) = 3.987 min,  $t$  (major) = 4.442 min.

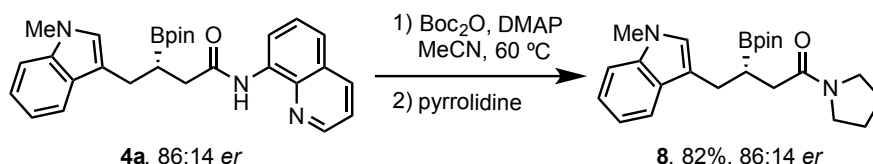

**Scheme S17:** Transamidation of the 8-amionquinoline (AQ) amide.

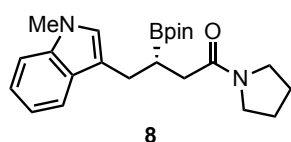

**(S)-4-(1-methyl-1H-indol-3-yl)-1-(pyrrolidin-1-yl)-3-(4,4,5,5-tetramethyl-1,3,2-dioxaborolan-2-yl)butan-1-one (8):** The title compound was prepared by adapting a literature procedure.<sup>28</sup>

**Boc Protection:** To a 25-mL round-bottom flask containing a Teflon-coated magnetic stir bar, were added compound **4a** (235 mg,

0.5 mmol), 4-(dimethylamino)pyridine (6.1 mg, 0.05 mmol) and Boc anhydride (218 mg, 1 mmol). The reaction flask was evacuated and backfilled with N<sub>2</sub> (×1), followed by addition of anhydrous MeCN (5 mL). The reaction mixture was heated at 60 °C for 2 hours. After cooling to room temperature, the reaction was concentrated under vacuum and purified by column chromatography (2:1 hexanes:EtOAc) to afford the Boc-protected amide as a light yellow solid.

*Aminolysis:* To a 4-dram vial equipped with a Teflon-coated magnetic stir bar, were added pyrrolidine (65 μL, 0.75 mmol) and toluene (1 mL). The reaction mixture was heated under N<sub>2</sub> atmosphere at 60 °C overnight. After cooling to room temperature, the reaction was concentrated under vacuum and purified by column chromatography (1:2 hexanes:EtOAc) to afford amide **8** as a colorless oil (162 mg, 82% yield, 86:14 *er*). <sup>1</sup>H NMR (600 MHz, CDCl<sub>3</sub>) δ 7.61 (d, *J* = 7.9 Hz, 1H), 7.25 (d, *J* = 8.6 Hz, 1H), 7.18 (t, *J* = 7.6 Hz, 1H), 7.05 (t, *J* = 7.4 Hz, 1H), 6.85 (s, 1H), 3.72 (s, 3H), 3.46 (t, *J* = 6.8 Hz, 2H), 3.18 (t, *J* = 6.6 Hz, 2H), 3.02 (dd, *J* = 15.0, 5.2 Hz, 1H), 2.71 (dd, *J* = 15.0, 10.7 Hz, 1H), 2.43 (dd, *J* = 16.9, 6.8 Hz, 1H), 2.30 (dd, *J* = 16.6, 8.0 Hz, 1H), 1.89–1.73 (m, 4H), 1.70–1.57 (m, 1H), 1.25 (d, *J* = 8.7 Hz, 12H); <sup>13</sup>C NMR (150 MHz, CDCl<sub>3</sub>) δ 173.6, 137.0, 128.4, 126.6, 121.2, 119.4, 118.3, 115.4, 108.9, 81.9, 46.6, 46.0, 36.4, 32.6, 25.8, 25.4, 25.0, 25.0, 24.4; SFC (chiral column) The enantiomeric ratio was determined by chiral SFC on a Daicel IG column (3 μm, 4.6×250 mm), 30% MeOH/CO<sub>2</sub>, 4.0 mL/min, λ = 224 nm, t (minor) = 1.722 min, t (major) = 2.073 min.



## Determination of Absolute Stereochemistry of **4a** by Mosher Ester Analysis

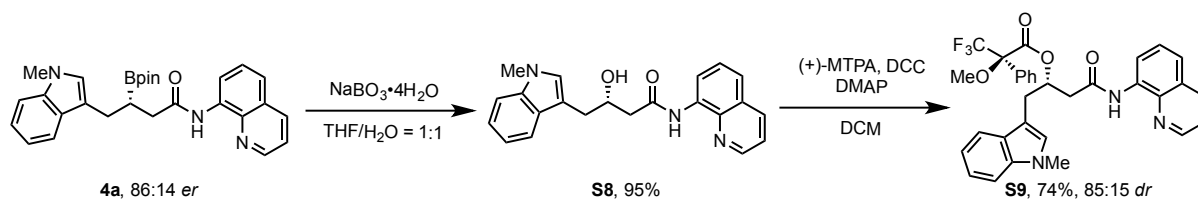

**Scheme S18:** Synthesis of Mosher ester **S9**.

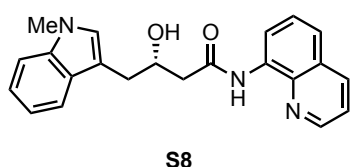

**(S)-3-hydroxy-4-(1-methyl-1*H*-indol-3-yl)-*N*-(quinolin-8-yl)butanamide (S8):** The title compound was prepared from **4a** (31.8 mg, 0.068 mmol), and NaBO<sub>3</sub>·4H<sub>2</sub>O (83.5 mg, 0.54 mmol) according to the previously described procedure.<sup>26</sup>

Purification using silica gel column chromatography with 1:1 hexanes:EtOAc as the eluent gave the product as a white solid (23.1 mg, 95% yield). <sup>1</sup>H NMR (600 MHz, CDCl<sub>3</sub>) δ 10.06 (s, 1H), 8.92–8.59 (m, 2H), 8.14 (dd, *J* = 8.2, 1.7 Hz, 1H), 7.66 (d, *J* = 7.9 Hz, 1H), 7.58–7.47 (m, 2H), 7.43 (dd, *J* = 8.2, 4.2 Hz, 1H), 7.31 (d, *J* = 8.2 Hz, 1H), 7.26–7.22 (m, 1H), 7.13 (t, *J* = 7.4 Hz, 1H), 7.00 (s, 1H), 4.53 (d, *J* = 7.6 Hz, 1H), 3.77 (s, 3H), 3.56 (s, 1H), 3.19–2.95 (m, 2H), 2.81 (dd, *J* = 15.4, 3.1 Hz, 1H), 2.74 (dd, *J* = 15.4, 8.6 Hz, 1H); <sup>13</sup>C NMR (150 MHz, CDCl<sub>3</sub>) δ 171.0, 148.2, 138.4, 137.1, 136.3, 134.3, 128.1, 128.0, 127.8, 127.3, 121.8, 121.7, 121.6, 119.1, 119.0, 116.8, 110.1, 109.3, 77.3, 77.0, 76.8, 69.0, 43.6, 32.8, 32.7.

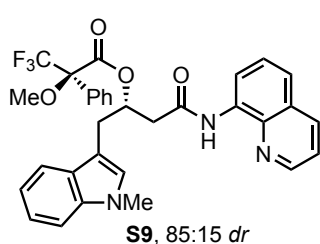

**(S)-1-(1-methyl-1*H*-indol-3-yl)-4-oxo-4-(quinolin-8-ylamino)butan-2-yl (R)-3,3,3-trifluoro-2-methoxy-2-phenylpropanoate (S9):** The title compound was prepared by adapting a literature procedure.<sup>29</sup> Under a N<sub>2</sub> atmosphere, (*R*)-(+)- $\alpha$ -methoxy- $\alpha$ -(trifluoromethyl)phenylacetic acid (Mosher's acid, 15 mg, 0.064 mmol) was dissolved in anhydrous DCM (0.62 mL), and the mixture was cooled to 0 °C. Subsequent addition of DCC

(15 mg, 0.073 mmol) was followed by stirring for 15 min, at which time a solution of alcohol **S8** (20.8 mg, 0.058 mmol) in DCM (0.65 mL) and a catalytic amount of 4-(dimethylamino)pyridine were added. The reaction mixture was stirred at room temperature overnight. After the reaction had reacted completion, the resulting suspension was filtered through a plug of celite, and the filtrate was concentrated under vacuum. Purification by preparative TLC (3:1 hexanes:EtOAc) gave the product as a colorless oil (24.8 mg, 74% yield, 85:15 *dr*). The reported *dr* was determined by <sup>1</sup>H NMR analysis of purified **S9** and is consistent with that of the crude reaction mixture. The following analytical data correspond to the mixture. <sup>1</sup>H NMR (400 MHz, CDCl<sub>3</sub>) δ 9.70 (s, 0.15H), 9.62 (s, 0.85H), 8.70 (dtd, *J* = 9.1, 6.5, 6.1, 3.5 Hz, 2H), 8.15 (dd, *J* = 8.3, 1.6 Hz, 1H), 7.73 (d, *J* = 7.9 Hz, 0.85H), 7.69 (d, *J* = 7.9 Hz, 0.15H), 7.57–7.33 (m, 5H), 7.29 (d, *J* = 8.1 Hz, 1H), 7.25–6.99 (m, 5H), 6.96 (s, 0.85H), 6.68 (s, 0.15H), 6.02 (tt, *J* = 7.3, 5.7 Hz, 1H), 3.72 (s, 2.55H), 3.68 (s, 0.45H), 3.45 (s, 3H), 3.43–3.31 (m, 1H), 3.22 (dd, *J* = 14.4, 7.6 Hz, 0.85H), 3.05 (dd, *J* = 14.4, 8.0 Hz, 0.15H), 2.96–2.78 (m, 2H); <sup>19</sup>F NMR (376 MHz, CDCl<sub>3</sub>) δ -71.4 (s, 0.45 F), -72.0 (s, 2.55 F). The absolute configurations of compound **4a** and alcohol **S8** were assigned as (*S*) by <sup>1</sup>H NMR analysis according to the literature.<sup>30</sup>

## Mechanistic Studies of Alkene *E/Z* Isomerization

**Table S5.** Investigation of Alkene Substrate *E/Z* Isomerization.

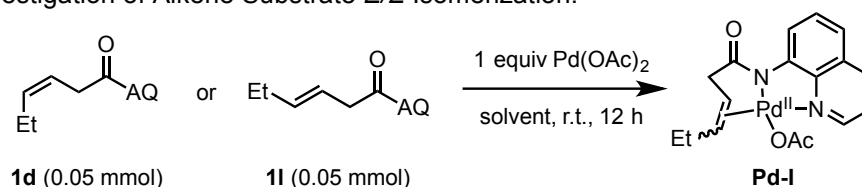

| Entry | Substrate | Solvent                   | <b>L34</b> | Pd complex <i>Z/E</i>    |
|-------|-----------|---------------------------|------------|--------------------------|
| 1     | <b>1d</b> | MeCN                      | w/o        | >20:1                    |
| 2     | <b>1d</b> | MeCN                      | w          | >20:1                    |
| 3     | <b>1l</b> | MeCN                      | w/o        | 1.6:1                    |
| 4     | <b>1l</b> | MeCN                      | w          | >20:1                    |
| 5     | <b>1d</b> | MeOH                      | w/o        | >20:1                    |
| 6     | <b>1d</b> | MeOH                      | w          | >20:1                    |
| 7     | <b>1l</b> | MeOH                      | w/o        | 7.4:1 (1:3) <sup>a</sup> |
| 8     | <b>1l</b> | MeOH                      | w          | >20:1                    |
| 9     | <b>1d</b> | HFIP/THF/DMF <sup>b</sup> | w/o        | 17:1                     |
| 10    | <b>1d</b> | HFIP/THF/DMF <sup>b</sup> | w          | >20:1                    |
| 11    | <b>1l</b> | HFIP/THF/DMF <sup>b</sup> | w/o        | 1.2:1                    |
| 12    | <b>1l</b> | HFIP/THF/DMF <sup>b</sup> | w          | 10:1                     |

<sup>a</sup>The ratio in parentheses is the product ratio of a trial that was stopped after 3 h. <sup>b</sup>HFIP/THF/DMF = 2:2:1

**General Procedure for Palladium Complex formation:** Alkene substrate (12 mg, 0.05 mmol), Pd(OAc)<sub>2</sub> (11 mg, 0.05 mmol), and solvent (0.2 mL) were added to a 1-dram vial. The reaction mixture was stirred at room temperature for 12 hours under air. The *Z/E* ratio of palladium(II) complex was determined by <sup>1</sup>H NMR analysis of the crude reaction mixture.

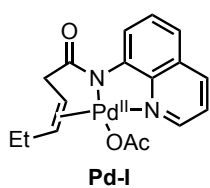

**Pd Complex I (Pd-I):** The title compound was isolated as a yellow solid (16 mg, 80% yield). <sup>1</sup>H NMR (500 MHz, CD<sub>3</sub>CN) δ 8.77 (dd, *J* = 5.7, 3.2 Hz, 1H), 8.56 (dd, *J* = 8.4, 1.5 Hz, 1H), 8.49 (dd, *J* = 5.0, 1.5 Hz, 1H), 7.65 (dd, *J* = 8.3, 5.1 Hz, 1H), 7.55–7.52 (m, 2H), 6.40–6.32 (m, 1H), 5.95 (q, *J* = 7.6 Hz, 1H), 3.47 (dd, *J* = 17.5, 7.6 Hz, 1H), 3.16 (ddd, *J* = 17.4, 5.2, 1.3 Hz, 1H), 2.47 (dtd, *J* = 14.9, 7.5, 0.9 Hz, 1H), 1.98 (s, 3H), 1.30 (t, *J* = 7.5 Hz, 3H); <sup>13</sup>C NMR (150 MHz, CD<sub>3</sub>CN) δ 181.3, 177.4, 147.6, 147.3, 141.6, 131.2, 130.3, 122.6, 122.3, 121.3, 120.1, 92.2, 37.4, 25.5, 23.6, 13.2; **HRMS** (ESI-TOF) Calcd for C<sub>15</sub>H<sub>15</sub>N<sub>2</sub>OPd [M–OAc] 343.0225, found 343.0225. **X-ray** (single-crystal) Yellow block crystals of X-ray diffraction quality were obtained by vapor diffusion of hexanes into a saturated solution of **Pd-I** in benzene (CCDC 1888954).<sup>24</sup>

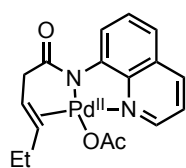

***E*-Alkene Pd Complex:** <sup>1</sup>H NMR (600 MHz, CD<sub>3</sub>OD) δ 8.66 (ddd, *J* = 8.1, 5.2, 1.4 Hz, 2H), 8.41 (dd, *J* = 5.1, 1.5 Hz, 1H), 7.74–7.66 (m, 1H), 7.64–7.57 (m, 2H), 6.58 (dt, *J* = 14.1, 6.8 Hz, 1H), 5.93 (ddd, *J* = 14.8, 6.7, 2.5 Hz, 1H), 3.66 (dd, *J* = 17.9, 6.7 Hz, 1H), 2.26–2.17 (m, 1H), 2.08 (s, 3H), 1.97–1.89 (m, 1H), 1.26 (t, *J* = 7.4 Hz, 3H). One of the aliphatic protons could not be confidently assigned due to overlap with methanol peaks.

## Representative $^1\text{H}$ NMR spectra for determination of *E/Z* ratios

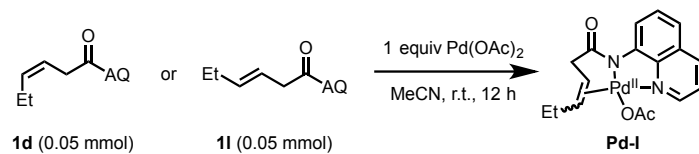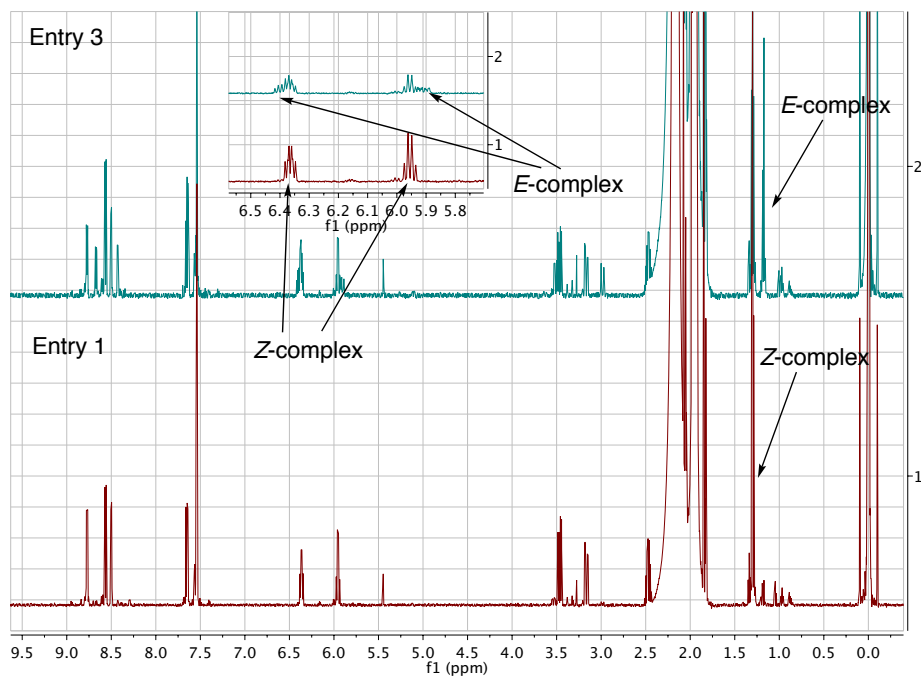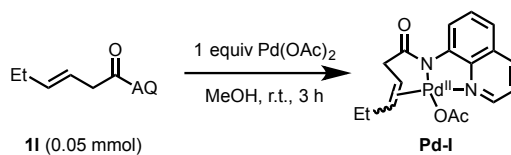

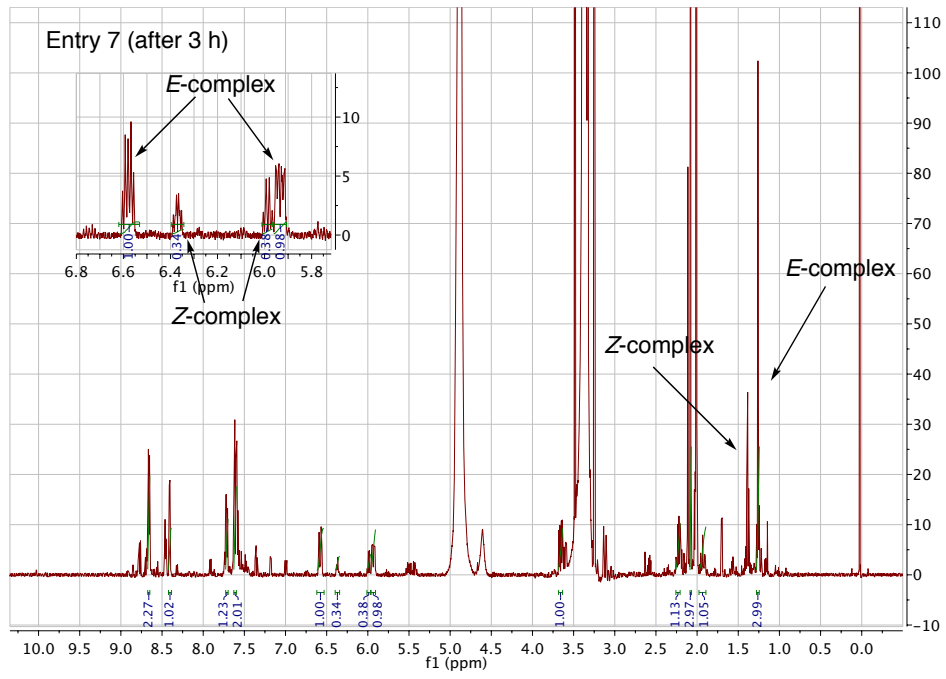

## X-RAY CRYSTALLOGRAPHY

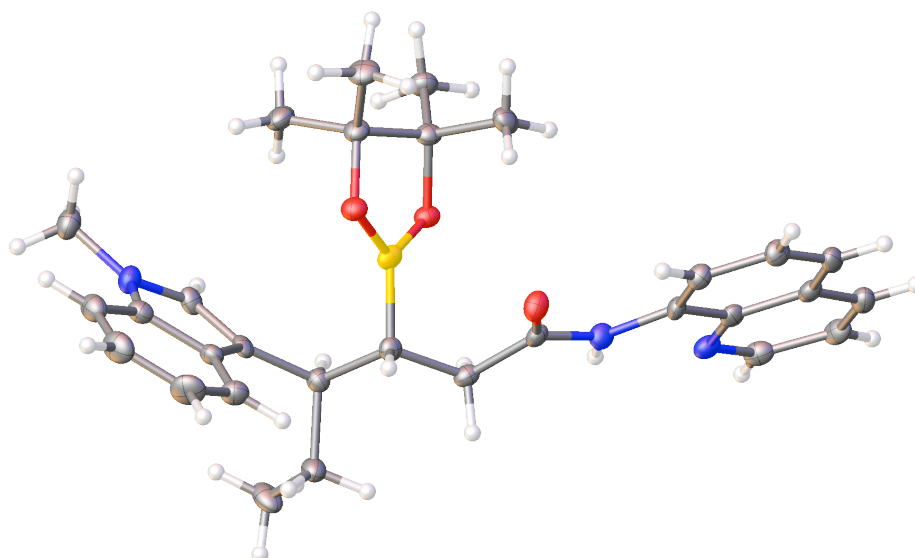

**Table S6.** Crystal data and structure refinement for **4f**.

|                                   |                                                                 |                  |
|-----------------------------------|-----------------------------------------------------------------|------------------|
| Identification code               | LZ-Et-S                                                         |                  |
| Empirical formula                 | C <sub>30</sub> H <sub>36</sub> B N <sub>3</sub> O <sub>3</sub> |                  |
| Formula weight                    | 497.43                                                          |                  |
| Temperature                       | 100.0 K                                                         |                  |
| Wavelength                        | 1.54178 Å                                                       |                  |
| Crystal system                    | Monoclinic                                                      |                  |
| Space group                       | P 21                                                            |                  |
| Unit cell dimensions              | a = 6.37430(10) Å                                               | α = 90°.         |
|                                   | b = 23.6017(6) Å                                                | β = 101.680(2)°. |
|                                   | c = 9.0486(2) Å                                                 | γ = 90°.         |
| Volume                            | 1333.12(5) Å <sup>3</sup>                                       |                  |
| Z                                 | 2                                                               |                  |
| Density (calculated)              | 1.239 Mg/m <sup>3</sup>                                         |                  |
| Absorption coefficient            | 0.629 mm <sup>-1</sup>                                          |                  |
| F(000)                            | 532                                                             |                  |
| Crystal size                      | 0.27 x 0.13 x 0.08 mm <sup>3</sup>                              |                  |
| Theta range for data collection   | 3.746 to 68.277°.                                               |                  |
| Index ranges                      | -7 ≤ h ≤ 7, -28 ≤ k ≤ 28, -10 ≤ l ≤ 10                          |                  |
| Reflections collected             | 18399                                                           |                  |
| Independent reflections           | 4851 [R(int) = 0.0255]                                          |                  |
| Completeness to theta = 67.679°   | 99.7 %                                                          |                  |
| Absorption correction             | Semi-empirical from equivalents                                 |                  |
| Max. and min. transmission        | 0.7531 and 0.6828                                               |                  |
| Refinement method                 | Full-matrix least-squares on F <sup>2</sup>                     |                  |
| Data / restraints / parameters    | 4851 / 1 / 340                                                  |                  |
| Goodness-of-fit on F <sup>2</sup> | 1.035                                                           |                  |
| Final R indices [I > 2σ(I)]       | R1 = 0.0248, wR2 = 0.0607                                       |                  |
| R indices (all data)              | R1 = 0.0255, wR2 = 0.0611                                       |                  |
| Absolute structure parameter      | 0.01(5) [stereochem. confirmed]                                 |                  |
| Extinction coefficient            | n/a                                                             |                  |
| Largest diff. peak and hole       | 0.163 and -0.154 e.Å <sup>-3</sup>                              |                  |

**Table S7.** Atomic coordinates ( $\times 10^4$ ) and equivalent isotropic displacement parameters ( $\text{\AA}^2 \times 10^3$ ) for **4f**.  $U(\text{eq})$  is defined as one third of the trace of the orthogonalized  $U^{\text{ij}}$  tensor.

|       | x        | y       | z        | U(eq) |
|-------|----------|---------|----------|-------|
| O(2)  | 3837(2)  | 4534(1) | 5889(1)  | 16(1) |
| O(1)  | 4310(2)  | 5266(1) | 4336(1)  | 18(1) |
| O(3)  | 8649(2)  | 4865(1) | 7238(1)  | 21(1) |
| N(3)  | 8293(2)  | 3384(1) | 10978(2) | 20(1) |
| N(2)  | 8134(2)  | 4259(1) | 9092(2)  | 18(1) |
| N(1)  | -868(2)  | 6354(1) | 4161(2)  | 20(1) |
| C(22) | 826(3)   | 6716(1) | 4199(2)  | 19(1) |
| C(5)  | 13068(3) | 3051(1) | 9363(2)  | 22(1) |
| C(8)  | 9791(3)  | 3868(1) | 9103(2)  | 17(1) |
| C(9)  | 9849(3)  | 3406(1) | 10144(2) | 17(1) |
| C(21) | 1050(3)  | 7171(1) | 3256(2)  | 25(1) |
| C(7)  | 11324(3) | 3905(1) | 8239(2)  | 19(1) |
| C(2)  | 9937(3)  | 2531(1) | 12134(2) | 24(1) |
| C(1)  | 8354(3)  | 2957(1) | 11929(2) | 22(1) |
| C(4)  | 11507(3) | 2997(1) | 10261(2) | 19(1) |
| C(17) | 2461(3)  | 6562(1) | 5447(2)  | 18(1) |
| C(16) | 1668(3)  | 6087(1) | 6167(2)  | 17(1) |
| C(30) | -338(3)  | 5979(1) | 5346(2)  | 18(1) |
| C(6)  | 12965(3) | 3495(1) | 8382(2)  | 21(1) |
| C(10) | 7679(3)  | 4733(1) | 8218(2)  | 16(1) |
| C(25) | 3819(3)  | 4281(1) | 4411(2)  | 18(1) |
| C(14) | 3142(3)  | 6138(1) | 8958(2)  | 24(1) |
| C(11) | 5884(3)  | 5093(1) | 8579(2)  | 18(1) |
| C(12) | 4877(3)  | 5476(1) | 7249(2)  | 16(1) |
| C(18) | 4364(3)  | 6876(1) | 5708(2)  | 24(1) |
| C(28) | 3332(3)  | 4803(1) | 3356(2)  | 19(1) |
| C(13) | 2793(3)  | 5761(1) | 7534(2)  | 17(1) |
| C(29) | 946(3)   | 4935(1) | 2908(2)  | 26(1) |
| C(20) | 2939(4)  | 7474(1) | 3568(2)  | 30(1) |
| C(24) | 6046(3)  | 4036(1) | 4463(2)  | 24(1) |
| C(26) | 2148(3)  | 3816(1) | 4130(2)  | 24(1) |
| C(15) | 1096(4)  | 6189(1) | 9584(2)  | 32(1) |
| C(23) | -2763(3) | 6322(1) | 2962(2)  | 27(1) |
| C(3)  | 11487(3) | 2552(1) | 11303(2) | 23(1) |
| B(1)  | 4348(3)  | 5095(1) | 5785(2)  | 15(1) |
| C(27) | 4327(3)  | 4787(1) | 1972(2)  | 27(1) |
| C(19) | 4580(4)  | 7328(1) | 4778(2)  | 31(1) |

**Table S8.** Bond lengths [ $\text{\AA}$ ] and angles [ $^\circ$ ] for **4f**.

|            |          |
|------------|----------|
| O(2)-C(25) | 1.462(2) |
| O(2)-B(1)  | 1.373(2) |
| O(1)-C(28) | 1.464(2) |
| O(1)-B(1)  | 1.367(2) |
| O(3)-C(10) | 1.219(2) |
| N(3)-C(9)  | 1.363(2) |
| N(3)-C(1)  | 1.321(2) |
| N(2)-H(2)  | 0.8800   |
| N(2)-C(8)  | 1.401(2) |
| N(2)-C(10) | 1.366(2) |
| N(1)-C(22) | 1.371(2) |
| N(1)-C(30) | 1.379(2) |
| N(1)-C(23) | 1.453(2) |

|              |          |
|--------------|----------|
| C(22)-C(21)  | 1.397(3) |
| C(22)-C(17)  | 1.420(3) |
| C(5)-H(5)    | 0.9500   |
| C(5)-C(4)    | 1.412(3) |
| C(5)-C(6)    | 1.366(3) |
| C(8)-C(9)    | 1.436(2) |
| C(8)-C(7)    | 1.373(3) |
| C(9)-C(4)    | 1.418(3) |
| C(21)-H(21)  | 0.9500   |
| C(21)-C(20)  | 1.381(3) |
| C(7)-H(7)    | 0.9500   |
| C(7)-C(6)    | 1.411(3) |
| C(2)-H(2A)   | 0.9500   |
| C(2)-C(1)    | 1.410(3) |
| C(2)-C(3)    | 1.359(3) |
| C(1)-H(1)    | 0.9500   |
| C(4)-C(3)    | 1.413(3) |
| C(17)-C(16)  | 1.440(3) |
| C(17)-C(18)  | 1.399(3) |
| C(16)-C(30)  | 1.366(3) |
| C(16)-C(13)  | 1.508(2) |
| C(30)-H(30)  | 0.9500   |
| C(6)-H(6)    | 0.9500   |
| C(10)-C(11)  | 1.513(2) |
| C(25)-C(28)  | 1.552(2) |
| C(25)-C(24)  | 1.525(2) |
| C(25)-C(26)  | 1.514(2) |
| C(14)-H(14A) | 0.9900   |
| C(14)-H(14B) | 0.9900   |
| C(14)-C(13)  | 1.544(2) |
| C(14)-C(15)  | 1.528(3) |
| C(11)-H(11A) | 0.9900   |
| C(11)-H(11B) | 0.9900   |
| C(11)-C(12)  | 1.538(2) |
| C(12)-H(12)  | 1.0000   |
| C(12)-C(13)  | 1.557(2) |
| C(12)-B(1)   | 1.579(3) |
| C(18)-H(18)  | 0.9500   |
| C(18)-C(19)  | 1.383(3) |
| C(28)-C(29)  | 1.524(3) |
| C(28)-C(27)  | 1.514(3) |
| C(13)-H(13)  | 1.0000   |
| C(29)-H(29A) | 0.9800   |
| C(29)-H(29B) | 0.9800   |
| C(29)-H(29C) | 0.9800   |
| C(20)-H(20)  | 0.9500   |
| C(20)-C(19)  | 1.396(3) |
| C(24)-H(24A) | 0.9800   |
| C(24)-H(24B) | 0.9800   |
| C(24)-H(24C) | 0.9800   |
| C(26)-H(26A) | 0.9800   |
| C(26)-H(26B) | 0.9800   |
| C(26)-H(26C) | 0.9800   |
| C(15)-H(15A) | 0.9800   |
| C(15)-H(15B) | 0.9800   |
| C(15)-H(15C) | 0.9800   |
| C(23)-H(23A) | 0.9800   |
| C(23)-H(23B) | 0.9800   |
| C(23)-H(23C) | 0.9800   |
| C(3)-H(3)    | 0.9500   |

|                   |            |
|-------------------|------------|
| C(27)-H(27A)      | 0.9800     |
| C(27)-H(27B)      | 0.9800     |
| C(27)-H(27C)      | 0.9800     |
| C(19)-H(19)       | 0.9500     |
|                   |            |
| B(1)-O(2)-C(25)   | 106.84(13) |
| B(1)-O(1)-C(28)   | 106.54(13) |
| C(1)-N(3)-C(9)    | 117.44(16) |
| C(8)-N(2)-H(2)    | 116.0      |
| C(10)-N(2)-H(2)   | 116.0      |
| C(10)-N(2)-C(8)   | 127.92(15) |
| C(22)-N(1)-C(30)  | 108.17(14) |
| C(22)-N(1)-C(23)  | 125.62(15) |
| C(30)-N(1)-C(23)  | 125.70(16) |
| N(1)-C(22)-C(21)  | 129.79(17) |
| N(1)-C(22)-C(17)  | 108.03(15) |
| C(21)-C(22)-C(17) | 122.17(17) |
| C(4)-C(5)-H(5)    | 120.1      |
| C(6)-C(5)-H(5)    | 120.1      |
| C(6)-C(5)-C(4)    | 119.71(17) |
| N(2)-C(8)-C(9)    | 115.11(15) |
| C(7)-C(8)-N(2)    | 125.21(16) |
| C(7)-C(8)-C(9)    | 119.66(16) |
| N(3)-C(9)-C(8)    | 117.78(15) |
| N(3)-C(9)-C(4)    | 123.17(16) |
| C(4)-C(9)-C(8)    | 119.04(15) |
| C(22)-C(21)-H(21) | 121.1      |
| C(20)-C(21)-C(22) | 117.83(18) |
| C(20)-C(21)-H(21) | 121.1      |
| C(8)-C(7)-H(7)    | 119.9      |
| C(8)-C(7)-C(6)    | 120.23(16) |
| C(6)-C(7)-H(7)    | 119.9      |
| C(1)-C(2)-H(2A)   | 120.6      |
| C(3)-C(2)-H(2A)   | 120.6      |
| C(3)-C(2)-C(1)    | 118.81(17) |
| N(3)-C(1)-C(2)    | 123.78(18) |
| N(3)-C(1)-H(1)    | 118.1      |
| C(2)-C(1)-H(1)    | 118.1      |
| C(5)-C(4)-C(9)    | 119.79(16) |
| C(5)-C(4)-C(3)    | 123.57(17) |
| C(3)-C(4)-C(9)    | 116.64(17) |
| C(22)-C(17)-C(16) | 106.84(16) |
| C(18)-C(17)-C(22) | 118.13(17) |
| C(18)-C(17)-C(16) | 135.02(18) |
| C(17)-C(16)-C(13) | 127.98(16) |
| C(30)-C(16)-C(17) | 105.96(16) |
| C(30)-C(16)-C(13) | 126.05(16) |
| N(1)-C(30)-H(30)  | 124.5      |
| C(16)-C(30)-N(1)  | 110.99(15) |
| C(16)-C(30)-H(30) | 124.5      |
| C(5)-C(6)-C(7)    | 121.56(17) |
| C(5)-C(6)-H(6)    | 119.2      |
| C(7)-C(6)-H(6)    | 119.2      |
| O(3)-C(10)-N(2)   | 123.36(16) |
| O(3)-C(10)-C(11)  | 122.06(15) |
| N(2)-C(10)-C(11)  | 114.57(15) |
| O(2)-C(25)-C(28)  | 101.65(13) |
| O(2)-C(25)-C(24)  | 106.93(14) |
| O(2)-C(25)-C(26)  | 108.93(14) |
| C(24)-C(25)-C(28) | 112.88(15) |



|                     |            |
|---------------------|------------|
| C(26)-C(25)-C(28)   | 115.20(15) |
| C(26)-C(25)-C(24)   | 110.50(15) |
| H(14A)-C(14)-H(14B) | 108.0      |
| C(13)-C(14)-H(14A)  | 109.3      |
| C(13)-C(14)-H(14B)  | 109.3      |
| C(15)-C(14)-H(14A)  | 109.3      |
| C(15)-C(14)-H(14B)  | 109.3      |
| C(15)-C(14)-C(13)   | 111.45(17) |
| C(10)-C(11)-H(11A)  | 109.2      |
| C(10)-C(11)-H(11B)  | 109.2      |
| C(10)-C(11)-C(12)   | 112.05(14) |
| H(11A)-C(11)-H(11B) | 107.9      |
| C(12)-C(11)-H(11A)  | 109.2      |
| C(12)-C(11)-H(11B)  | 109.2      |
| C(11)-C(12)-H(12)   | 109.3      |
| C(11)-C(12)-C(13)   | 111.11(14) |
| C(11)-C(12)-B(1)    | 107.86(14) |
| C(13)-C(12)-H(12)   | 109.3      |
| C(13)-C(12)-B(1)    | 109.91(14) |
| B(1)-C(12)-H(12)    | 109.3      |
| C(17)-C(18)-H(18)   | 120.2      |
| C(19)-C(18)-C(17)   | 119.65(18) |
| C(19)-C(18)-H(18)   | 120.2      |
| O(1)-C(28)-C(25)    | 102.23(13) |
| O(1)-C(28)-C(29)    | 106.83(14) |
| O(1)-C(28)-C(27)    | 108.78(15) |
| C(29)-C(28)-C(25)   | 112.93(15) |
| C(27)-C(28)-C(25)   | 115.02(15) |
| C(27)-C(28)-C(29)   | 110.36(15) |
| C(16)-C(13)-C(14)   | 110.85(14) |
| C(16)-C(13)-C(12)   | 111.41(14) |
| C(16)-C(13)-H(13)   | 106.8      |
| C(14)-C(13)-C(12)   | 113.80(14) |
| C(14)-C(13)-H(13)   | 106.8      |
| C(12)-C(13)-H(13)   | 106.8      |
| C(28)-C(29)-H(29A)  | 109.5      |
| C(28)-C(29)-H(29B)  | 109.5      |
| C(28)-C(29)-H(29C)  | 109.5      |
| H(29A)-C(29)-H(29B) | 109.5      |
| H(29A)-C(29)-H(29C) | 109.5      |
| H(29B)-C(29)-H(29C) | 109.5      |
| C(21)-C(20)-H(20)   | 119.5      |
| C(21)-C(20)-C(19)   | 121.05(18) |
| C(19)-C(20)-H(20)   | 119.5      |
| C(25)-C(24)-H(24A)  | 109.5      |
| C(25)-C(24)-H(24B)  | 109.5      |
| C(25)-C(24)-H(24C)  | 109.5      |
| H(24A)-C(24)-H(24B) | 109.5      |
| H(24A)-C(24)-H(24C) | 109.5      |
| H(24B)-C(24)-H(24C) | 109.5      |
| C(25)-C(26)-H(26A)  | 109.5      |
| C(25)-C(26)-H(26B)  | 109.5      |
| C(25)-C(26)-H(26C)  | 109.5      |
| H(26A)-C(26)-H(26B) | 109.5      |
| H(26A)-C(26)-H(26C) | 109.5      |
| H(26B)-C(26)-H(26C) | 109.5      |
| C(14)-C(15)-H(15A)  | 109.5      |
| C(14)-C(15)-H(15B)  | 109.5      |
| C(14)-C(15)-H(15C)  | 109.5      |
| H(15A)-C(15)-H(15B) | 109.5      |

|                     |            |
|---------------------|------------|
| H(15A)-C(15)-H(15C) | 109.5      |
| H(15B)-C(15)-H(15C) | 109.5      |
| N(1)-C(23)-H(23A)   | 109.5      |
| N(1)-C(23)-H(23B)   | 109.5      |
| N(1)-C(23)-H(23C)   | 109.5      |
| H(23A)-C(23)-H(23B) | 109.5      |
| H(23A)-C(23)-H(23C) | 109.5      |
| H(23B)-C(23)-H(23C) | 109.5      |
| C(2)-C(3)-C(4)      | 120.15(18) |
| C(2)-C(3)-H(3)      | 119.9      |
| C(4)-C(3)-H(3)      | 119.9      |
| O(2)-B(1)-C(12)     | 120.33(16) |
| O(1)-B(1)-O(2)      | 113.03(16) |
| O(1)-B(1)-C(12)     | 126.64(16) |
| C(28)-C(27)-H(27A)  | 109.5      |
| C(28)-C(27)-H(27B)  | 109.5      |
| C(28)-C(27)-H(27C)  | 109.5      |
| H(27A)-C(27)-H(27B) | 109.5      |
| H(27A)-C(27)-H(27C) | 109.5      |
| H(27B)-C(27)-H(27C) | 109.5      |
| C(18)-C(19)-C(20)   | 121.15(19) |
| C(18)-C(19)-H(19)   | 119.4      |
| C(20)-C(19)-H(19)   | 119.4      |

Symmetry transformations used to generate equivalent atoms:

**Table S9.** Anisotropic displacement parameters ( $\text{\AA}^2 \times 10^3$ ) for **4f**. The anisotropic displacement factor exponent takes the form:  $-2^2 [h^2 a^* U^{11} + \dots + 2 h k a^* b^* U^{12}]$ .

|       | $U^{11}$ | $U^{22}$ | $U^{33}$ | $U^{23}$ | $U^{13}$ | $U^{12}$ |
|-------|----------|----------|----------|----------|----------|----------|
| O(2)  | 20(1)    | 15(1)    | 14(1)    | -1(1)    | 5(1)     | -2(1)    |
| O(1)  | 24(1)    | 16(1)    | 15(1)    | 0(1)     | 5(1)     | -1(1)    |
| O(3)  | 19(1)    | 22(1)    | 22(1)    | 7(1)     | 6(1)     | 1(1)     |
| N(3)  | 21(1)    | 20(1)    | 18(1)    | 1(1)     | 3(1)     | -3(1)    |
| N(2)  | 19(1)    | 21(1)    | 17(1)    | 3(1)     | 6(1)     | 1(1)     |
| N(1)  | 20(1)    | 21(1)    | 20(1)    | 4(1)     | 2(1)     | 2(1)     |
| C(22) | 23(1)    | 16(1)    | 18(1)    | -1(1)    | 6(1)     | 4(1)     |
| C(5)  | 18(1)    | 21(1)    | 24(1)    | -1(1)    | -1(1)    | 2(1)     |
| C(8)  | 18(1)    | 16(1)    | 15(1)    | 1(1)     | -1(1)    | -1(1)    |
| C(9)  | 17(1)    | 17(1)    | 16(1)    | -1(1)    | 0(1)     | -5(1)    |
| C(21) | 35(1)    | 19(1)    | 21(1)    | 4(1)     | 5(1)     | 5(1)     |
| C(7)  | 21(1)    | 20(1)    | 17(1)    | 3(1)     | 3(1)     | -1(1)    |
| C(2)  | 34(1)    | 17(1)    | 21(1)    | 4(1)     | 1(1)     | -5(1)    |
| C(1)  | 26(1)    | 21(1)    | 19(1)    | 1(1)     | 5(1)     | -7(1)    |
| C(4)  | 20(1)    | 16(1)    | 18(1)    | -1(1)    | -2(1)    | -3(1)    |
| C(17) | 25(1)    | 13(1)    | 17(1)    | -3(1)    | 6(1)     | 2(1)     |
| C(16) | 22(1)    | 14(1)    | 16(1)    | -1(1)    | 7(1)     | 3(1)     |
| C(30) | 19(1)    | 15(1)    | 21(1)    | 2(1)     | 7(1)     | 2(1)     |
| C(6)  | 17(1)    | 25(1)    | 22(1)    | 0(1)     | 4(1)     | -1(1)    |
| C(10) | 16(1)    | 17(1)    | 14(1)    | 1(1)     | -1(1)    | -3(1)    |
| C(25) | 22(1)    | 18(1)    | 14(1)    | -4(1)    | 4(1)     | -1(1)    |
| C(14) | 33(1)    | 21(1)    | 19(1)    | -2(1)    | 5(1)     | 6(1)     |
| C(11) | 21(1)    | 19(1)    | 14(1)    | 0(1)     | 2(1)     | -2(1)    |
| C(12) | 17(1)    | 15(1)    | 16(1)    | 1(1)     | 3(1)     | 0(1)     |
| C(18) | 29(1)    | 18(1)    | 22(1)    | -2(1)    | 2(1)     | -2(1)    |
| C(28) | 24(1)    | 19(1)    | 14(1)    | -2(1)    | 4(1)     | 0(1)     |
| C(13) | 21(1)    | 15(1)    | 16(1)    | 0(1)     | 4(1)     | 1(1)     |
| C(29) | 28(1)    | 28(1)    | 19(1)    | -2(1)    | -1(1)    | 4(1)     |

|       |       |       |       |       |       |        |
|-------|-------|-------|-------|-------|-------|--------|
| C(20) | 46(1) | 17(1) | 29(1) | 6(1)  | 12(1) | -2(1)  |
| C(24) | 24(1) | 23(1) | 26(1) | -3(1) | 5(1)  | 6(1)   |
| C(26) | 27(1) | 21(1) | 24(1) | -5(1) | 4(1)  | -6(1)  |
| C(15) | 50(1) | 26(1) | 24(1) | 2(1)  | 18(1) | 12(1)  |
| C(23) | 24(1) | 30(1) | 25(1) | 5(1)  | 0(1)  | 3(1)   |
| C(3)  | 27(1) | 16(1) | 23(1) | 2(1)  | -1(1) | 1(1)   |
| B(1)  | 13(1) | 16(1) | 17(1) | 1(1)  | 4(1)  | 1(1)   |
| C(27) | 36(1) | 30(1) | 18(1) | -1(1) | 10(1) | 0(1)   |
| C(19) | 36(1) | 19(1) | 36(1) | -1(1) | 7(1)  | -10(1) |

**Table S10.** Hydrogen coordinates ( $\times 10^4$ ) and isotropic displacement parameters ( $\text{\AA}^2 \times 10^3$ ) for **4f**.

|        | x     | y    | z     | U(eq) |
|--------|-------|------|-------|-------|
| H(2)   | 7281  | 4191 | 9724  | 22    |
| H(5)   | 14185 | 2779 | 9440  | 26    |
| H(21)  | -62   | 7268 | 2427  | 30    |
| H(7)   | 11281 | 4208 | 7541  | 23    |
| H(2A)  | 9920  | 2234 | 12841 | 29    |
| H(1)   | 7269  | 2936 | 12508 | 26    |
| H(30)  | -1246 | 5684 | 5563  | 22    |
| H(6)   | 14022 | 3529 | 7783  | 25    |
| H(14A) | 4293  | 5973 | 9740  | 29    |
| H(14B) | 3609  | 6520 | 8707  | 29    |
| H(11A) | 6449  | 5331 | 9471  | 22    |
| H(11B) | 4765  | 4842 | 8837  | 22    |
| H(12)  | 5929  | 5775 | 7109  | 19    |
| H(18)  | 5502  | 6778 | 6520  | 28    |
| H(13)  | 1806  | 5449 | 7698  | 21    |
| H(29A) | 312   | 4929 | 3808  | 39    |
| H(29B) | 244   | 4649 | 2188  | 39    |
| H(29C) | 747   | 5310 | 2439  | 39    |
| H(20)  | 3125  | 7788 | 2950  | 36    |
| H(24A) | 7114  | 4339 | 4690  | 37    |
| H(24B) | 6107  | 3867 | 3484  | 37    |
| H(24C) | 6349  | 3745 | 5250  | 37    |
| H(26A) | 2539  | 3517 | 4888  | 36    |
| H(26B) | 2074  | 3657 | 3121  | 36    |
| H(26C) | 749   | 3974 | 4201  | 36    |
| H(15A) | -75   | 6324 | 8787  | 48    |
| H(15B) | 1329  | 6459 | 10425 | 48    |
| H(15C) | 723   | 5818 | 9941  | 48    |
| H(23A) | -3400 | 6700 | 2777  | 40    |
| H(23B) | -3805 | 6064 | 3261  | 40    |
| H(23C) | -2362 | 6182 | 2038  | 40    |
| H(3)   | 12561 | 2267 | 11423 | 28    |
| H(27A) | 3906  | 5126 | 1360  | 41    |
| H(27B) | 3828  | 4448 | 1375  | 41    |
| H(27C) | 5891  | 4774 | 2286  | 41    |
| H(19)  | 5868  | 7542 | 4966  | 37    |

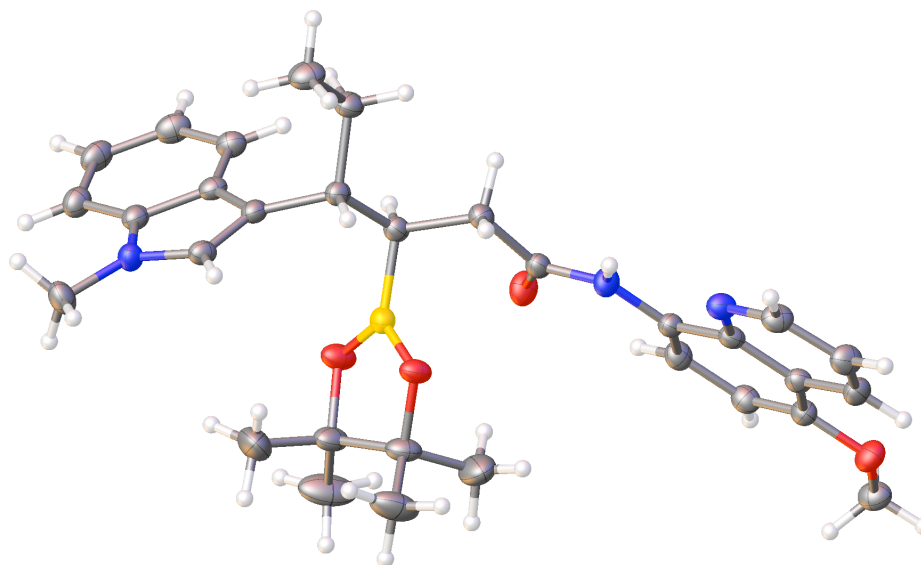

**Table S11.** Crystal data and structure refinement for **4g**.

|                                   |                                                                 |                    |
|-----------------------------------|-----------------------------------------------------------------|--------------------|
| Report date                       | 2018-09-19                                                      |                    |
| Identification code               | engle140                                                        |                    |
| Empirical formula                 | C <sub>31</sub> H <sub>38</sub> B N <sub>3</sub> O <sub>4</sub> |                    |
| Molecular formula                 | C <sub>31</sub> H <sub>38</sub> B N <sub>3</sub> O <sub>4</sub> |                    |
| Formula weight                    | 527.45                                                          |                    |
| Temperature                       | 100.0 K                                                         |                    |
| Wavelength                        | 1.54178 Å                                                       |                    |
| Crystal system                    | Monoclinic                                                      |                    |
| Space group                       | P 1 21 1                                                        |                    |
| Unit cell dimensions              | a = 6.5323(2) Å                                                 | α = 90°.           |
|                                   | b = 24.4180(6) Å                                                | β = 104.3870(10)°. |
|                                   | c = 9.1910(2) Å                                                 | γ = 90°.           |
| Volume                            | 1420.04(6) Å <sup>3</sup>                                       |                    |
| Z                                 | 2                                                               |                    |
| Density (calculated)              | 1.234 Mg/m <sup>3</sup>                                         |                    |
| Absorption coefficient            | 0.646 mm <sup>-1</sup>                                          |                    |
| F(000)                            | 564                                                             |                    |
| Crystal size                      | 0.125 x 0.08 x 0.04 mm <sup>3</sup>                             |                    |
| Crystal color, habit              | colorless plank                                                 |                    |
| Theta range for data collection   | 3.620 to 70.172°.                                               |                    |
| Index ranges                      | -7 ≤ h ≤ 7, -25 ≤ k ≤ 28, -11 ≤ l ≤ 11                          |                    |
| Reflections collected             | 22034                                                           |                    |
| Independent reflections           | 5204 [R(int) = 0.0494]                                          |                    |
| Completeness to theta = 67.500°   | 99.5 %                                                          |                    |
| Absorption correction             | Semi-empirical from equivalents                                 |                    |
| Max. and min. transmission        | 0.5856 and 0.5041                                               |                    |
| Refinement method                 | Full-matrix least-squares on F <sup>2</sup>                     |                    |
| Data / restraints / parameters    | 5204 / 2 / 363                                                  |                    |
| Goodness-of-fit on F <sup>2</sup> | 1.045                                                           |                    |
| Final R indices [I > 2σ(I)]       | R1 = 0.0398, wR2 = 0.0878                                       |                    |
| R indices (all data)              | R1 = 0.0483, wR2 = 0.0923                                       |                    |
| Absolute structure parameter      | 0.02(13)                                                        |                    |
| Largest diff. peak and hole       | 0.270 and -0.188 e.Å <sup>-3</sup>                              |                    |

**Table S12.** Atomic coordinates ( $\times 10^4$ ) and equivalent isotropic displacement parameters ( $\text{\AA}^2 \times 10^3$ ) for **4g**. U(eq) is defined as one third of the trace of the orthogonalized Uij tensor.

|       | x        | y       | z        | U(eq) |
|-------|----------|---------|----------|-------|
| O(1)  | 1506(4)  | 4894(1) | 2317(2)  | 30(1) |
| O(2)  | -3862(3) | 2622(1) | 222(2)   | 30(1) |
| O(3)  | 6345(3)  | 4538(1) | 3714(2)  | 26(1) |
| O(4)  | 5641(4)  | 5207(1) | 5252(2)  | 31(1) |
| N(1)  | 1840(4)  | 3472(1) | -1340(3) | 25(1) |
| N(2)  | 1934(4)  | 4321(1) | 469(3)   | 24(1) |
| N(3)  | 11175(4) | 6241(1) | 5625(3)  | 25(1) |
| C(1)  | 1851(5)  | 3050(1) | -2243(3) | 28(1) |
| C(2)  | 435(5)   | 2612(1) | -2402(3) | 31(1) |
| C(3)  | -1041(5) | 2605(1) | -1576(3) | 28(1) |
| C(4)  | -1100(5) | 3044(1) | -584(3)  | 23(1) |
| C(5)  | -2554(5) | 3067(1) | 341(3)   | 24(1) |
| C(6)  | -2540(5) | 3508(1) | 1259(3)  | 26(1) |
| C(7)  | -1062(5) | 3937(1) | 1331(3)  | 26(1) |
| C(8)  | 377(5)   | 3924(1) | 478(3)   | 22(1) |
| C(9)  | 367(5)   | 3472(1) | -515(3)  | 22(1) |
| C(10) | 2424(5)  | 4773(1) | 1348(3)  | 23(1) |
| C(11) | 4169(5)  | 5122(1) | 1038(3)  | 24(1) |
| C(12) | 5277(5)  | 5463(1) | 2419(3)  | 22(1) |
| C(13) | 7348(5)  | 5717(1) | 2212(3)  | 22(1) |
| C(14) | 8549(5)  | 6012(1) | 3608(3)  | 22(1) |
| C(15) | 7889(5)  | 6481(1) | 4324(3)  | 23(1) |
| C(16) | 6093(5)  | 6816(1) | 4030(4)  | 27(1) |
| C(17) | 6061(6)  | 7273(1) | 4924(4)  | 32(1) |
| C(18) | 7778(6)  | 7400(1) | 6118(4)  | 32(1) |
| C(19) | 9550(5)  | 7070(1) | 6478(4)  | 29(1) |
| C(20) | 9585(5)  | 6614(1) | 5568(3)  | 24(1) |
| C(21) | 10523(5) | 5882(1) | 4435(3)  | 24(1) |
| C(22) | 13172(5) | 6219(2) | 6748(3)  | 33(1) |
| C(23) | -5194(5) | 2596(1) | 1233(4)  | 32(1) |
| C(24) | 7041(5)  | 6094(1) | 821(3)   | 29(1) |
| C(25) | 9100(6)  | 6212(2) | 400(4)   | 36(1) |
| C(26) | 6574(6)  | 4749(1) | 6235(3)  | 34(1) |
| C(27) | 6290(6)  | 4266(1) | 5110(3)  | 32(1) |
| C(28) | 5472(9)  | 4694(2) | 7472(4)  | 64(1) |
| C(29) | 8897(7)  | 4897(2) | 6861(5)  | 59(1) |
| C(30) | 4109(7)  | 4000(2) | 4845(5)  | 58(1) |
| C(31) | 7961(8)  | 3833(2) | 5461(4)  | 53(1) |
| B(1)  | 5738(6)  | 5072(1) | 3835(4)  | 24(1) |

**Table S13.** Bond lengths [ $\text{\AA}$ ] and angles [ $^\circ$ ] for **4g**.

|            |          |
|------------|----------|
| O(1)-C(10) | 1.226(4) |
| O(2)-C(5)  | 1.370(4) |
| O(2)-C(23) | 1.423(4) |
| O(3)-C(27) | 1.453(3) |
| O(3)-B(1)  | 1.376(4) |
| O(4)-C(26) | 1.470(4) |
| O(4)-B(1)  | 1.360(4) |
| N(1)-C(1)  | 1.324(4) |
| N(1)-C(9)  | 1.365(4) |
| N(2)-H(2)  | 0.87(2)  |
| N(2)-C(8)  | 1.406(4) |

|              |          |
|--------------|----------|
| N(2)-C(10)   | 1.359(4) |
| N(3)-C(20)   | 1.373(4) |
| N(3)-C(21)   | 1.383(4) |
| N(3)-C(22)   | 1.449(4) |
| C(1)-H(1)    | 0.9500   |
| C(1)-C(2)    | 1.399(5) |
| C(2)-H(2A)   | 0.9500   |
| C(2)-C(3)    | 1.367(4) |
| C(3)-H(3)    | 0.9500   |
| C(3)-C(4)    | 1.415(4) |
| C(4)-C(5)    | 1.425(4) |
| C(4)-C(9)    | 1.407(4) |
| C(5)-C(6)    | 1.366(4) |
| C(6)-H(6)    | 0.9500   |
| C(6)-C(7)    | 1.417(4) |
| C(7)-H(7)    | 0.9500   |
| C(7)-C(8)    | 1.366(4) |
| C(8)-C(9)    | 1.433(4) |
| C(10)-C(11)  | 1.506(4) |
| C(11)-H(11A) | 0.9900   |
| C(11)-H(11B) | 0.9900   |
| C(11)-C(12)  | 1.540(4) |
| C(12)-H(12)  | 1.0000   |
| C(12)-C(13)  | 1.543(4) |
| C(12)-B(1)   | 1.581(4) |
| C(13)-H(13)  | 1.0000   |
| C(13)-C(14)  | 1.510(4) |
| C(13)-C(24)  | 1.548(4) |
| C(14)-C(15)  | 1.440(4) |
| C(14)-C(21)  | 1.361(4) |
| C(15)-C(16)  | 1.400(4) |
| C(15)-C(20)  | 1.418(4) |
| C(16)-H(16)  | 0.9500   |
| C(16)-C(17)  | 1.389(4) |
| C(17)-H(17)  | 0.9500   |
| C(17)-C(18)  | 1.395(5) |
| C(18)-H(18)  | 0.9500   |
| C(18)-C(19)  | 1.381(5) |
| C(19)-H(19)  | 0.9500   |
| C(19)-C(20)  | 1.397(4) |
| C(21)-H(21)  | 0.9500   |
| C(22)-H(22A) | 0.9800   |
| C(22)-H(22B) | 0.9800   |
| C(22)-H(22C) | 0.9800   |
| C(23)-H(23A) | 0.9800   |
| C(23)-H(23B) | 0.9800   |
| C(23)-H(23C) | 0.9800   |
| C(24)-H(24A) | 0.9900   |
| C(24)-H(24B) | 0.9900   |
| C(24)-C(25)  | 1.516(5) |
| C(25)-H(25A) | 0.9800   |
| C(25)-H(25B) | 0.9800   |
| C(25)-H(25C) | 0.9800   |
| C(26)-C(27)  | 1.550(5) |
| C(26)-C(28)  | 1.495(5) |
| C(26)-C(29)  | 1.526(6) |
| C(27)-C(30)  | 1.529(5) |
| C(27)-C(31)  | 1.496(5) |
| C(28)-H(28A) | 0.9800   |
| C(28)-H(28B) | 0.9800   |

|              |        |
|--------------|--------|
| C(28)-H(28C) | 0.9800 |
| C(29)-H(29A) | 0.9800 |
| C(29)-H(29B) | 0.9800 |
| C(29)-H(29C) | 0.9800 |
| C(30)-H(30A) | 0.9800 |
| C(30)-H(30B) | 0.9800 |
| C(30)-H(30C) | 0.9800 |
| C(31)-H(31A) | 0.9800 |
| C(31)-H(31B) | 0.9800 |
| C(31)-H(31C) | 0.9800 |

|                     |          |
|---------------------|----------|
| C(5)-O(2)-C(23)     | 116.9(2) |
| B(1)-O(3)-C(27)     | 106.9(2) |
| B(1)-O(4)-C(26)     | 107.1(2) |
| C(1)-N(1)-C(9)      | 117.6(3) |
| C(8)-N(2)-H(2)      | 116(2)   |
| C(10)-N(2)-H(2)     | 115(2)   |
| C(10)-N(2)-C(8)     | 128.3(3) |
| C(20)-N(3)-C(21)    | 108.0(2) |
| C(20)-N(3)-C(22)    | 126.1(3) |
| C(21)-N(3)-C(22)    | 125.9(3) |
| N(1)-C(1)-H(1)      | 118.2    |
| N(1)-C(1)-C(2)      | 123.6(3) |
| C(2)-C(1)-H(1)      | 118.2    |
| C(1)-C(2)-H(2A)     | 120.3    |
| C(3)-C(2)-C(1)      | 119.4(3) |
| C(3)-C(2)-H(2A)     | 120.3    |
| C(2)-C(3)-H(3)      | 120.5    |
| C(2)-C(3)-C(4)      | 118.9(3) |
| C(4)-C(3)-H(3)      | 120.5    |
| C(3)-C(4)-C(5)      | 122.9(3) |
| C(9)-C(4)-C(3)      | 117.7(3) |
| C(9)-C(4)-C(5)      | 119.4(3) |
| O(2)-C(5)-C(4)      | 114.6(3) |
| C(6)-C(5)-O(2)      | 125.6(3) |
| C(6)-C(5)-C(4)      | 119.8(3) |
| C(5)-C(6)-H(6)      | 119.6    |
| C(5)-C(6)-C(7)      | 120.8(3) |
| C(7)-C(6)-H(6)      | 119.6    |
| C(6)-C(7)-H(7)      | 119.5    |
| C(8)-C(7)-C(6)      | 121.0(3) |
| C(8)-C(7)-H(7)      | 119.5    |
| N(2)-C(8)-C(9)      | 114.6(2) |
| C(7)-C(8)-N(2)      | 126.1(3) |
| C(7)-C(8)-C(9)      | 119.3(3) |
| N(1)-C(9)-C(4)      | 122.8(3) |
| N(1)-C(9)-C(8)      | 117.5(3) |
| C(4)-C(9)-C(8)      | 119.8(3) |
| O(1)-C(10)-N(2)     | 122.9(3) |
| O(1)-C(10)-C(11)    | 122.1(3) |
| N(2)-C(10)-C(11)    | 115.1(3) |
| C(10)-C(11)-H(11A)  | 109.2    |
| C(10)-C(11)-H(11B)  | 109.2    |
| C(10)-C(11)-C(12)   | 111.9(2) |
| H(11A)-C(11)-H(11B) | 107.9    |
| C(12)-C(11)-H(11A)  | 109.2    |
| C(12)-C(11)-H(11B)  | 109.2    |
| C(11)-C(12)-H(12)   | 109.0    |
| C(11)-C(12)-C(13)   | 111.3(2) |
| C(11)-C(12)-B(1)    | 107.9(2) |

|                     |          |
|---------------------|----------|
| C(13)-C(12)-H(12)   | 109.0    |
| C(13)-C(12)-B(1)    | 110.5(2) |
| B(1)-C(12)-H(12)    | 109.0    |
| C(12)-C(13)-H(13)   | 106.7    |
| C(12)-C(13)-C(24)   | 113.8(2) |
| C(14)-C(13)-C(12)   | 111.9(2) |
| C(14)-C(13)-H(13)   | 106.7    |
| C(14)-C(13)-C(24)   | 110.6(2) |
| C(24)-C(13)-H(13)   | 106.7    |
| C(15)-C(14)-C(13)   | 128.1(3) |
| C(21)-C(14)-C(13)   | 125.7(3) |
| C(21)-C(14)-C(15)   | 106.2(3) |
| C(16)-C(15)-C(14)   | 135.1(3) |
| C(16)-C(15)-C(20)   | 118.1(3) |
| C(20)-C(15)-C(14)   | 106.8(3) |
| C(15)-C(16)-H(16)   | 120.3    |
| C(17)-C(16)-C(15)   | 119.3(3) |
| C(17)-C(16)-H(16)   | 120.3    |
| C(16)-C(17)-H(17)   | 119.4    |
| C(16)-C(17)-C(18)   | 121.1(3) |
| C(18)-C(17)-H(17)   | 119.4    |
| C(17)-C(18)-H(18)   | 119.3    |
| C(19)-C(18)-C(17)   | 121.3(3) |
| C(19)-C(18)-H(18)   | 119.3    |
| C(18)-C(19)-H(19)   | 121.3    |
| C(18)-C(19)-C(20)   | 117.3(3) |
| C(20)-C(19)-H(19)   | 121.3    |
| N(3)-C(20)-C(15)    | 108.1(2) |
| N(3)-C(20)-C(19)    | 129.2(3) |
| C(19)-C(20)-C(15)   | 122.7(3) |
| N(3)-C(21)-H(21)    | 124.5    |
| C(14)-C(21)-N(3)    | 110.9(3) |
| C(14)-C(21)-H(21)   | 124.5    |
| N(3)-C(22)-H(22A)   | 109.5    |
| N(3)-C(22)-H(22B)   | 109.5    |
| N(3)-C(22)-H(22C)   | 109.5    |
| H(22A)-C(22)-H(22B) | 109.5    |
| H(22A)-C(22)-H(22C) | 109.5    |
| H(22B)-C(22)-H(22C) | 109.5    |
| O(2)-C(23)-H(23A)   | 109.5    |
| O(2)-C(23)-H(23B)   | 109.5    |
| O(2)-C(23)-H(23C)   | 109.5    |
| H(23A)-C(23)-H(23B) | 109.5    |
| H(23A)-C(23)-H(23C) | 109.5    |
| H(23B)-C(23)-H(23C) | 109.5    |
| C(13)-C(24)-H(24A)  | 109.1    |
| C(13)-C(24)-H(24B)  | 109.1    |
| H(24A)-C(24)-H(24B) | 107.8    |
| C(25)-C(24)-C(13)   | 112.5(3) |
| C(25)-C(24)-H(24A)  | 109.1    |
| C(25)-C(24)-H(24B)  | 109.1    |
| C(24)-C(25)-H(25A)  | 109.5    |
| C(24)-C(25)-H(25B)  | 109.5    |
| C(24)-C(25)-H(25C)  | 109.5    |
| H(25A)-C(25)-H(25B) | 109.5    |
| H(25A)-C(25)-H(25C) | 109.5    |
| H(25B)-C(25)-H(25C) | 109.5    |
| O(4)-C(26)-C(27)    | 101.9(2) |
| O(4)-C(26)-C(28)    | 109.3(3) |
| O(4)-C(26)-C(29)    | 105.9(3) |



|                     |          |
|---------------------|----------|
| C(28)-C(26)-C(27)   | 116.0(3) |
| C(28)-C(26)-C(29)   | 110.9(3) |
| C(29)-C(26)-C(27)   | 112.0(3) |
| O(3)-C(27)-C(26)    | 102.5(2) |
| O(3)-C(27)-C(30)    | 106.3(3) |
| O(3)-C(27)-C(31)    | 109.7(3) |
| C(30)-C(27)-C(26)   | 112.5(3) |
| C(31)-C(27)-C(26)   | 115.8(3) |
| C(31)-C(27)-C(30)   | 109.6(3) |
| C(26)-C(28)-H(28A)  | 109.5    |
| C(26)-C(28)-H(28B)  | 109.5    |
| C(26)-C(28)-H(28C)  | 109.5    |
| H(28A)-C(28)-H(28B) | 109.5    |
| H(28A)-C(28)-H(28C) | 109.5    |
| H(28B)-C(28)-H(28C) | 109.5    |
| C(26)-C(29)-H(29A)  | 109.5    |
| C(26)-C(29)-H(29B)  | 109.5    |
| C(26)-C(29)-H(29C)  | 109.5    |
| H(29A)-C(29)-H(29B) | 109.5    |
| H(29A)-C(29)-H(29C) | 109.5    |
| H(29B)-C(29)-H(29C) | 109.5    |
| C(27)-C(30)-H(30A)  | 109.5    |
| C(27)-C(30)-H(30B)  | 109.5    |
| C(27)-C(30)-H(30C)  | 109.5    |
| H(30A)-C(30)-H(30B) | 109.5    |
| H(30A)-C(30)-H(30C) | 109.5    |
| H(30B)-C(30)-H(30C) | 109.5    |
| C(27)-C(31)-H(31A)  | 109.5    |
| C(27)-C(31)-H(31B)  | 109.5    |
| C(27)-C(31)-H(31C)  | 109.5    |
| H(31A)-C(31)-H(31B) | 109.5    |
| H(31A)-C(31)-H(31C) | 109.5    |
| H(31B)-C(31)-H(31C) | 109.5    |
| O(3)-B(1)-C(12)     | 120.3(3) |
| O(4)-B(1)-O(3)      | 112.9(3) |
| O(4)-B(1)-C(12)     | 126.7(3) |

**Table S14.** Anisotropic displacement parameters ( $\text{\AA}^2 \times 10^3$ ) for **4g**. The anisotropic displacement factor exponent takes the form:  $-2^2 [h^2 a^* U^{11} + \dots + 2 h k a^* b^* U^{12}]$ .

|      | $U^{11}$ | $U^{22}$ | $U^{33}$ | $U^{23}$ | $U^{13}$ | $U^{12}$ |
|------|----------|----------|----------|----------|----------|----------|
| O(1) | 32(1)    | 29(1)    | 30(1)    | -10(1)   | 12(1)    | -3(1)    |
| O(2) | 30(1)    | 28(1)    | 35(1)    | -1(1)    | 13(1)    | -6(1)    |
| O(3) | 37(1)    | 23(1)    | 20(1)    | 3(1)     | 8(1)     | 6(1)     |
| O(4) | 47(2)    | 26(1)    | 21(1)    | 2(1)     | 10(1)    | 8(1)     |
| N(1) | 31(2)    | 23(1)    | 22(1)    | 0(1)     | 9(1)     | 3(1)     |
| N(2) | 28(2)    | 24(1)    | 22(1)    | -6(1)    | 9(1)     | -3(1)    |
| N(3) | 26(2)    | 22(1)    | 24(1)    | -2(1)    | 2(1)     | -1(1)    |
| C(1) | 36(2)    | 28(2)    | 24(2)    | -1(1)    | 12(1)    | 3(1)     |
| C(2) | 41(2)    | 25(2)    | 27(2)    | -4(1)    | 10(1)    | 4(1)     |
| C(3) | 32(2)    | 20(2)    | 28(2)    | -2(1)    | 5(1)     | -1(1)    |
| C(4) | 25(2)    | 20(2)    | 22(2)    | 2(1)     | 4(1)     | 3(1)     |
| C(5) | 25(2)    | 24(2)    | 23(2)    | 2(1)     | 3(1)     | -2(1)    |
| C(6) | 25(2)    | 30(2)    | 23(2)    | 0(1)     | 7(1)     | 1(1)     |
| C(7) | 29(2)    | 26(2)    | 22(2)    | -4(1)    | 6(1)     | 2(1)     |
| C(8) | 27(2)    | 19(2)    | 19(1)    | 0(1)     | 3(1)     | 0(1)     |
| C(9) | 28(2)    | 20(2)    | 17(1)    | 2(1)     | 3(1)     | 3(1)     |

|       |        |       |       |       |        |        |
|-------|--------|-------|-------|-------|--------|--------|
| C(10) | 26(2)  | 20(2) | 21(1) | 0(1)  | 2(1)   | 1(1)   |
| C(11) | 29(2)  | 24(2) | 19(1) | -1(1) | 3(1)   | -2(1)  |
| C(12) | 26(2)  | 19(2) | 21(2) | -1(1) | 4(1)   | 1(1)   |
| C(13) | 28(2)  | 19(2) | 19(1) | -1(1) | 5(1)   | -1(1)  |
| C(14) | 28(2)  | 18(2) | 20(1) | 1(1)  | 7(1)   | -2(1)  |
| C(15) | 28(2)  | 19(2) | 23(2) | 3(1)  | 10(1)  | 0(1)   |
| C(16) | 28(2)  | 23(2) | 29(2) | 3(1)  | 8(1)   | 2(1)   |
| C(17) | 36(2)  | 26(2) | 38(2) | 2(1)  | 16(2)  | 5(1)   |
| C(18) | 45(2)  | 22(2) | 33(2) | -5(1) | 17(2)  | -2(1)  |
| C(19) | 36(2)  | 25(2) | 28(2) | -5(1) | 11(1)  | -4(1)  |
| C(20) | 30(2)  | 21(2) | 22(2) | 0(1)  | 8(1)   | -2(1)  |
| C(21) | 33(2)  | 18(2) | 20(1) | 0(1)  | 7(1)   | 2(1)   |
| C(22) | 33(2)  | 36(2) | 26(2) | -4(1) | -2(1)  | 2(1)   |
| C(23) | 31(2)  | 32(2) | 34(2) | 5(1)  | 11(1)  | 0(1)   |
| C(24) | 37(2)  | 28(2) | 21(2) | 3(1)  | 6(1)   | -1(1)  |
| C(25) | 46(2)  | 33(2) | 33(2) | 6(2)  | 17(2)  | -1(2)  |
| C(26) | 54(2)  | 27(2) | 20(2) | 4(1)  | 8(2)   | 2(2)   |
| C(27) | 44(2)  | 29(2) | 24(2) | 9(1)  | 11(2)  | 7(1)   |
| C(28) | 105(4) | 59(3) | 38(2) | 16(2) | 39(2)  | 29(3)  |
| C(29) | 66(3)  | 55(3) | 41(2) | 13(2) | -17(2) | -13(2) |
| C(30) | 60(3)  | 52(3) | 53(2) | 20(2) | 1(2)   | -22(2) |
| C(31) | 80(3)  | 43(2) | 34(2) | 11(2) | 13(2)  | 27(2)  |
| B(1)  | 24(2)  | 24(2) | 22(2) | 0(1)  | 4(1)   | -2(1)  |

**Table S15.** Hydrogen coordinates ( $\times 10^4$ ) and isotropic displacement parameters ( $\text{\AA}^2 \times 10^3$ ) for **4g**.

|        | x        | y        | z        | U(eq)  |
|--------|----------|----------|----------|--------|
| H(2)   | 2740(50) | 4264(15) | -140(40) | 35(10) |
| H(1)   | 2878     | 3045     | -2816    | 34     |
| H(2A)  | 498      | 2321     | -3077    | 37     |
| H(3)   | -2012    | 2309     | -1667    | 33     |
| H(6)   | -3534    | 3526     | 1857     | 31     |
| H(7)   | -1071    | 4239     | 1983     | 31     |
| H(11A) | 3575     | 5371     | 189      | 29     |
| H(11B) | 5222     | 4883     | 741      | 29     |
| H(12)  | 4309     | 5763     | 2569     | 27     |
| H(13)  | 8261     | 5406     | 2047     | 27     |
| H(16)  | 4909     | 6731     | 3226     | 32     |
| H(17)  | 4848     | 7502     | 4720     | 38     |
| H(18)  | 7727     | 7721     | 6694     | 38     |
| H(19)  | 10698    | 7150     | 7312     | 35     |
| H(21)  | 11343    | 5585     | 4223     | 29     |
| H(22A) | 13895    | 6572     | 6783     | 50     |
| H(22B) | 14057    | 5930     | 6486     | 50     |
| H(22C) | 12913    | 6140     | 7732     | 50     |
| H(23A) | -6018    | 2257     | 1063     | 48     |
| H(23B) | -6155    | 2911     | 1063     | 48     |
| H(23C) | -4326    | 2604     | 2269     | 48     |
| H(24A) | 6043     | 5919     | -41      | 35     |
| H(24B) | 6407     | 6445     | 1032     | 35     |
| H(25A) | 9681     | 5869     | 116      | 54     |
| H(25B) | 10110    | 6375     | 1260     | 54     |
| H(25C) | 8838     | 6467     | -449     | 54     |
| H(28A) | 5714     | 5025     | 8097     | 96     |
| H(28B) | 6026     | 4375     | 8089     | 96     |
| H(28C) | 3952     | 4648     | 7039     | 96     |

|        |      |      |      |    |
|--------|------|------|------|----|
| H(29A) | 9601 | 4915 | 6037 | 89 |
| H(29B) | 9580 | 4616 | 7583 | 89 |
| H(29C) | 9001 | 5253 | 7365 | 89 |
| H(30A) | 3015 | 4283 | 4579 | 86 |
| H(30B) | 3987 | 3812 | 5762 | 86 |
| H(30C) | 3928 | 3734 | 4023 | 86 |
| H(31A) | 7693 | 3560 | 4653 | 79 |
| H(31B) | 7933 | 3654 | 6410 | 79 |
| H(31C) | 9350 | 4000 | 5550 | 79 |

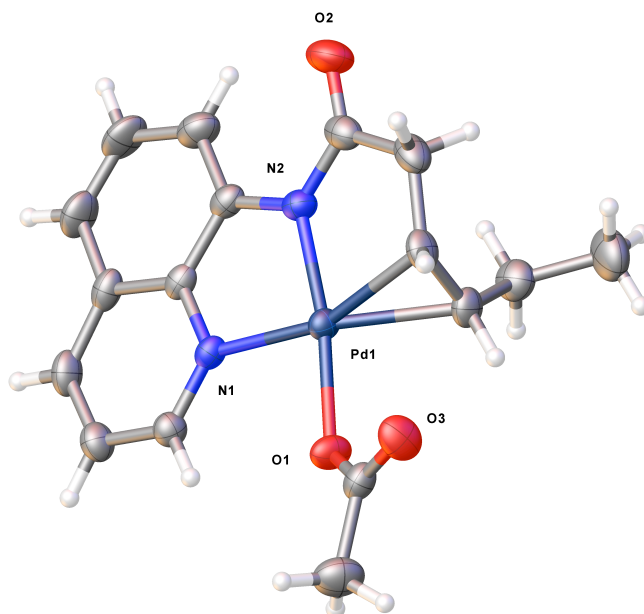

**Table S16.** Crystal data and structure refinement for **Pd-I**.

|                                 |                                       |                               |
|---------------------------------|---------------------------------------|-------------------------------|
| Report date                     | 2016-05-26                            |                               |
| Identification code             | AQ-Et-Pd                              |                               |
| Empirical formula               | C17 H18 N2 O3 Pd                      |                               |
| Molecular formula               | C17 H18 N2 O3 Pd                      |                               |
| Formula weight                  | 404.73                                |                               |
| Temperature                     | 100 K                                 |                               |
| Wavelength                      | 0.71073 Å                             |                               |
| Crystal system                  | Monoclinic                            |                               |
| Space group                     | P 1 21/n 1                            |                               |
| Unit cell dimensions            | a = 8.6104(4) Å                       | $\alpha = 90^\circ$ .         |
|                                 | b = 10.5955(5) Å                      | $\beta = 99.0510(10)^\circ$ . |
|                                 | c = 17.7100(9) Å                      | $\gamma = 90^\circ$ .         |
| Volume                          | 1595.59(13) Å <sup>3</sup>            |                               |
| Z                               | 4                                     |                               |
| Density (calculated)            | 1.685 Mg/m <sup>3</sup>               |                               |
| Absorption coefficient          | 1.179 mm <sup>-1</sup>                |                               |
| F(000)                          | 816                                   |                               |
| Crystal size                    | 0.347 x 0.295 x 0.261 mm <sup>3</sup> |                               |
| Crystal color, habit            | Yellow Block                          |                               |
| Theta range for data collection | 2.493 to 25.347°                      |                               |
| Index ranges                    | -8<=h<=10, -12<=k<=12, -21<=l<=21     |                               |
| Reflections collected           | 16069                                 |                               |
| Independent reflections         | 2929 [R(int) = 0.0238]                |                               |
| Completeness to theta = 25.000° | 99.9 %                                |                               |
| Absorption correction           | Semi-empirical from equivalents       |                               |
| Max. and min. transmission      | 0.2590 and 0.2292                     |                               |

|                                   |                                             |
|-----------------------------------|---------------------------------------------|
| Refinement method                 | Full-matrix least-squares on F <sup>2</sup> |
| Data / restraints / parameters    | 2929 / 0 / 210                              |
| Goodness-of-fit on F <sup>2</sup> | 1.141                                       |
| Final R indices [I>2sigma(I)]     | R1 = 0.0214, wR2 = 0.0516                   |
| R indices (all data)              | R1 = 0.0240, wR2 = 0.0529                   |
| Extinction coefficient            | n/a                                         |
| Largest diff. peak and hole       | 0.338 and -0.367 e.Å <sup>-3</sup>          |

**Table S17.** Atomic coordinates (x 10<sup>4</sup>) and equivalent isotropic displacement parameters (Å<sup>2</sup>x 10<sup>3</sup>) for **Pd-I**. U(eq) is defined as one third of the trace of the orthogonalized U<sup>ij</sup> tensor.

|       | x       | y       | z       | U(eq) |
|-------|---------|---------|---------|-------|
| Pd(1) | 6604(1) | 7152(1) | 4372(1) | 25(1) |
| O(1)  | 8343(2) | 7913(2) | 5139(1) | 35(1) |
| O(2)  | 2747(2) | 6109(2) | 2825(1) | 49(1) |
| O(3)  | 7307(2) | 9803(2) | 5286(1) | 43(1) |
| N(1)  | 7225(2) | 5422(2) | 4823(1) | 25(1) |
| N(2)  | 5021(2) | 6147(2) | 3703(1) | 29(1) |
| C(1)  | 8350(3) | 5151(2) | 5398(1) | 29(1) |
| C(2)  | 8767(3) | 3899(2) | 5595(1) | 34(1) |
| C(3)  | 7983(3) | 2937(2) | 5193(2) | 36(1) |
| C(4)  | 6753(3) | 3191(2) | 4593(1) | 32(1) |
| C(5)  | 6398(3) | 4472(2) | 4414(1) | 25(1) |
| C(6)  | 5207(3) | 4826(2) | 3804(1) | 29(1) |
| C(7)  | 4387(3) | 3876(3) | 3382(2) | 41(1) |
| C(8)  | 4713(4) | 2597(3) | 3565(2) | 48(1) |
| C(9)  | 5852(4) | 2252(2) | 4150(2) | 43(1) |
| C(10) | 3787(3) | 6679(3) | 3239(1) | 35(1) |
| C(11) | 3775(3) | 8115(3) | 3290(2) | 40(1) |
| C(12) | 5140(3) | 8685(2) | 3818(1) | 33(1) |
| C(13) | 6605(3) | 8808(2) | 3609(1) | 32(1) |
| C(14) | 6979(3) | 8477(3) | 2834(2) | 41(1) |
| C(15) | 6670(4) | 9626(3) | 2305(2) | 60(1) |
| C(16) | 8298(3) | 8989(2) | 5468(1) | 31(1) |
| C(17) | 9603(3) | 9183(3) | 6134(2) | 51(1) |

**Table S18.** Bond lengths [Å] and angles [°] for **Pd-I**.

|             |            |
|-------------|------------|
| Pd(1)-O(1)  | 2.0243(17) |
| Pd(1)-N(1)  | 2.0382(18) |
| Pd(1)-N(2)  | 1.9712(19) |
| Pd(1)-C(12) | 2.191(2)   |
| Pd(1)-C(13) | 2.214(2)   |
| O(1)-C(16)  | 1.283(3)   |
| O(2)-C(10)  | 1.224(3)   |
| O(3)-C(16)  | 1.220(3)   |
| N(1)-C(1)   | 1.321(3)   |
| N(1)-C(5)   | 1.372(3)   |
| N(2)-C(6)   | 1.417(3)   |
| N(2)-C(10)  | 1.359(3)   |
| C(1)-H(1)   | 0.9500     |
| C(1)-C(2)   | 1.404(3)   |
| C(2)-H(2)   | 0.9500     |
| C(2)-C(3)   | 1.360(4)   |
| C(3)-H(3)   | 0.9500     |
| C(3)-C(4)   | 1.403(4)   |

|                   |            |
|-------------------|------------|
| C(4)-C(5)         | 1.416(3)   |
| C(4)-C(9)         | 1.420(4)   |
| C(5)-C(6)         | 1.417(3)   |
| C(6)-C(7)         | 1.380(3)   |
| C(7)-H(7)         | 0.9500     |
| C(7)-C(8)         | 1.411(4)   |
| C(8)-H(8)         | 0.9500     |
| C(8)-C(9)         | 1.359(4)   |
| C(9)-H(9)         | 0.9500     |
| C(10)-C(11)       | 1.524(4)   |
| C(11)-H(11A)      | 0.9900     |
| C(11)-H(11B)      | 0.9900     |
| C(11)-C(12)       | 1.507(4)   |
| C(12)-H(12)       | 1.0000     |
| C(12)-C(13)       | 1.375(3)   |
| C(13)-H(13)       | 1.0000     |
| C(13)-C(14)       | 1.500(3)   |
| C(14)-H(14A)      | 0.9900     |
| C(14)-H(14B)      | 0.9900     |
| C(14)-C(15)       | 1.534(4)   |
| C(15)-H(15A)      | 0.9800     |
| C(15)-H(15B)      | 0.9800     |
| C(15)-H(15C)      | 0.9800     |
| C(16)-C(17)       | 1.510(4)   |
| C(17)-H(17A)      | 0.9800     |
| C(17)-H(17B)      | 0.9800     |
| C(17)-H(17C)      | 0.9800     |
| O(1)-Pd(1)-N(1)   | 88.51(7)   |
| O(1)-Pd(1)-C(12)  | 108.56(8)  |
| O(1)-Pd(1)-C(13)  | 91.29(8)   |
| N(1)-Pd(1)-C(12)  | 160.00(9)  |
| N(1)-Pd(1)-C(13)  | 157.97(8)  |
| N(2)-Pd(1)-O(1)   | 170.66(7)  |
| N(2)-Pd(1)-N(1)   | 82.14(8)   |
| N(2)-Pd(1)-C(12)  | 80.62(9)   |
| N(2)-Pd(1)-C(13)  | 97.40(9)   |
| C(12)-Pd(1)-C(13) | 36.39(9)   |
| C(16)-O(1)-Pd(1)  | 125.87(16) |
| C(1)-N(1)-Pd(1)   | 127.78(16) |
| C(1)-N(1)-C(5)    | 120.3(2)   |
| C(5)-N(1)-Pd(1)   | 111.73(15) |
| C(6)-N(2)-Pd(1)   | 113.84(15) |
| C(10)-N(2)-Pd(1)  | 122.68(17) |
| C(10)-N(2)-C(6)   | 123.2(2)   |
| N(1)-C(1)-H(1)    | 119.2      |
| N(1)-C(1)-C(2)    | 121.7(2)   |
| C(2)-C(1)-H(1)    | 119.2      |
| C(1)-C(2)-H(2)    | 120.3      |
| C(3)-C(2)-C(1)    | 119.4(2)   |
| C(3)-C(2)-H(2)    | 120.3      |
| C(2)-C(3)-H(3)    | 119.8      |
| C(2)-C(3)-C(4)    | 120.4(2)   |
| C(4)-C(3)-H(3)    | 119.8      |
| C(3)-C(4)-C(5)    | 117.6(2)   |
| C(3)-C(4)-C(9)    | 124.5(2)   |
| C(5)-C(4)-C(9)    | 117.9(2)   |
| N(1)-C(5)-C(4)    | 120.6(2)   |
| N(1)-C(5)-C(6)    | 117.5(2)   |
| C(4)-C(5)-C(6)    | 121.9(2)   |

|                     |            |
|---------------------|------------|
| C(5)-C(6)-N(2)      | 114.29(19) |
| C(7)-C(6)-N(2)      | 127.9(2)   |
| C(7)-C(6)-C(5)      | 117.8(2)   |
| C(6)-C(7)-H(7)      | 119.7      |
| C(6)-C(7)-C(8)      | 120.6(3)   |
| C(8)-C(7)-H(7)      | 119.7      |
| C(7)-C(8)-H(8)      | 119.1      |
| C(9)-C(8)-C(7)      | 121.8(2)   |
| C(9)-C(8)-H(8)      | 119.1      |
| C(4)-C(9)-H(9)      | 120.0      |
| C(8)-C(9)-C(4)      | 119.9(3)   |
| C(8)-C(9)-H(9)      | 120.0      |
| O(2)-C(10)-N(2)     | 125.9(3)   |
| O(2)-C(10)-C(11)    | 121.1(2)   |
| N(2)-C(10)-C(11)    | 112.9(2)   |
| C(10)-C(11)-H(11A)  | 108.5      |
| C(10)-C(11)-H(11B)  | 108.5      |
| H(11A)-C(11)-H(11B) | 107.5      |
| C(12)-C(11)-C(10)   | 115.2(2)   |
| C(12)-C(11)-H(11A)  | 108.5      |
| C(12)-C(11)-H(11B)  | 108.5      |
| Pd(1)-C(12)-H(12)   | 115.2      |
| C(11)-C(12)-Pd(1)   | 108.51(16) |
| C(11)-C(12)-H(12)   | 115.2      |
| C(13)-C(12)-Pd(1)   | 72.71(14)  |
| C(13)-C(12)-C(11)   | 122.0(2)   |
| C(13)-C(12)-H(12)   | 115.2      |
| Pd(1)-C(13)-H(13)   | 113.8      |
| C(12)-C(13)-Pd(1)   | 70.90(14)  |
| C(12)-C(13)-H(13)   | 113.8      |
| C(12)-C(13)-C(14)   | 124.2(2)   |
| C(14)-C(13)-Pd(1)   | 113.20(17) |
| C(14)-C(13)-H(13)   | 113.8      |
| C(13)-C(14)-H(14A)  | 109.8      |
| C(13)-C(14)-H(14B)  | 109.8      |
| C(13)-C(14)-C(15)   | 109.4(2)   |
| H(14A)-C(14)-H(14B) | 108.2      |
| C(15)-C(14)-H(14A)  | 109.8      |
| C(15)-C(14)-H(14B)  | 109.8      |
| C(14)-C(15)-H(15A)  | 109.5      |
| C(14)-C(15)-H(15B)  | 109.5      |
| C(14)-C(15)-H(15C)  | 109.5      |
| H(15A)-C(15)-H(15B) | 109.5      |
| H(15A)-C(15)-H(15C) | 109.5      |
| H(15B)-C(15)-H(15C) | 109.5      |
| O(1)-C(16)-C(17)    | 113.8(2)   |
| O(3)-C(16)-O(1)     | 125.3(2)   |
| O(3)-C(16)-C(17)    | 120.9(2)   |
| C(16)-C(17)-H(17A)  | 109.5      |
| C(16)-C(17)-H(17B)  | 109.5      |
| C(16)-C(17)-H(17C)  | 109.5      |
| H(17A)-C(17)-H(17B) | 109.5      |
| H(17A)-C(17)-H(17C) | 109.5      |
| H(17B)-C(17)-H(17C) | 109.5      |

---

**Table S19.** Anisotropic displacement parameters ( $\text{\AA}^2 \times 10^3$ ) for **Pd-I**. The anisotropic displacement factor exponent takes the form:  $-2p^2[ h^2 a^*U^{11} + \dots + 2 h k a^* b^* U^{12} ]$ .

---

|       | U <sup>11</sup> | U <sup>22</sup> | U <sup>33</sup> | U <sup>23</sup> | U <sup>13</sup> | U <sup>12</sup> |
|-------|-----------------|-----------------|-----------------|-----------------|-----------------|-----------------|
| Pd(1) | 26(1)           | 20(1)           | 29(1)           | -2(1)           | 4(1)            | 1(1)            |
| O(1)  | 34(1)           | 22(1)           | 47(1)           | -7(1)           | -2(1)           | 0(1)            |
| O(2)  | 40(1)           | 63(1)           | 41(1)           | -2(1)           | -8(1)           | -4(1)           |
| O(3)  | 55(1)           | 29(1)           | 45(1)           | -6(1)           | 4(1)            | 10(1)           |
| N(1)  | 27(1)           | 20(1)           | 28(1)           | -4(1)           | 9(1)            | -2(1)           |
| N(2)  | 26(1)           | 31(1)           | 28(1)           | -2(1)           | 3(1)            | -3(1)           |
| C(1)  | 32(1)           | 26(1)           | 30(1)           | -1(1)           | 5(1)            | 1(1)            |
| C(2)  | 37(1)           | 30(1)           | 35(1)           | 4(1)            | 7(1)            | 6(1)            |
| C(3)  | 48(2)           | 22(1)           | 40(1)           | 4(1)            | 16(1)           | 4(1)            |
| C(4)  | 43(1)           | 22(1)           | 35(1)           | -4(1)           | 19(1)           | -5(1)           |
| C(5)  | 30(1)           | 23(1)           | 26(1)           | -6(1)           | 12(1)           | -3(1)           |
| C(6)  | 30(1)           | 30(1)           | 28(1)           | -5(1)           | 10(1)           | -7(1)           |
| C(7)  | 40(2)           | 44(2)           | 38(1)           | -10(1)          | 4(1)            | -12(1)          |
| C(8)  | 58(2)           | 35(2)           | 52(2)           | -18(1)          | 12(2)           | -21(1)          |
| C(9)  | 58(2)           | 23(1)           | 50(2)           | -7(1)           | 15(1)           | -10(1)          |
| C(10) | 29(1)           | 48(2)           | 28(1)           | 2(1)            | 6(1)            | 1(1)            |
| C(11) | 32(1)           | 49(2)           | 39(1)           | 12(1)           | 7(1)            | 10(1)           |
| C(12) | 40(1)           | 24(1)           | 36(1)           | 6(1)            | 9(1)            | 10(1)           |
| C(13) | 41(1)           | 21(1)           | 37(1)           | 3(1)            | 9(1)            | 0(1)            |
| C(14) | 40(2)           | 47(2)           | 38(1)           | 1(1)            | 13(1)           | -1(1)           |
| C(15) | 65(2)           | 72(2)           | 46(2)           | 18(2)           | 21(2)           | 1(2)            |
| C(16) | 35(1)           | 26(1)           | 34(1)           | -2(1)           | 11(1)           | -5(1)           |
| C(17) | 48(2)           | 47(2)           | 55(2)           | -15(1)          | -1(1)           | -3(1)           |

**Table S20.** Hydrogen coordinates ( $\times 10^4$ ) and isotropic displacement parameters ( $\text{\AA}^2 \times 10^3$ ) for **Pd-I**.

|        | x     | y     | z    | U(eq) |
|--------|-------|-------|------|-------|
| H(1)   | 8891  | 5820  | 5684 | 35    |
| H(2)   | 9589  | 3726  | 6007 | 41    |
| H(3)   | 8271  | 2089  | 5319 | 43    |
| H(7)   | 3596  | 4085  | 2964 | 49    |
| H(8)   | 4121  | 1960  | 3272 | 58    |
| H(9)   | 6045  | 1384  | 4261 | 52    |
| H(11A) | 3766  | 8464  | 2771 | 48    |
| H(11B) | 2788  | 8380  | 3465 | 48    |
| H(12)  | 4854  | 9354  | 4170 | 40    |
| H(13)  | 7220  | 9542  | 3854 | 39    |
| H(14A) | 6316  | 7761  | 2619 | 49    |
| H(14B) | 8095  | 8220  | 2878 | 49    |
| H(15A) | 7376  | 10315 | 2504 | 90    |
| H(15B) | 5576  | 9899  | 2281 | 90    |
| H(15C) | 6860  | 9397  | 1791 | 90    |
| H(17A) | 10535 | 8708  | 6046 | 76    |
| H(17B) | 9260  | 8885  | 6604 | 76    |
| H(17C) | 9863  | 10083 | 6183 | 76    |

## REFERENCES

- (1) Wu, Q.-F.; Shen, P.-X.; He, J.; Wang, X.-B.; Zhang, F.; Shao, Q.; Zhu, R.-Y.; Mapelli, C.; Qiao, J. X.; Poss, M. A.; Yu, J.-Q. Formation of  $\alpha$ -chiral centers by asymmetric  $\beta$ -C(sp<sup>3</sup>)-H arylation, alkenylation, and alkynylation. *Science* **2017**, *355*, 499–503.
- (2) Shen, P.-X.; Hu, L.; Shao, Q.; Hong, K.; Yu, J.-Q. Enantioselective C(sp<sup>3</sup>)-H Arylation of Free Carboxylic Acids. *J. Am. Chem. Soc.* **2018**, *140*, 6545–6549.
- (3) Martinelli, M. J. Asymmetric Diels-Alder reactions with  $\gamma$ -functionalized  $\alpha,\beta$ -unsaturated chiral N-acyloxazolidinones: synthesis of (+)-S-145. *J. Org. Chem.* **1990**, *55*, 5065–5073.
- (4) Mitchell, J. M.; Finney, N. S. An efficient method for the preparation of *N,N*-disubstituted 1,2-diamines. *Tetrahedron Lett.* **2000**, *41*, 8431–8434.
- (5) Jung, M. E.; Huang, Use of Optically Active Cyclic *N,N*-Dialkyl Aminals in Asymmetric Induction. *A. Org. Lett.* **2000**, *2*, 2659–2661.
- (6) Clemens, N.; Sereda, O.; Wilhelm, R. Unexpected behaviour of tosylated and acetylated imidazolium salts. *Org. Biomol. Chem.* **2006**, *4*, 2285–2290.
- (7) Wang, H.; Bai, Z.; Jiao, T.; Deng, Z.; Tong, H.; He, G.; Peng, Q.; Chen, G. Palladium-Catalyzed Amide-Directed Enantioselective Hydrocarbofunctionalization of Unactivated Alkenes Using a Chiral Monodentate Oxazoline Ligand. *J. Am. Chem. Soc.* **2018**, *140*, 3542–3546.
- (8) Williams, C. W.; Shenje, R.; France, S. Catalytic, Interrupted Formal Homo-Nazarov Cyclization with (Hetero)arenes: Access to  $\alpha$ -(Hetero)aryl Cyclohexanones. *J. Org. Chem.* **2016**, *81*, 8253–8267.
- (9) Jacquemard, U.; Bénéteau, V.; Lefoix, M.; Routier, S.; Mérou, J.-Y.; Coudert, G. Mild and selective deprotection of carbamates with Bu<sub>4</sub>NF. *Tetrahedron* **2004**, *60*, 10039–10047.
- (10) Choy, P. Y.; Lau, C. P.; Kwong, F. Y. Palladium-Catalyzed Direct and Regioselective C–H Bond Functionalization/Oxidative Acetoxylation of Indoles. *J. Org. Chem.* **2011**, *76*, 80–84.
- (11) Stavber, S.; Kralj, P.; Zupan, M. Progressive Direct Iodination of Sterically Hindered Alkyl Substituted Benzenes. *Synthesis* **2002**, *11*, 1513–1518.
- (12) Liu, C.; Wang, H.; Xing, X.; Xu, Y.; Ma, J.-A.; Zhang, B. Selective C4–F bond cleavage of pentafluorobenzene: synthesis of N-tetrafluoroarylated heterocyclic compounds. *Tetrahedron Lett.* **2013**, *54*, 4649–4652.
- (13) Sun, X.; Chen, Y.; Wu, N.; Kang, C. S.; Song, H. A.; Jin, S.; Fu, Y.; Bryant, H., Jr.; Frank, J. A.; Chong, H.-S. Application of aziridinium ring opening for preparation of optically active diamine and triamine analogues: Highly efficient synthesis and evaluation of DTPA-based MRI contrast enhancement agents. *RSC Adv.* **2015**, *5*, 94571–94581.
- (14) Richmond, E.; Ling, K. B.; Duguet, N.; Manton, L. B.; Çelebi-Ölçüm, N.; Lam, Y.-H.; Alsancak, S.; Slawin, A. M. Z.; Houk, K. N.; Smith, A. D. An asymmetric pericyclic cascade approach to 3-alkyl-3-aryloxindoles: generality, applications and mechanistic investigations. *Org. Biomol. Chem.* **2015**, *13*, 1807–1817.
- (15) Chen, C.-A.; Wu, K.-H.; Gau, H.-M. Synthesis and application of polymer-supported *N*-sulfonylated aminoalcohols as enantioselective catalysts. *Polymer* **2008**, *49*, 1512–1519.
- (16) Srivastava, V.; Tandon, A.; Ray, S. Convenient and Selective Acetylations of Phenols, Amines and Alcohols. *Synth. Commun.* **1992**, *22*, 2703–2710.
- (17) White, D. E.; Stewart, I. C.; Grubbs, R. H.; Stoltz, B. M. The Catalytic Asymmetric Total Synthesis of Elatol. *J. Am. Chem. Soc.* **2008**, *130*, 810–811.
- (18) Yang, K. S.; Gurak, J. A., Jr.; Liu, Z.; Engle, K. M. Catalytic, Regioselective Hydrocarbofunctionalization of Unactivated Alkenes with Diverse C–H Nucleophiles. *J. Am. Chem. Soc.* **2016**, *138*, 14705–14712.
- (19) Liu, M.; Yang, P.; Karunananda, M. K.; Wang, Y.; Liu, P.; Engle, K. M. C(alkenyl)-H Activation via Six-Membered Palladacycles: Catalytic 1,3-Diene Synthesis. *J. Am. Chem. Soc.* **2018**, *140*, 5805–5813.
- (20) Kim, I. S.; Dong, G. R.; Jung, Y. H. Palladium(II)-Catalyzed Isomerization of Olefins with Tributyltin Hydride. *J. Org. Chem.* **2007**, *72*, 5424–5426.
- (21) Yadagiri, P.; Yadav, J. S. A Convenient Synthesis of (*Z*)-7-Nonadecen-11-One and (*Z*)-7-Eicosen-11-Cne—The Pheromones of Peach Fruit Moth. *Synth. Commun.* **1983**, *13*, 1067–1074.



- (22) Shao, C.; Shi, G.; Zhang, Y.; Pan, S.; Guan, X. Palladium-Catalyzed C–H Ethoxycarbonyldifluoromethylation of Electron-Rich Heteroarenes. *Org. Lett.* **2015**, *17*, 2652–2655.
- (23) Fawcett, A.; Pradeilles, J.; Wang, Y.; Mutsuga, T.; Myers, E. L.; Aggarwal, V. K. Photoinduced decarboxylative borylation of carboxylic acids. *Science* **2017**, *357*, 283–286.
- (24) CCDC 1888952 (**4f**), CCDC 1888953 (**4g**) and CCDC 1888954 (**Pd-I**) contain the supplementary crystallographic data for this paper. These data can be obtained free of charge from The Cambridge Crystallographic Data Centre via [www.ccdc.cam.ac.uk/data\\_request/cif](http://www.ccdc.cam.ac.uk/data_request/cif).
- (25) He, J.; Shao, Q.; Wu, Q.; Yu, J.-Q. Pd(II)-Catalyzed Enantioselective C(sp<sup>3</sup>)–H Borylation. *J. Am. Chem. Soc.* **2017**, *139*, 3344–3347.
- (26) Bonet, A.; Gulyás, H.; Fernández, E. Metal-Free Catalytic Borylation at the  $\beta$ -Position of  $\alpha,\beta$ -Unsaturated Compounds: A Challenging Asymmetric Induction. *Angew. Chem. Int. Ed.* **2010**, *49*, 5130–5134.
- (27) Deguchi, T.; Xin, H.-L.; Morimoto, H.; Ohshima, T. Direct Catalytic Alcoholysis of Unactivated 8-Aminoquinoline Amides. *ACS. Catal.* **2017**, *7*, 3157–3161.
- (28) Verho, O.; Lati, M. P.; Oschmann, M. J. A Two-Step Procedure for the Overall Transamidation of 8-Aminoquinoline Amides Proceeding via the Intermediate *N*-Acyl-Boc-Carbamates. *J. Org. Chem.* **2018**, *83*, 4464–4476.
- (29) Dietz, C.; Hart, T. K.; Nemati, R.; Yao, X.; Nichols, F. C.; Smith, M. B. Structural verification via convergent total synthesis of dipeptide–lipids isolated from *Porphyromonas gingivalis*. *Tetrahedron* **2016**, *72*, 7557–7569.
- (30) Hoye, T. R.; Jeffrey, C. S.; Shao F. Mosher ester analysis for the determination of absolute configuration of stereogenic (chiral) carbinol carbons. *Nat. Protoc.* **2007**, *2*, 2451–2458.

# NMR Spectra and SFC Chromatograms

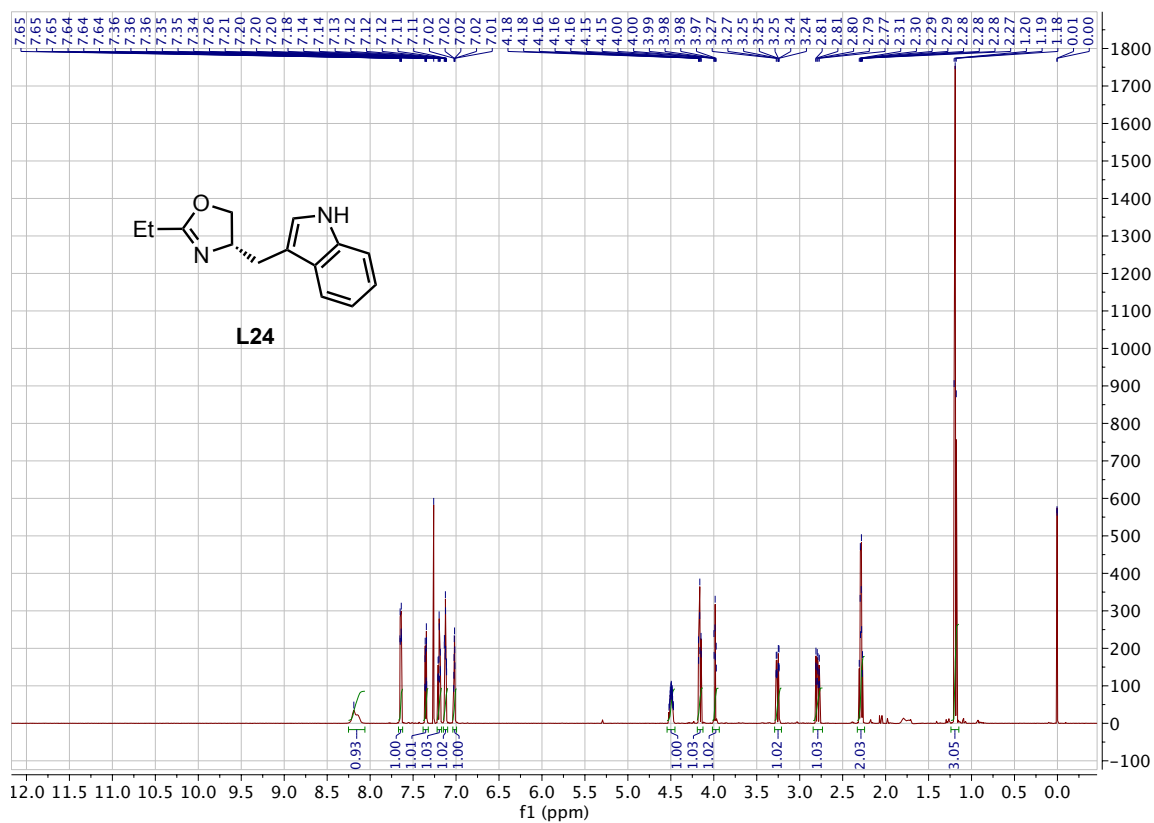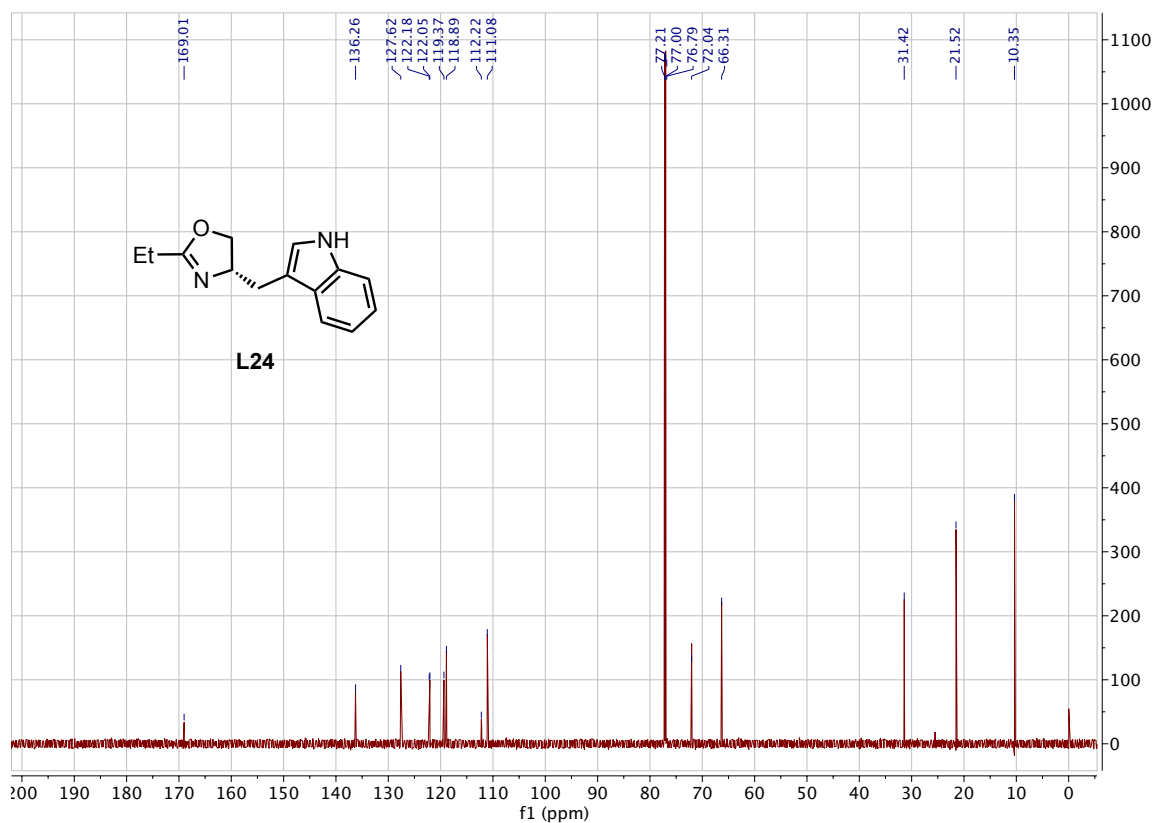

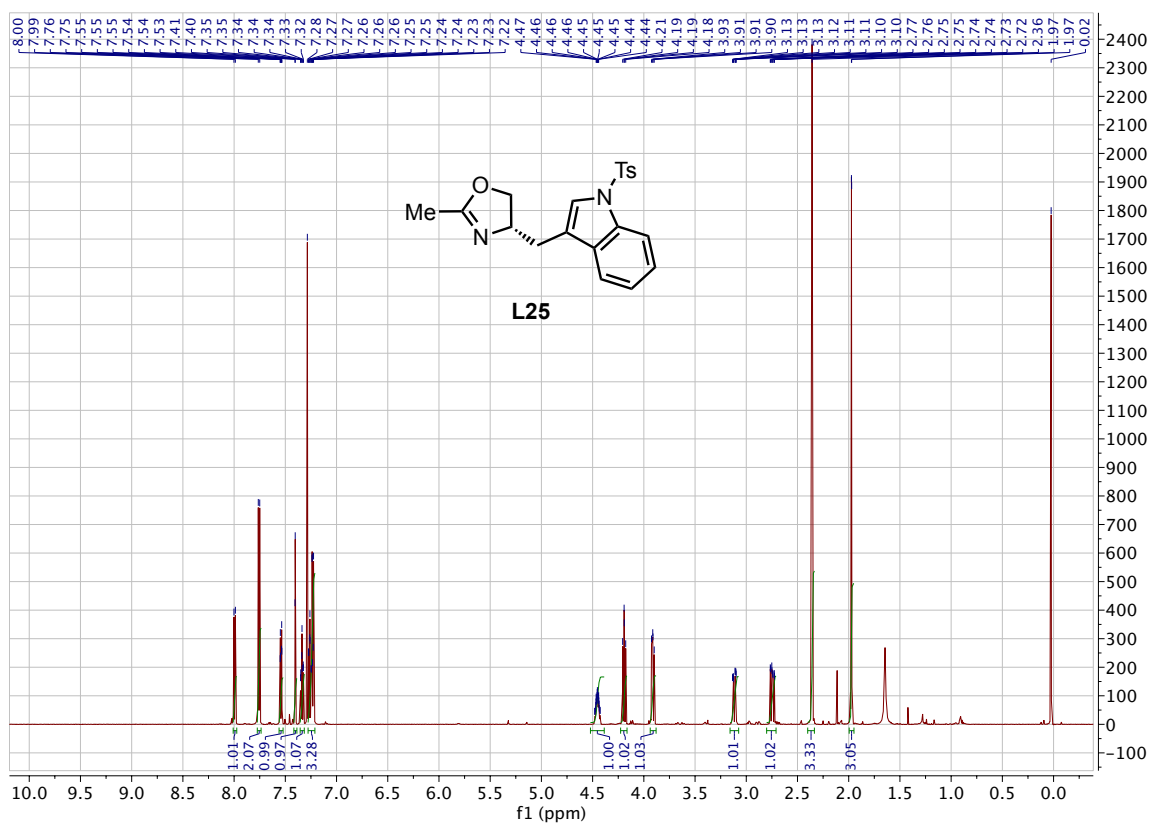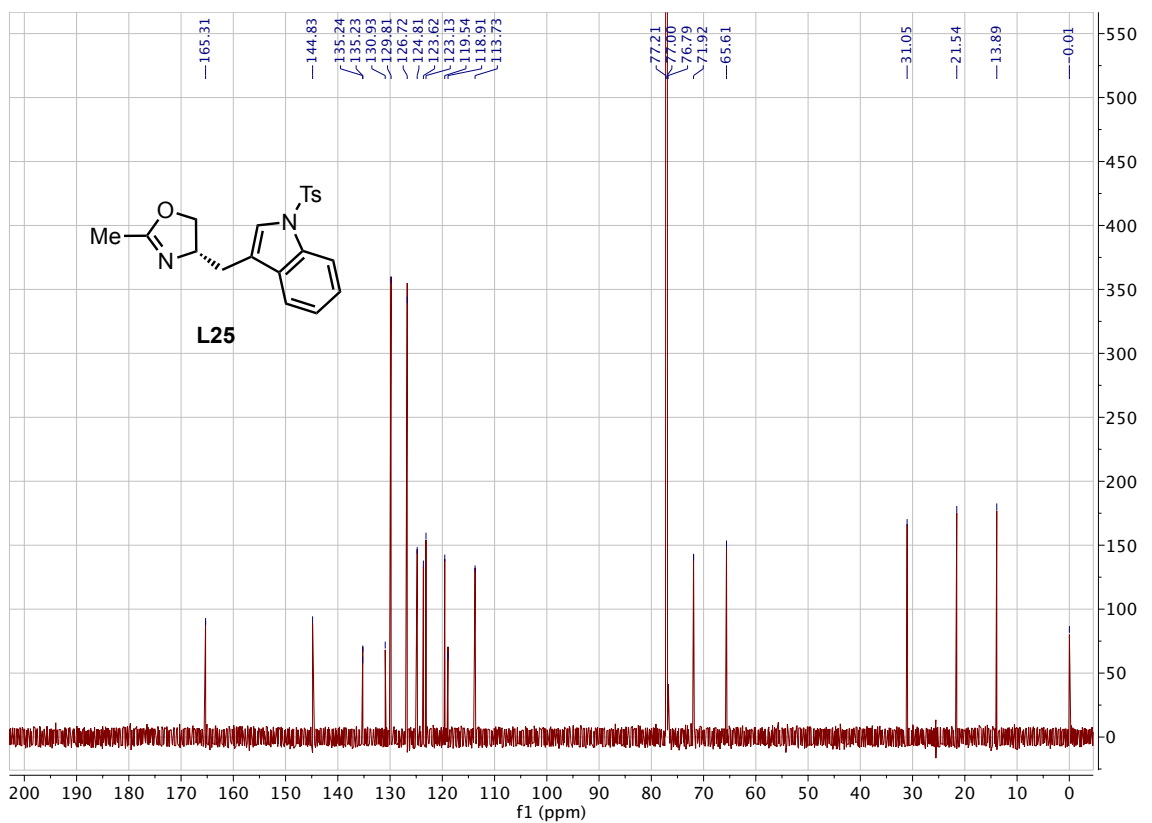

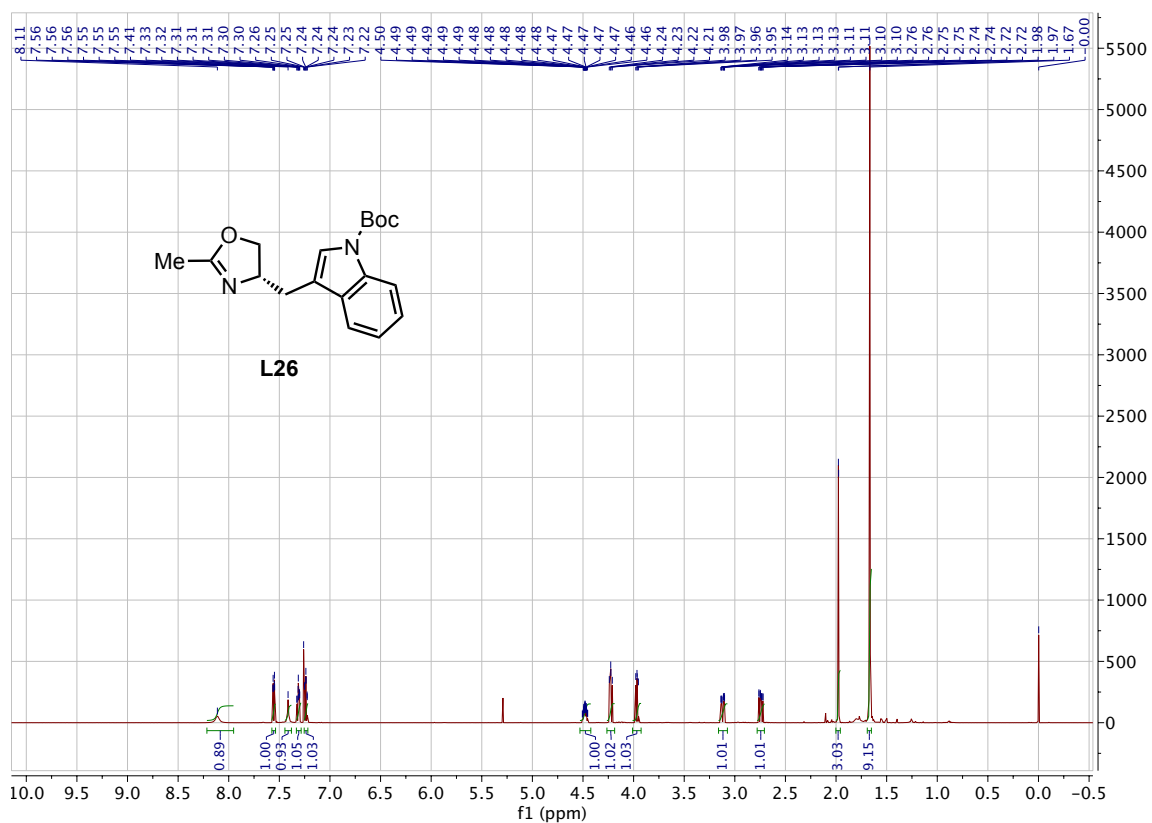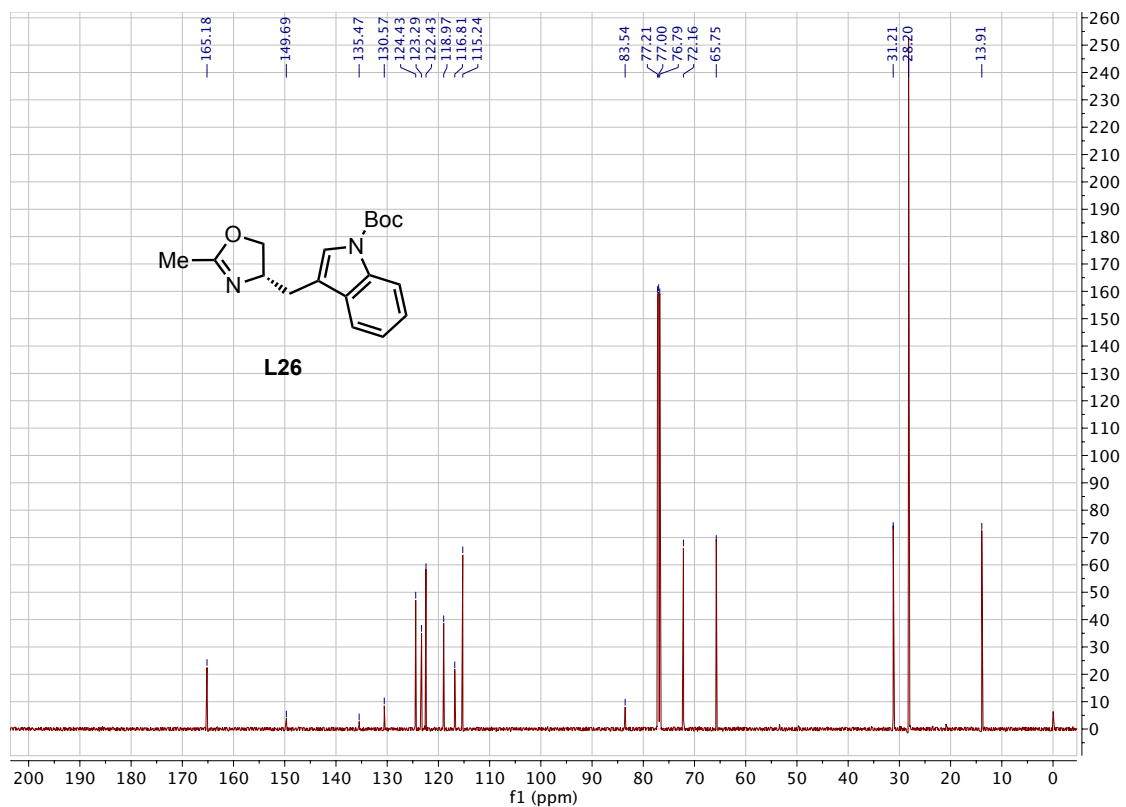

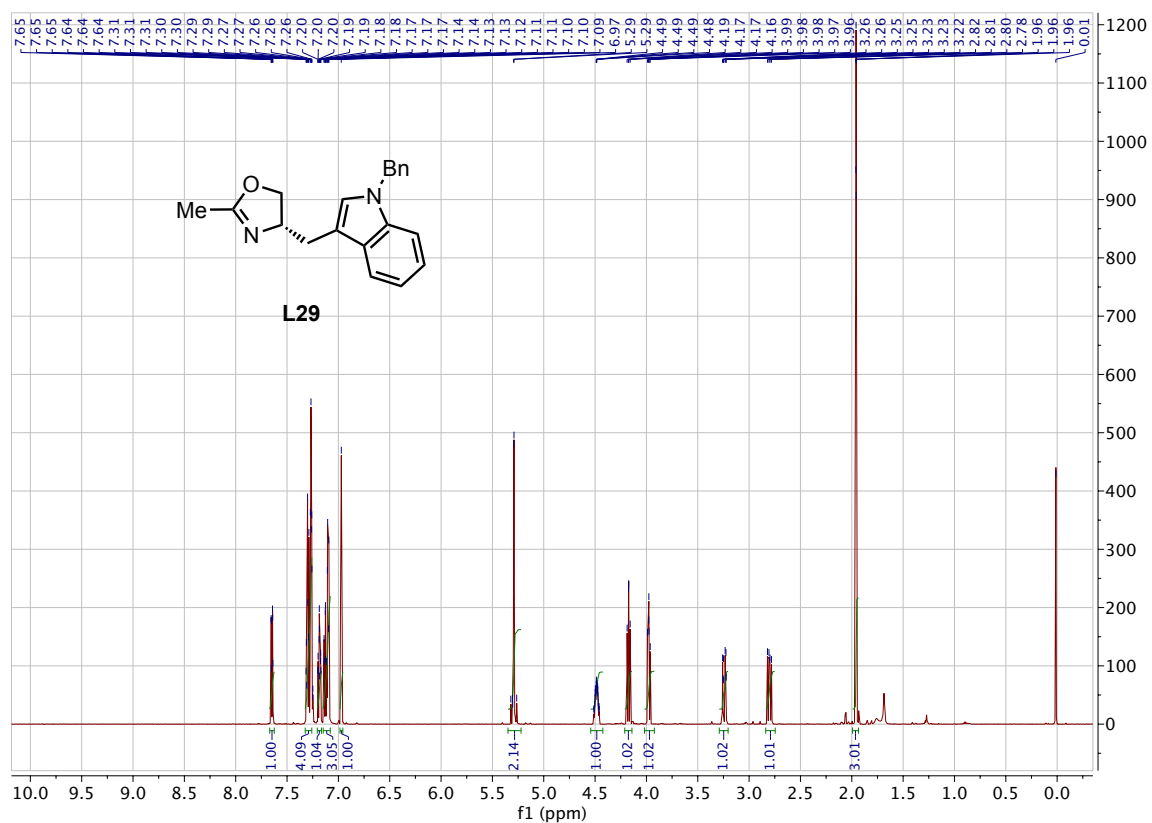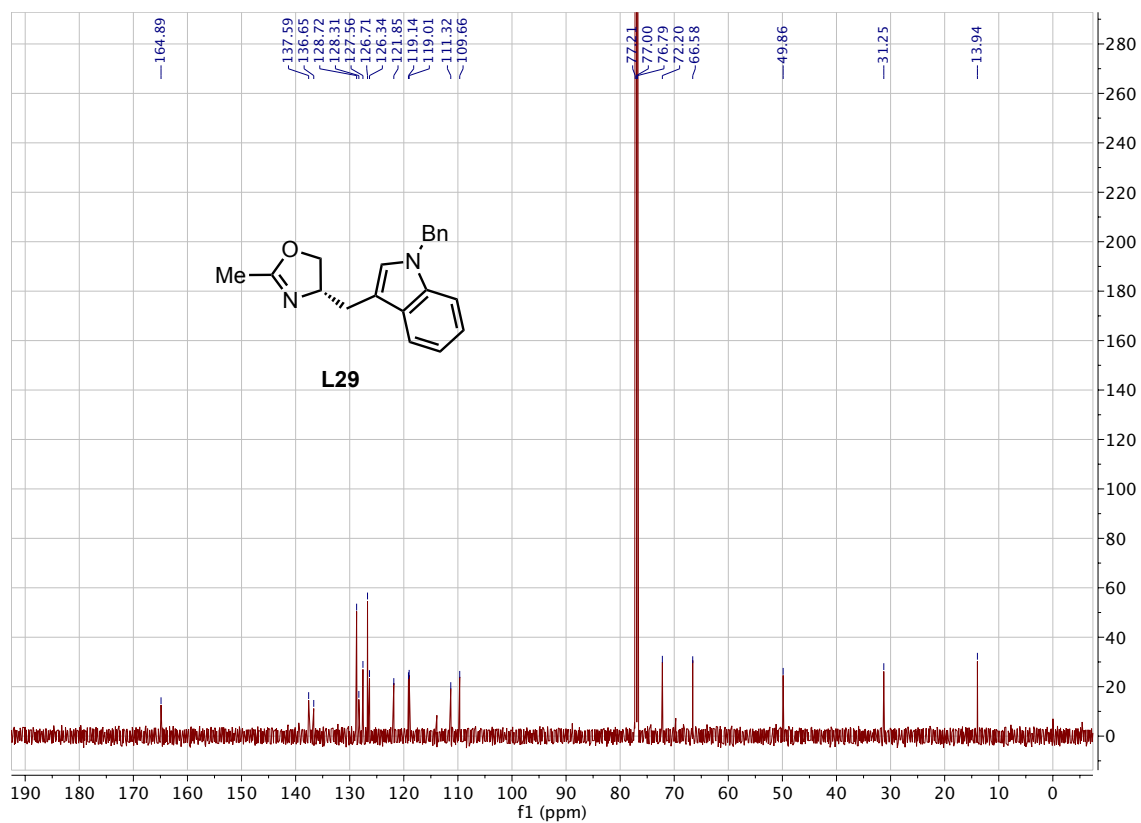

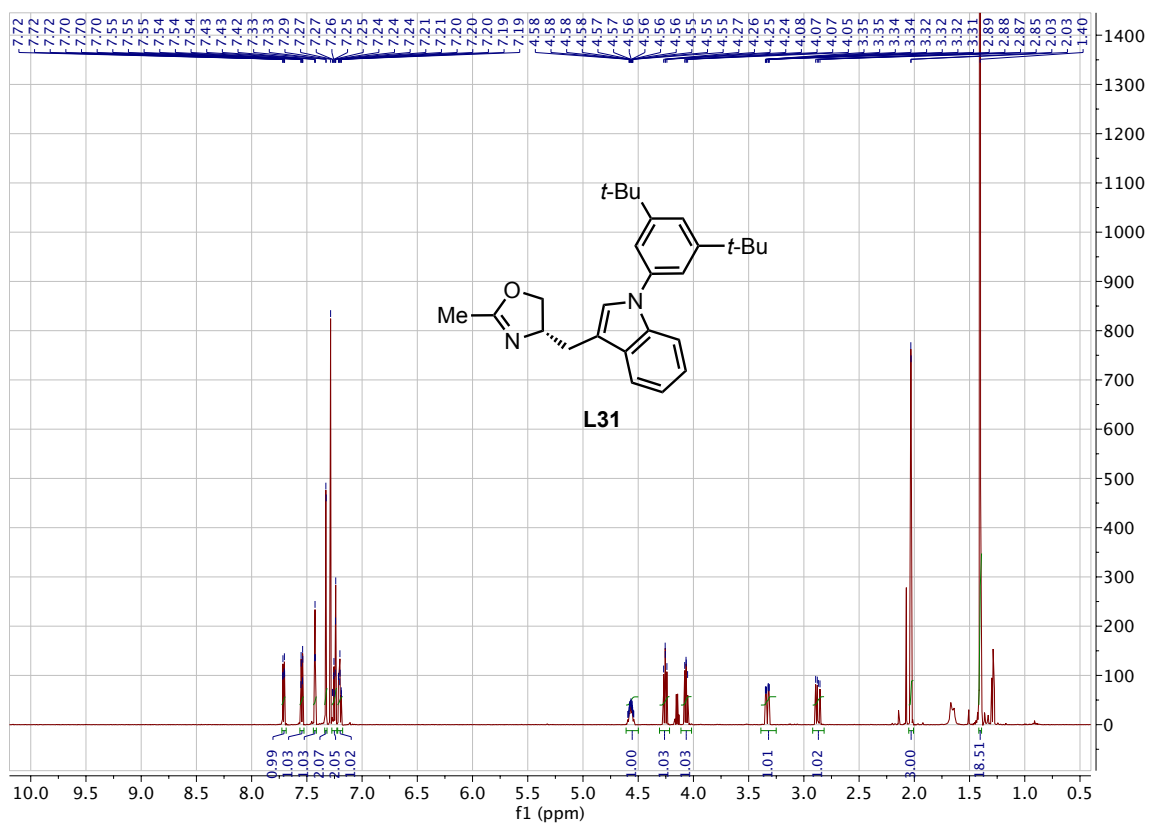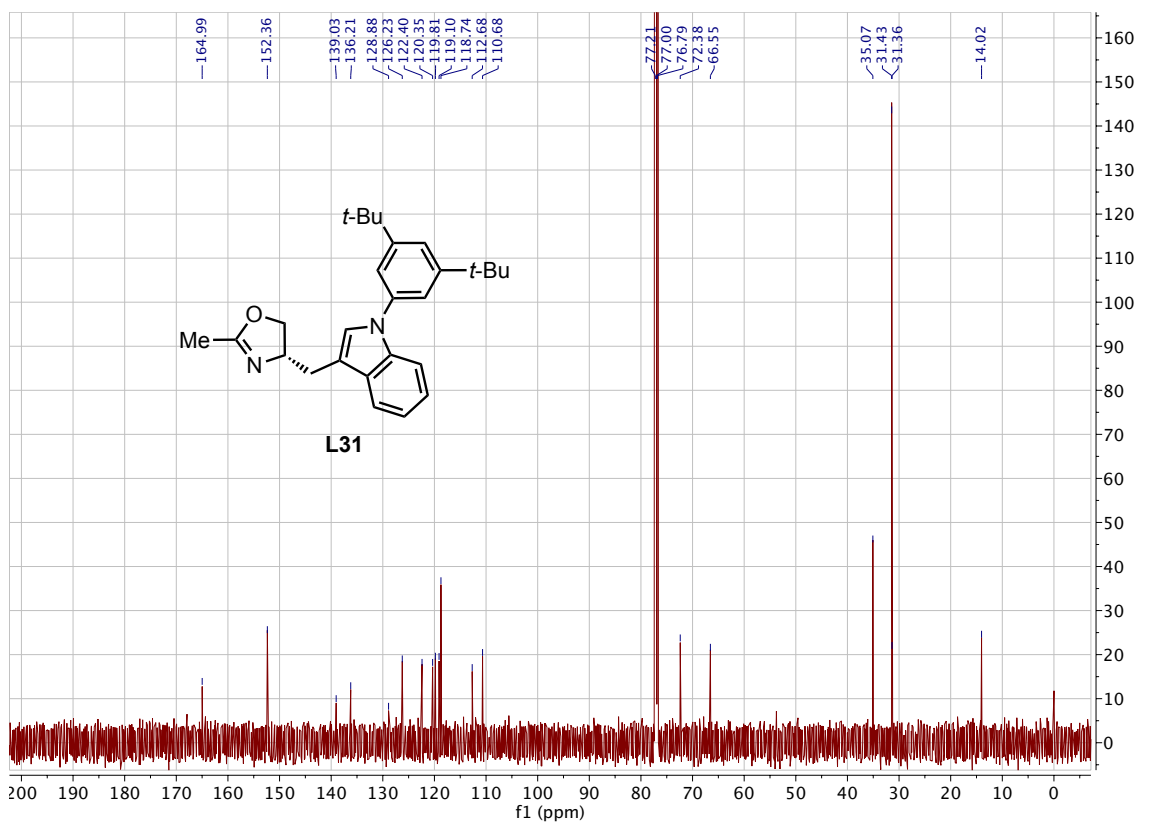

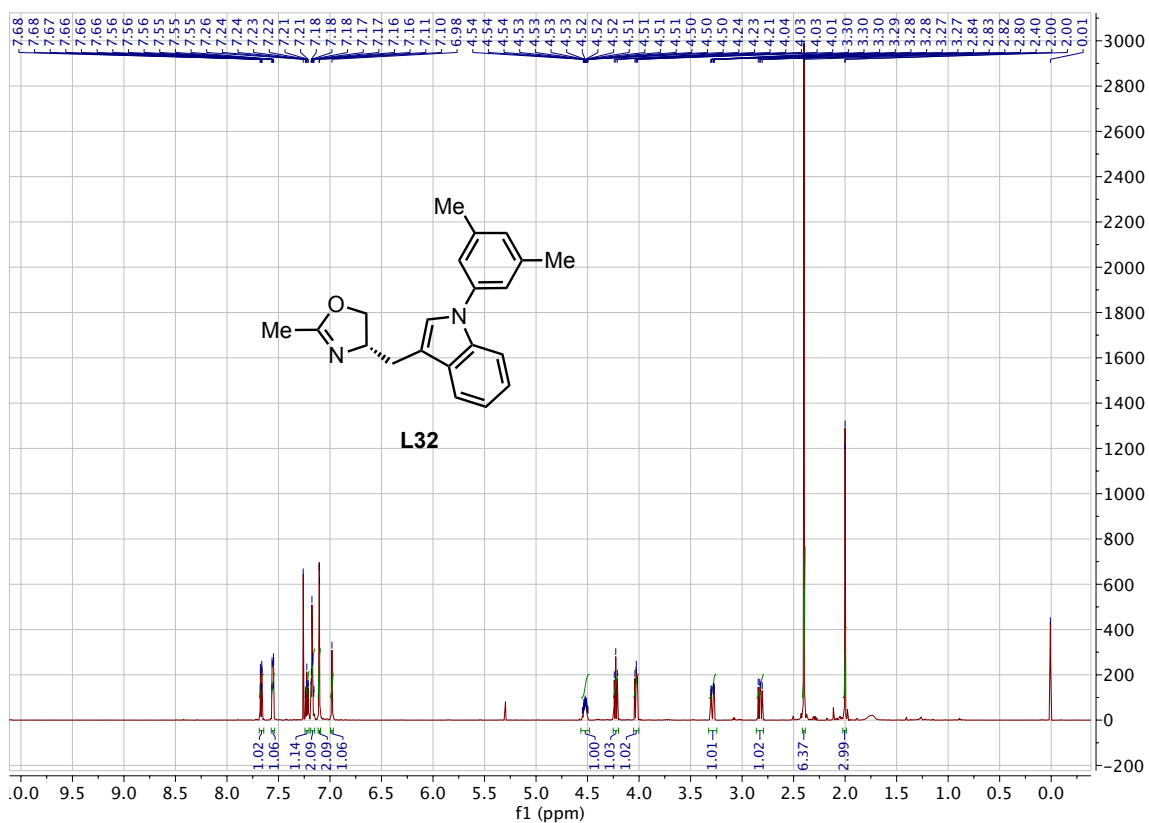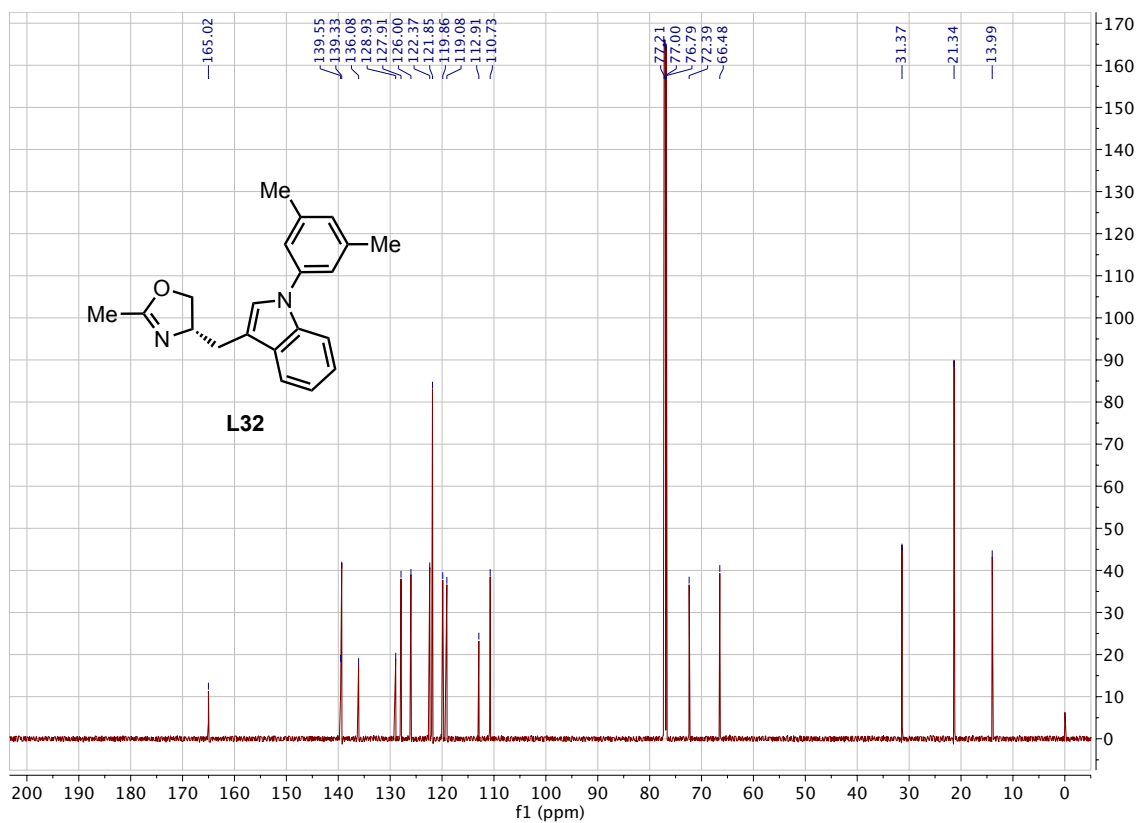

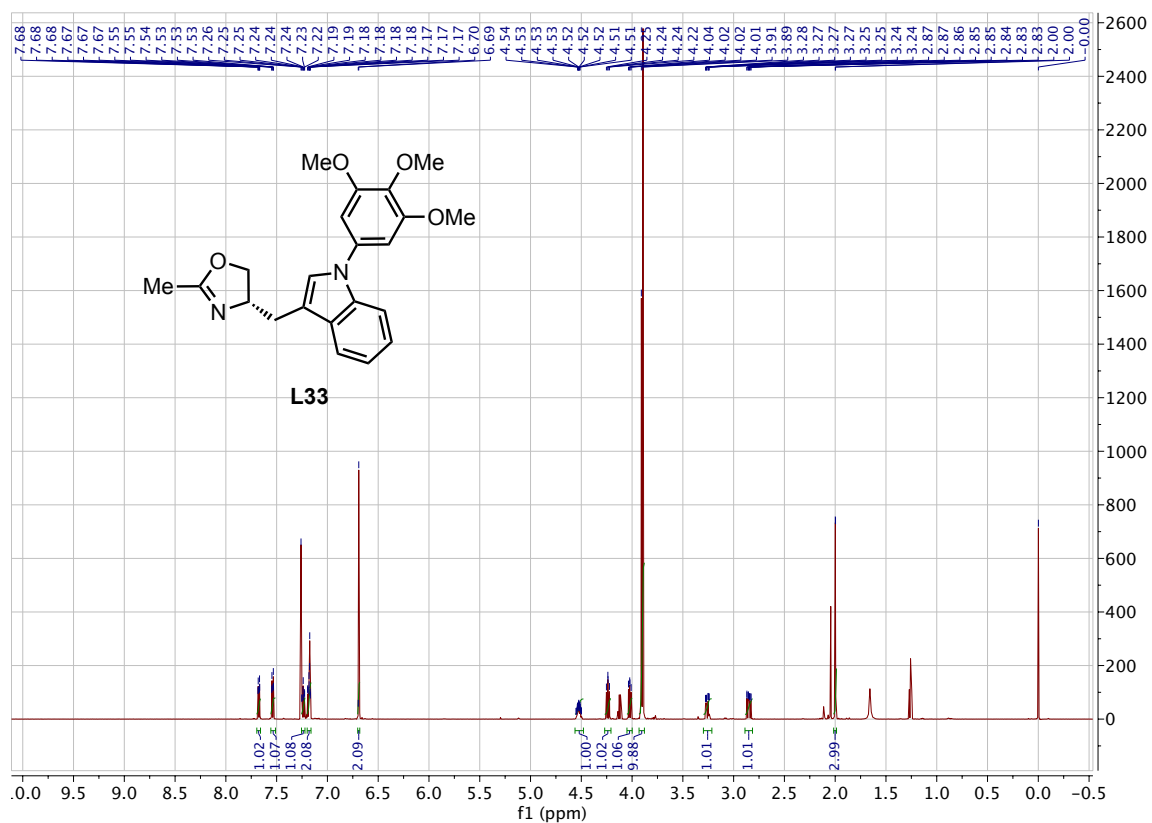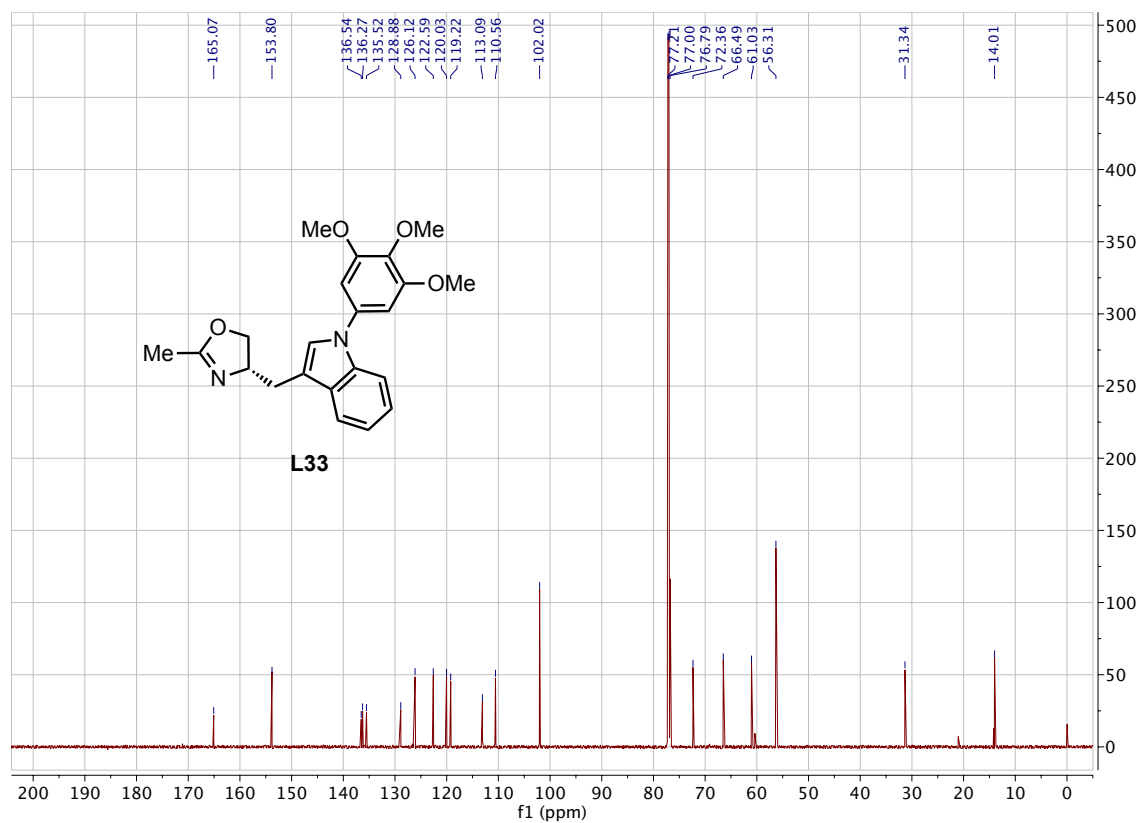



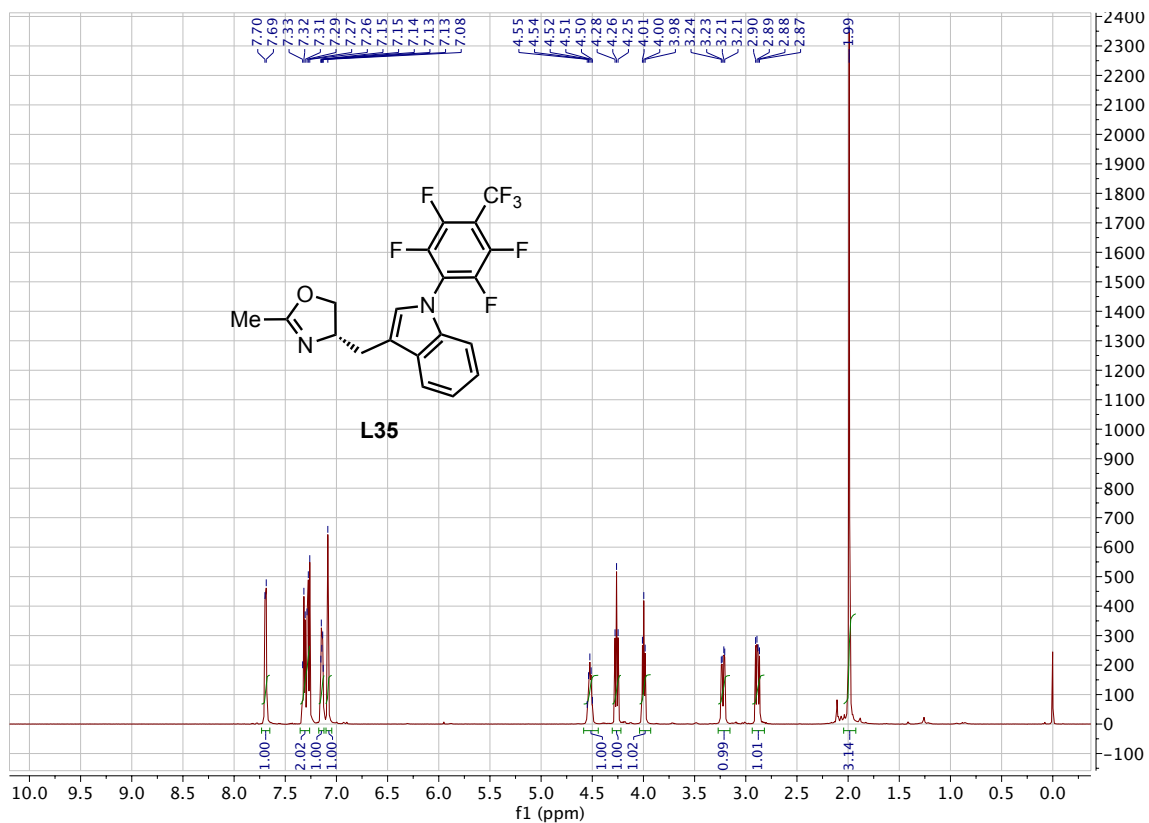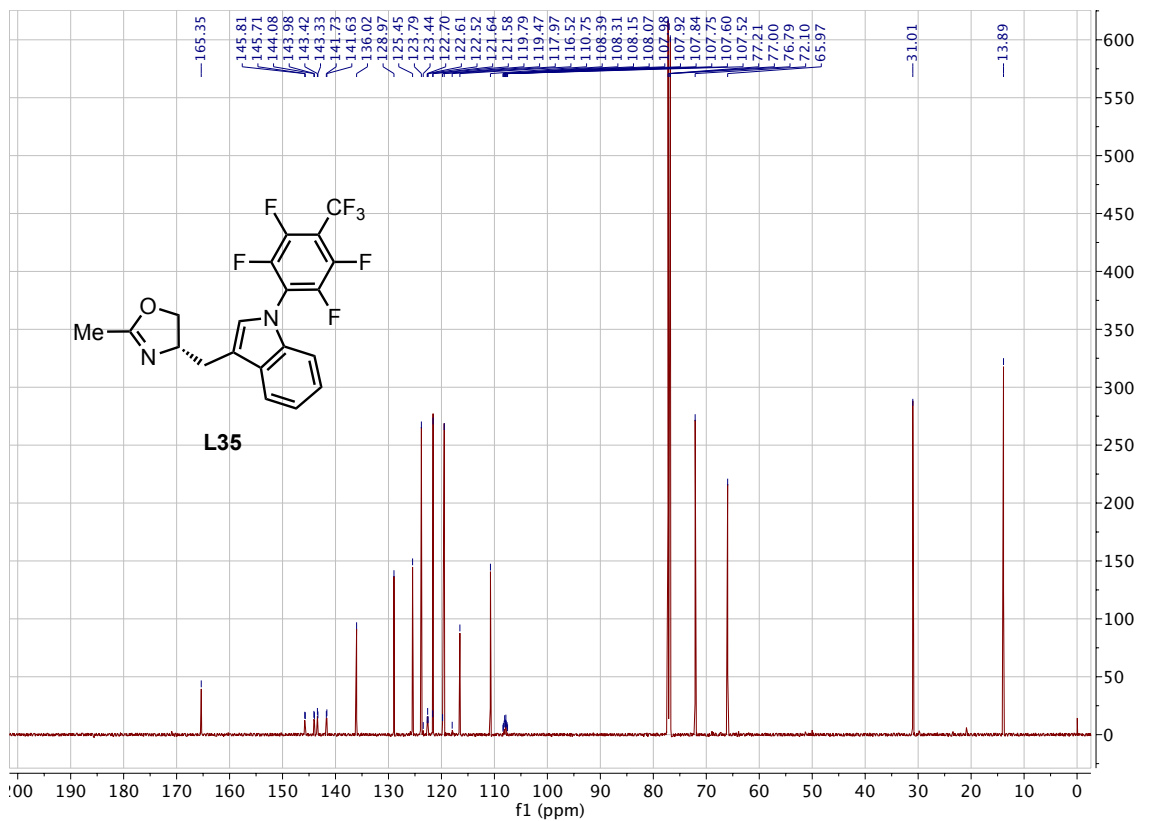

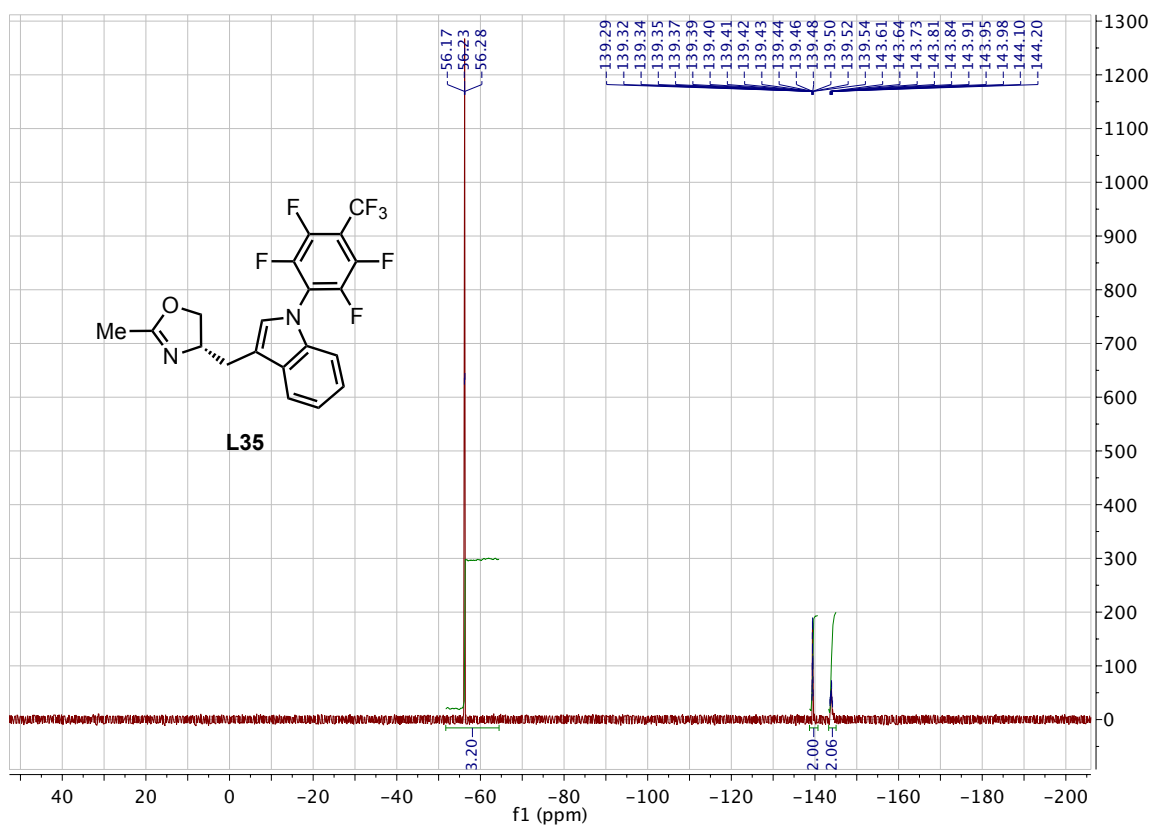

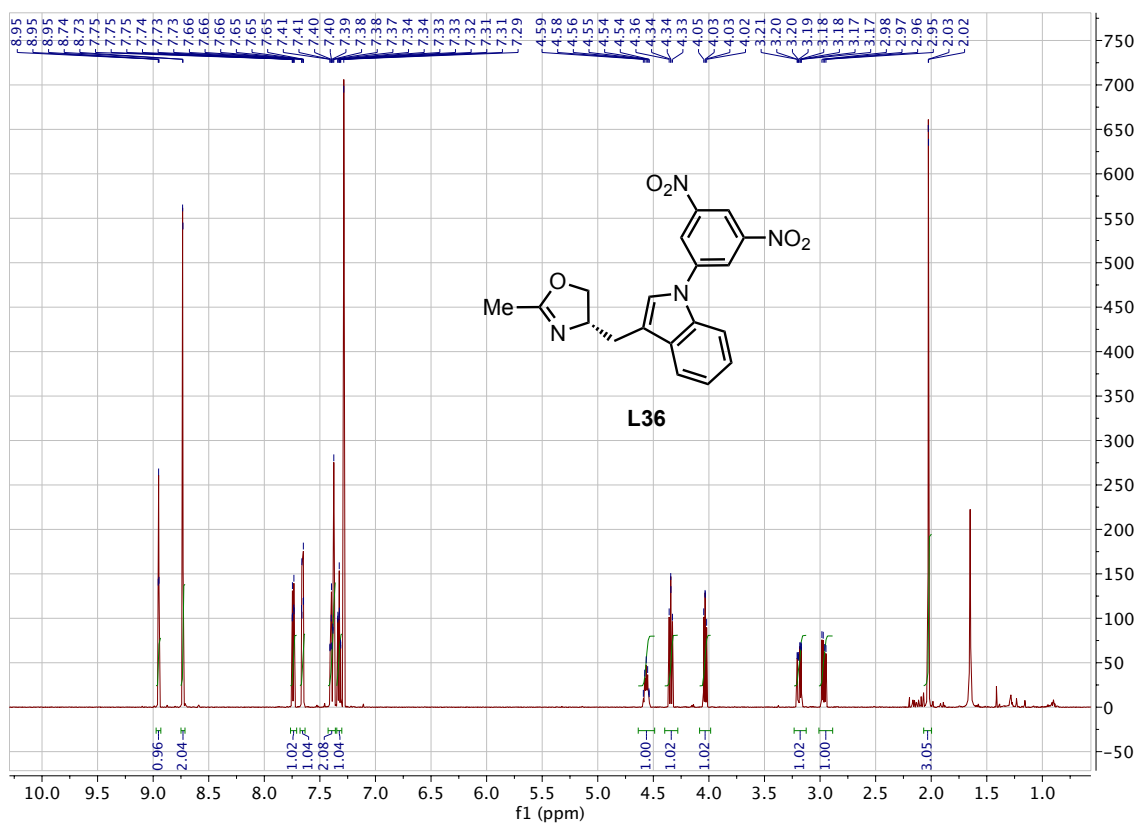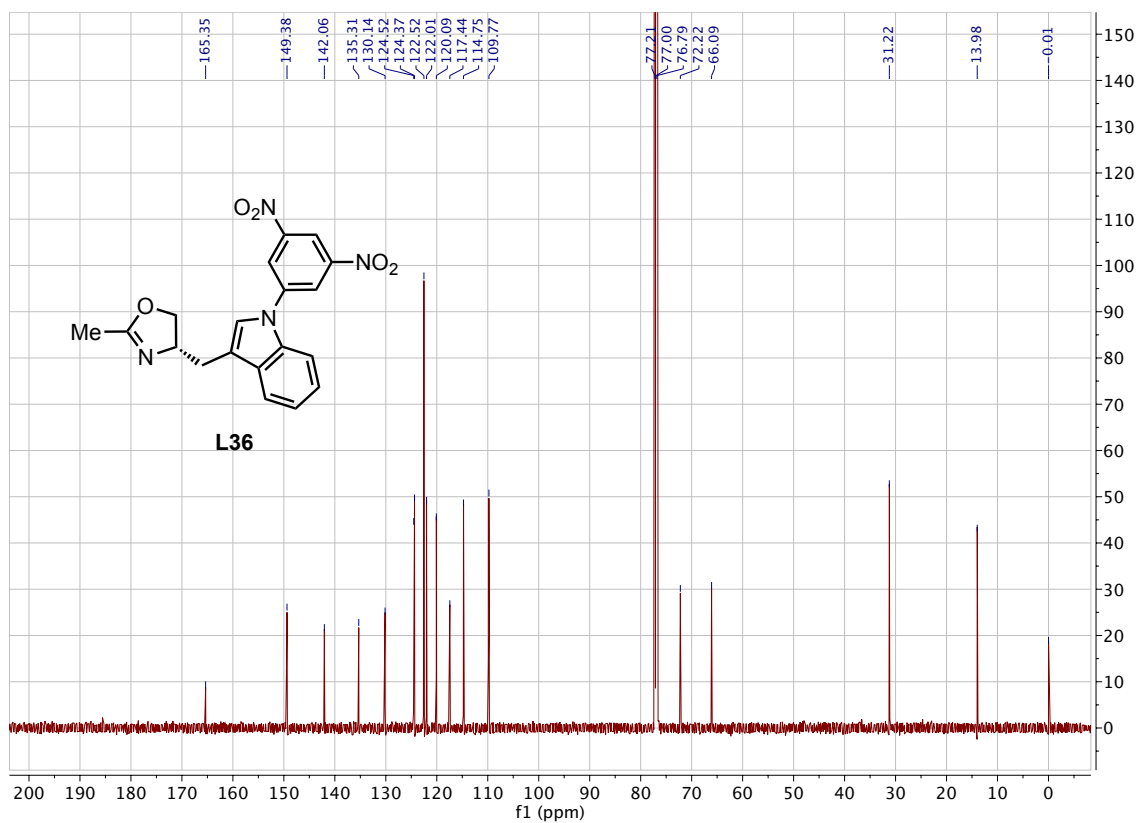

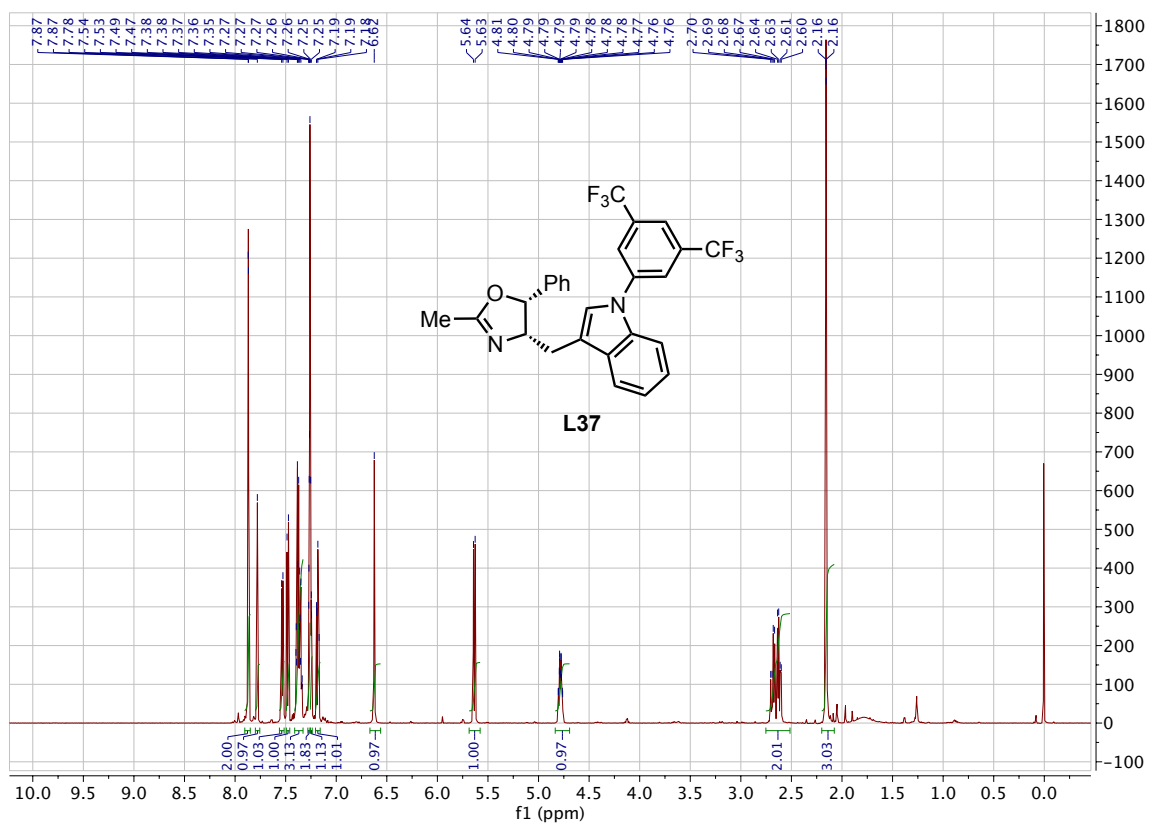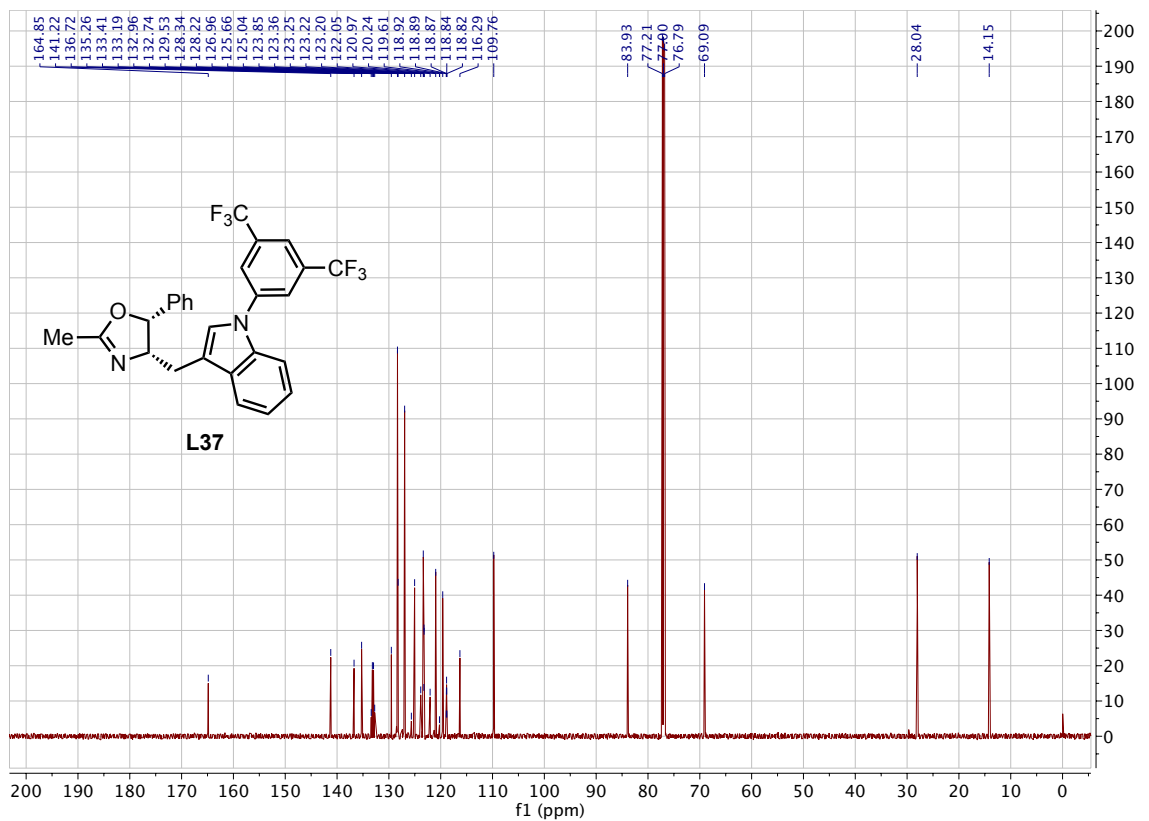

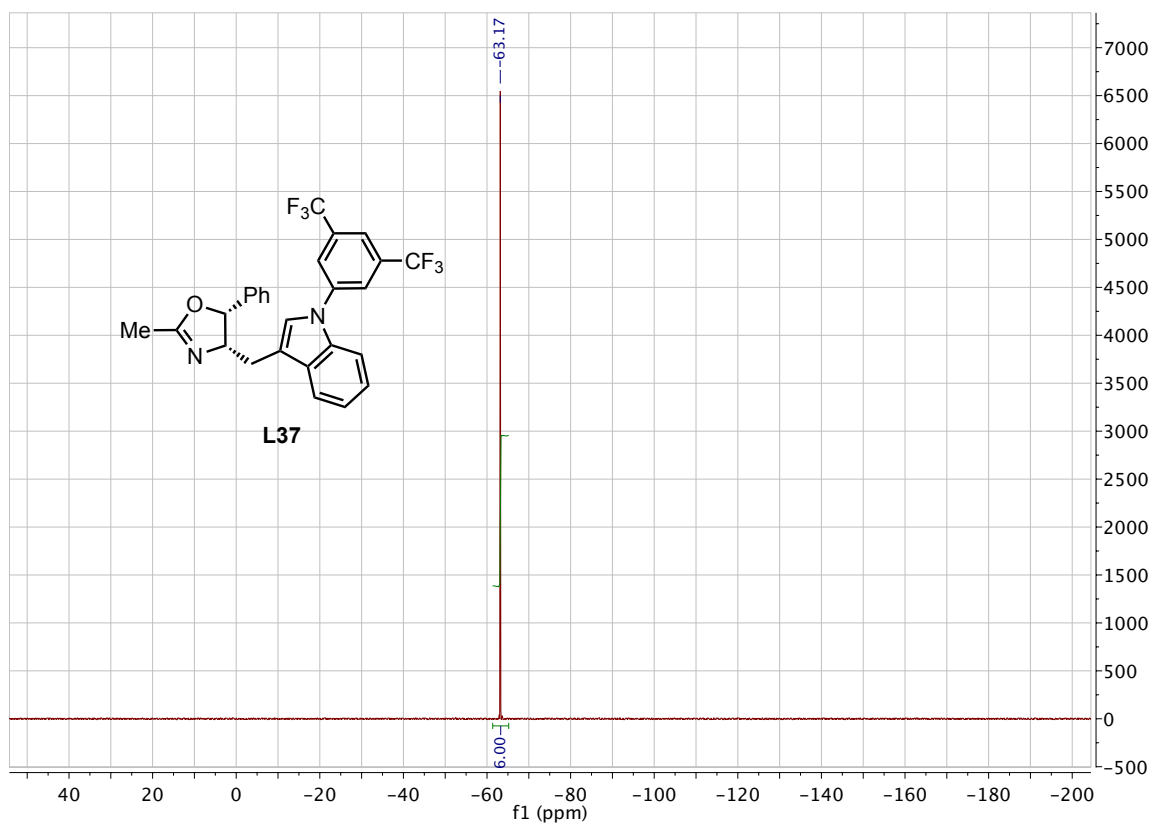

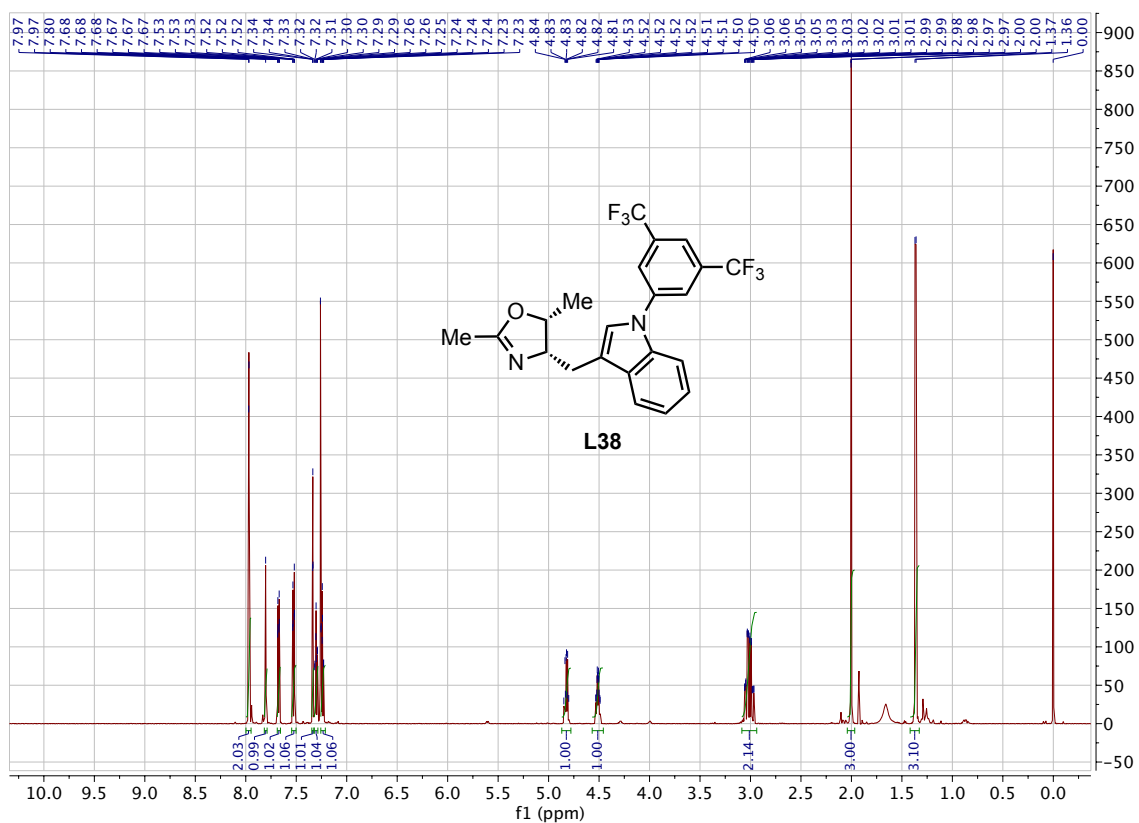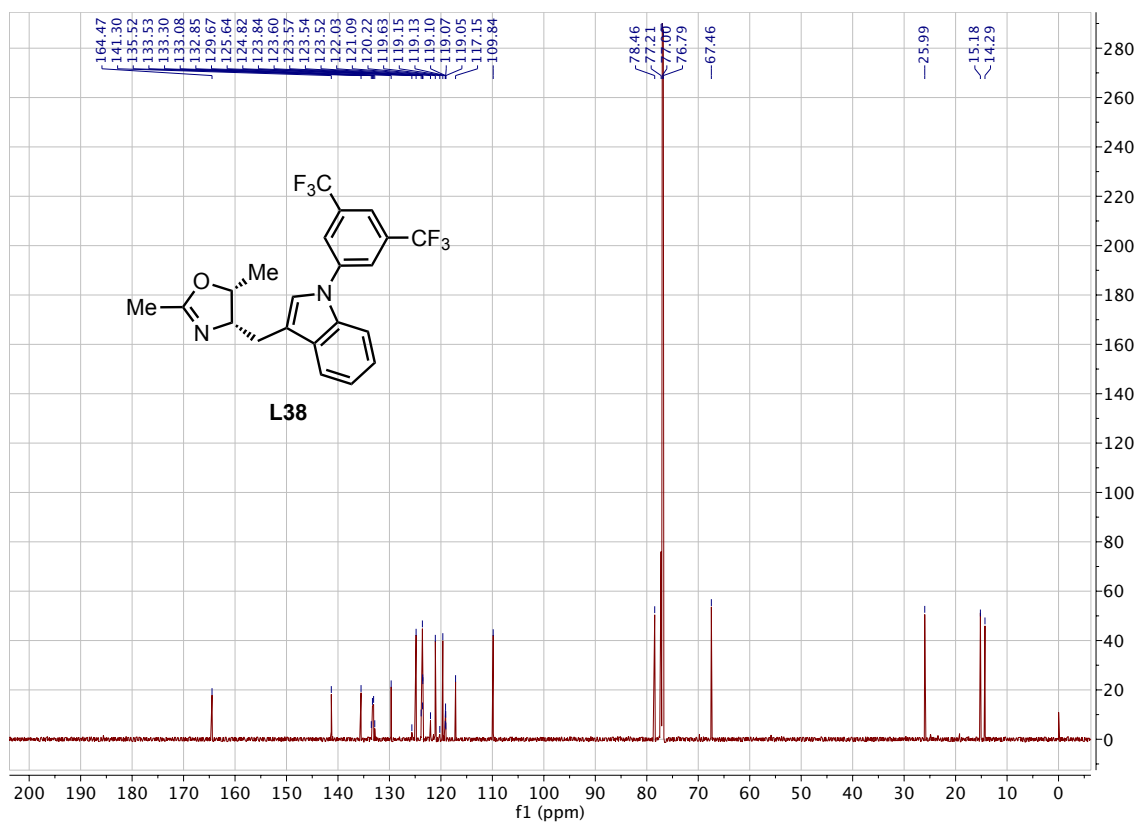

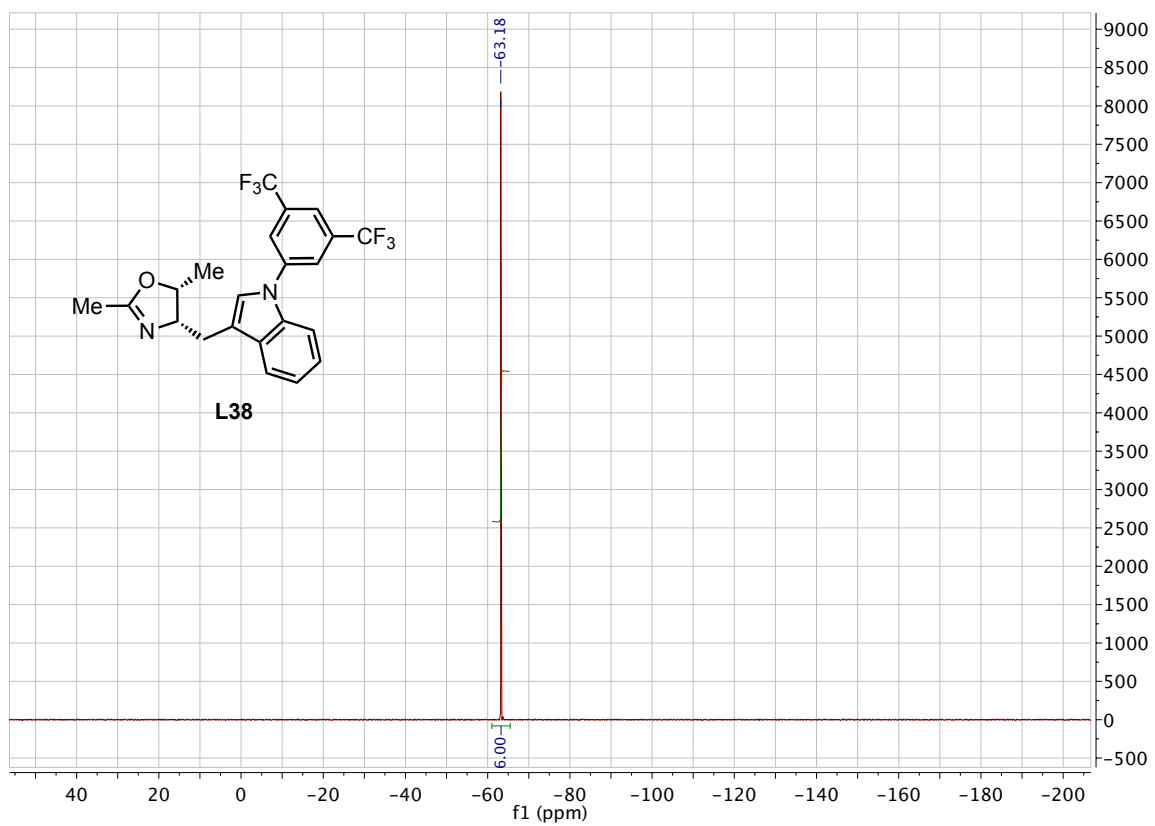

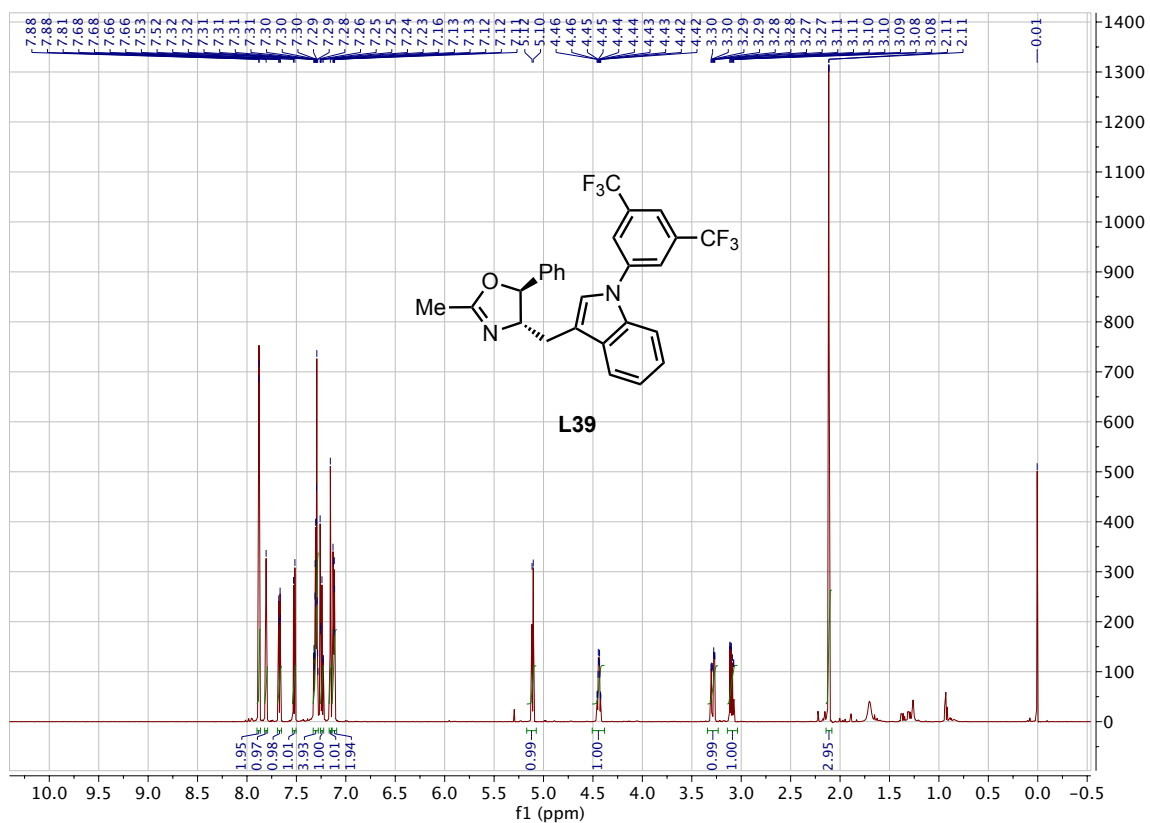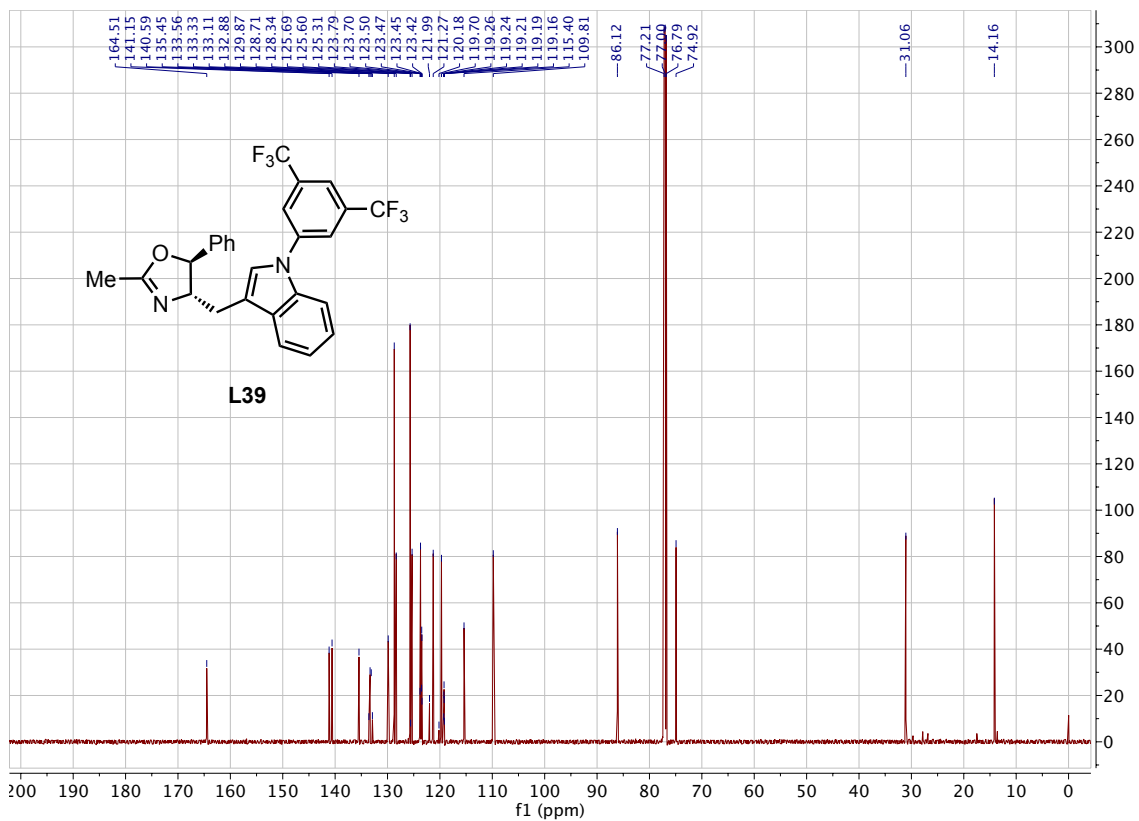



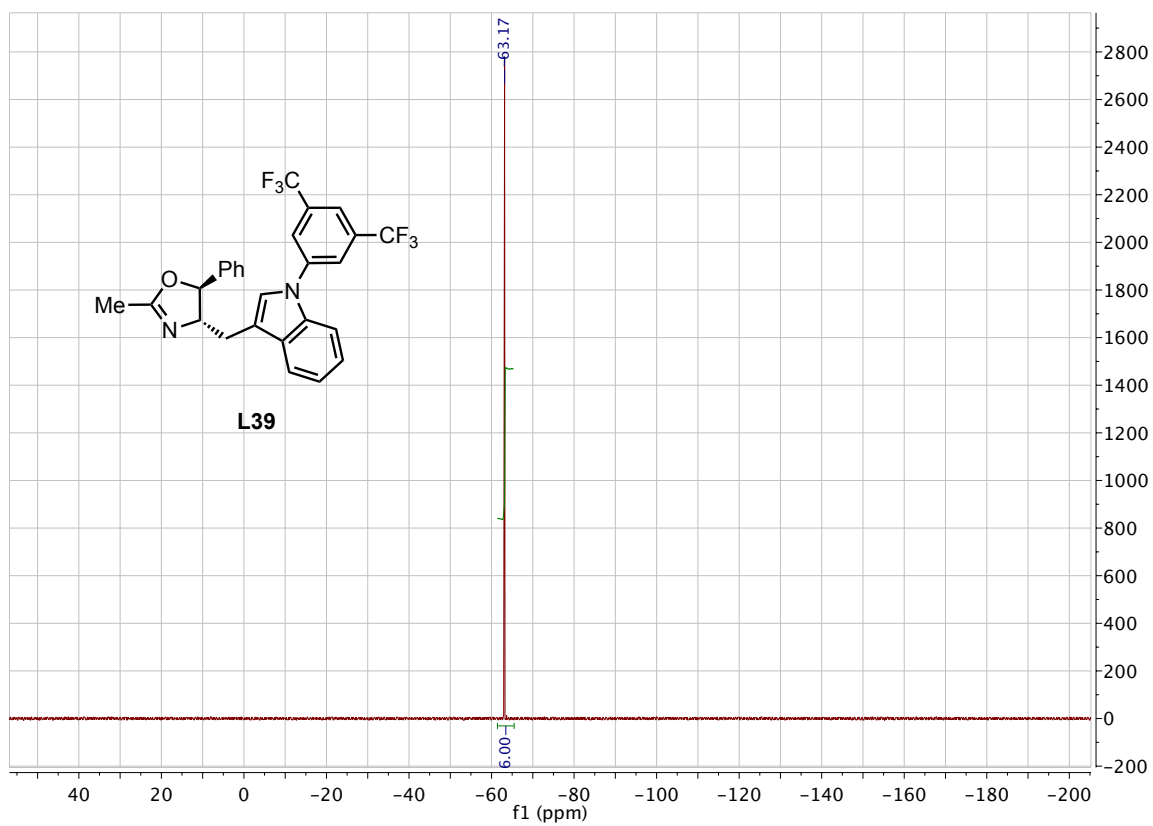

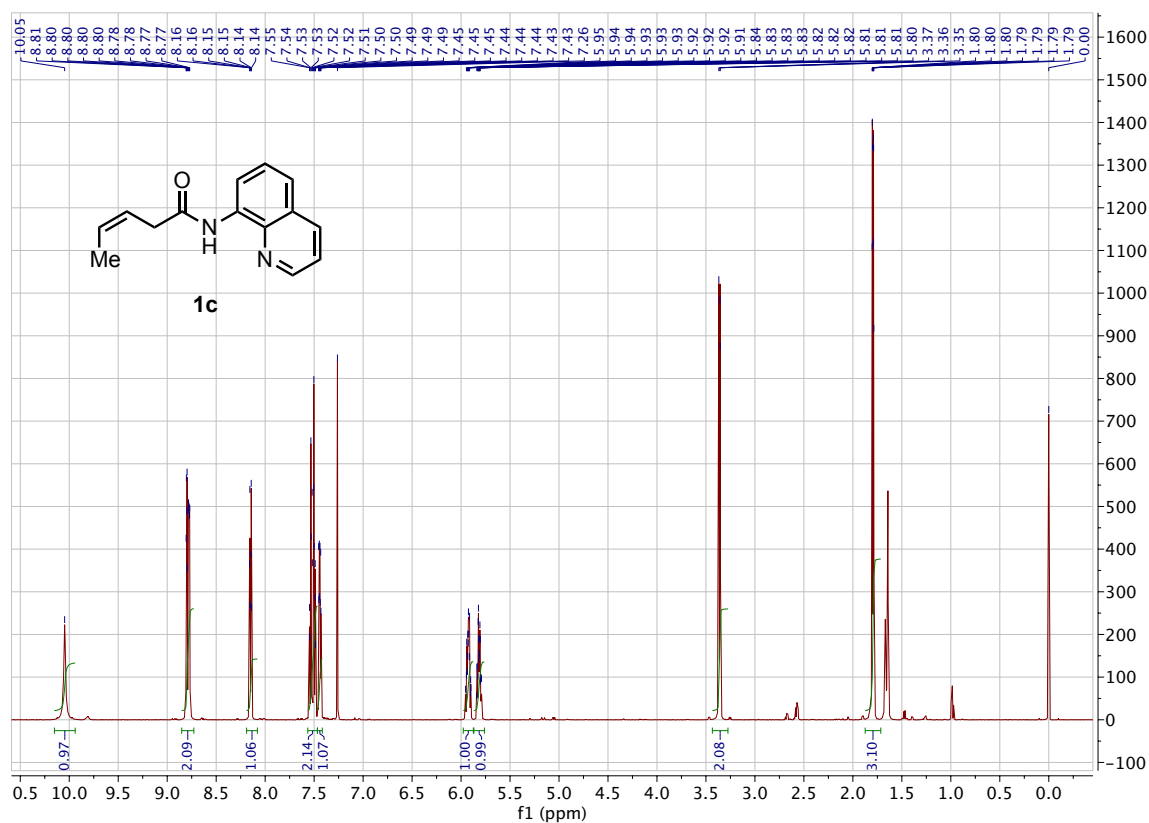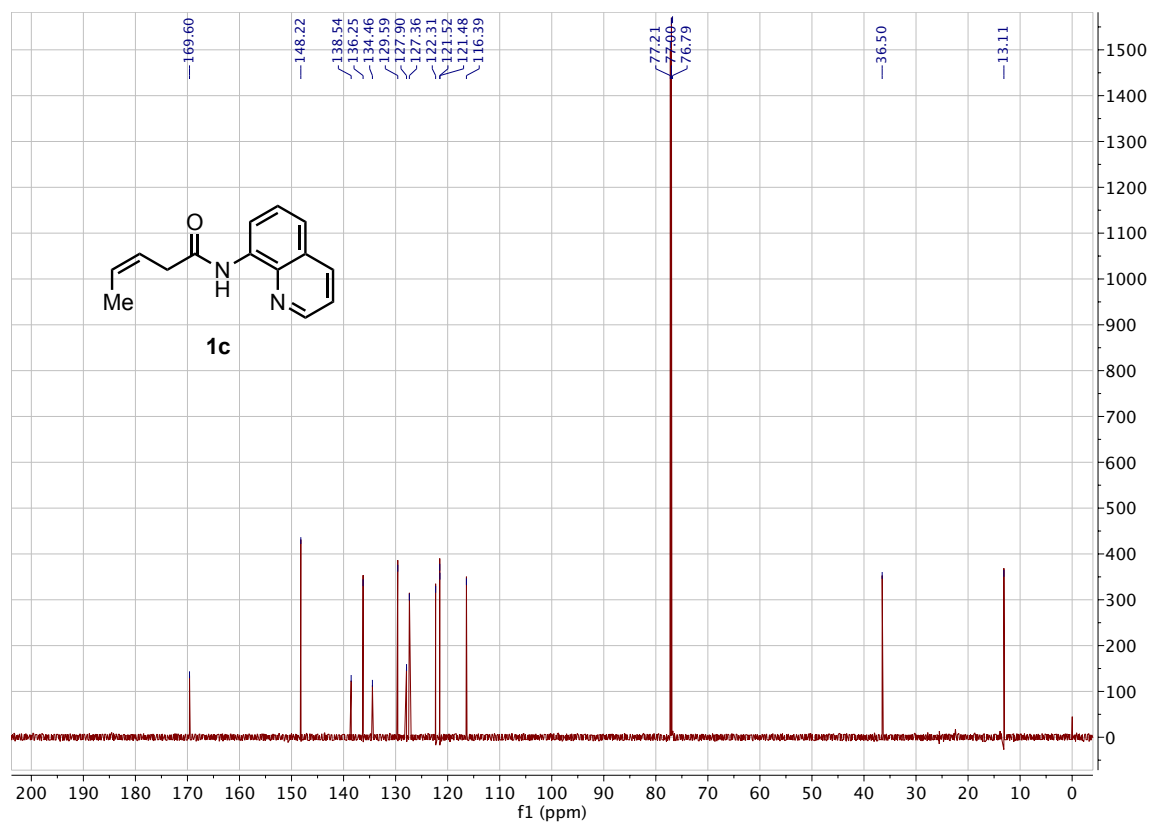

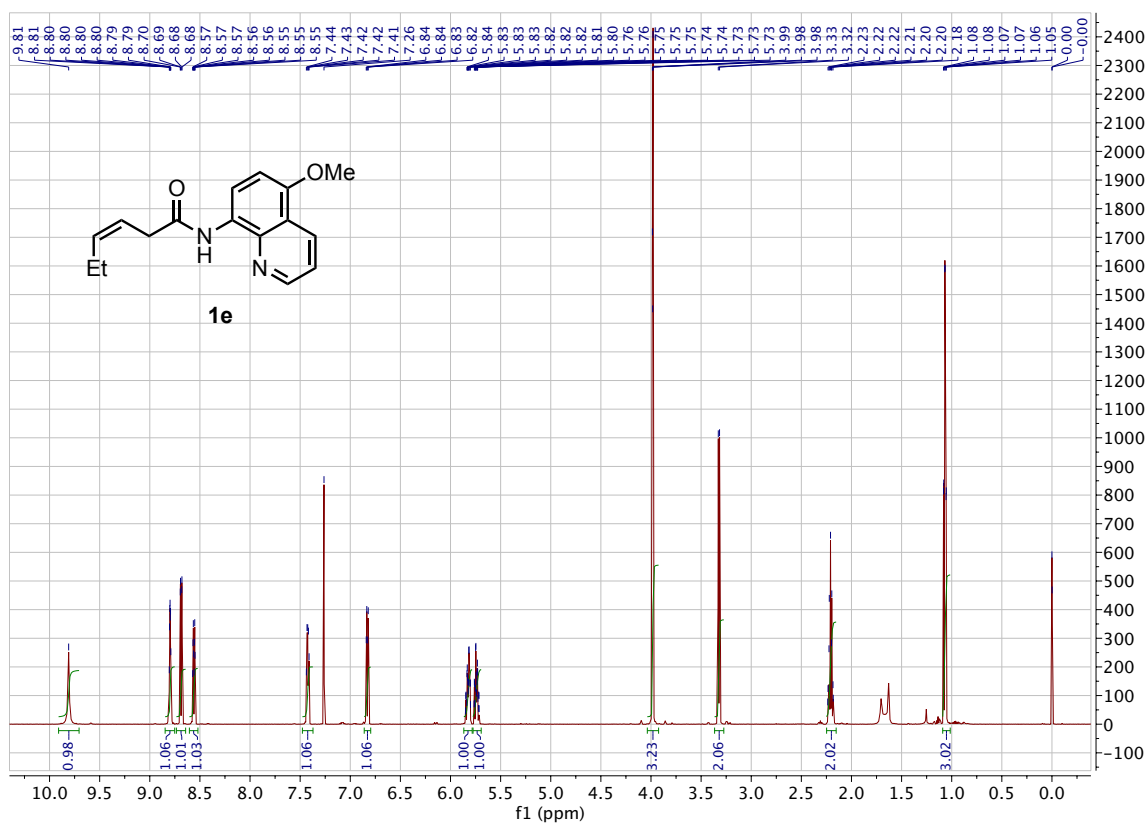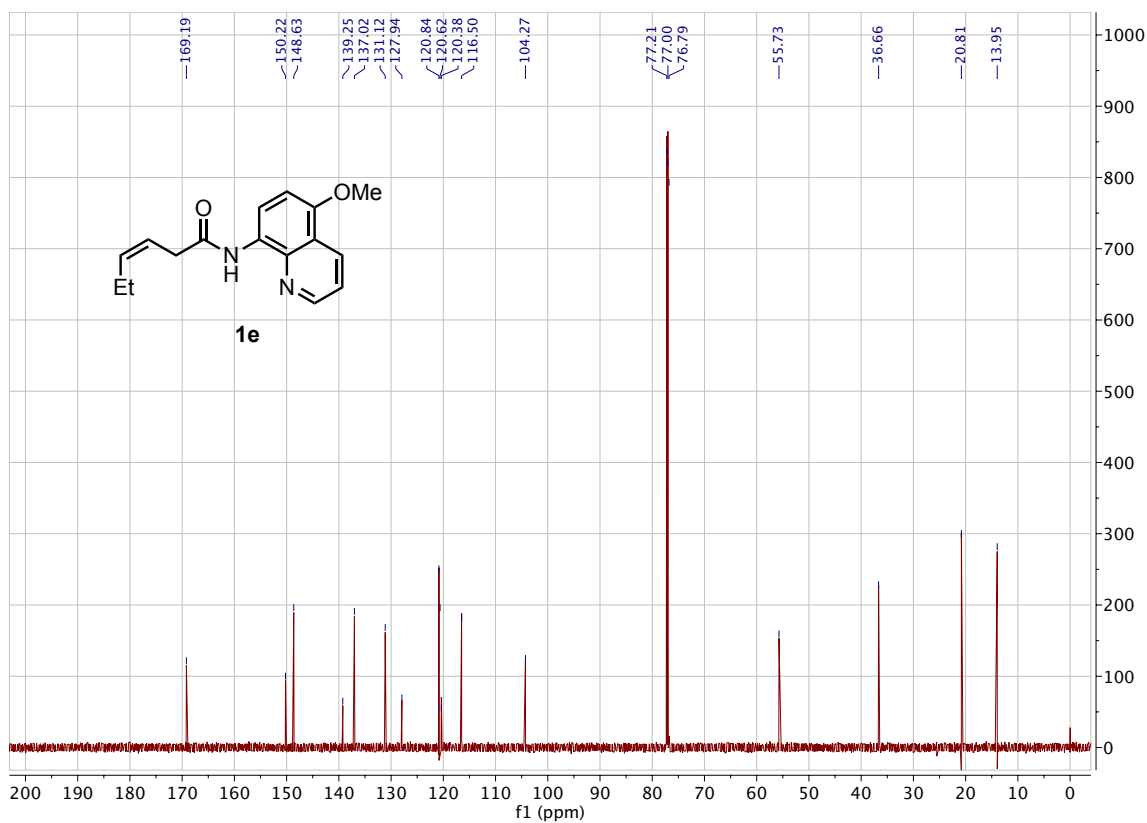

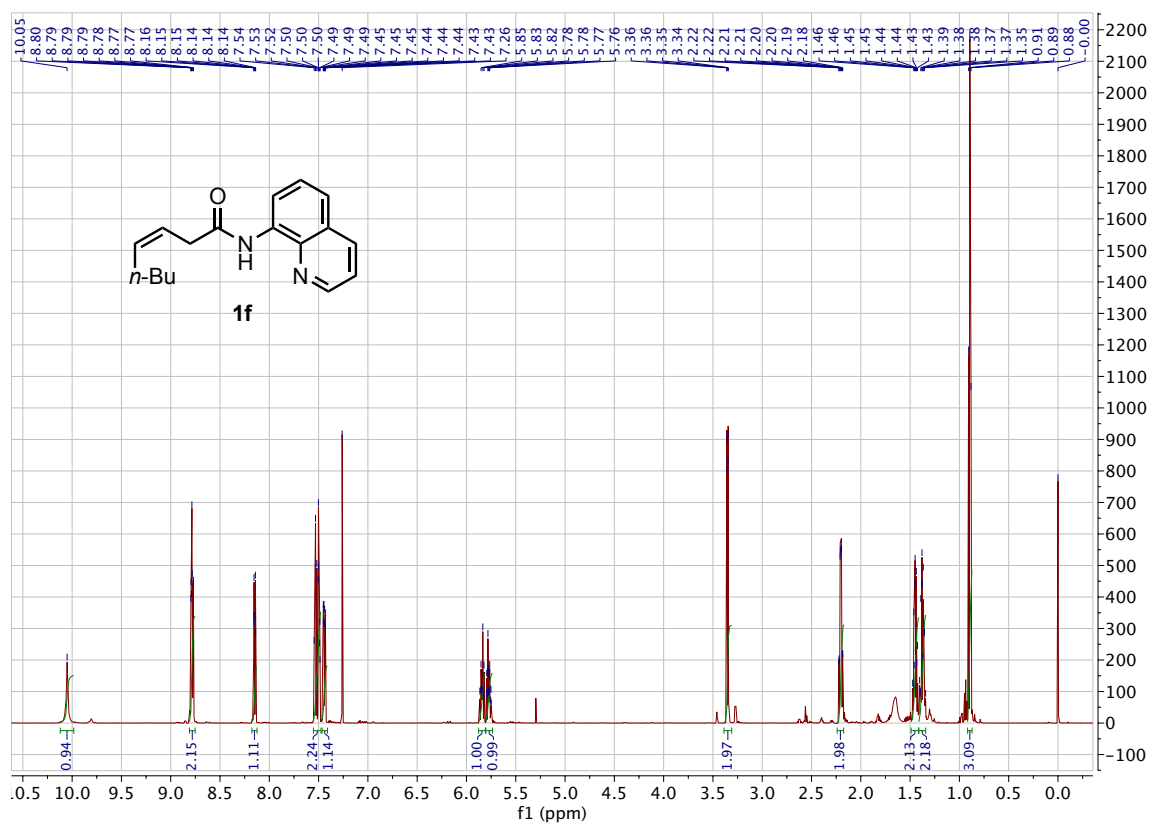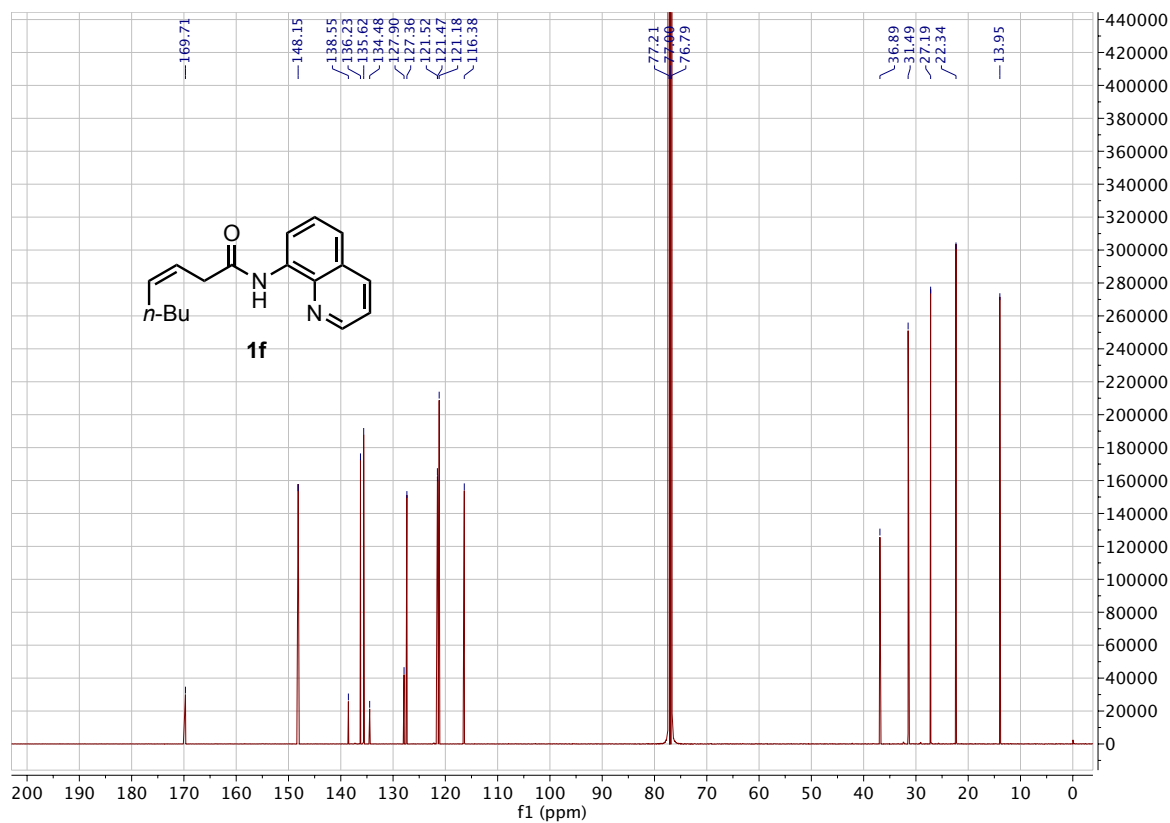

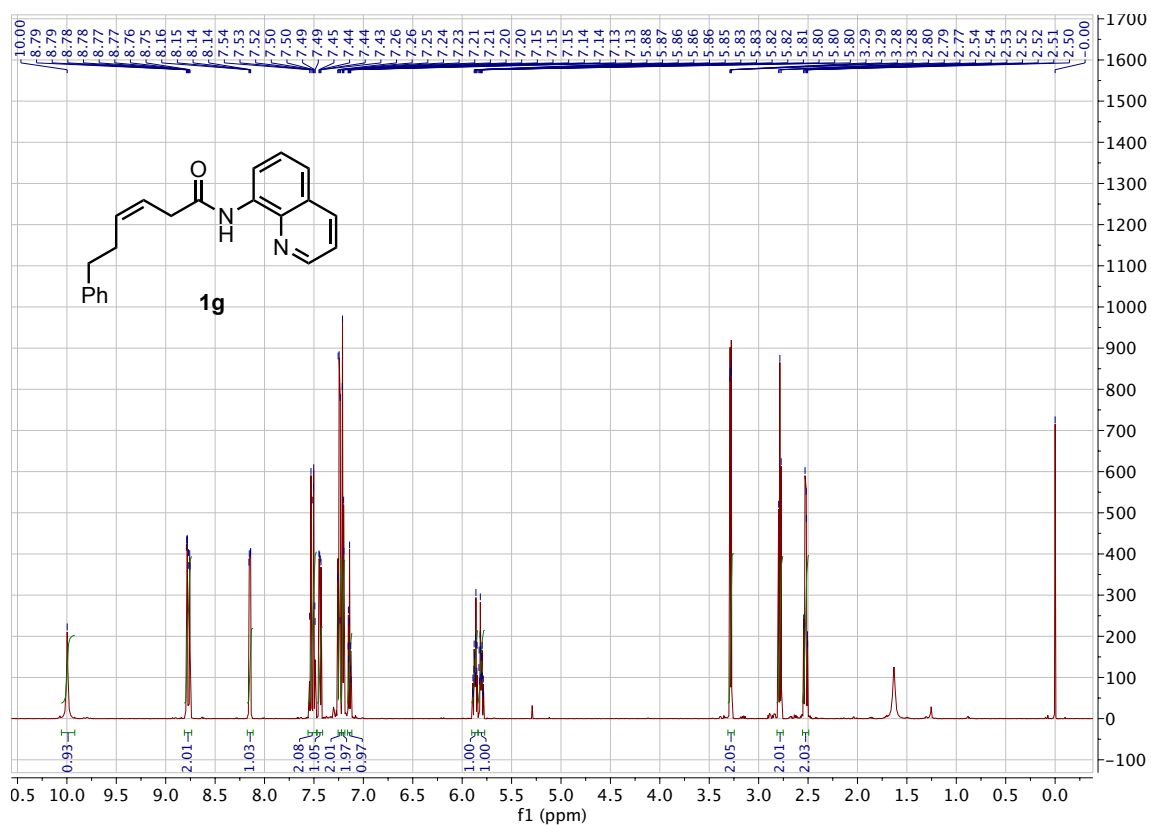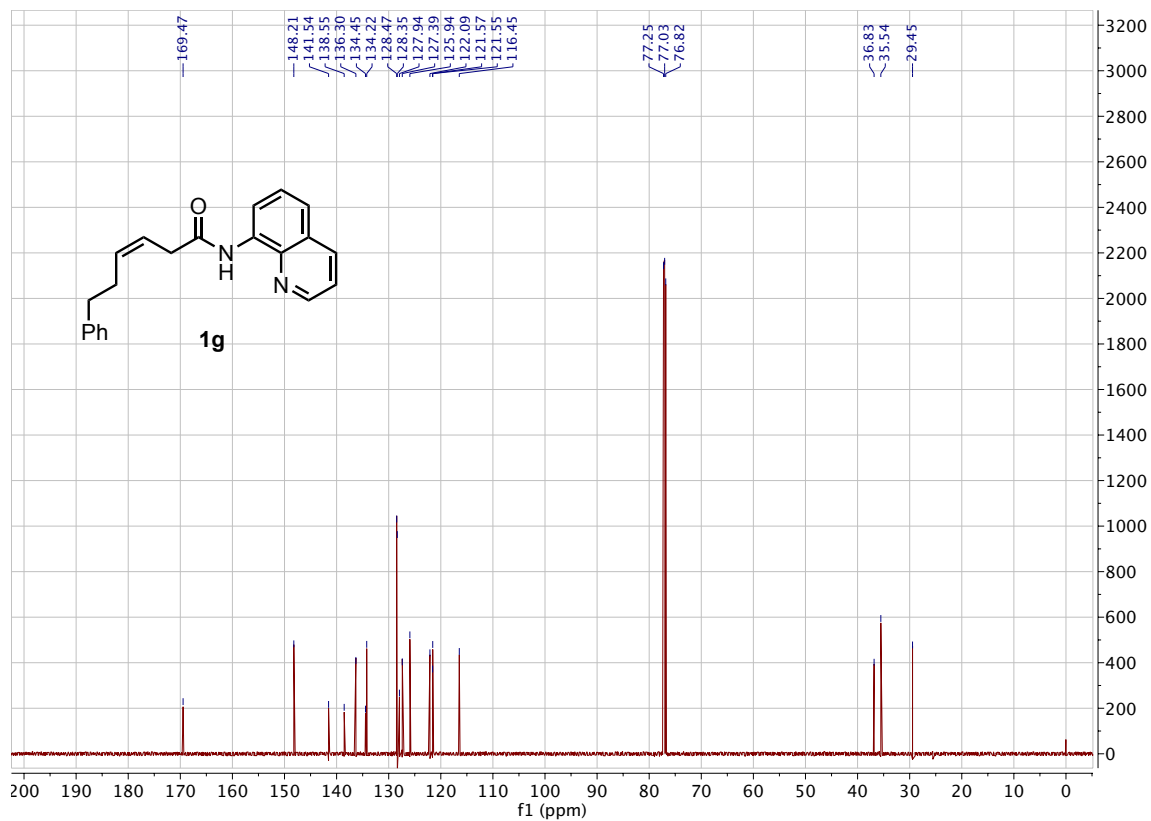

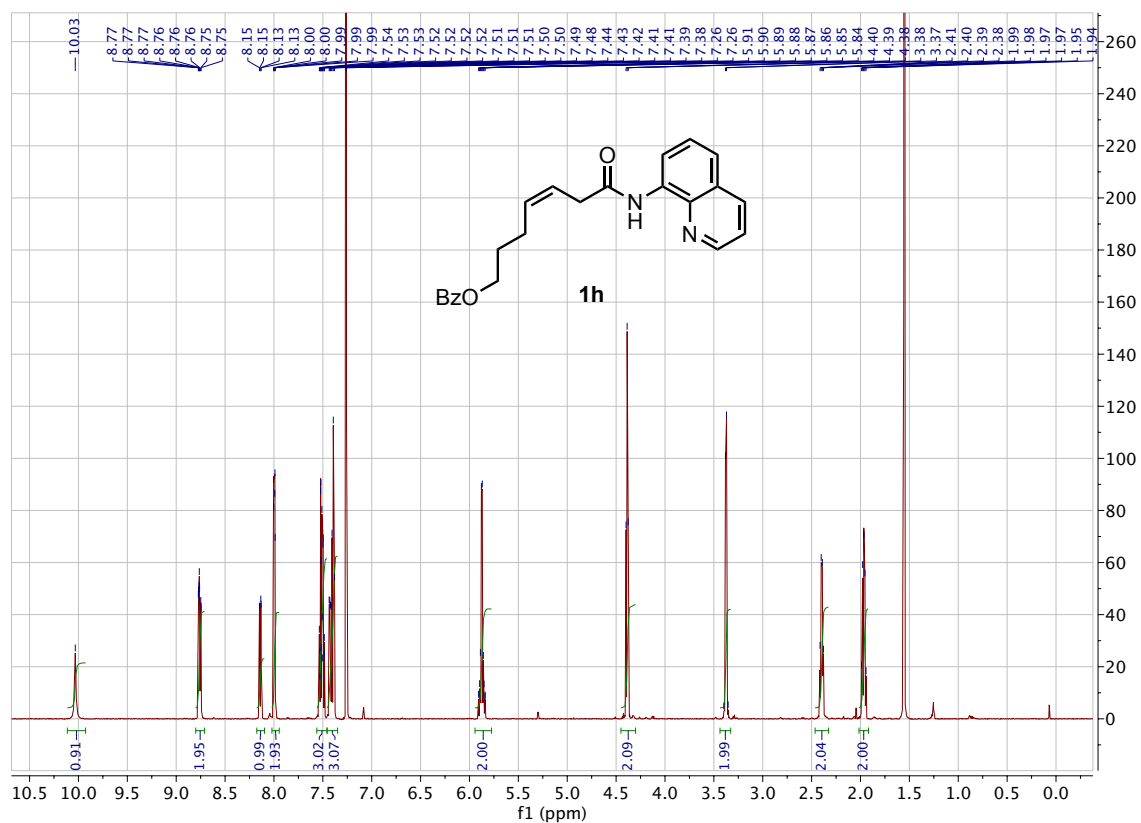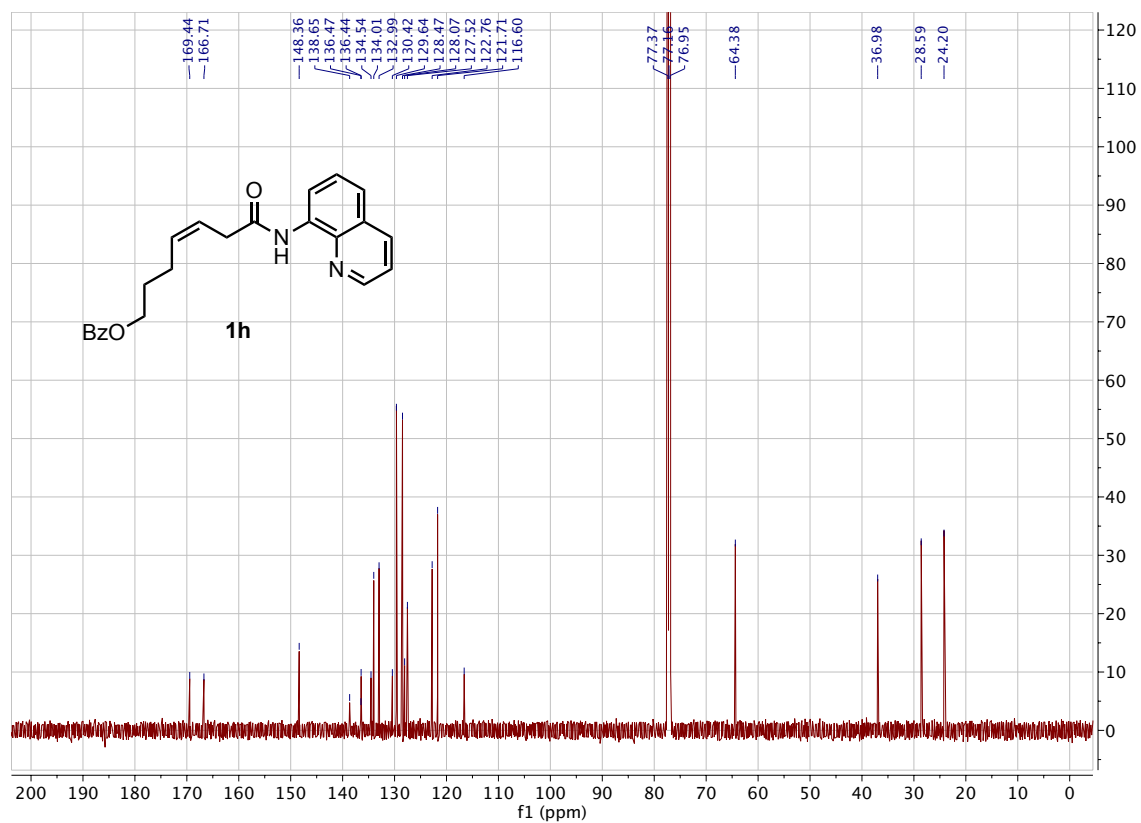

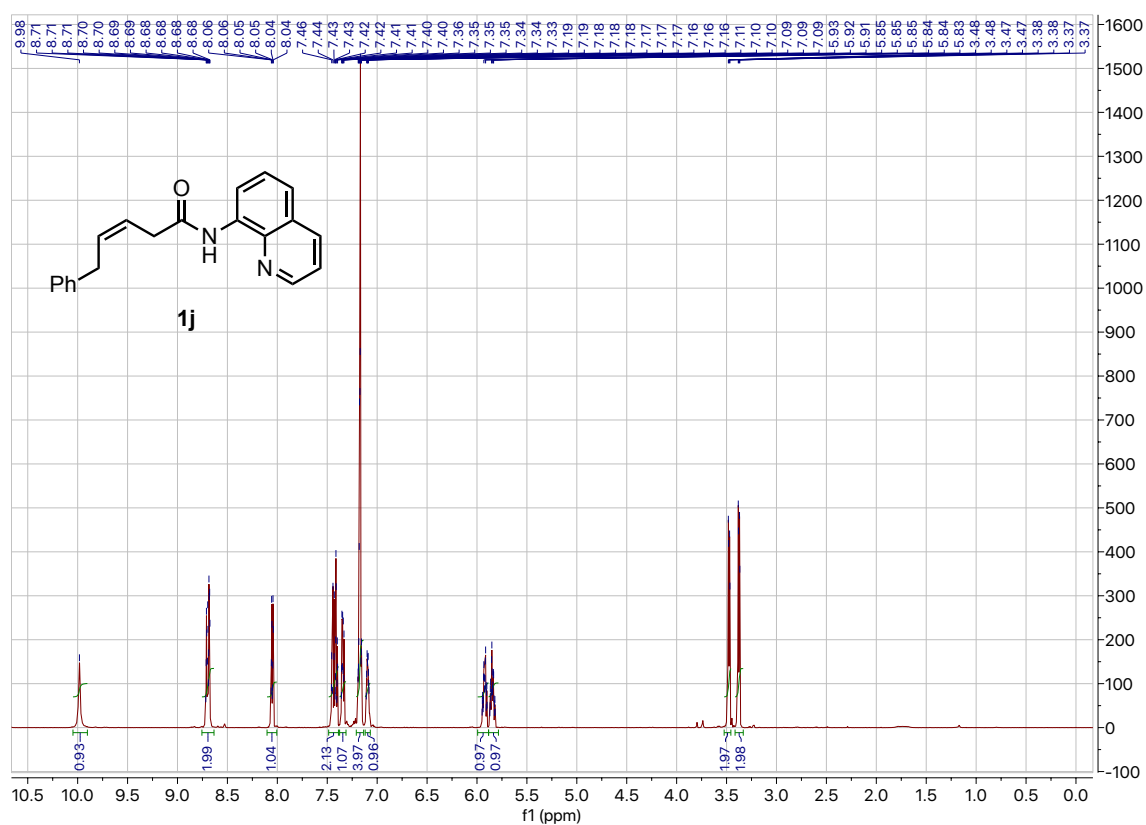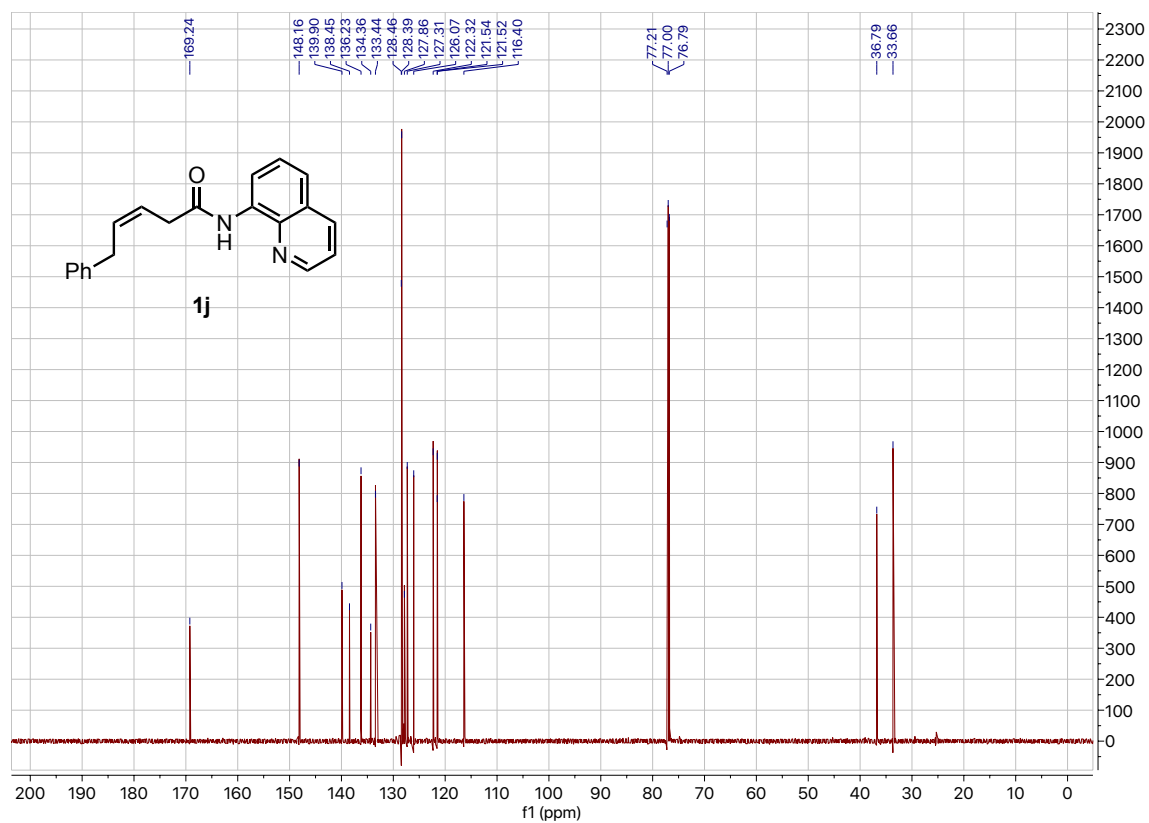

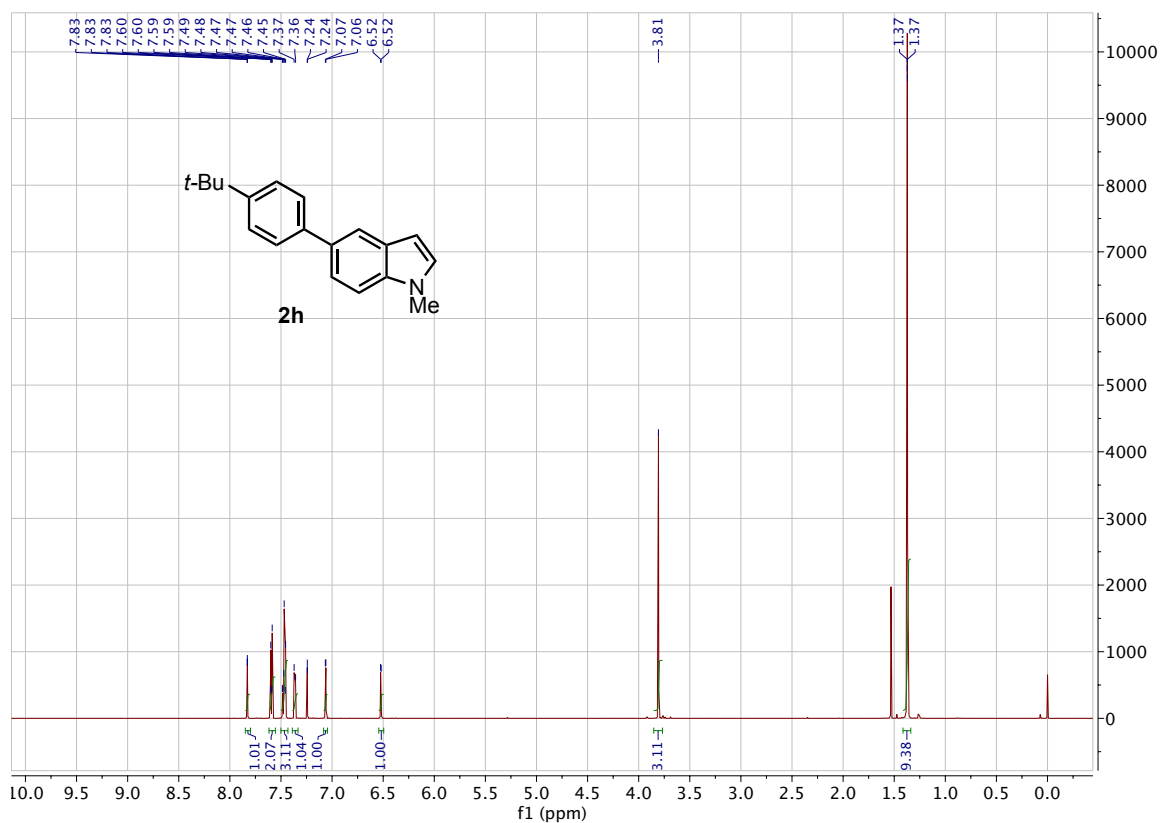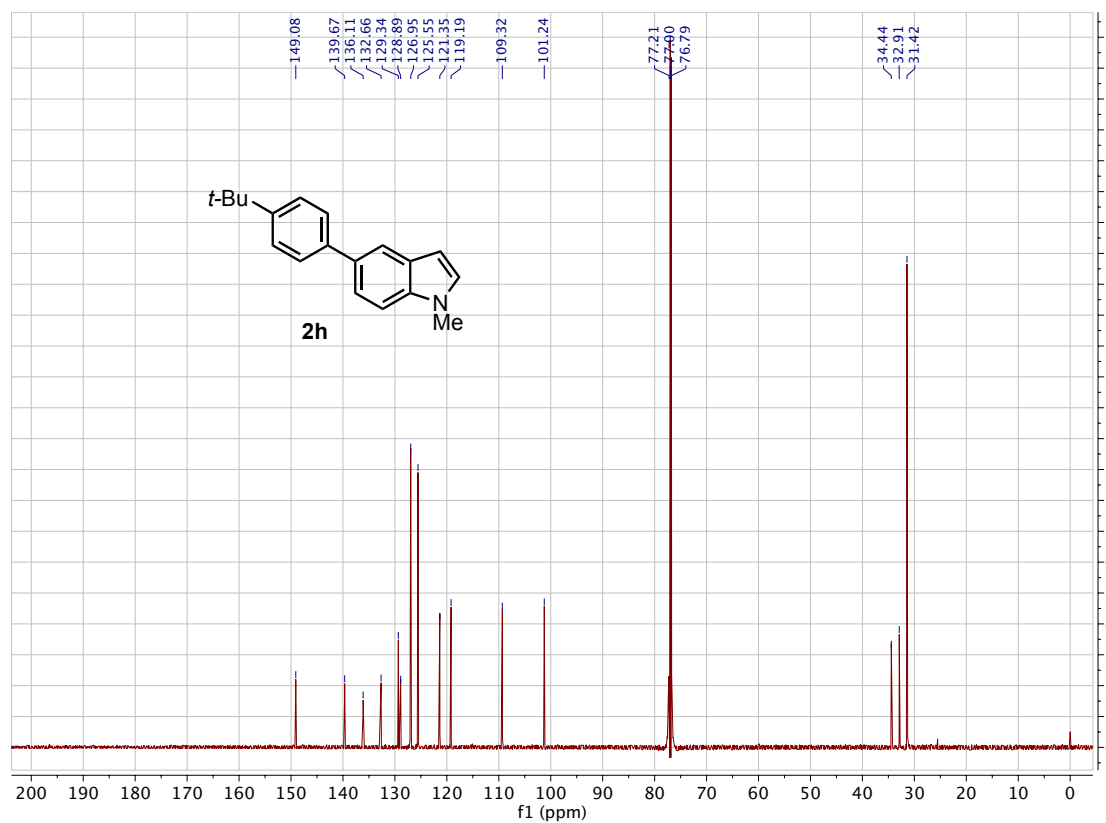



SFC Chromatograms of 4a

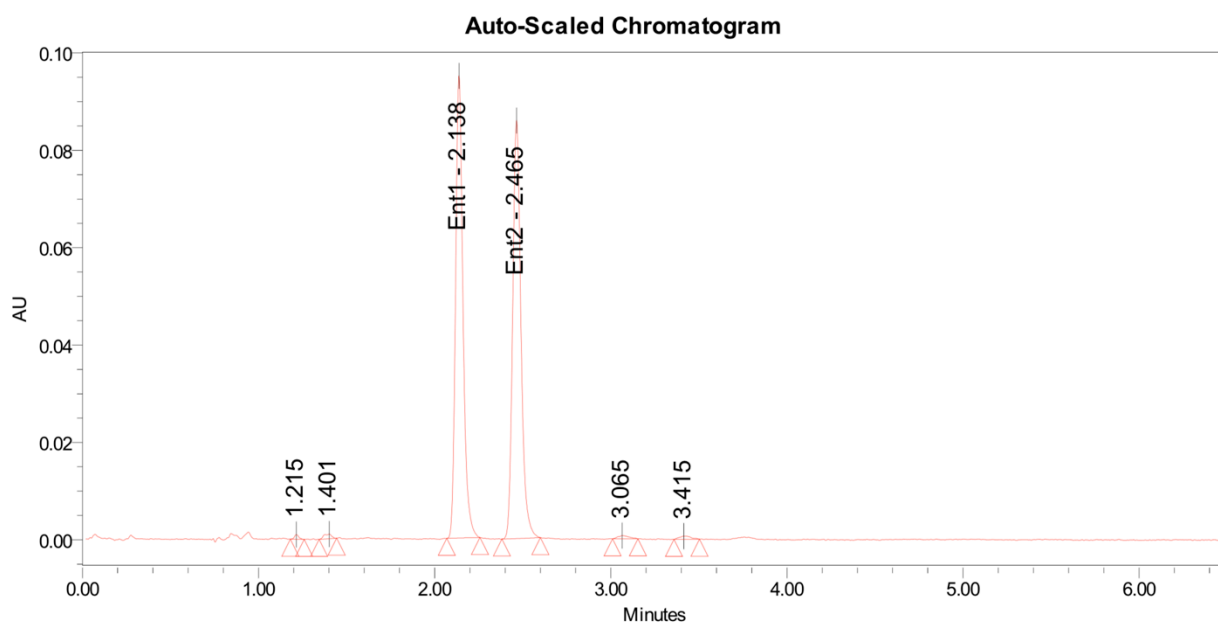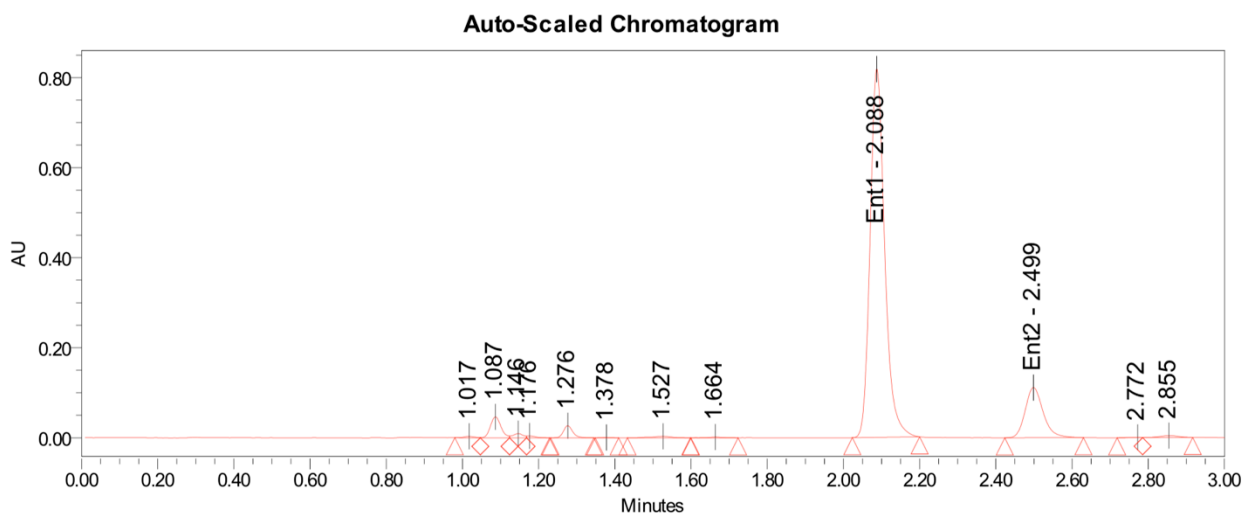

Area Summarized by Name

| SampleName    | ent1  | ent2  | ee    | Ent1    | Ent2   |
|---------------|-------|-------|-------|---------|--------|
| 1 ZL-5-member | 49.83 | 50.17 | -0.35 | 277875  | 279800 |
| 2 LZ-57-1     | 85.58 | 14.42 | 71.16 | 2173472 | 366285 |

SFC Chromatograms of **4b**

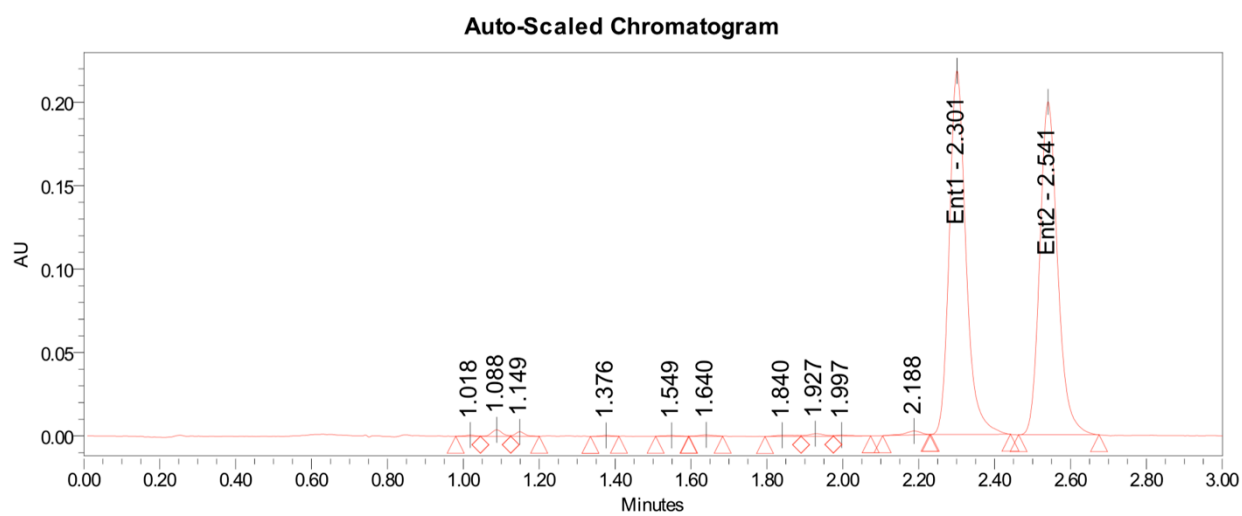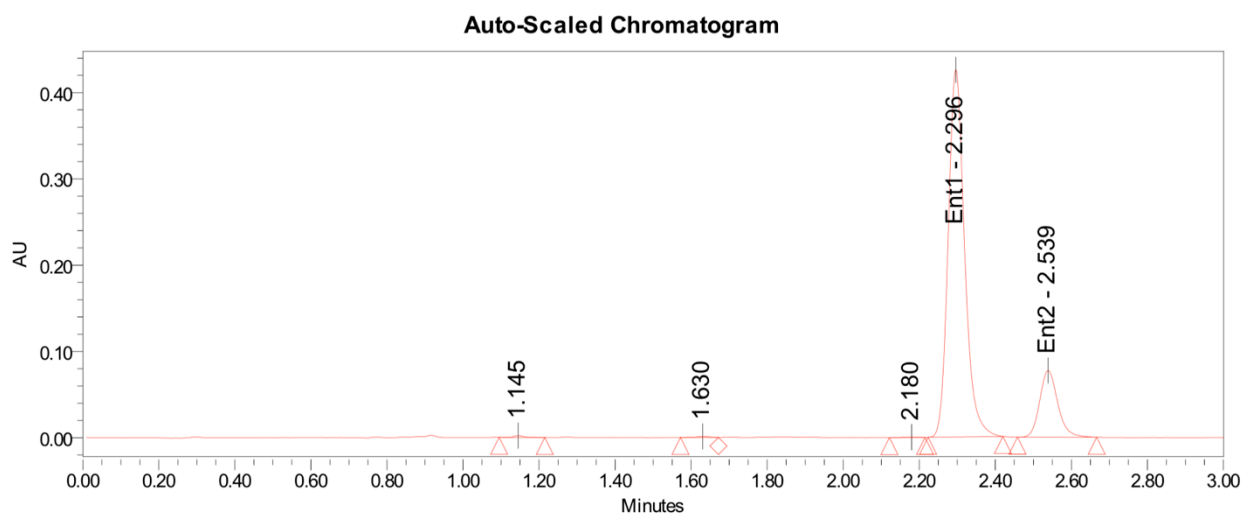

Area Summarized by Name

| SampleName | ent1  | ent2  | ee    | Ent1    | Ent2   |
|------------|-------|-------|-------|---------|--------|
| 1 Rac-B    | 50.38 | 49.62 | 0.75  | 663517  | 653579 |
| 2 LZ-57-2  | 83.40 | 16.60 | 66.81 | 1276993 | 254111 |

SFC Chromatograms of **4c**

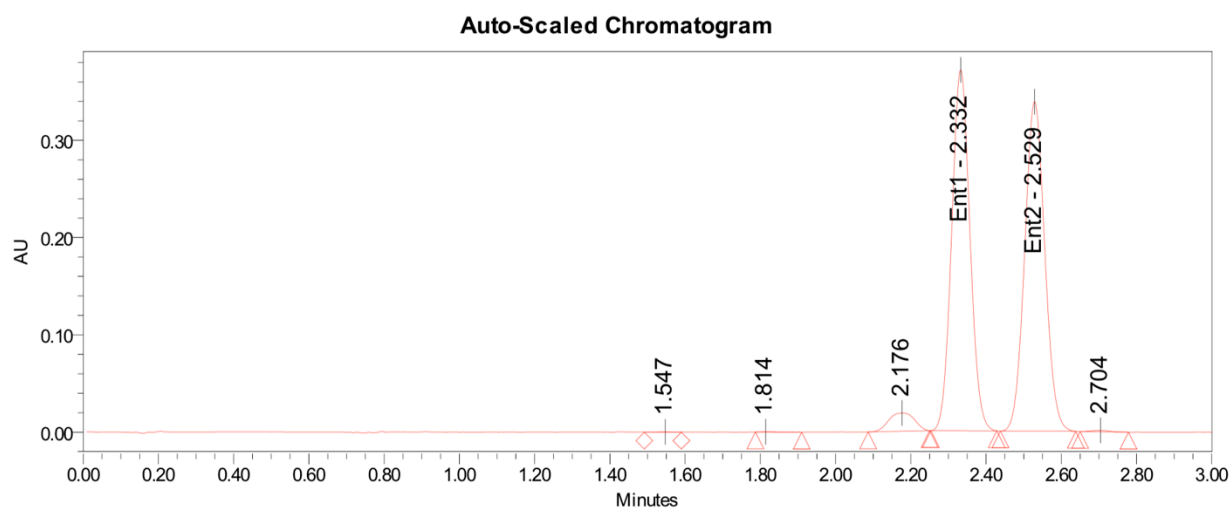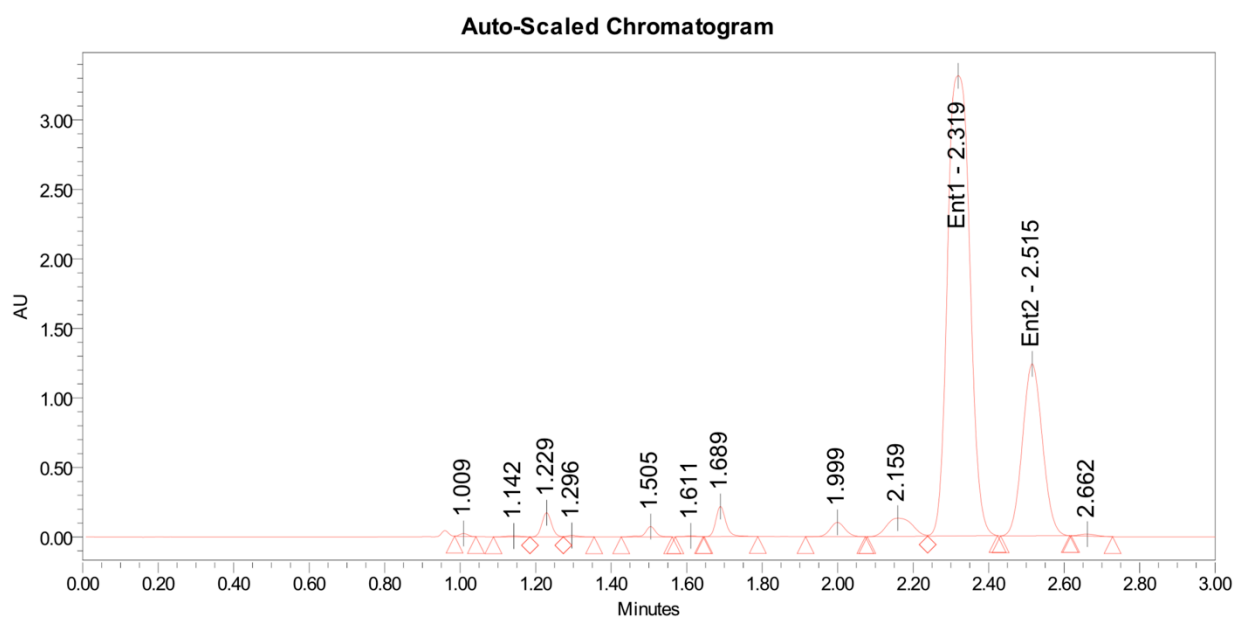

Area Summarized by Name

| SampleName    | ent1  | ent2  | ee    | Ent1     | Ent2    |
|---------------|-------|-------|-------|----------|---------|
| 1 LZ-70-3-rac | 49.81 | 50.19 | -0.38 | 1250546  | 1260159 |
| 2 LZ-42-2     | 74.97 | 25.03 | 49.94 | 13664993 | 4562767 |

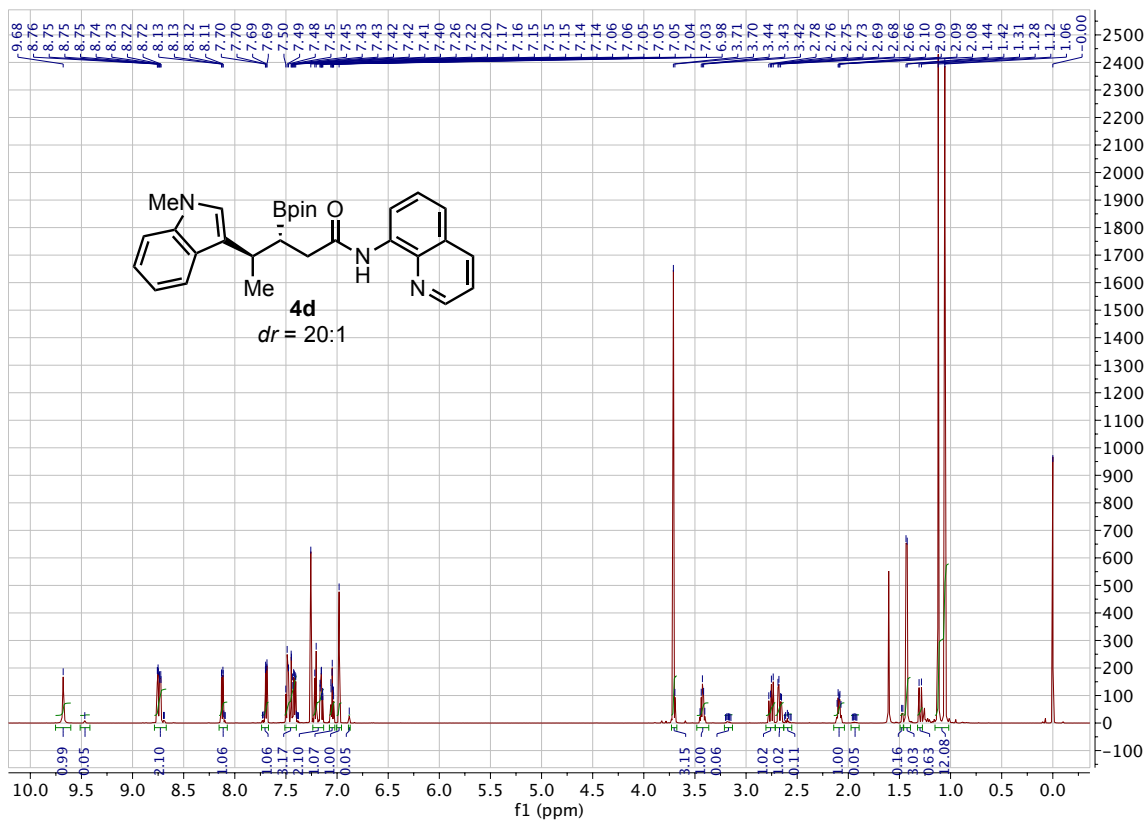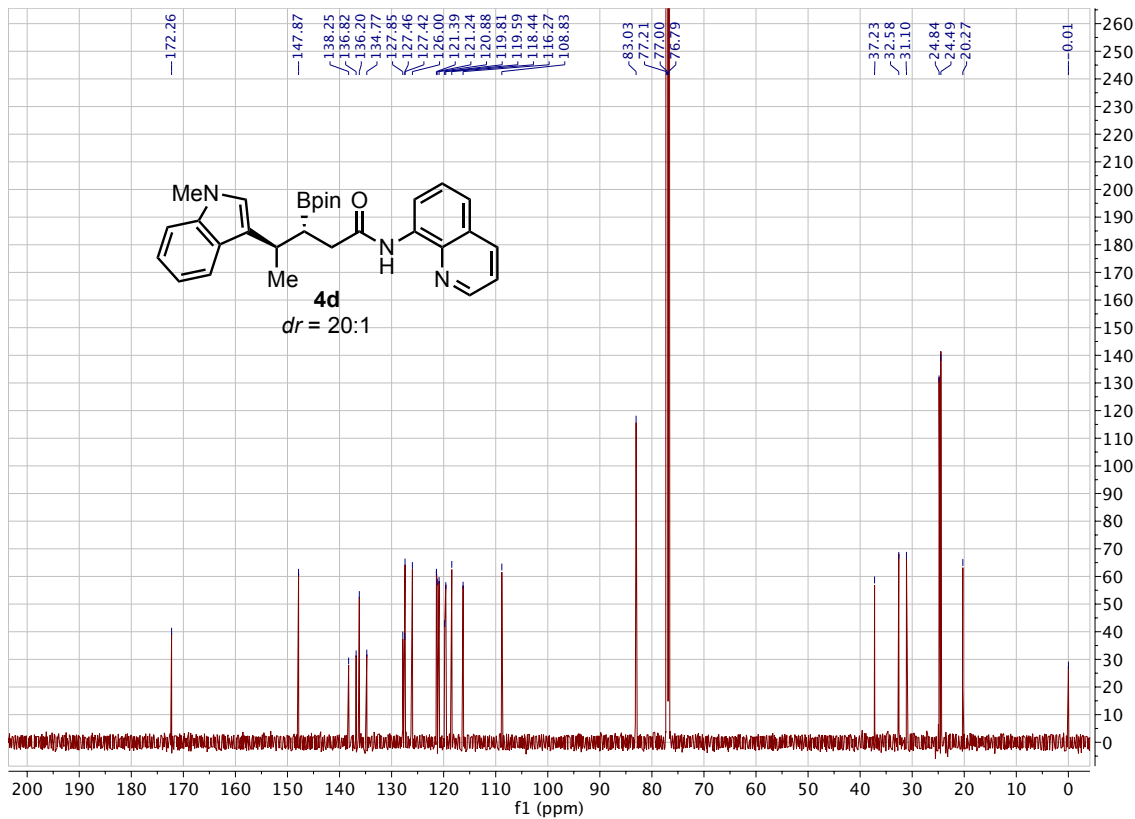

SFC Chromatograms of **4d**

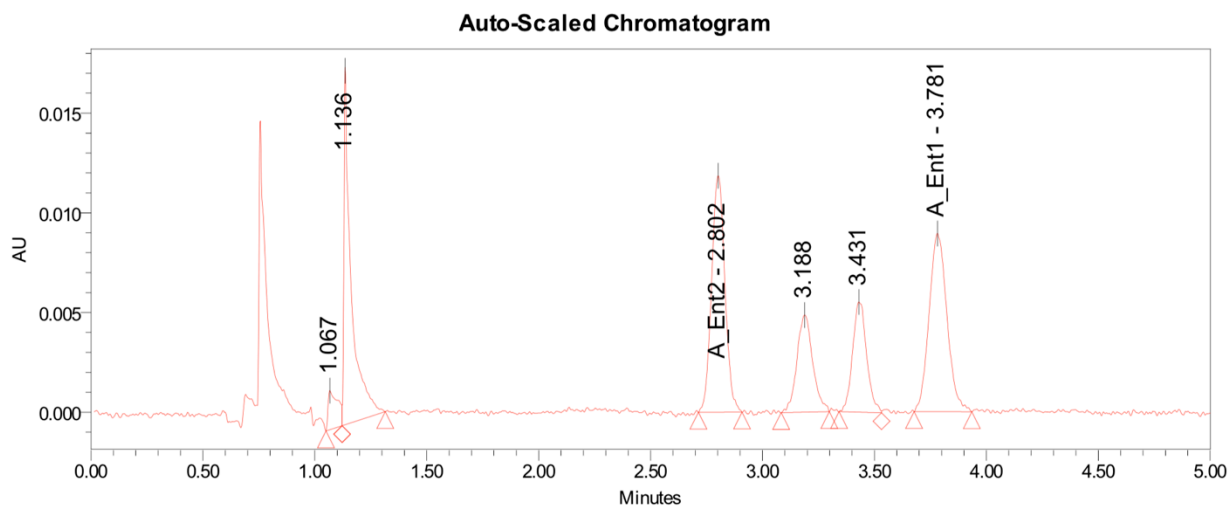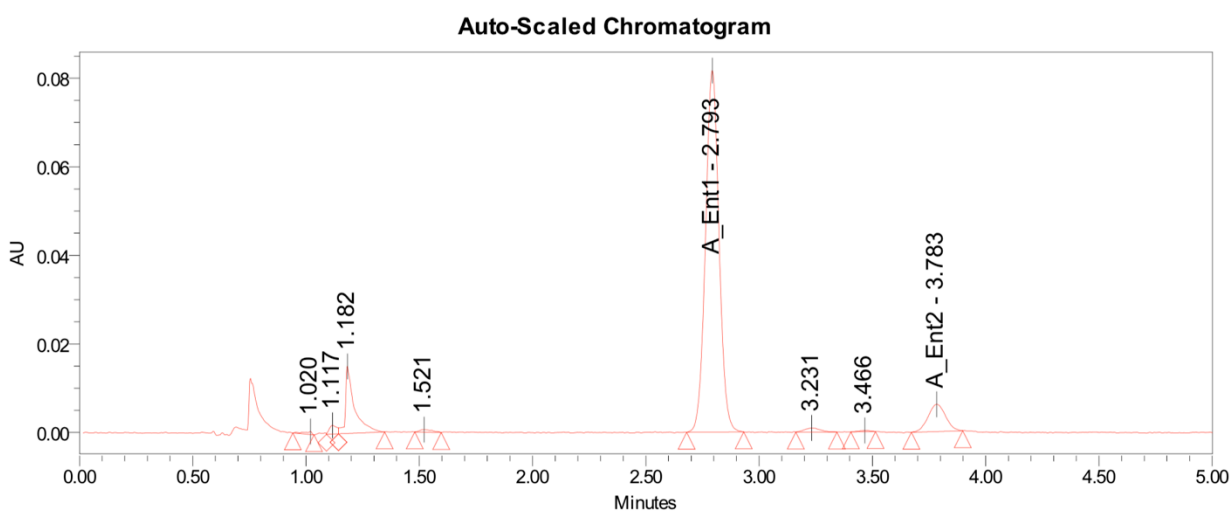

Area Summarized by Name

| SampleName    | ent1  | ent2  | ee    | Ent1   | Ent2  |
|---------------|-------|-------|-------|--------|-------|
| 1ENG0177A_SFC | 50.35 | 49.65 | 0.70  | 49043  | 49731 |
| 2LZ-22-4      | 91.05 | 8.95  | 82.10 | 338533 | 33271 |

SFC Chromatograms of 4e

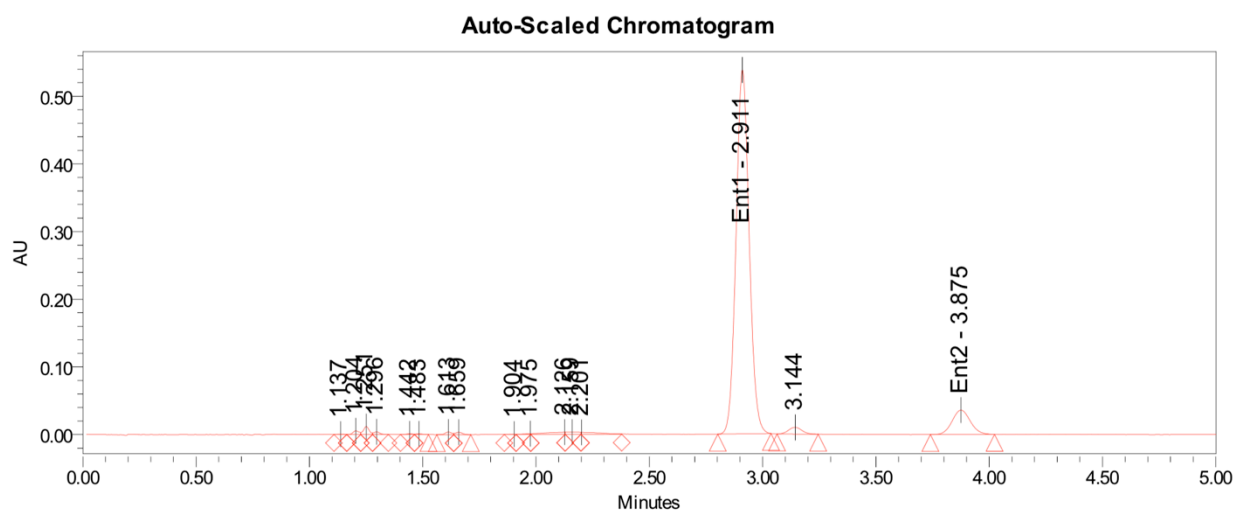

Area Summarized by Name

| SampleName | ent1  | ent2 | ee    | Ent1    | Ent2   |
|------------|-------|------|-------|---------|--------|
| LZ-60-1    | 91.49 | 8.51 | 82.98 | 2163391 | 201223 |

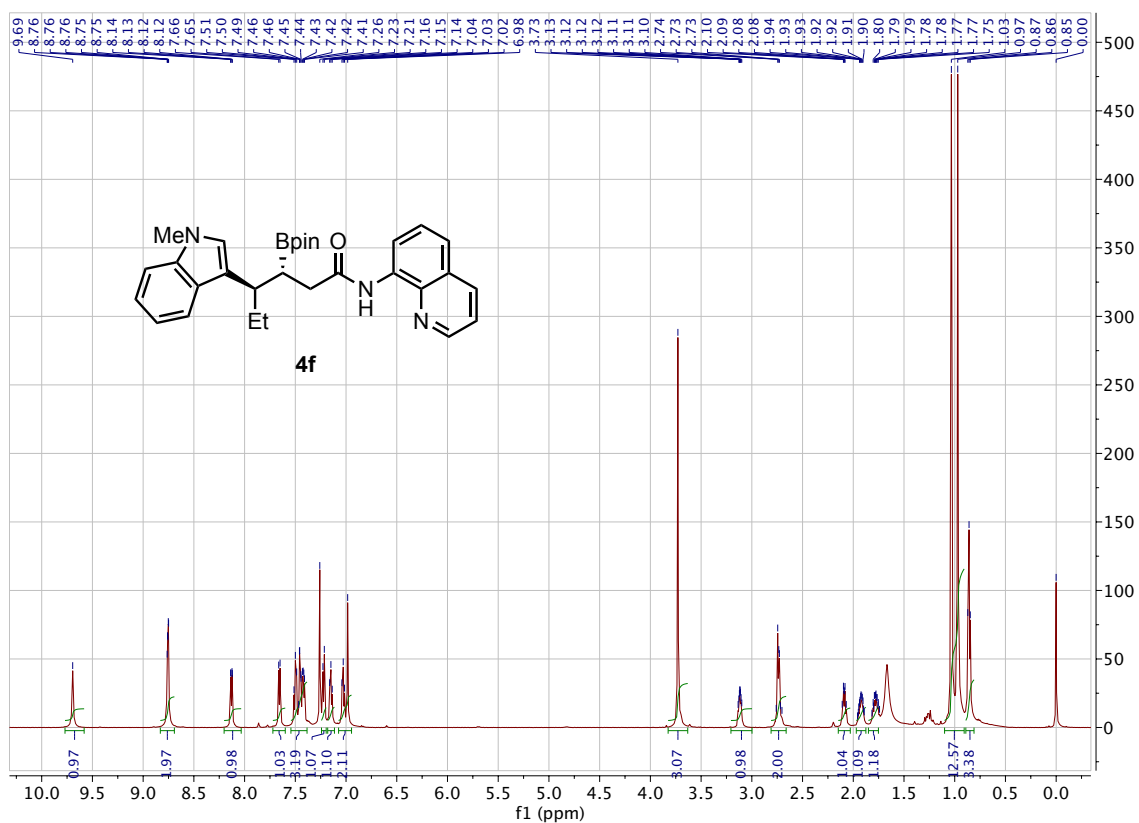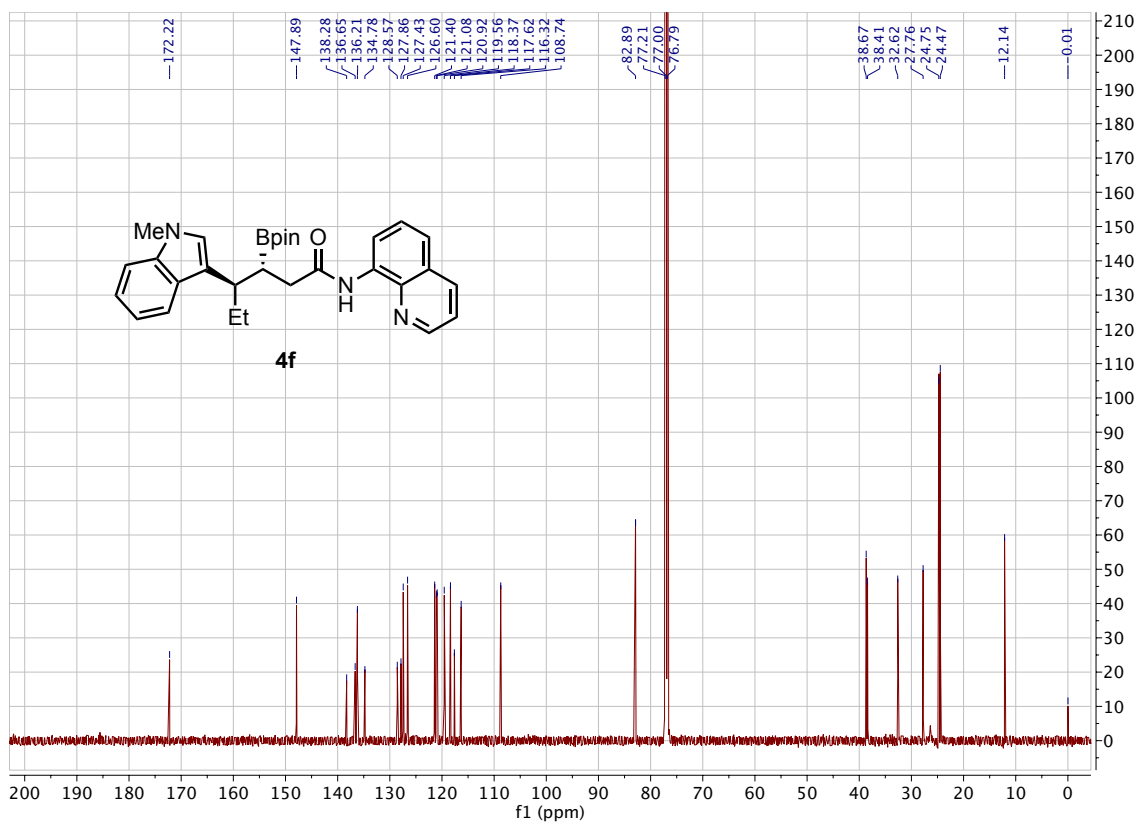

SFC Chromatograms of **4f**

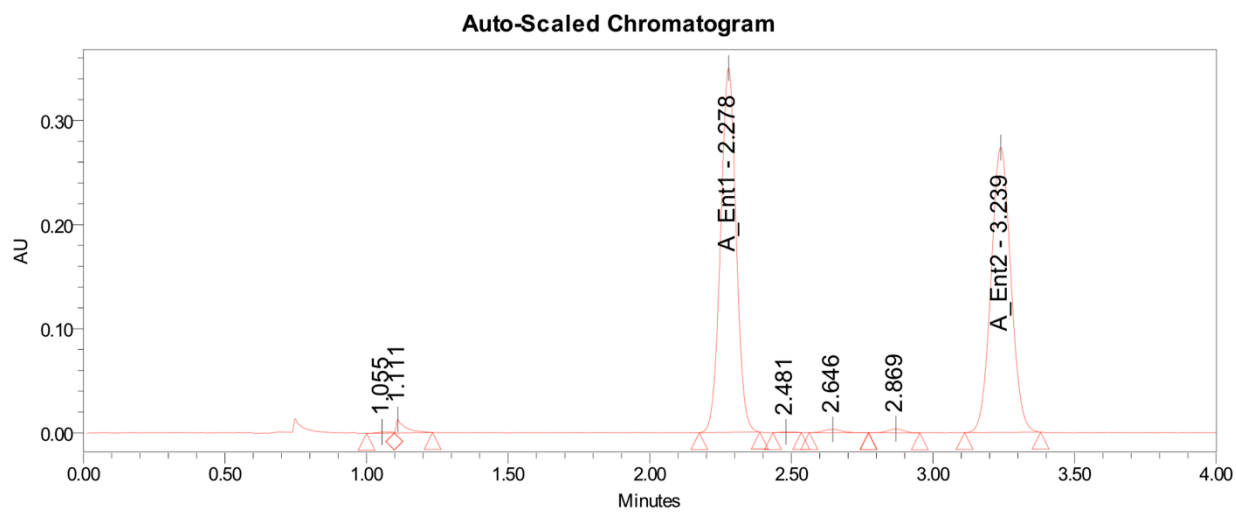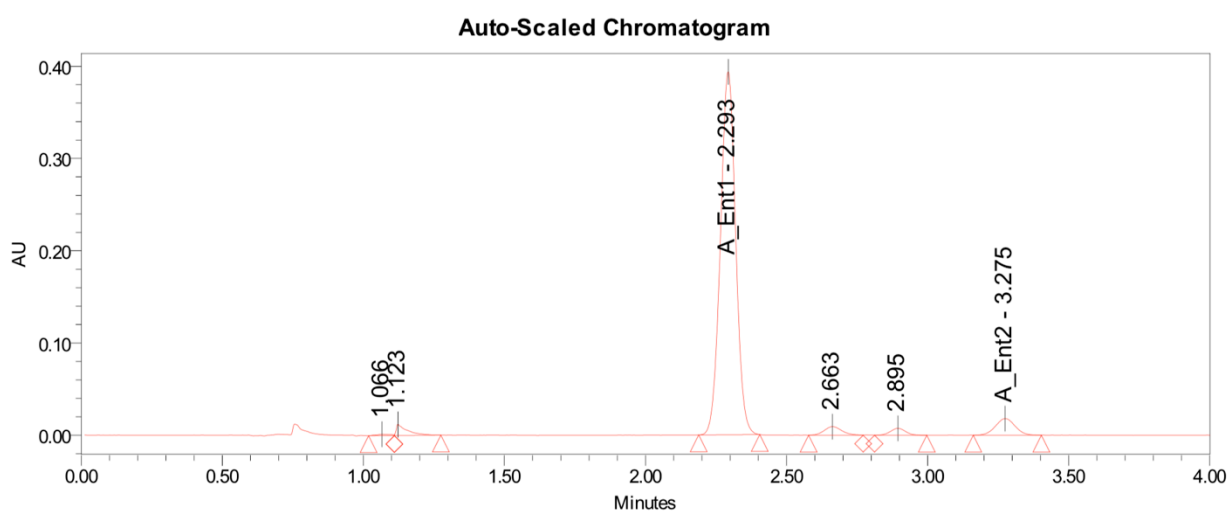

Area Summarized by Name

|   | SampleName | ent1  | ent2  | ee    | A_Ent1  | A_Ent2  |
|---|------------|-------|-------|-------|---------|---------|
| 1 | rac        | 50.06 | 49.94 | 0.11  | 1331485 | 1328491 |
| 2 | LZ-39-1    | 94.43 | 5.57  | 88.86 | 1475223 | 86989   |



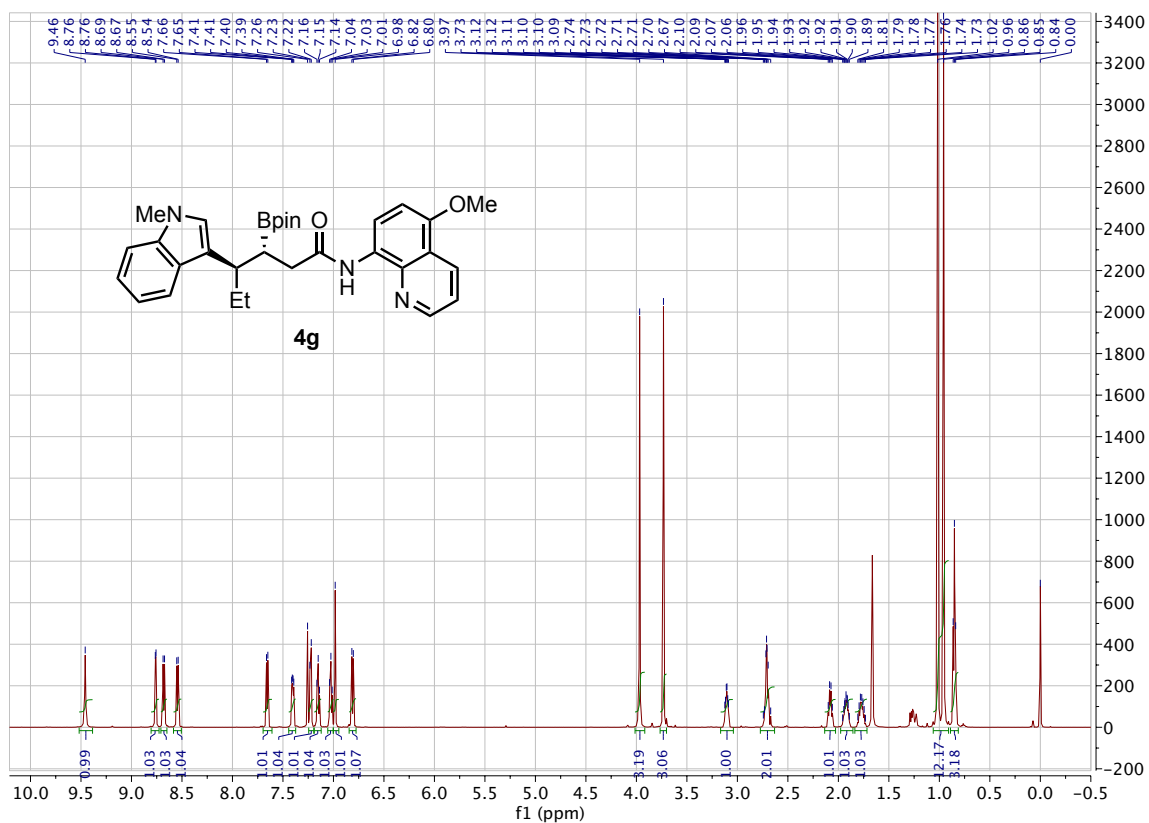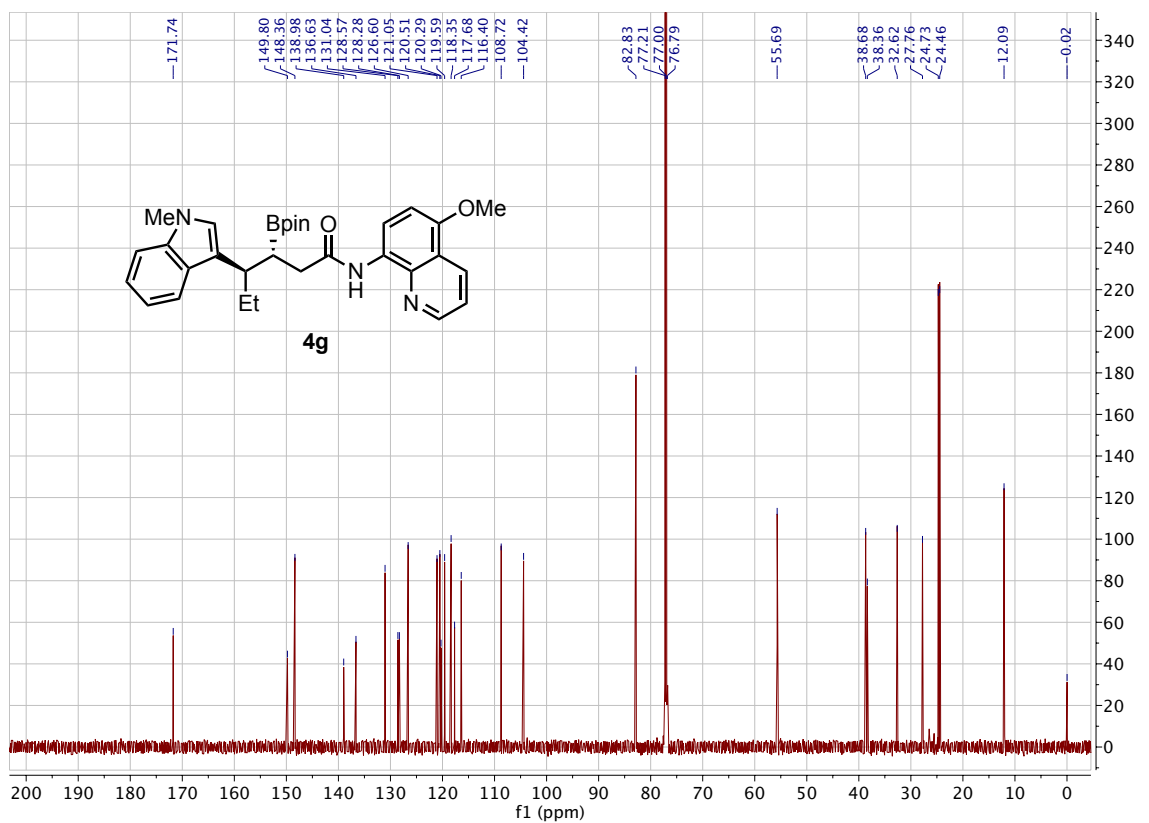

SFC Chromatograms of 4g

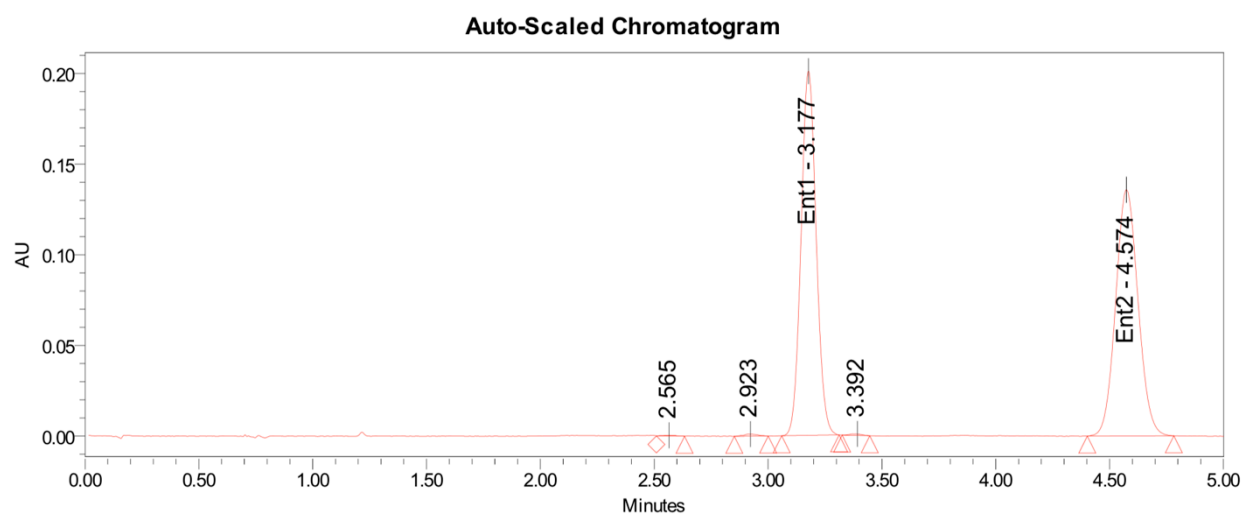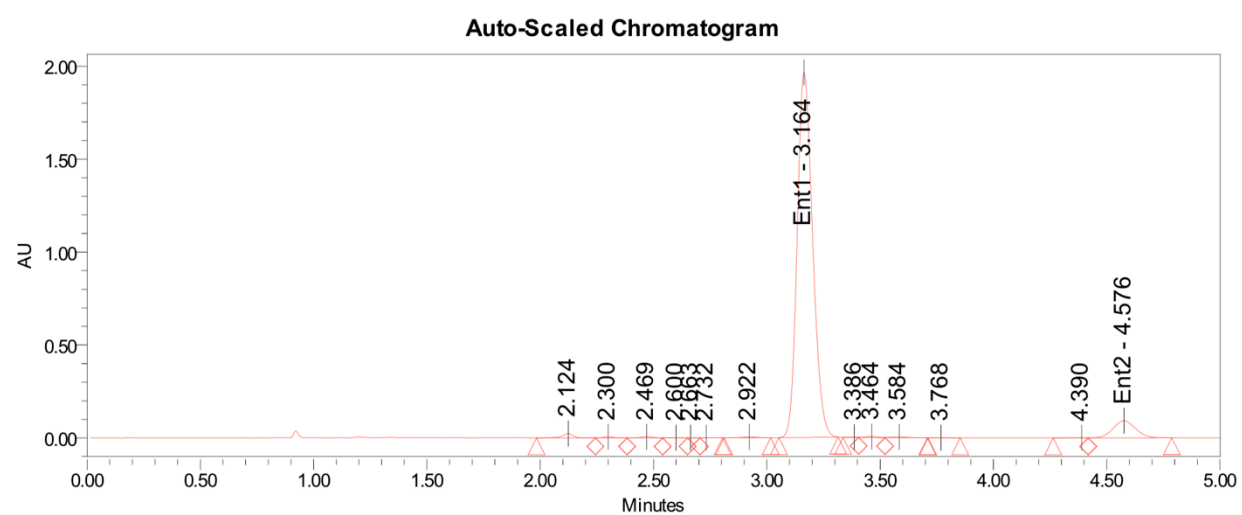

Area Summarized by Name

|   | SampleName  | ent1  | ent2  | ee    | Ent1    | Ent2   |
|---|-------------|-------|-------|-------|---------|--------|
| 1 | LZ-43-2-rac | 49.93 | 50.07 | -0.14 | 927764  | 930336 |
| 2 | LZ-43-2     | 93.56 | 6.44  | 87.13 | 9289195 | 639042 |

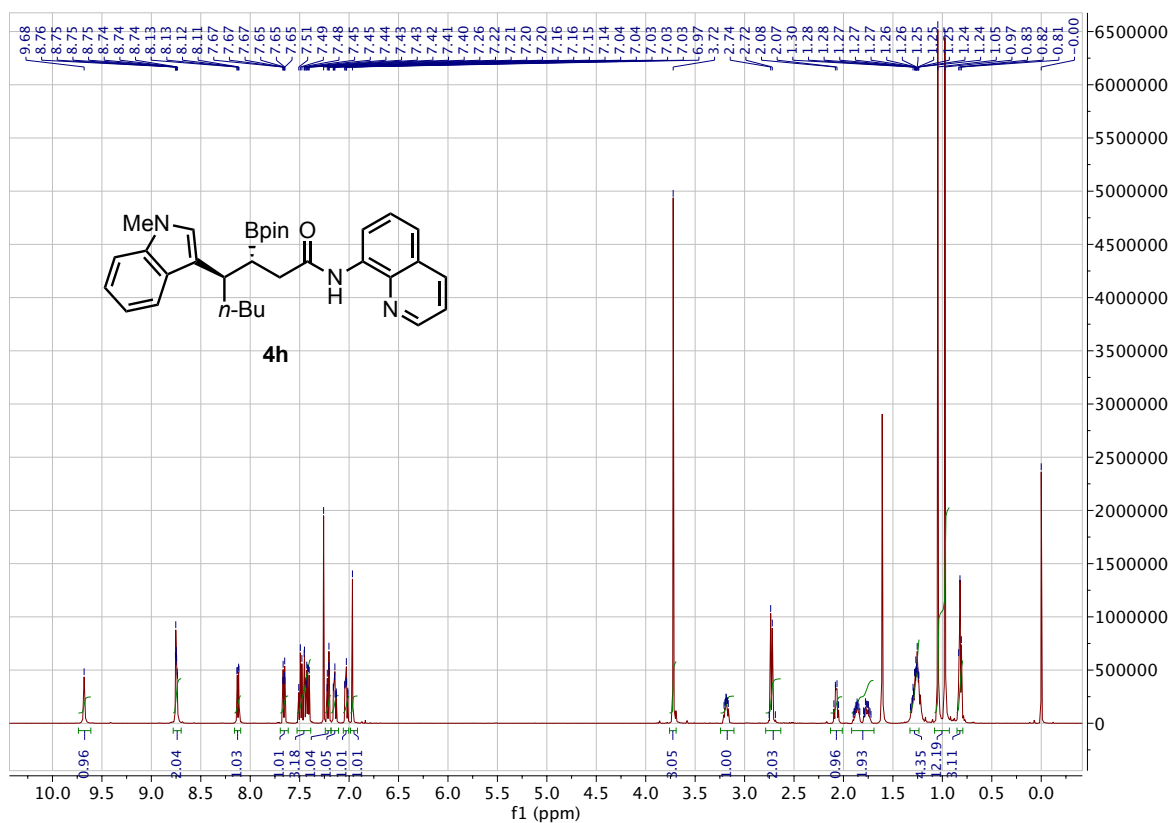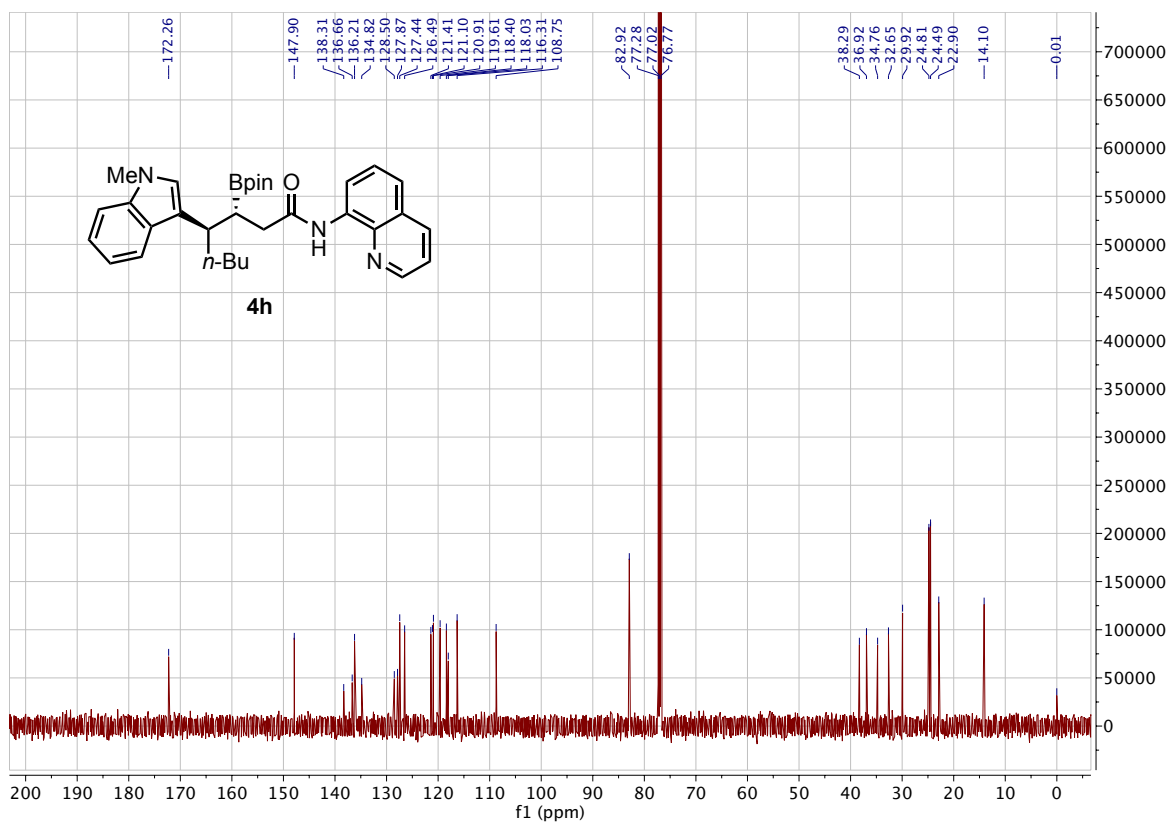

## SFC Chromatograms of 4h

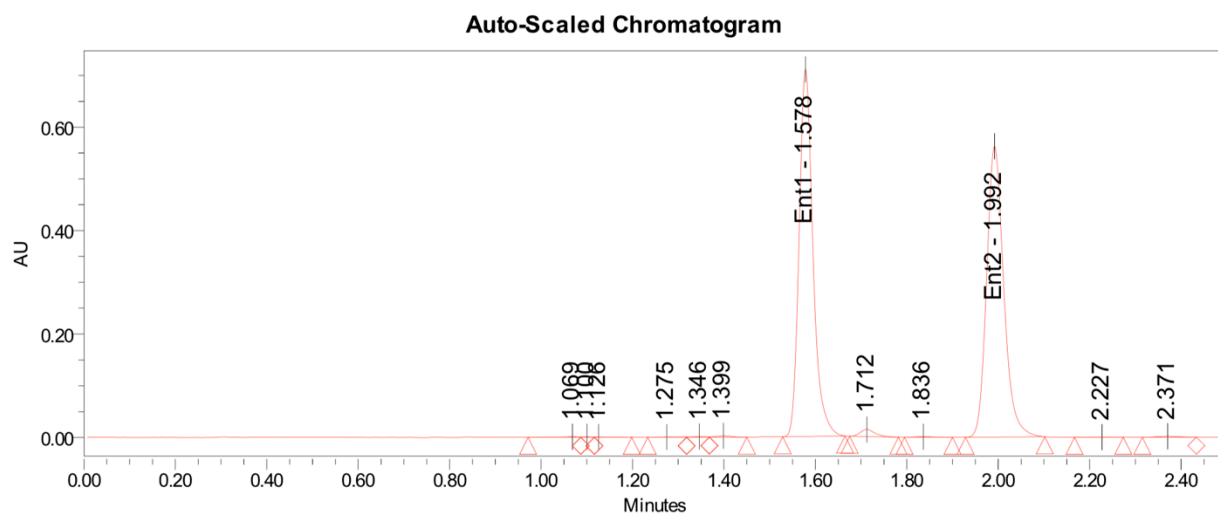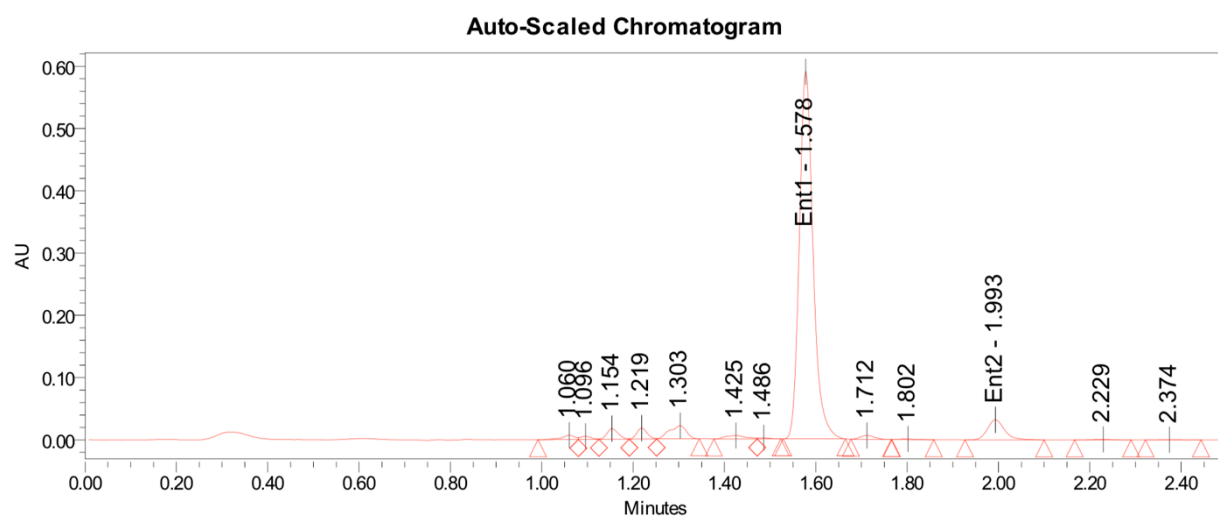

### Area Summarized by Name

|   | SampleName | ent1  | ent2  | ee    | Ent1    | Ent2    |
|---|------------|-------|-------|-------|---------|---------|
| 1 | Bu-rac     | 50.48 | 49.52 | 0.96  | 1491500 | 1463005 |
| 1 | 57-3       | 93.62 | 6.38  | 87.25 | 1230857 | 83823   |

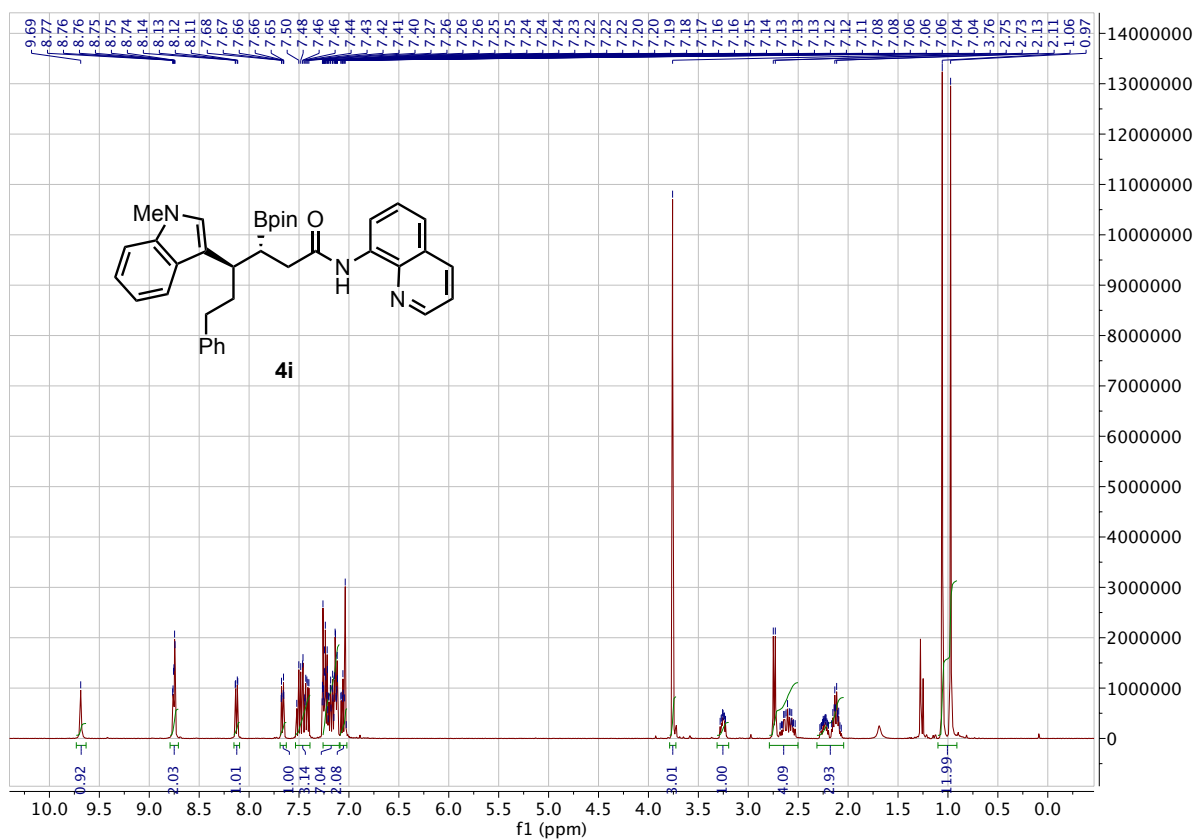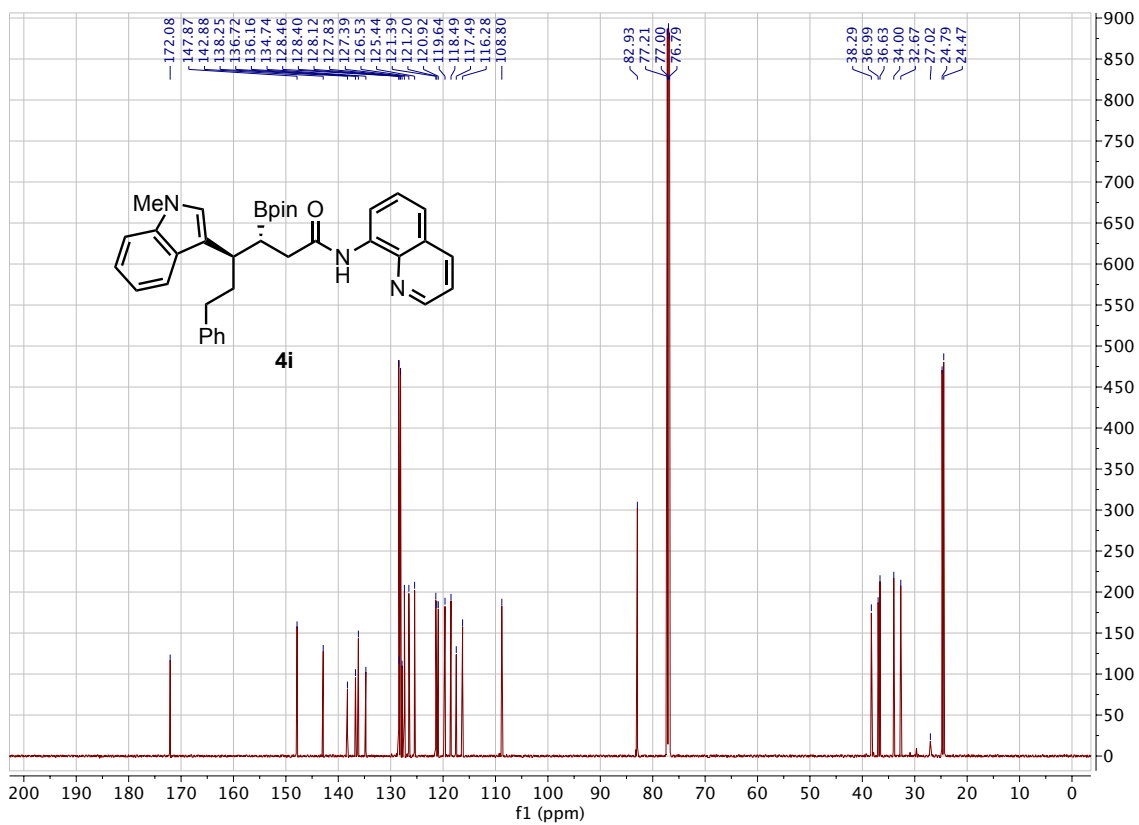

SFC Chromatograms of **4i**

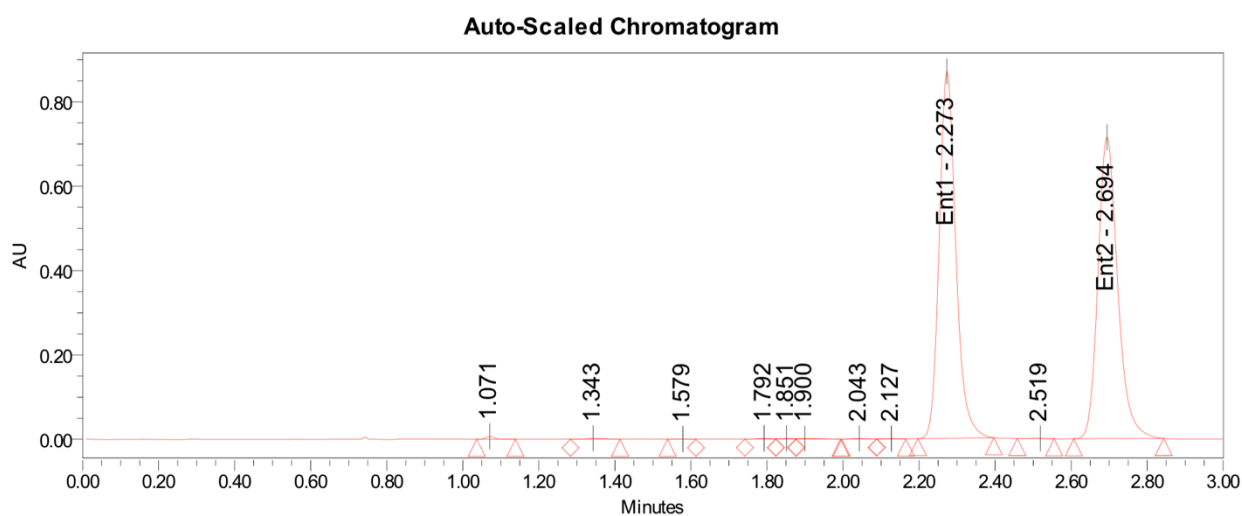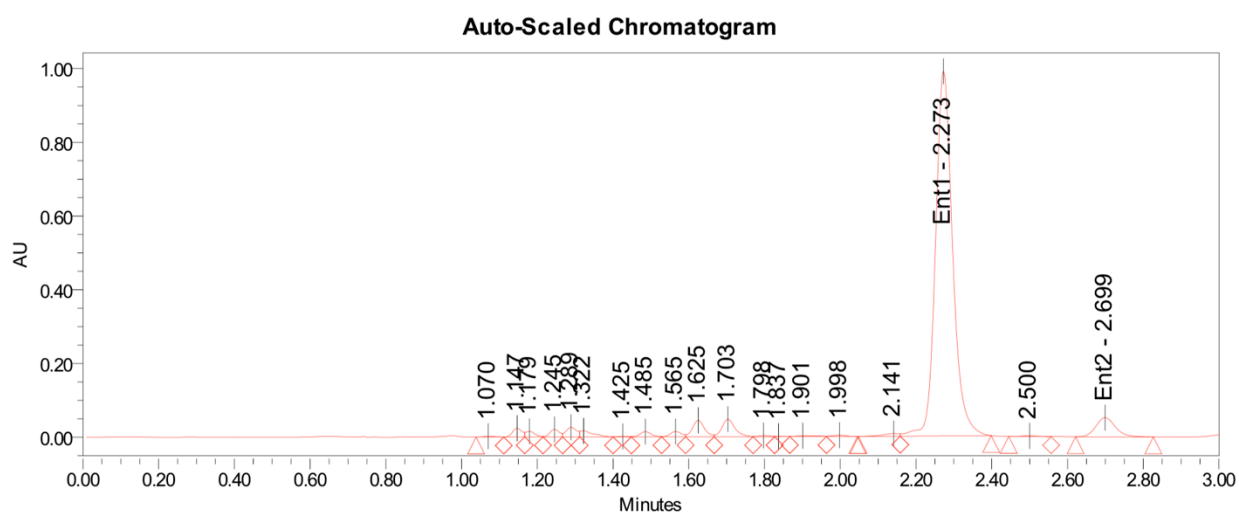

Area Summarized by Name

| SampleName    | ent1  | ent2  | ee    | Ent1    | Ent2    |
|---------------|-------|-------|-------|---------|---------|
| 1 LZ-67-3-rac | 50.69 | 49.31 | 1.38  | 2643173 | 2571036 |
| 2 LZ-67-2     | 94.34 | 5.66  | 88.69 | 3113494 | 186680  |

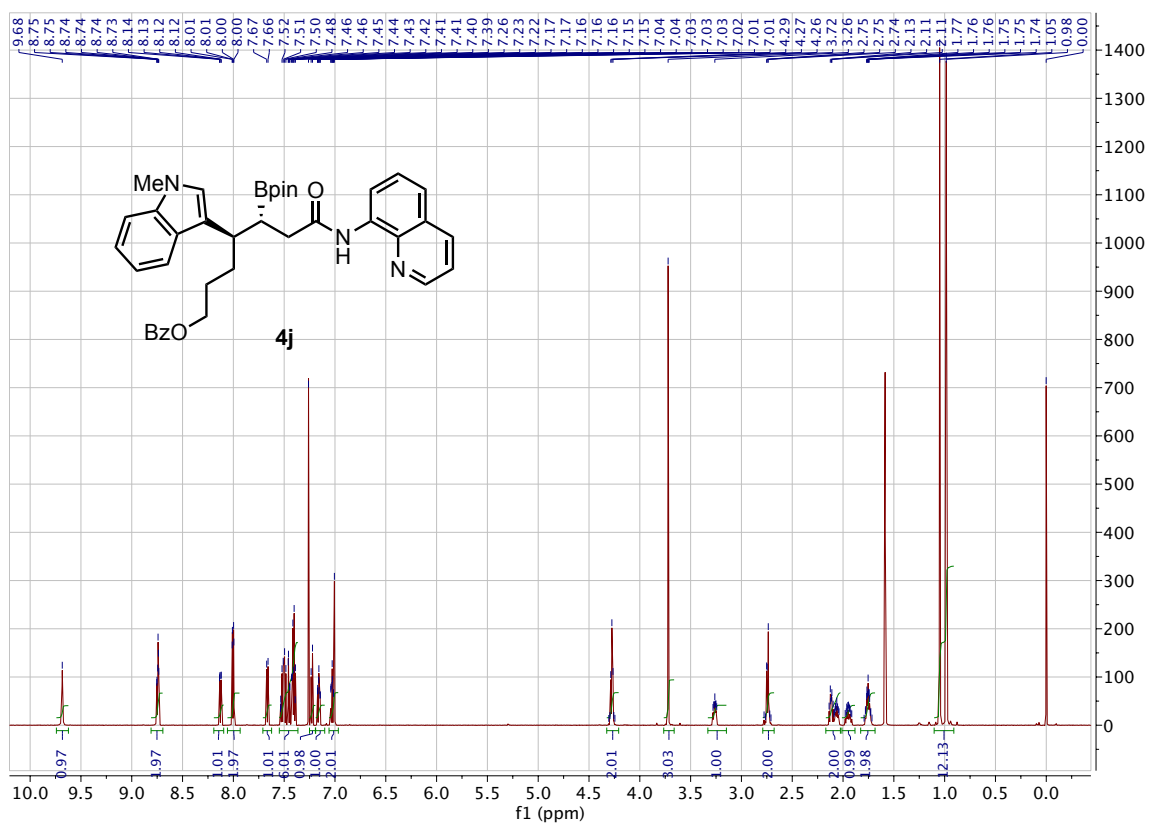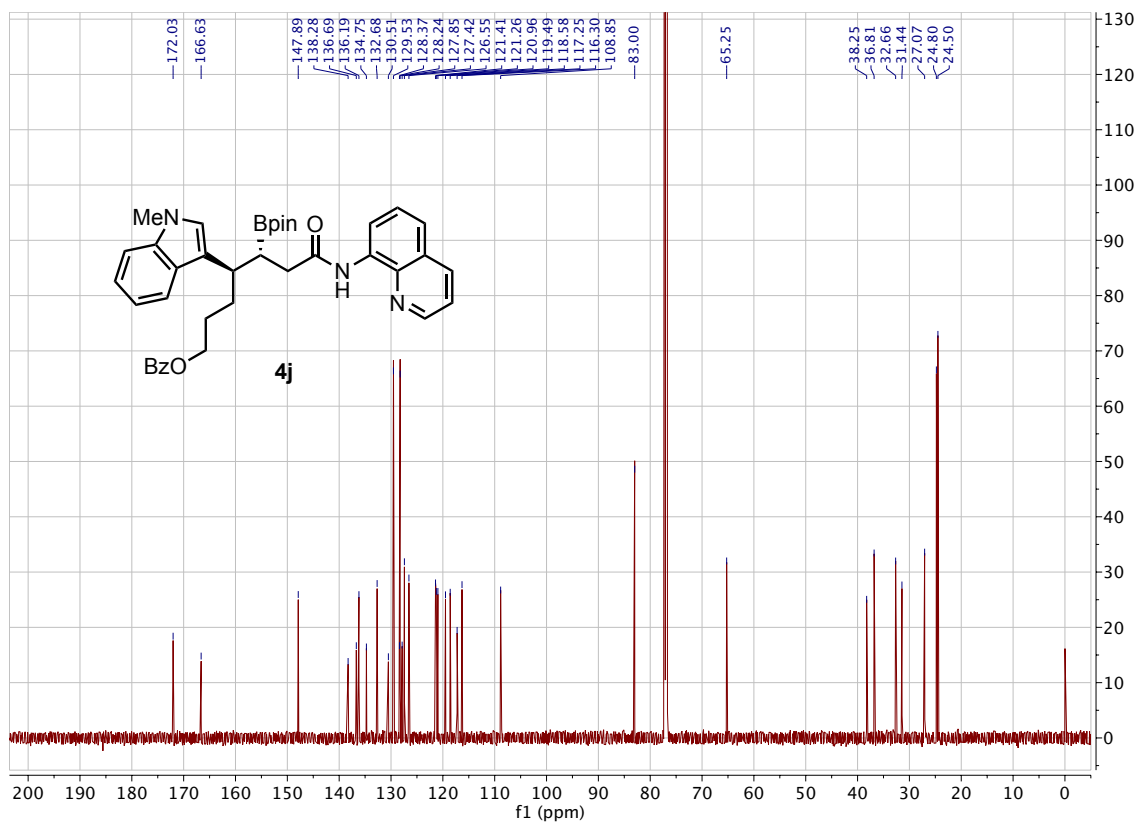

SFC Chromatograms of 4j

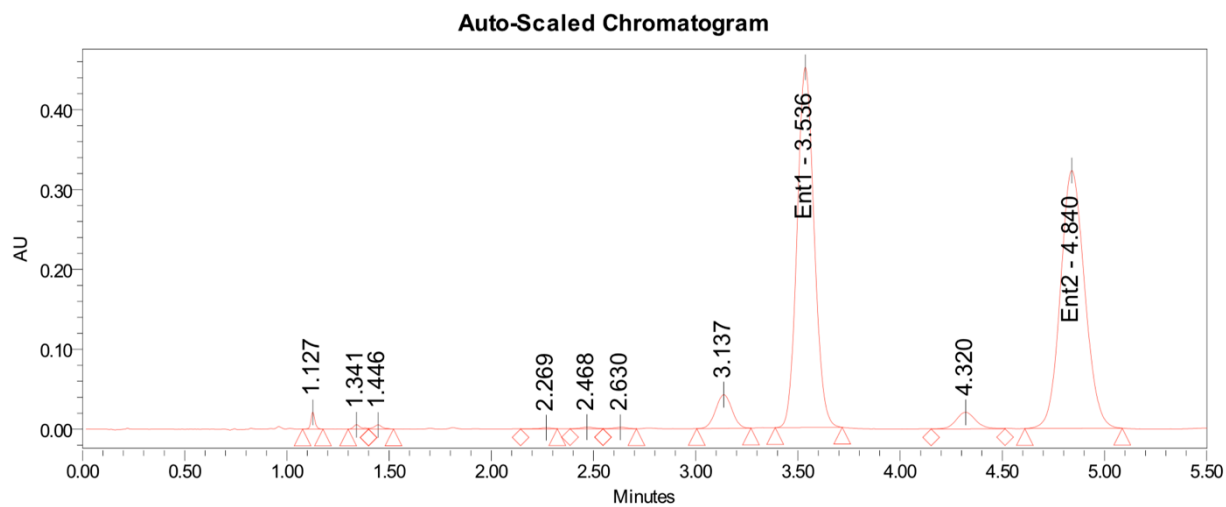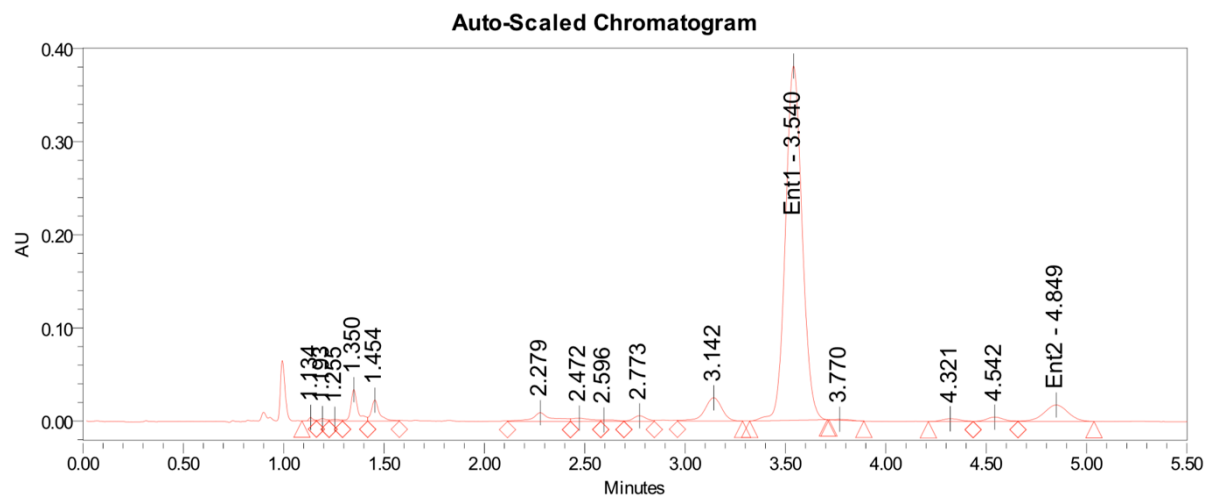

Area Summarized by Name

| SampleName    | ent1  | ent2  | ee    | Ent1    | Ent2    |
|---------------|-------|-------|-------|---------|---------|
| 1 LZ-78-1-rac | 49.54 | 50.46 | -0.92 | 2612581 | 2661317 |
| 2 LZ-78-2     | 93.73 | 6.27  | 87.47 | 2196930 | 146845  |



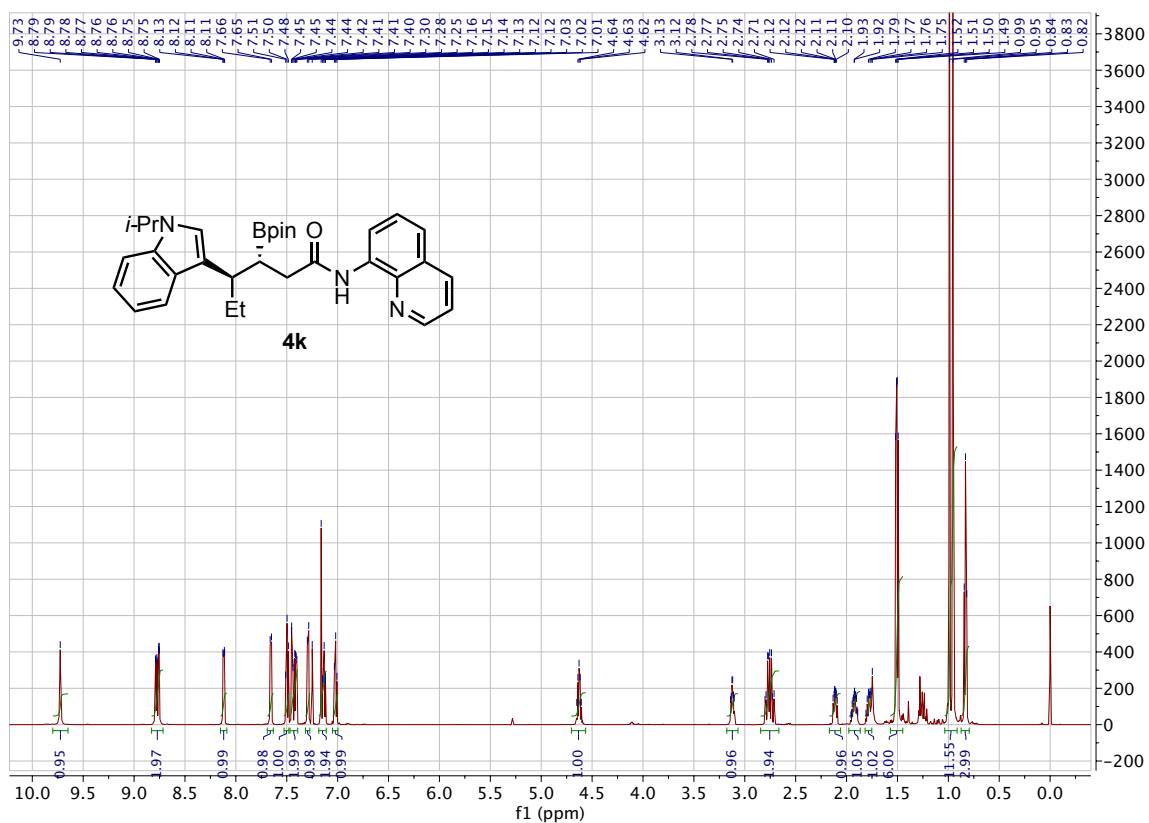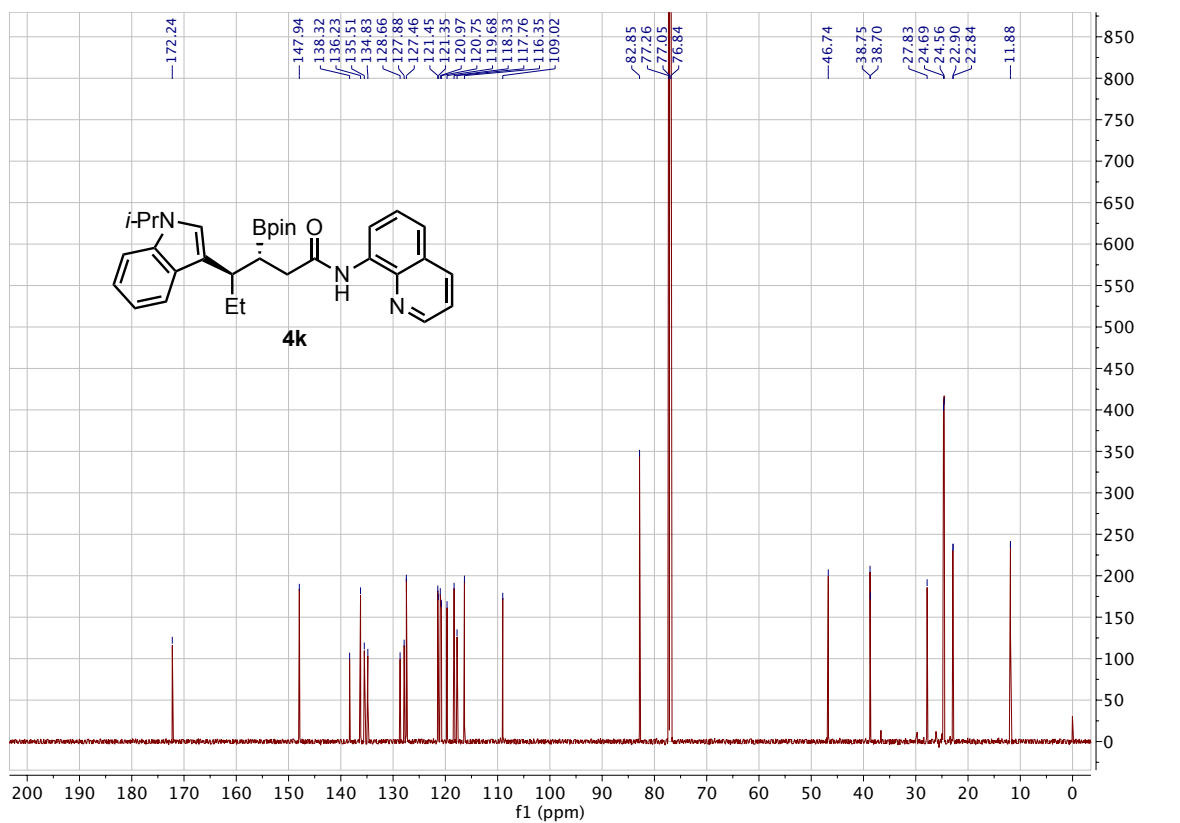

SFC Chromatograms of 4k

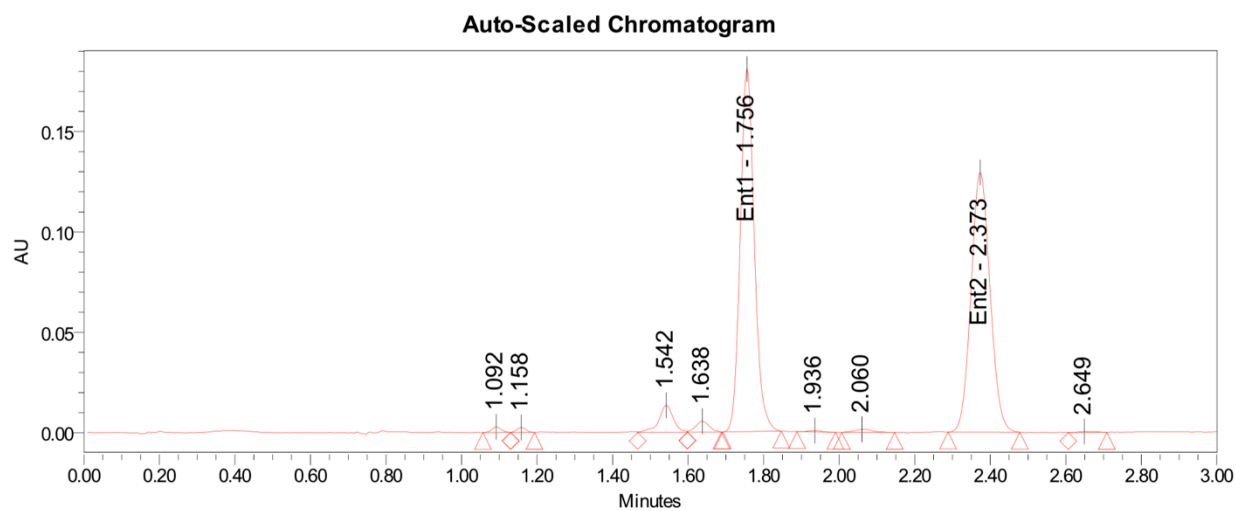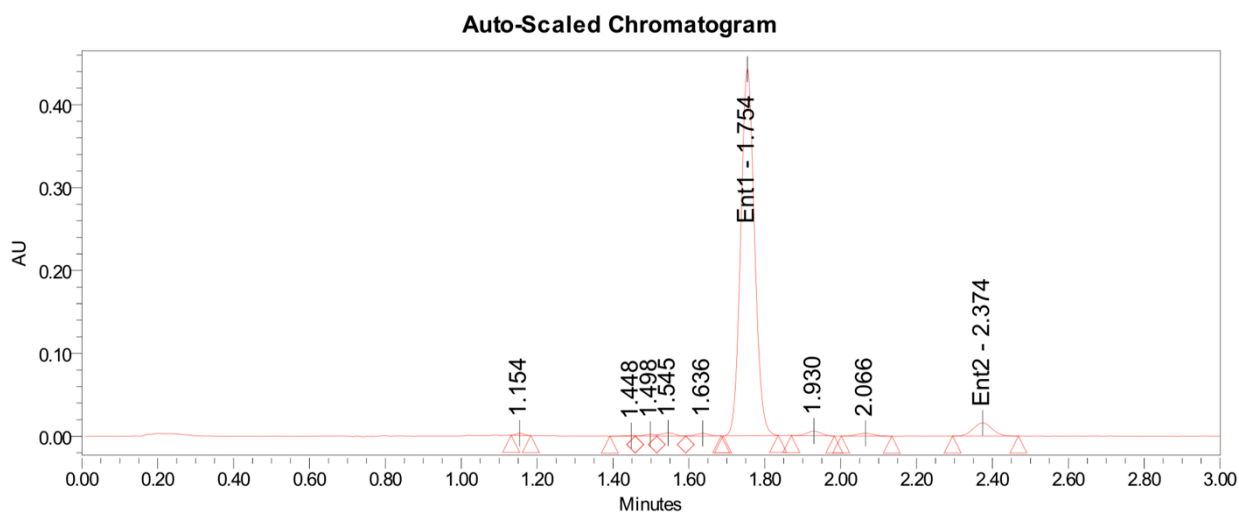

Area Summarized by Name

| SampleName   | ent1  | ent2  | ee    | Ent1    | Ent2   |
|--------------|-------|-------|-------|---------|--------|
| 1 LZ-IPR-Rac | 50.77 | 49.23 | 1.54  | 466922  | 452776 |
| 2 LZ-IPR-1   | 95.28 | 4.72  | 90.56 | 1117490 | 55368  |

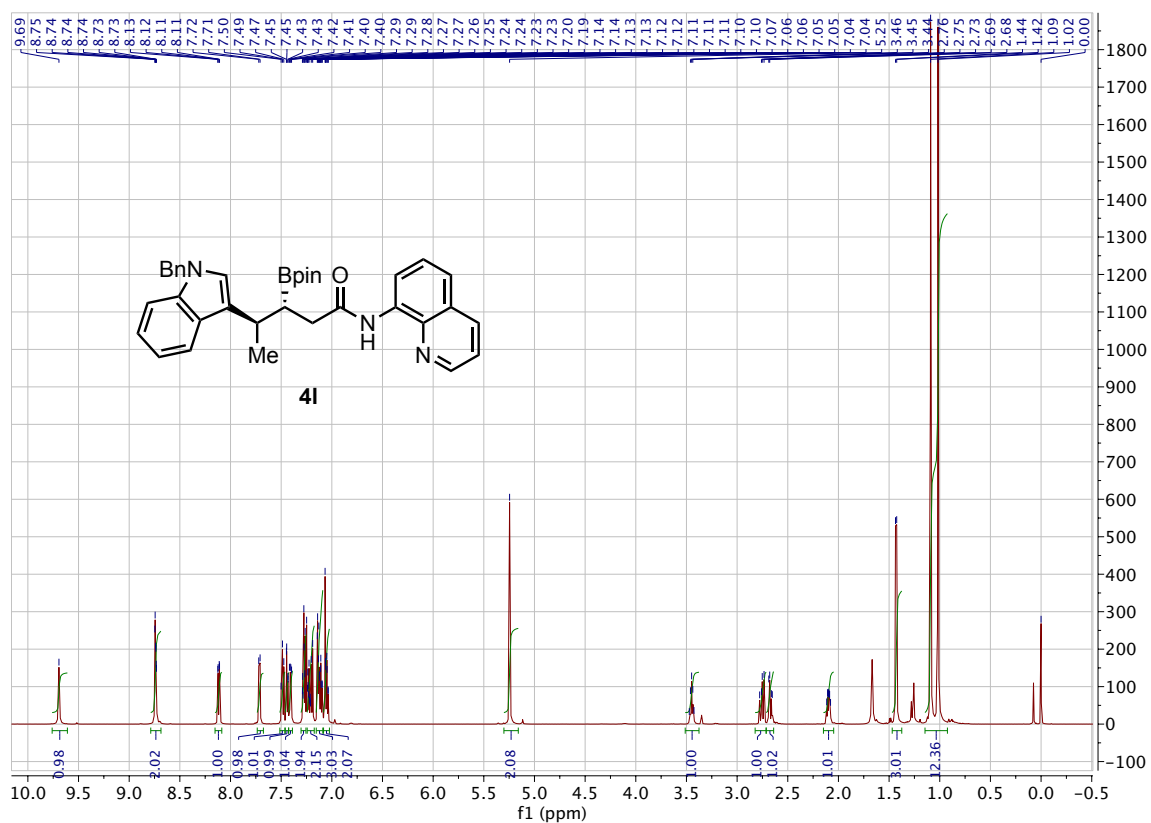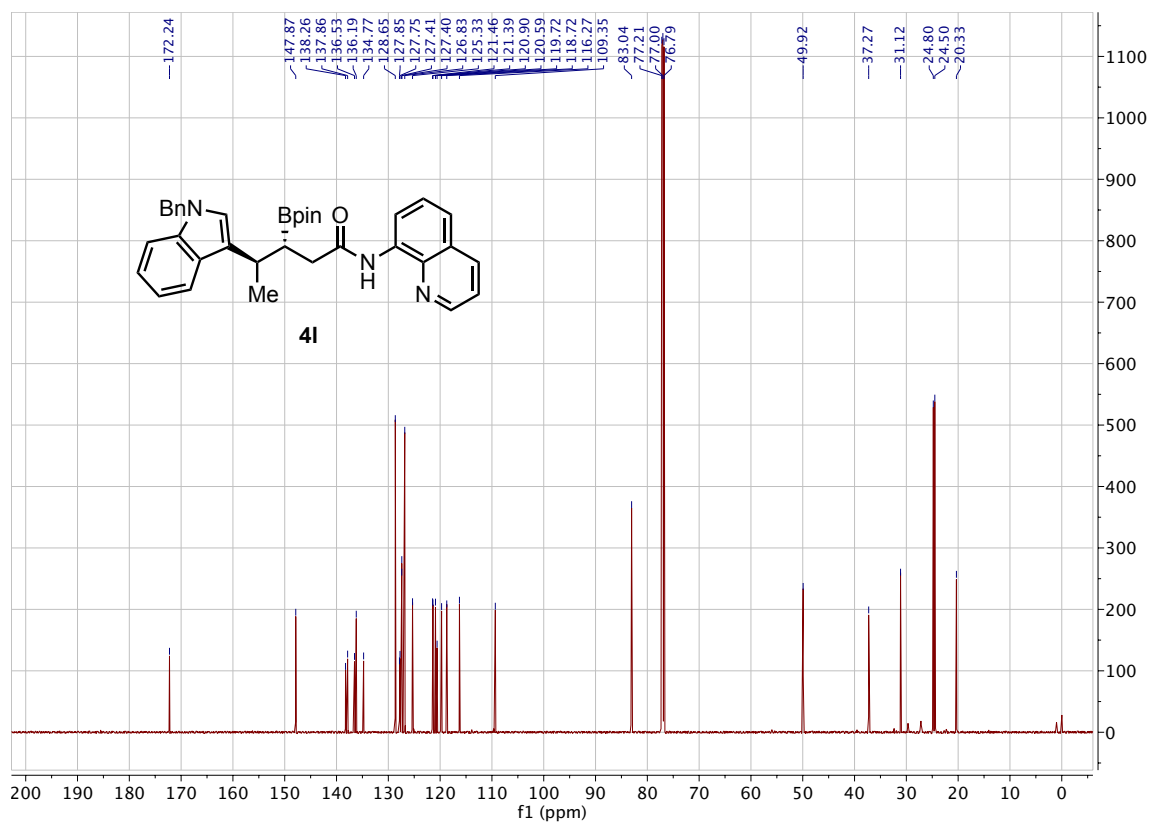

SFC Chromatograms of **41**

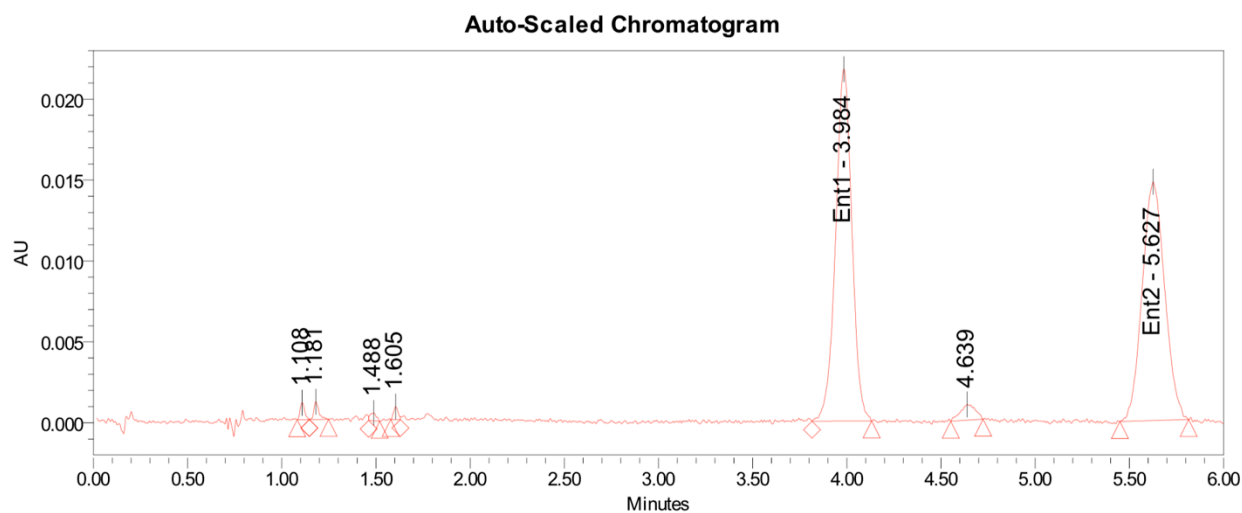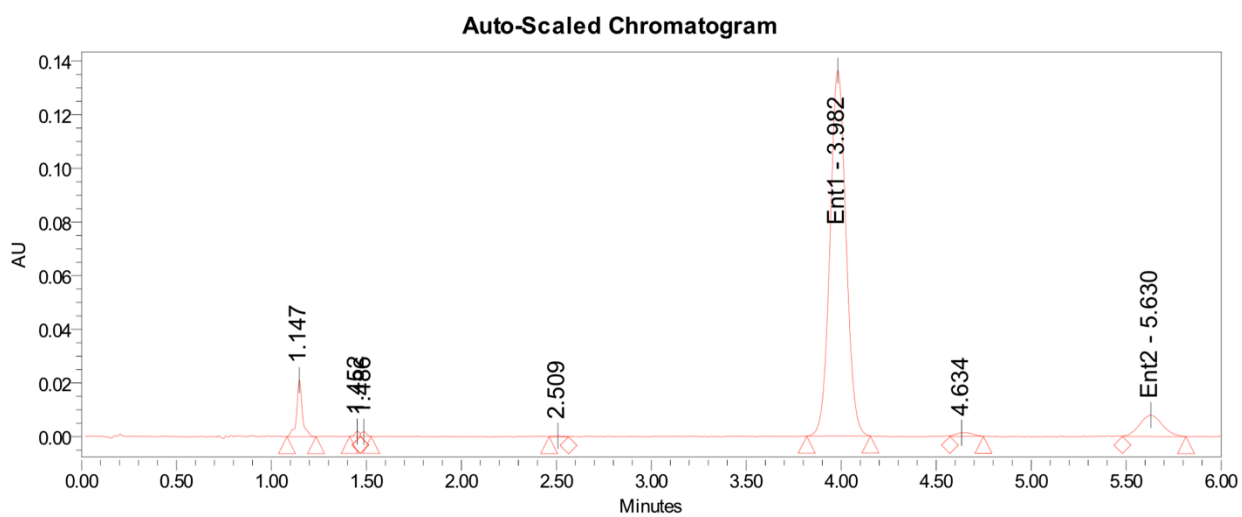

Area Summarized by Name

| SampleName   | ent1  | ent2  | ee    | Ent1   | Ent2   |
|--------------|-------|-------|-------|--------|--------|
| 1 LZ-NBu-Rac | 51.79 | 48.21 | 3.59  | 131292 | 122203 |
| 2 LZ-NBu-1   | 92.27 | 7.73  | 84.53 | 799931 | 67043  |

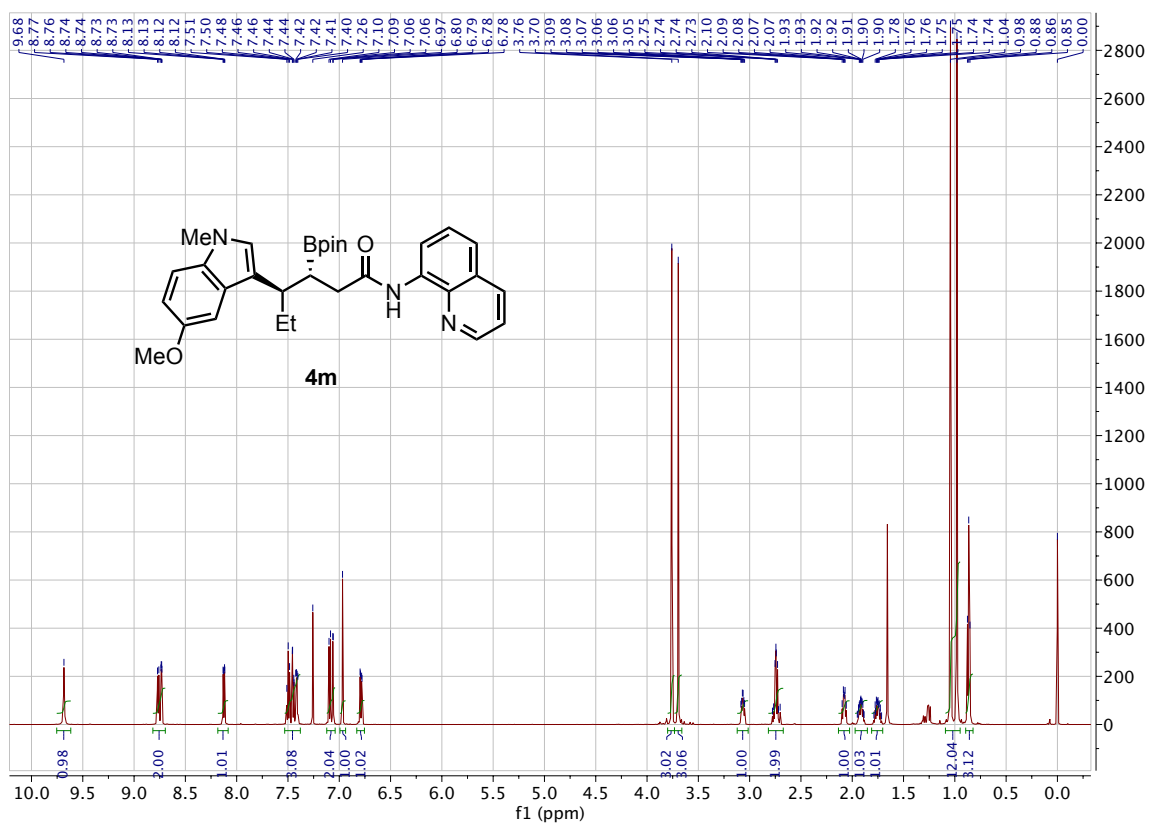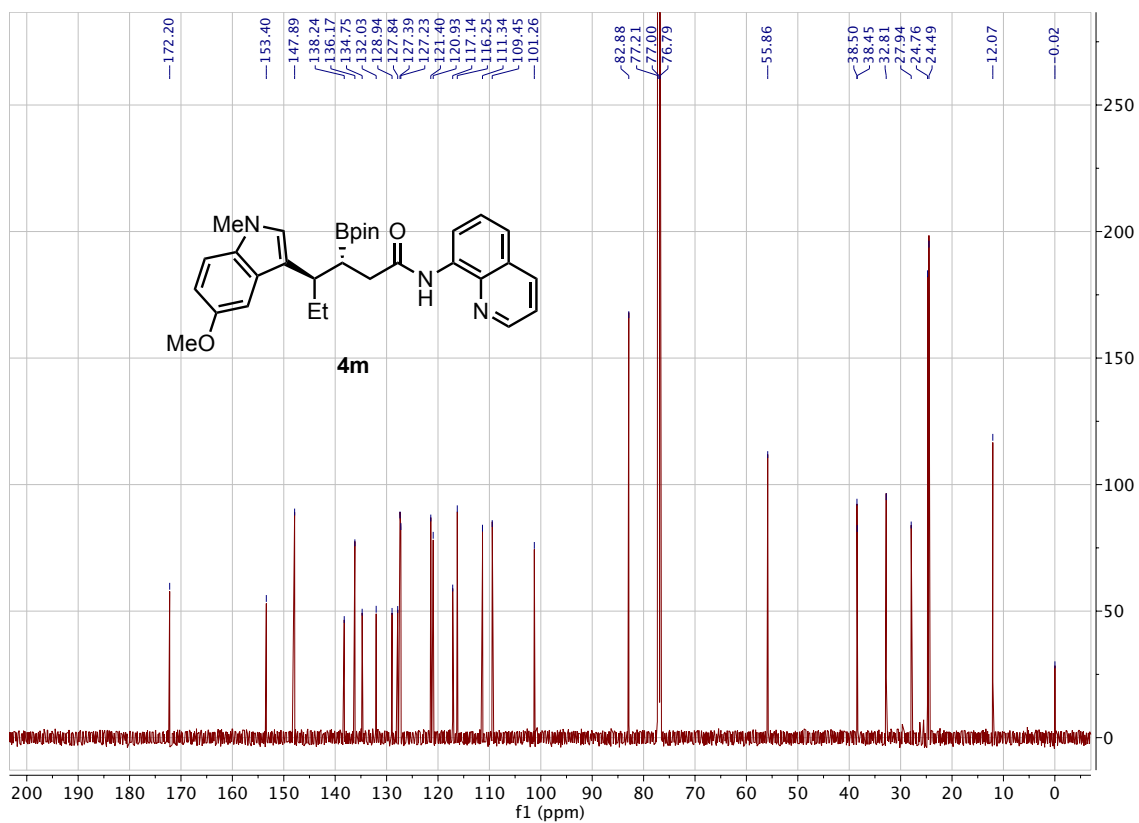

SFC Chromatograms of **4m**

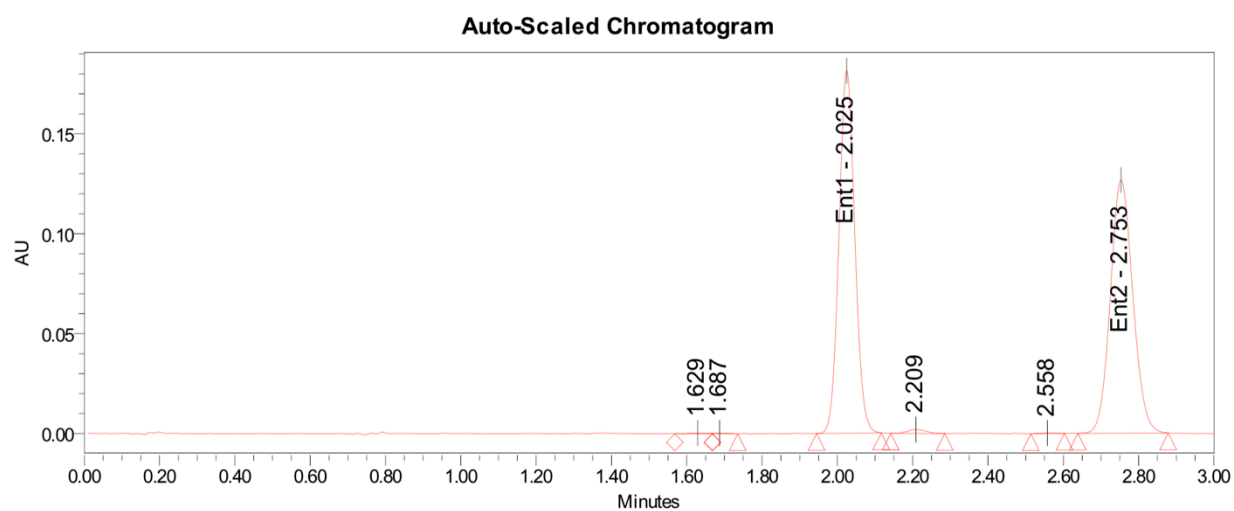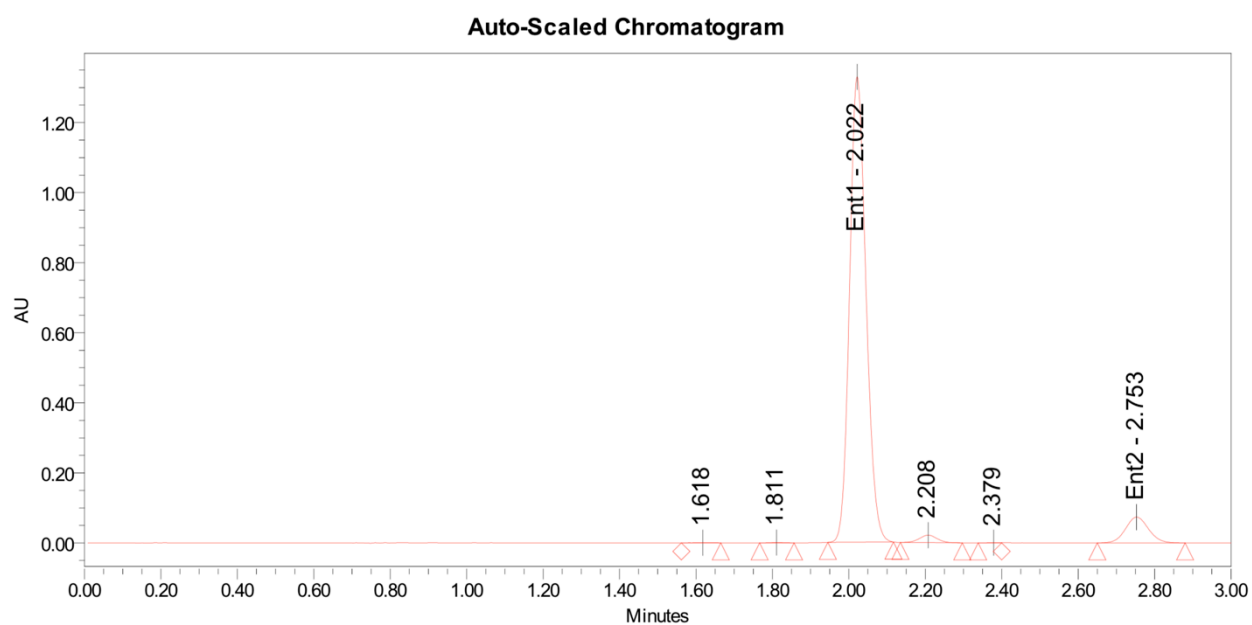

Area Summarized by Name

| SampleName    | ent1  | ent2  | ee    | Ent1    | Ent2   |
|---------------|-------|-------|-------|---------|--------|
| 1 LZ-5OMe-Rac | 50.23 | 49.77 | 0.46  | 530628  | 525733 |
| 2 LZ-37-1     | 92.81 | 7.19  | 85.62 | 3959224 | 306764 |

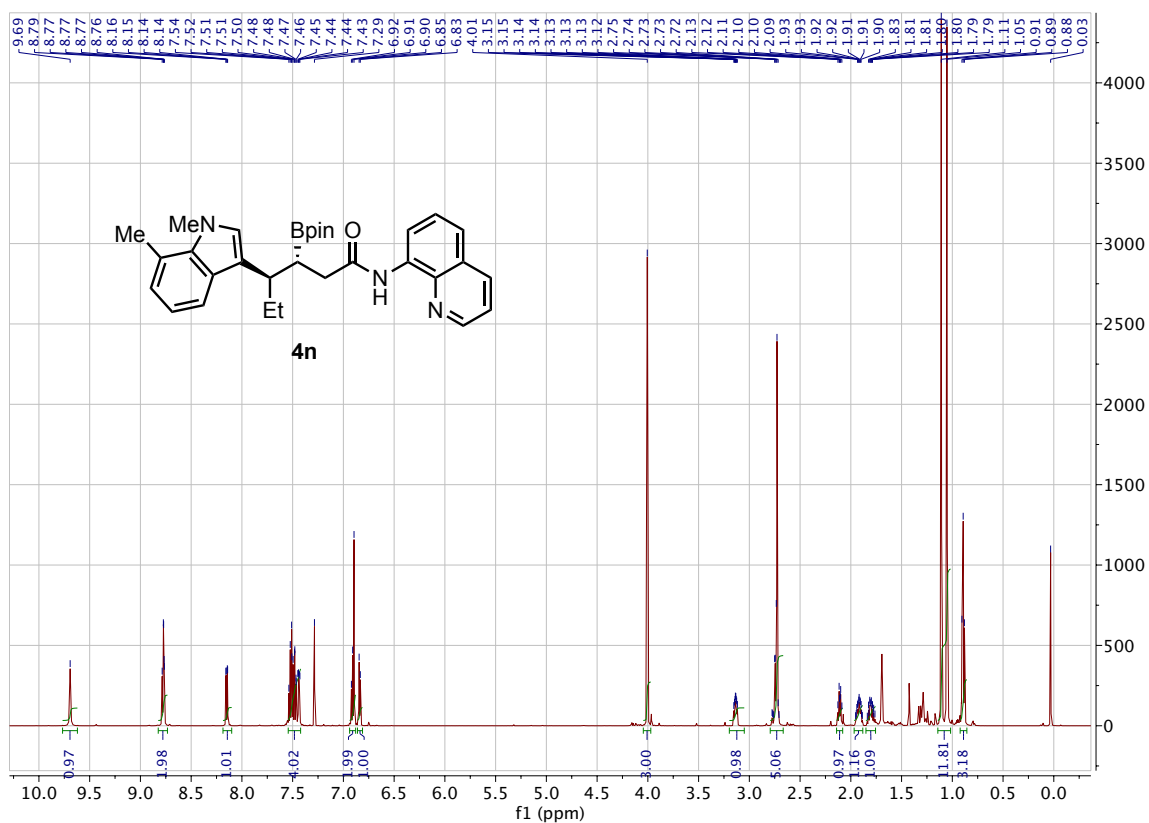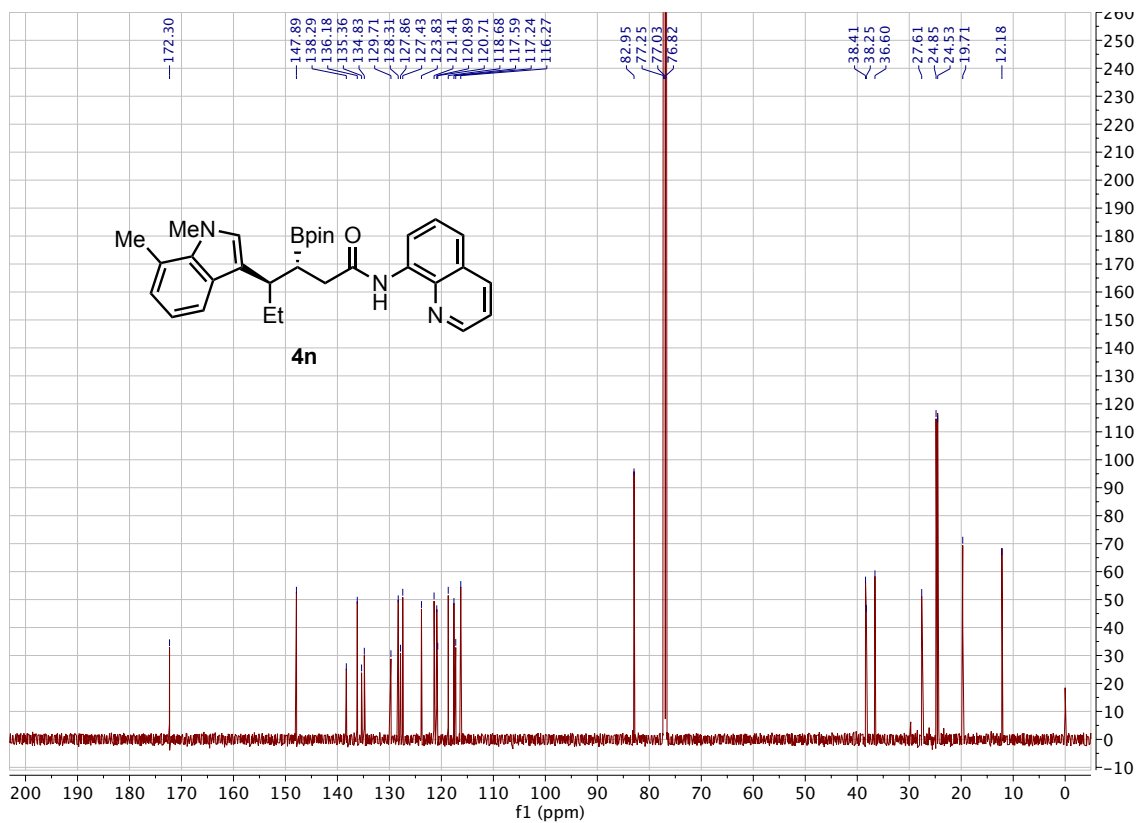

SFC Chromatograms of **4n**

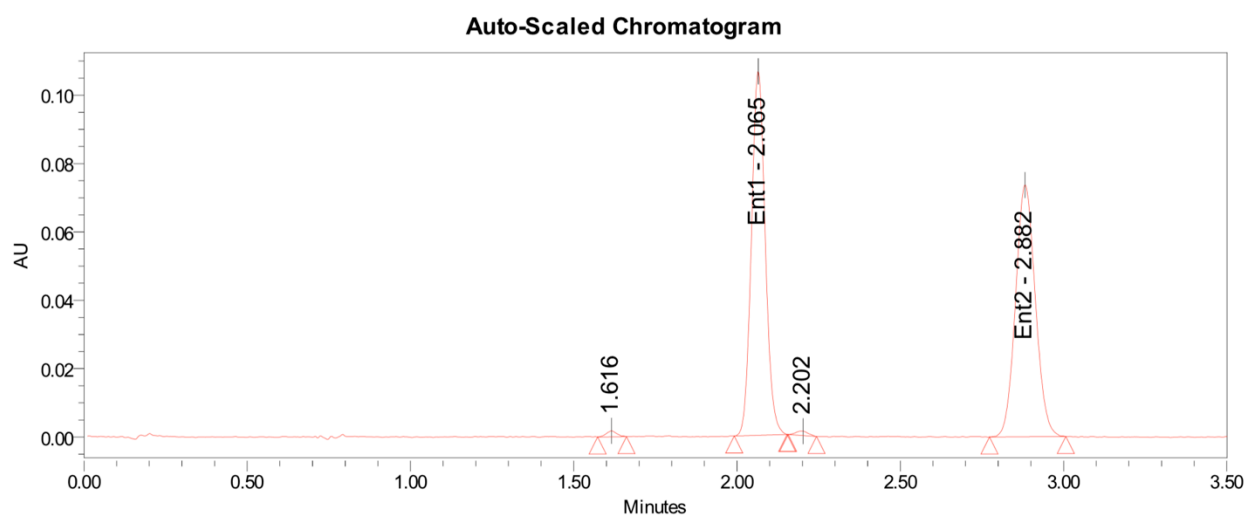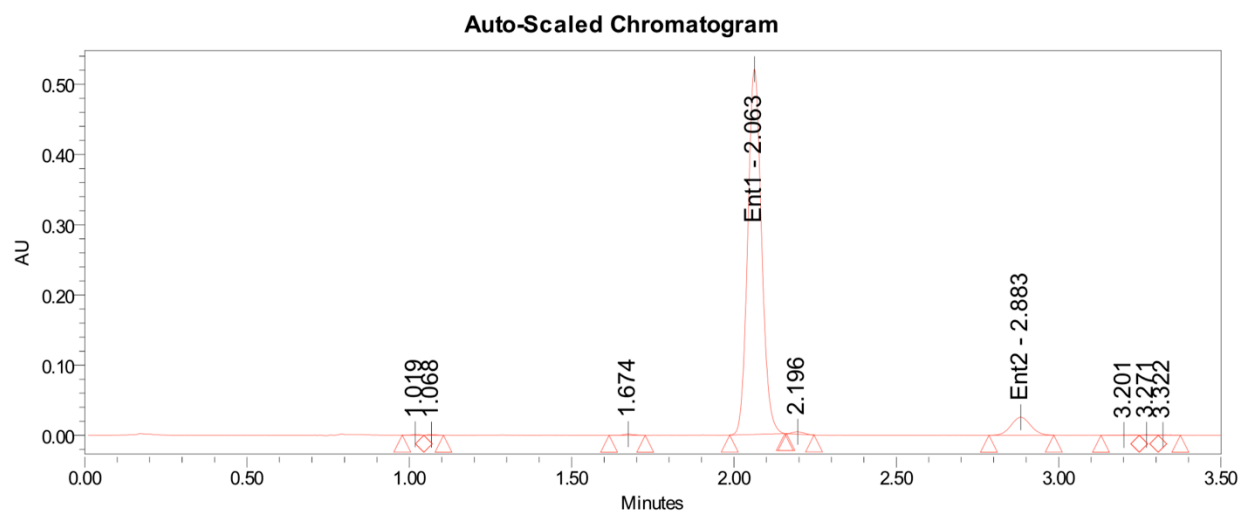

Area Summarized by Name

| SampleName   | ent1  | ent2  | ee    | Ent1    | Ent2   |
|--------------|-------|-------|-------|---------|--------|
| 1 LZ-7Me-Rac | 50.18 | 49.82 | 0.36  | 313197  | 310925 |
| 2 LZ-7Me-1   | 93.46 | 6.54  | 86.92 | 1537208 | 107576 |



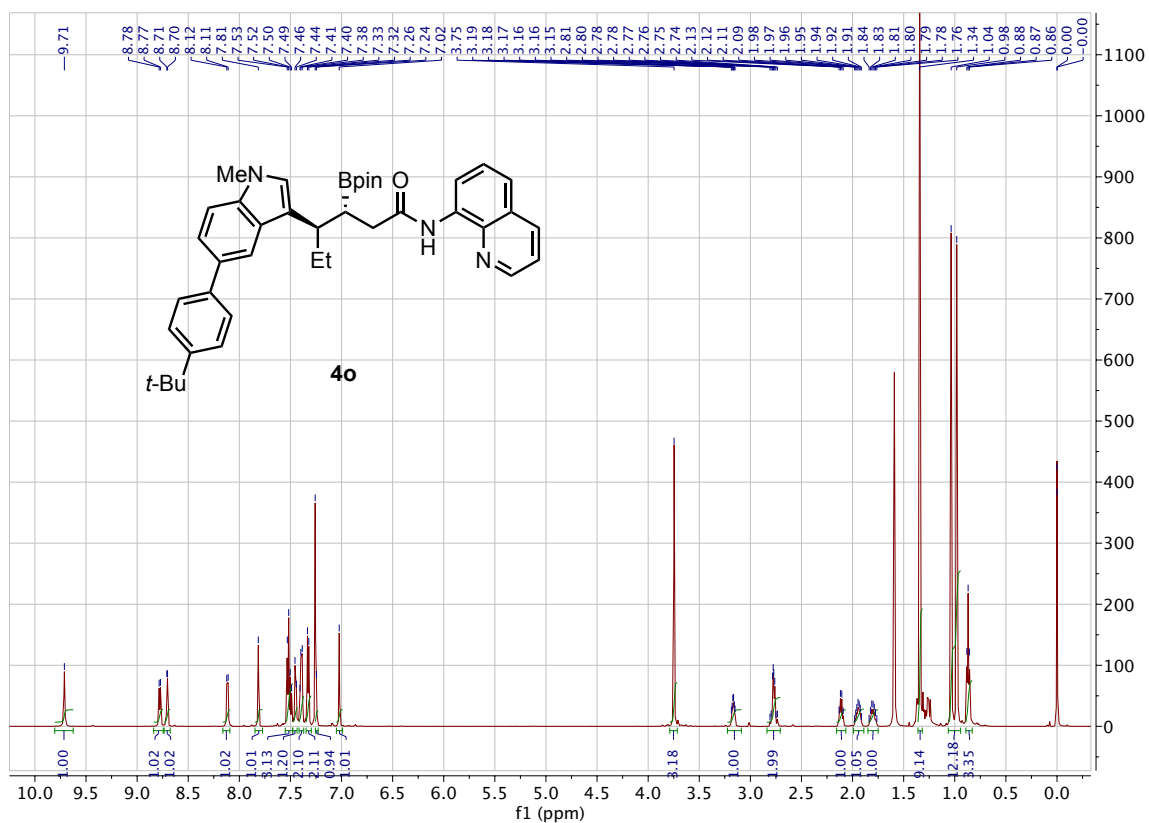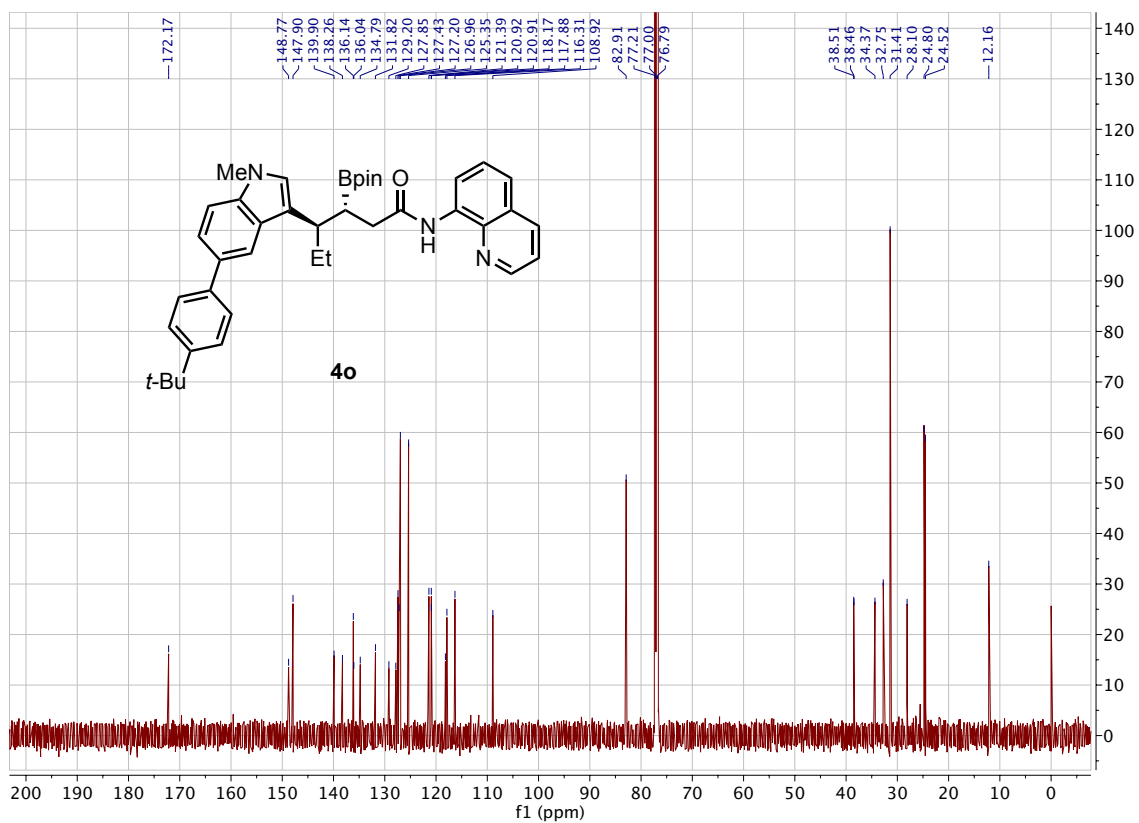

SFC Chromatograms of 4o

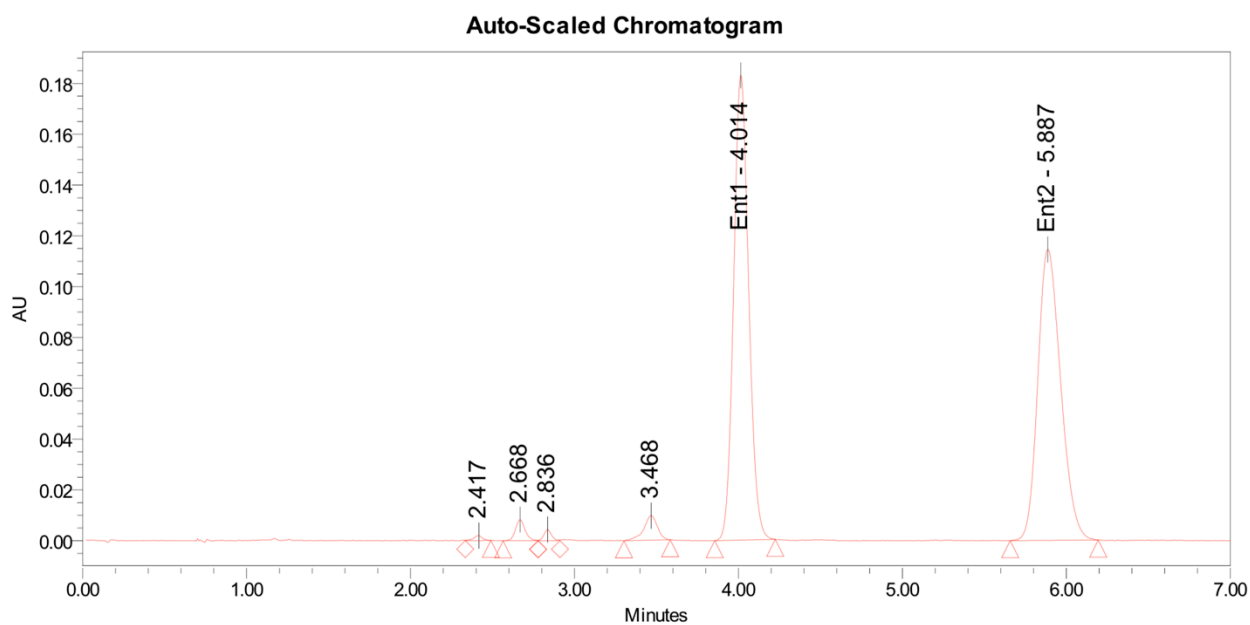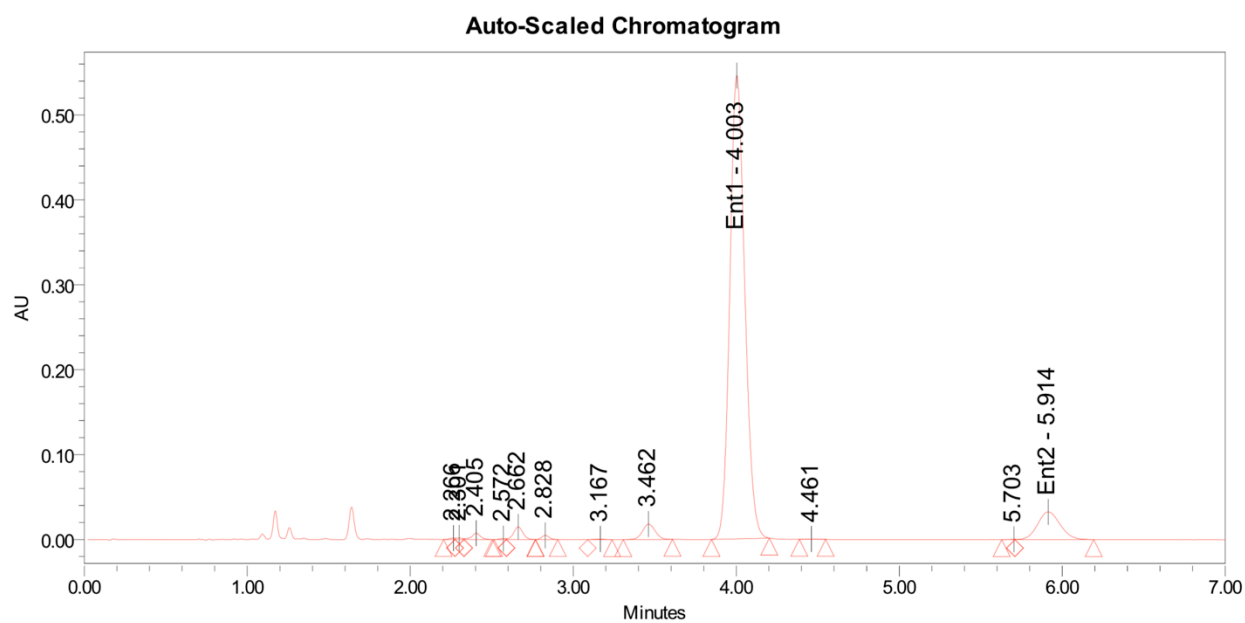

Area Summarized by Name

| SampleName | ent1  | ent2  | ee    | Ent1    | Ent2    |
|------------|-------|-------|-------|---------|---------|
| 1 LZ-42-1  | 51.11 | 48.89 | 2.22  | 1162181 | 1111601 |
| 2 LZ-43-1  | 91.67 | 8.33  | 83.34 | 3462388 | 314726  |

SFC Chromatograms of 4p

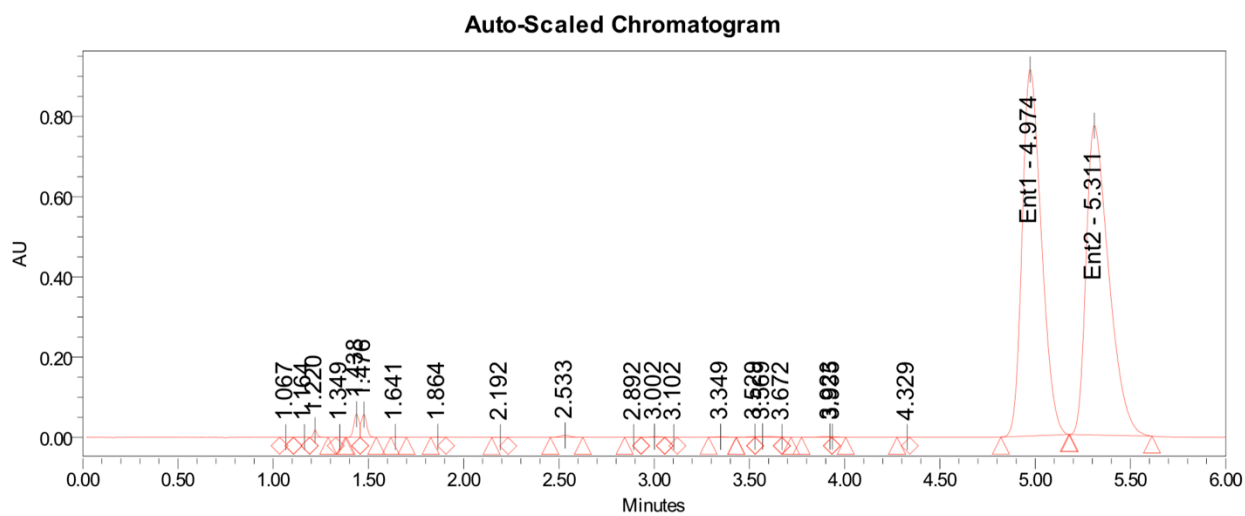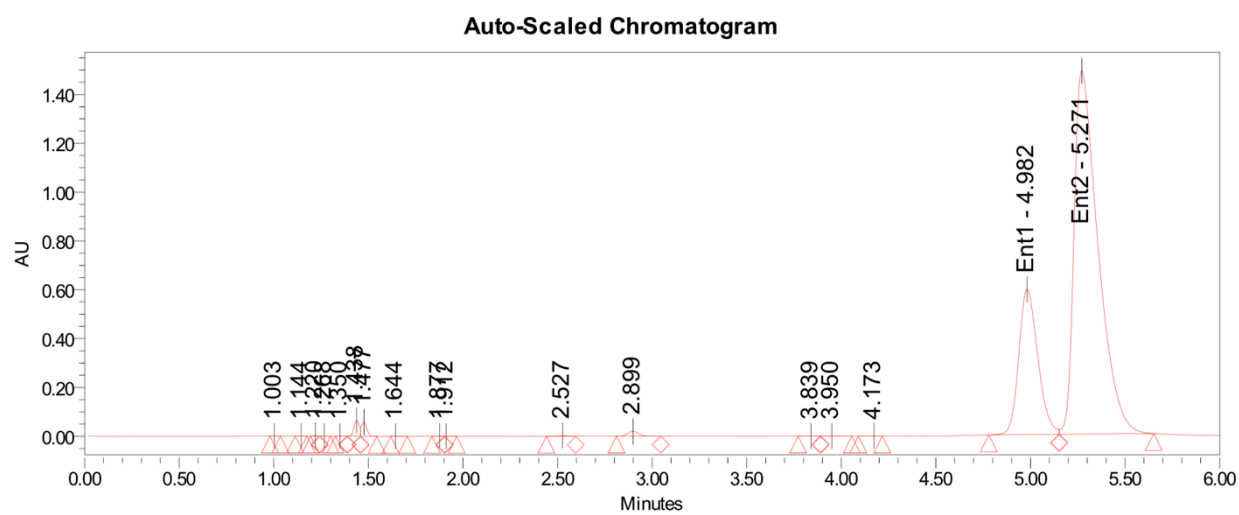

Area Summarized by Name

| SampleName | ent1  | ent2  | ee     | Ent1    | Ent2     |
|------------|-------|-------|--------|---------|----------|
| 1LZ-rac    | 50.10 | 49.90 | 0.20   | 6410665 | 6384853  |
| 2LZ-143-2  | 24.06 | 75.94 | -51.87 | 4157236 | 13119578 |

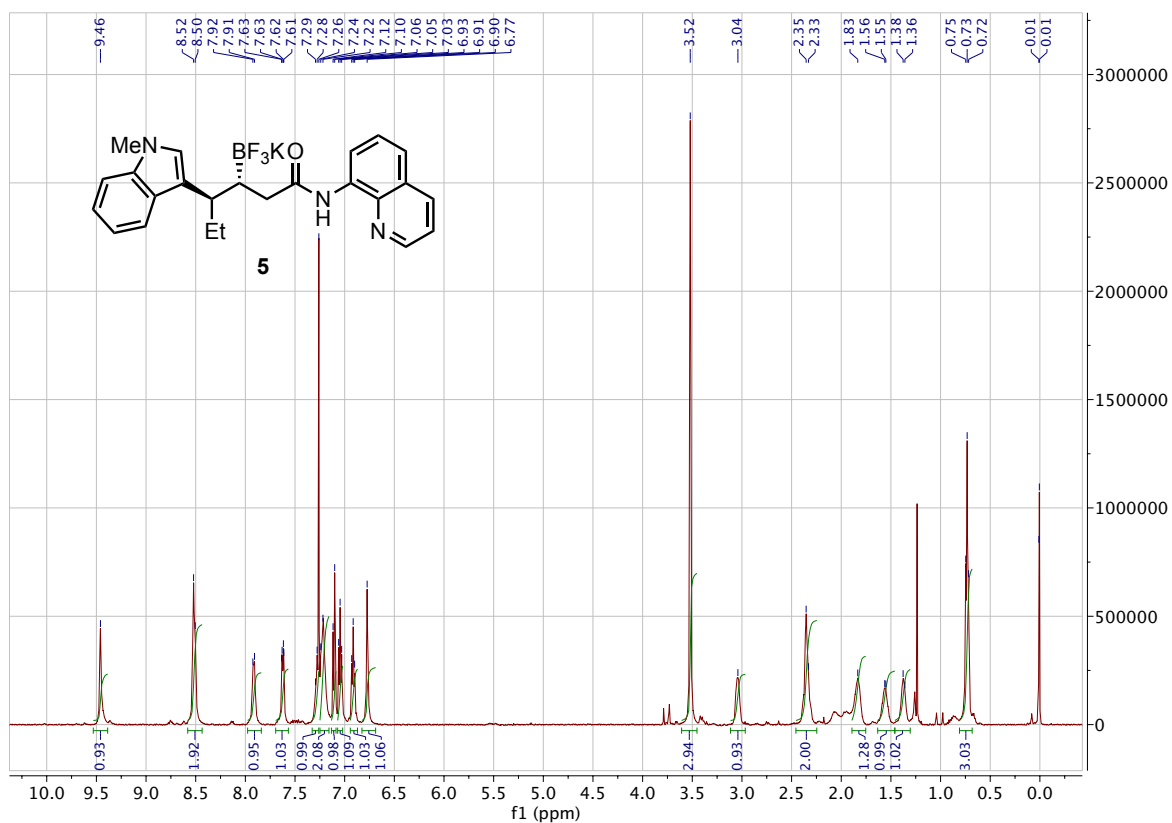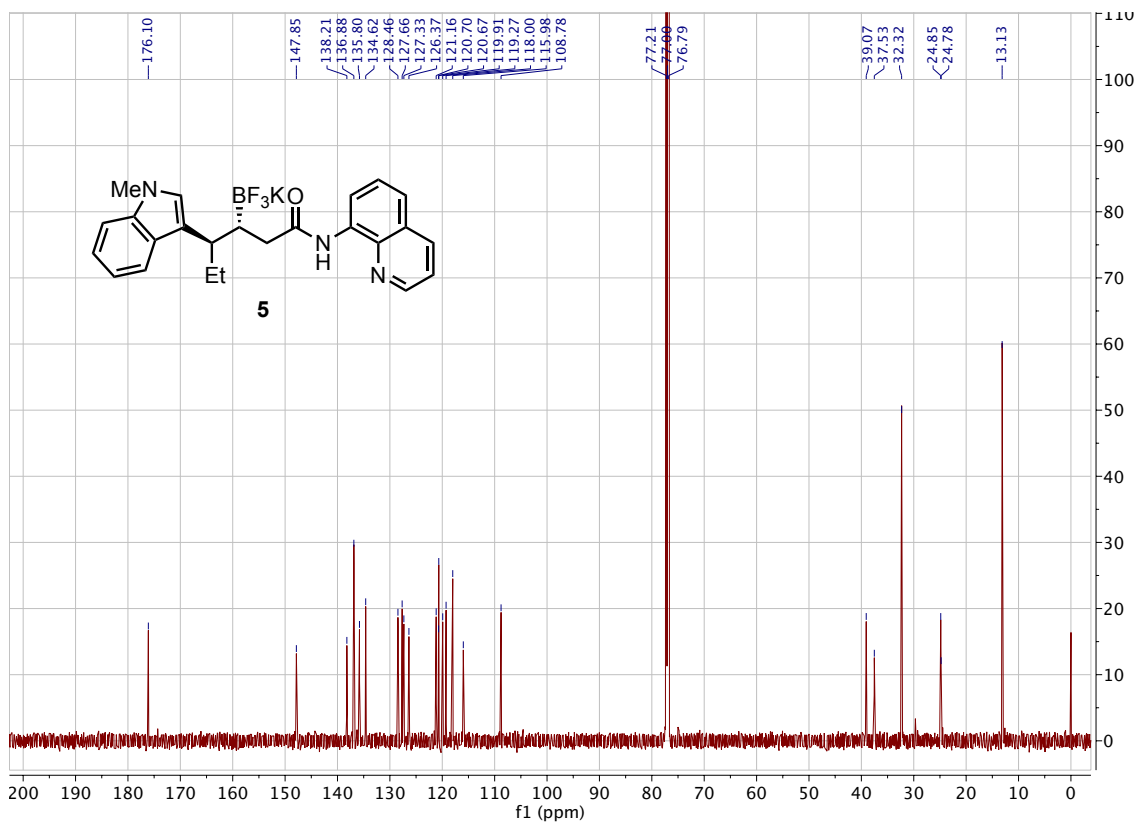

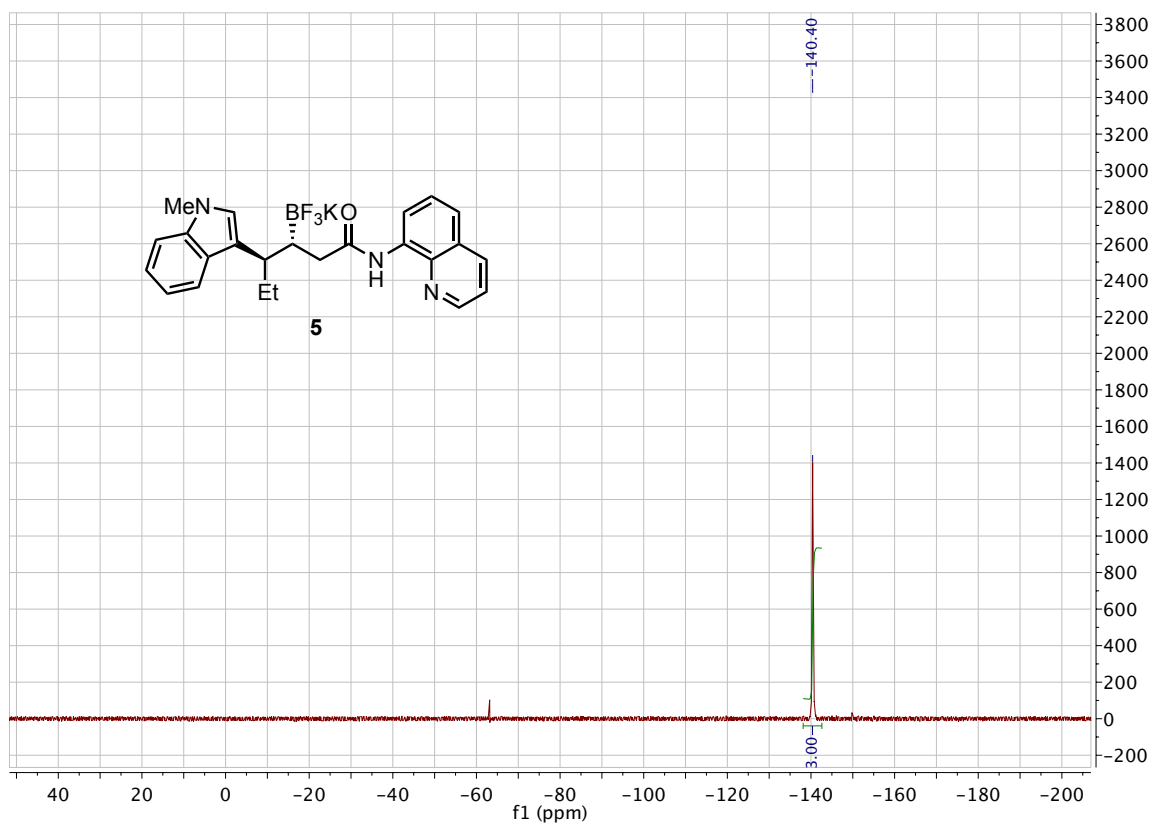

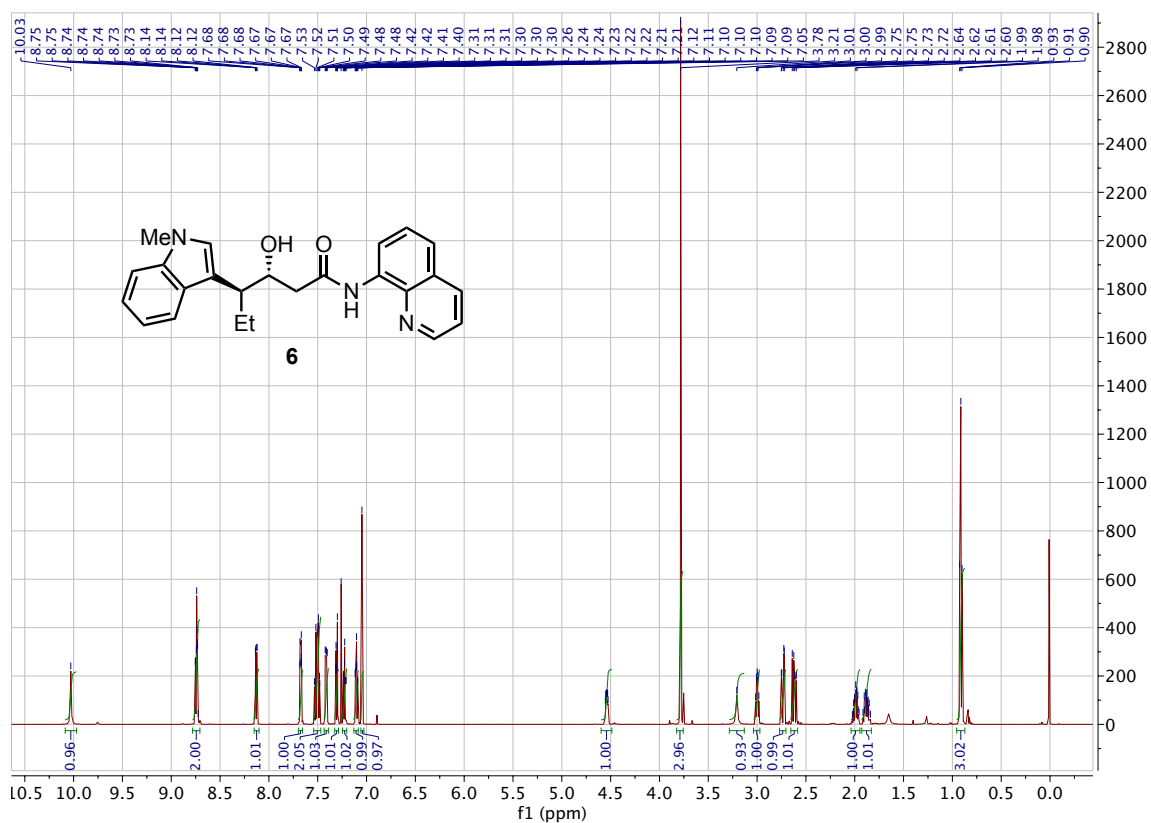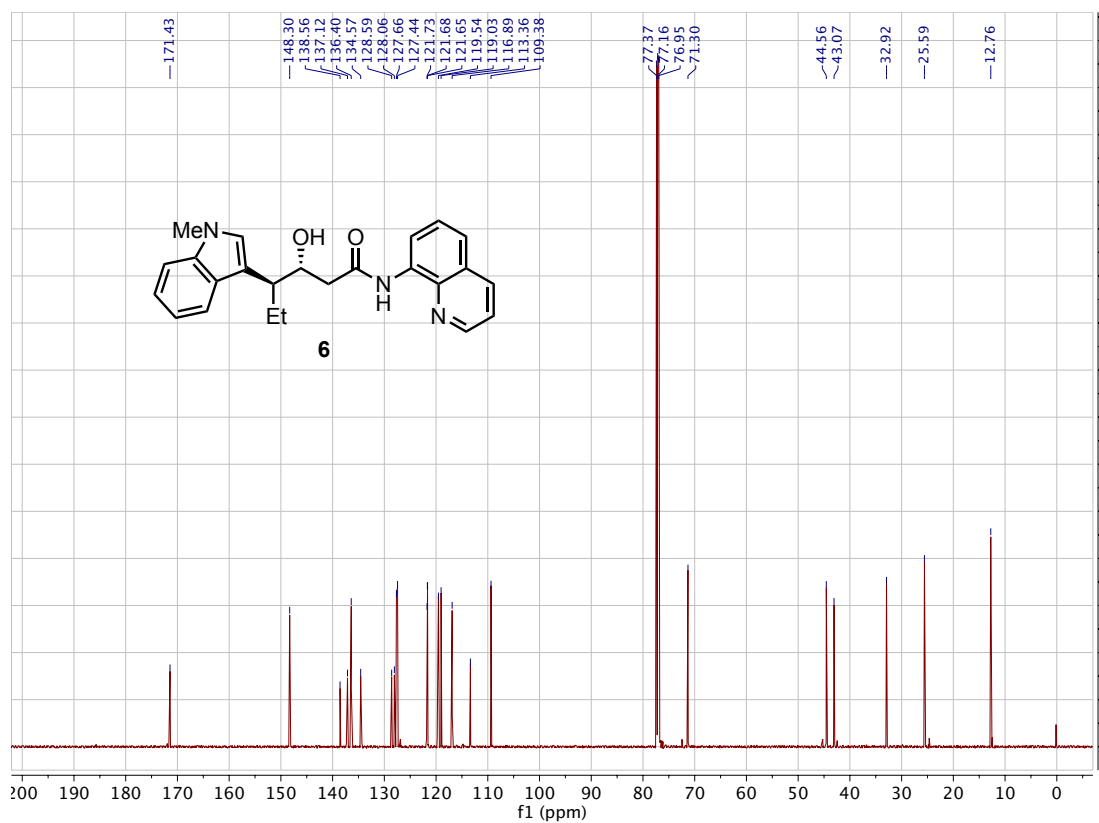

SFC Chromatograms of 6

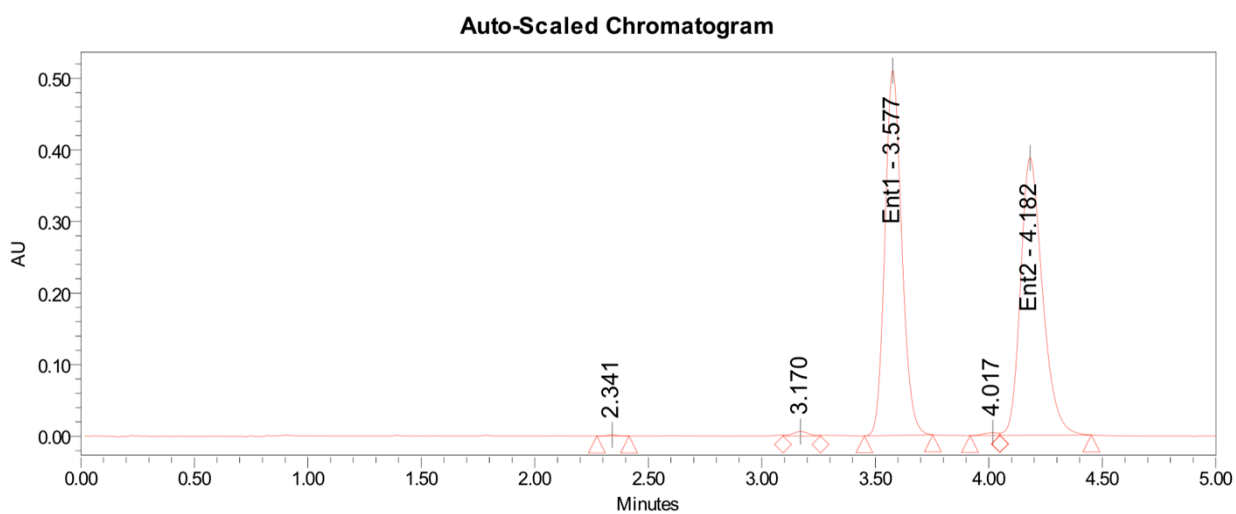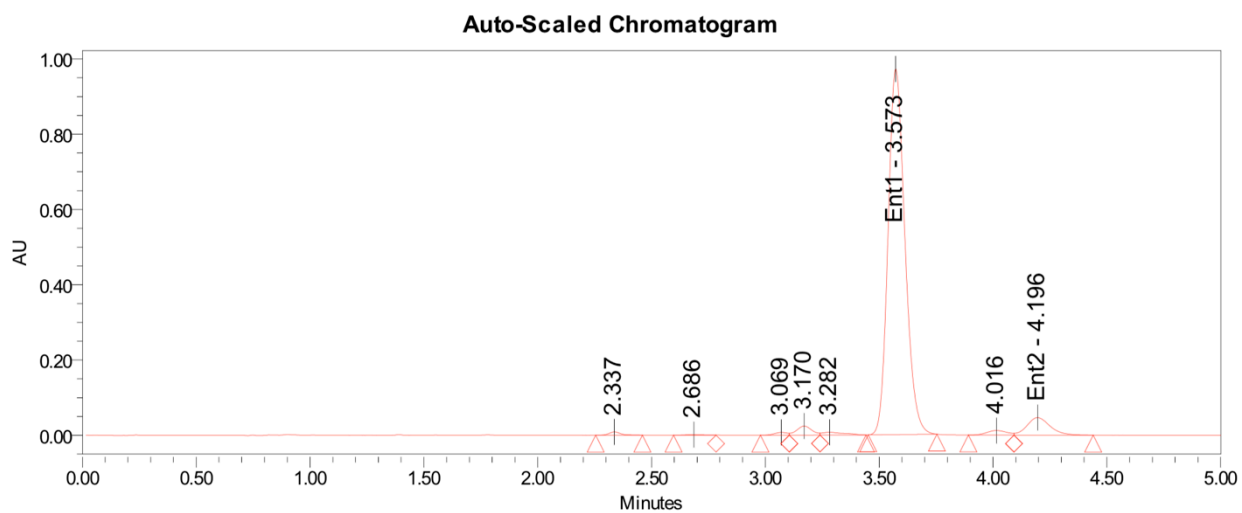

Area Summarized by Name

|   | SampleName | ent1  | ent2  | ee    | Ent1    | Ent2    |
|---|------------|-------|-------|-------|---------|---------|
| 1 | LZ-Et-O-R  | 50.10 | 49.90 | 0.20  | 2624365 | 2613891 |
| 2 | LZ-ET-O-C  | 93.89 | 6.11  | 87.77 | 5016360 | 326701  |

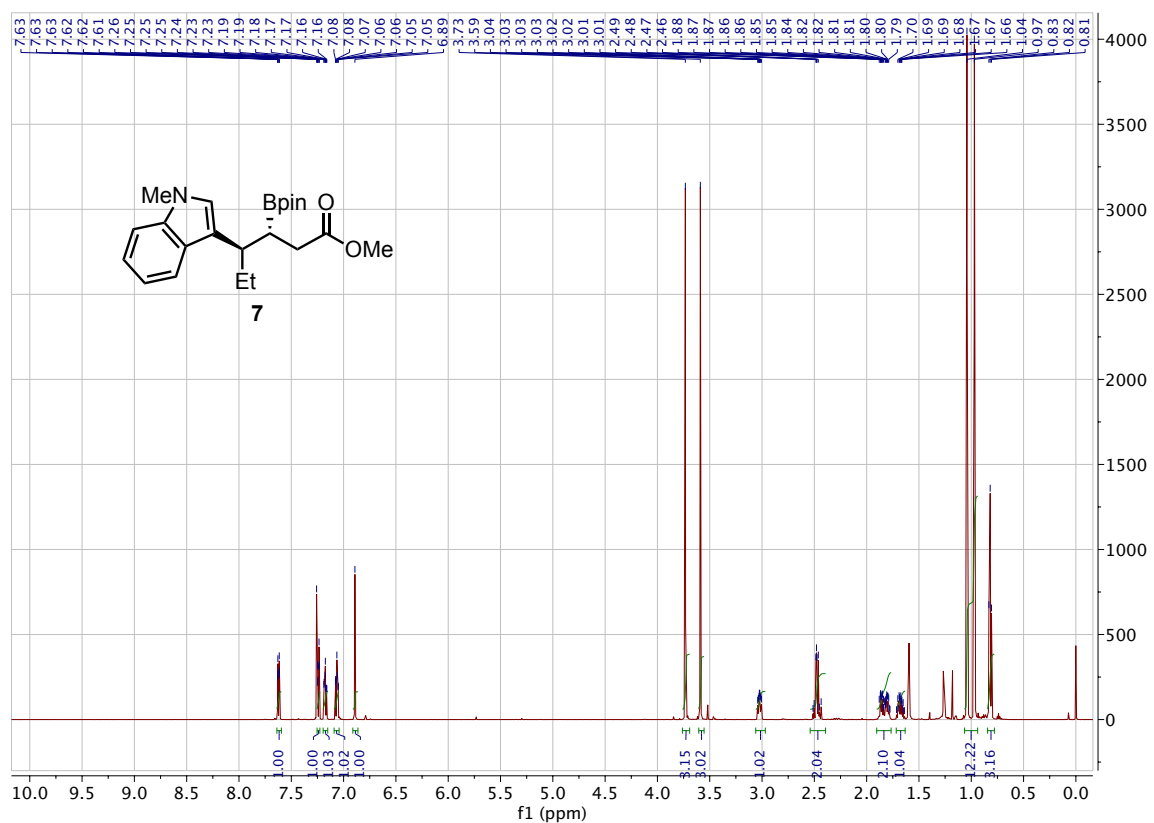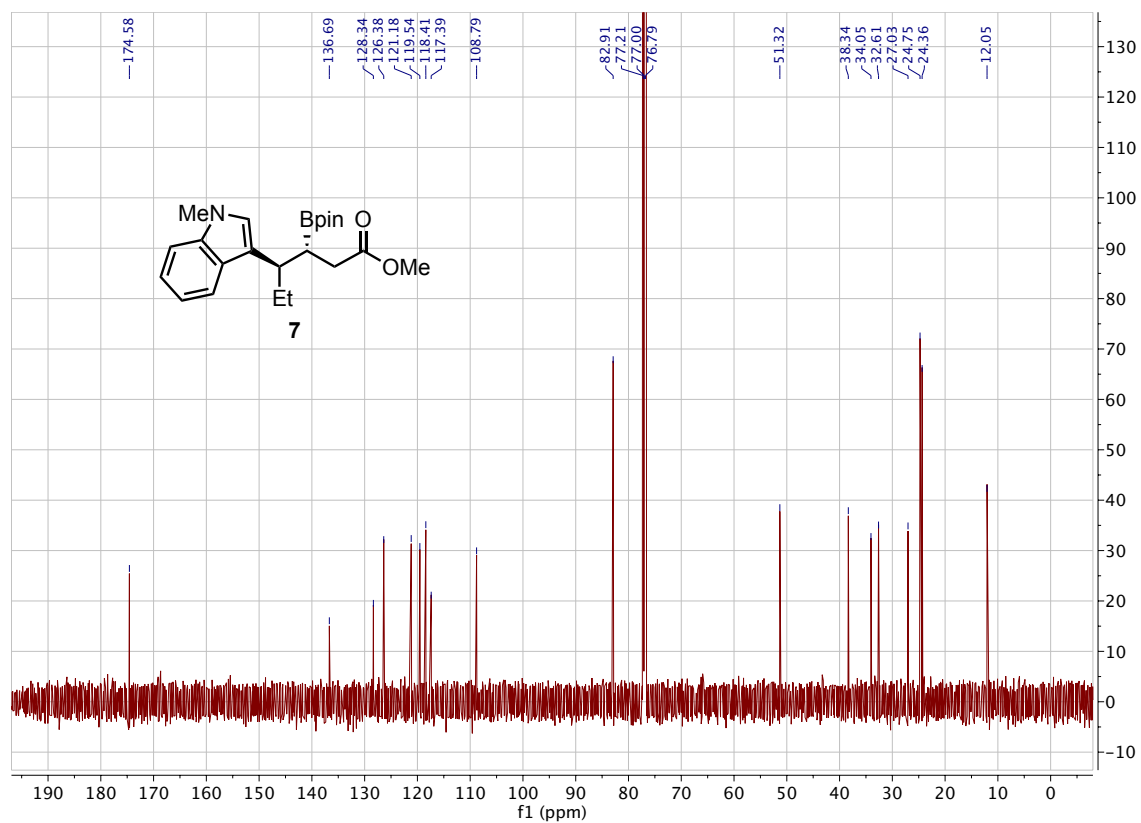



SFC Chromatograms of 7

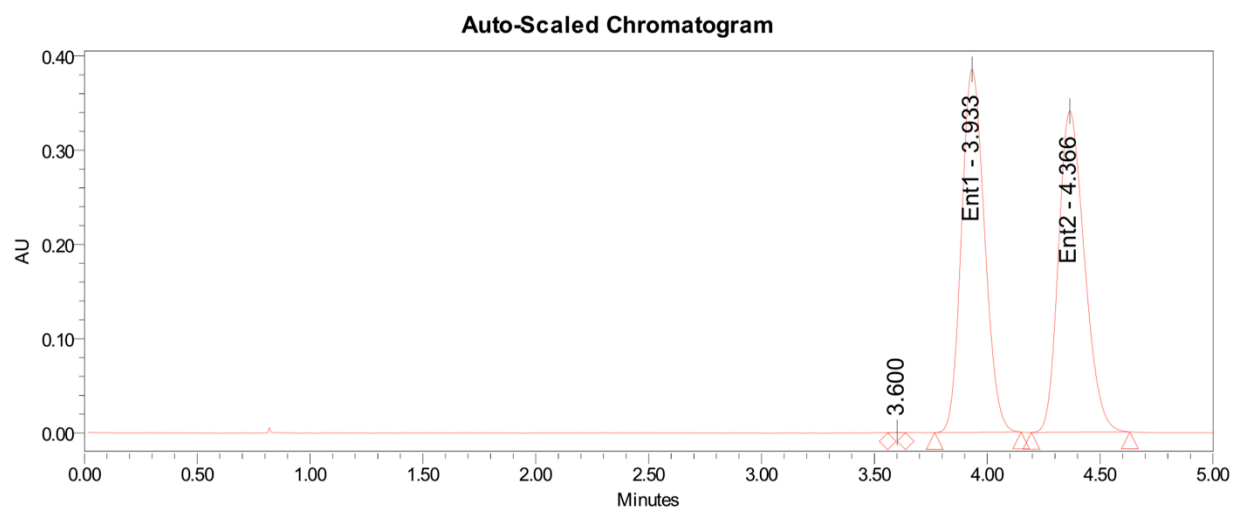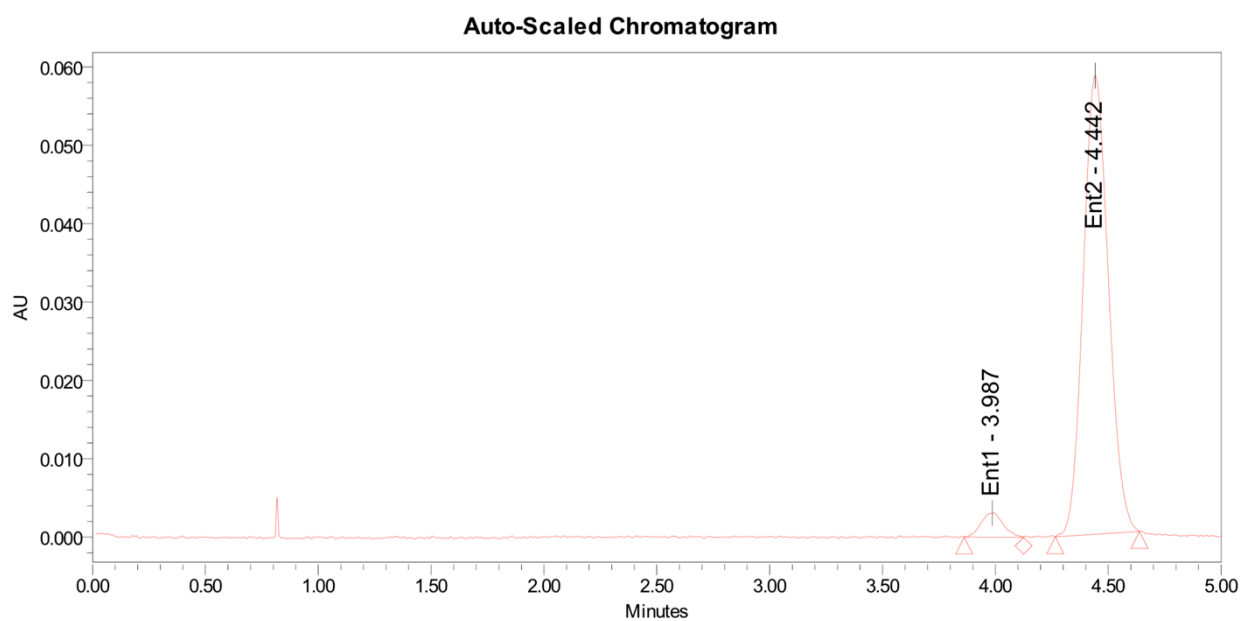

Area Summarized by Name

|   | SampleName | ent1  | ent2  | ee     | Ent1    | Ent2    |
|---|------------|-------|-------|--------|---------|---------|
| 1 | LXH-60(r)  | 50.09 | 49.91 | 0.17   | 2739668 | 2730184 |
| 2 | LXH-60(c)  | 4.45  | 95.55 | -91.10 | 21151   | 454211  |

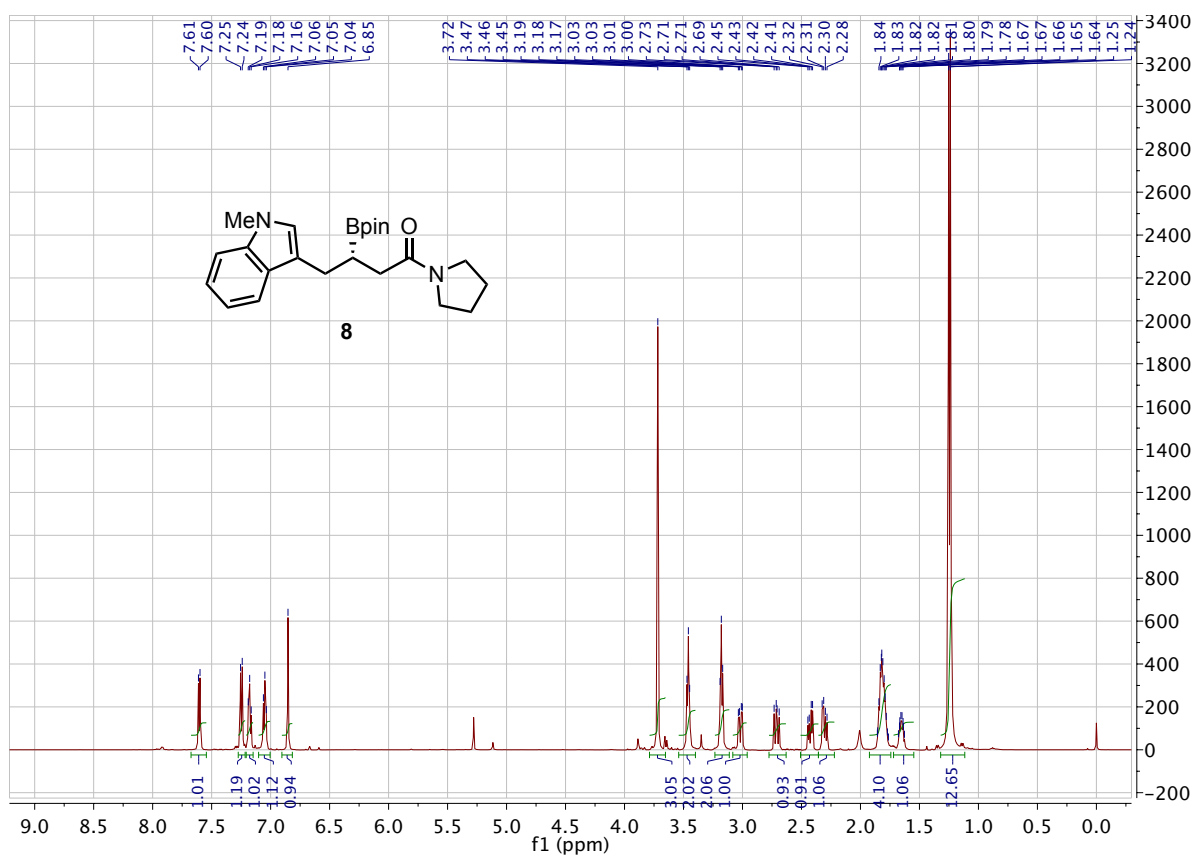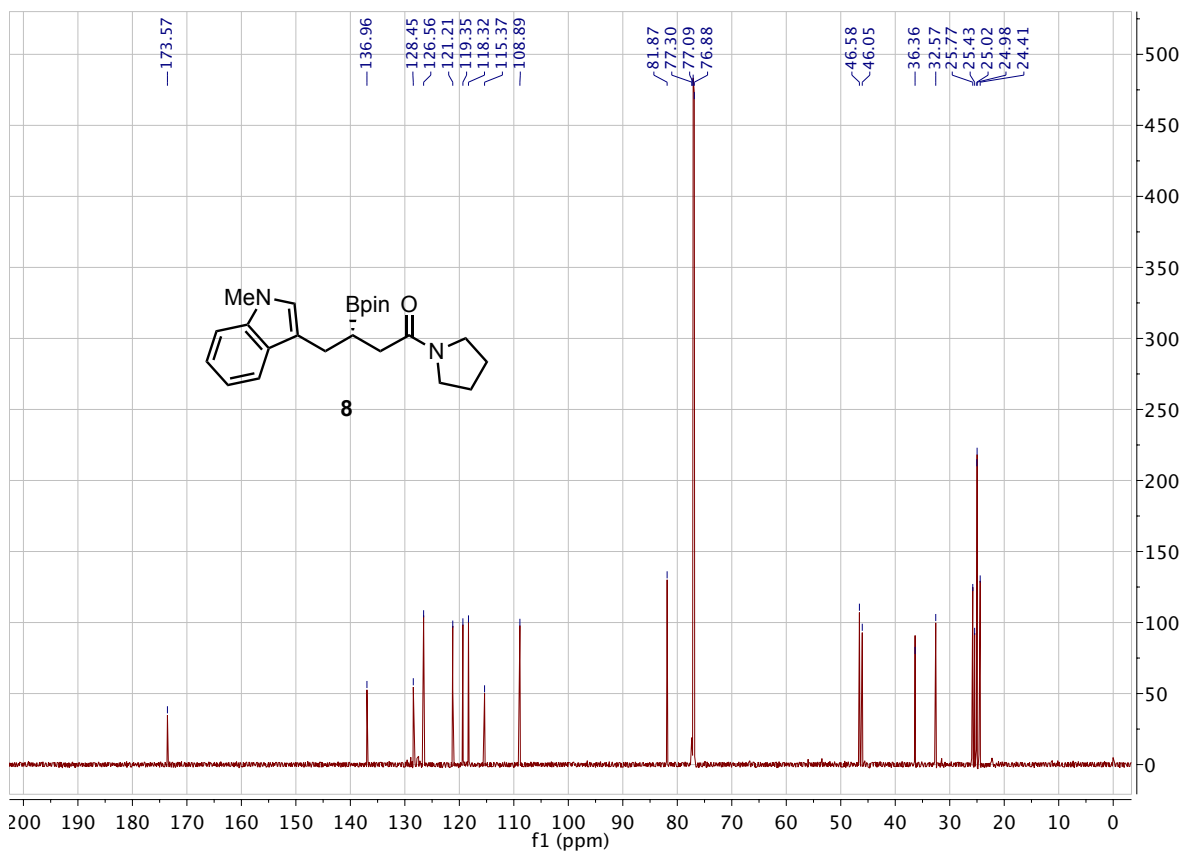

SFC Chromatograms of 8

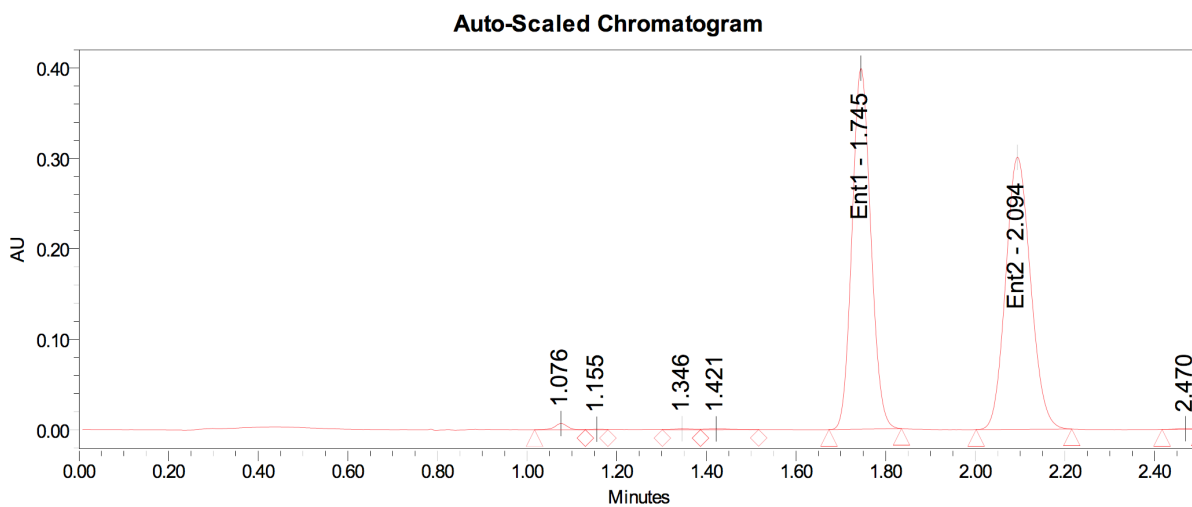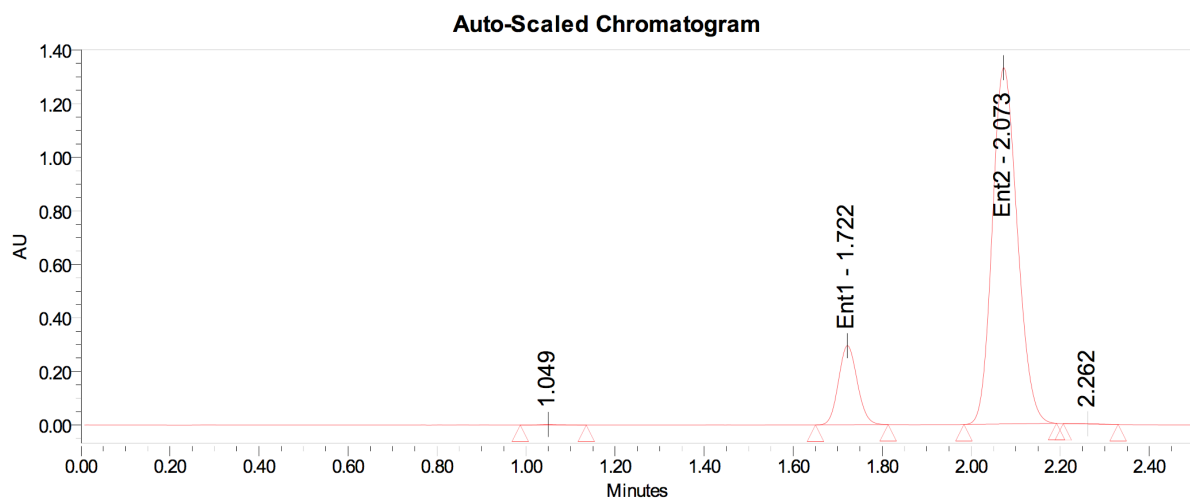

Area Summarized by Name

| SampleName | ent1  | ent2  | ee     | Ent1    | Ent2    |
|------------|-------|-------|--------|---------|---------|
| 1 ZL-AR    | 49.87 | 50.13 | -0.25  | 1159648 | 1165488 |
| 2 ZL-AC    | 14.29 | 85.71 | -71.41 | 864400  | 5182664 |

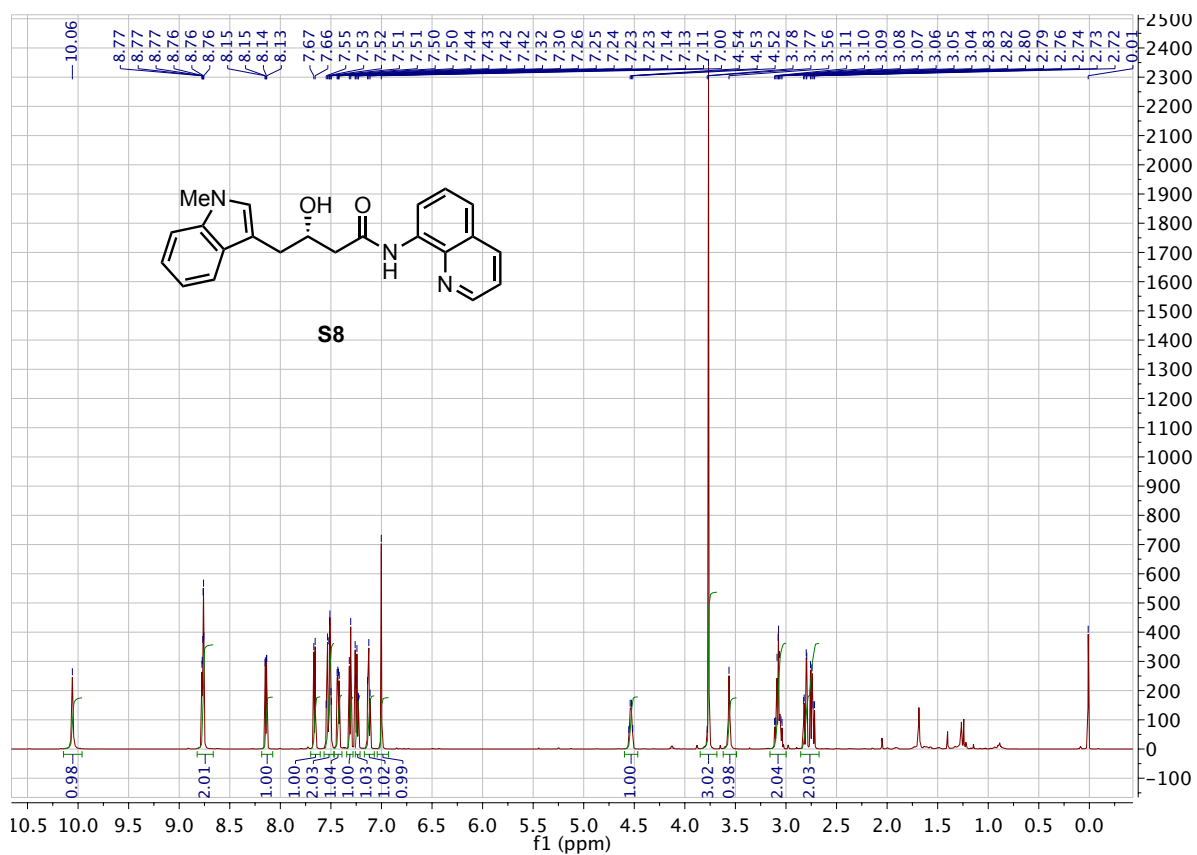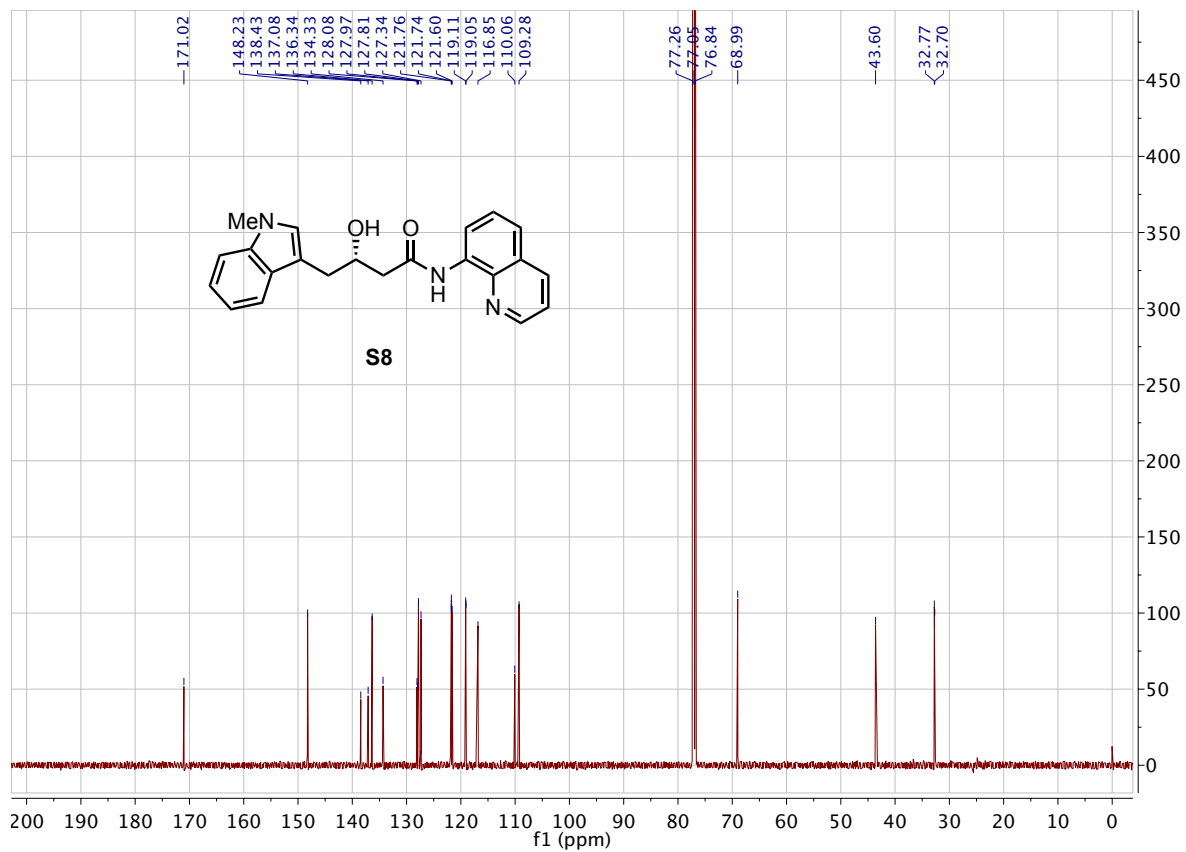

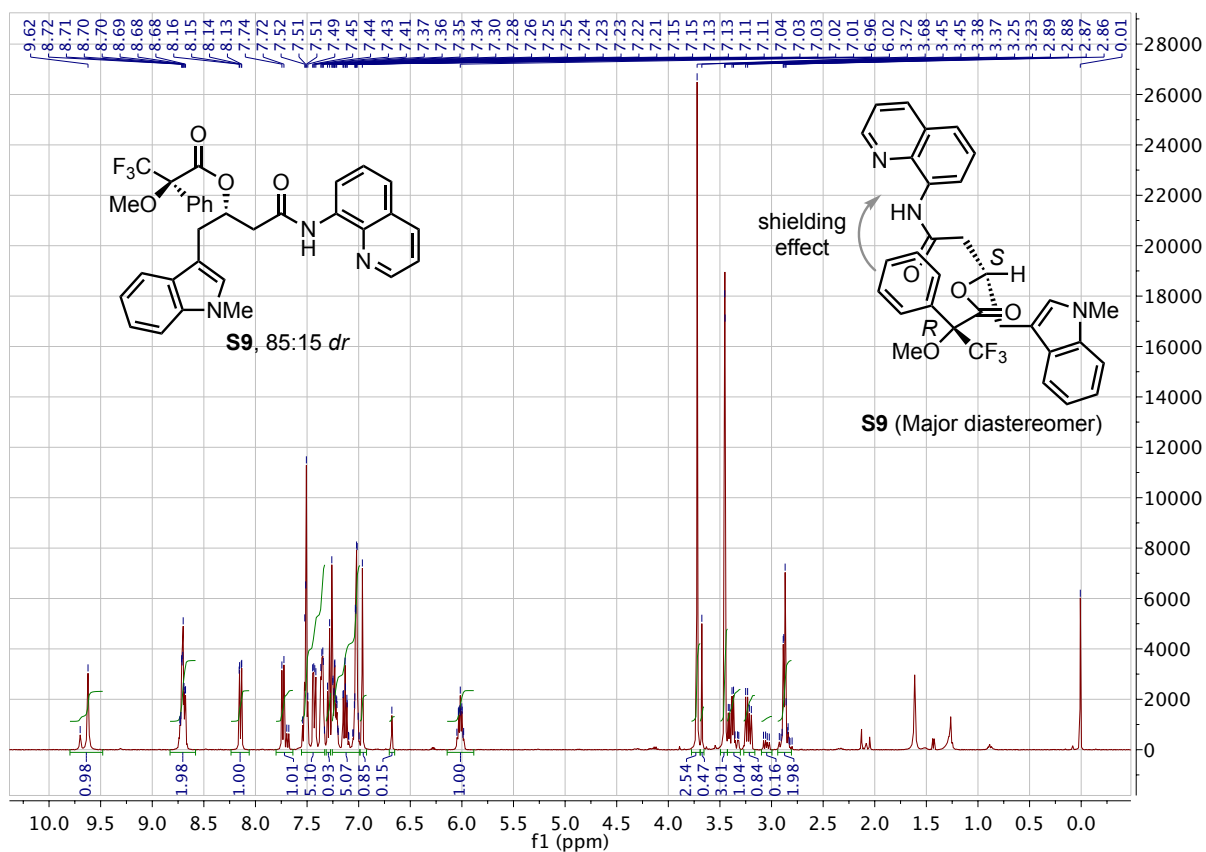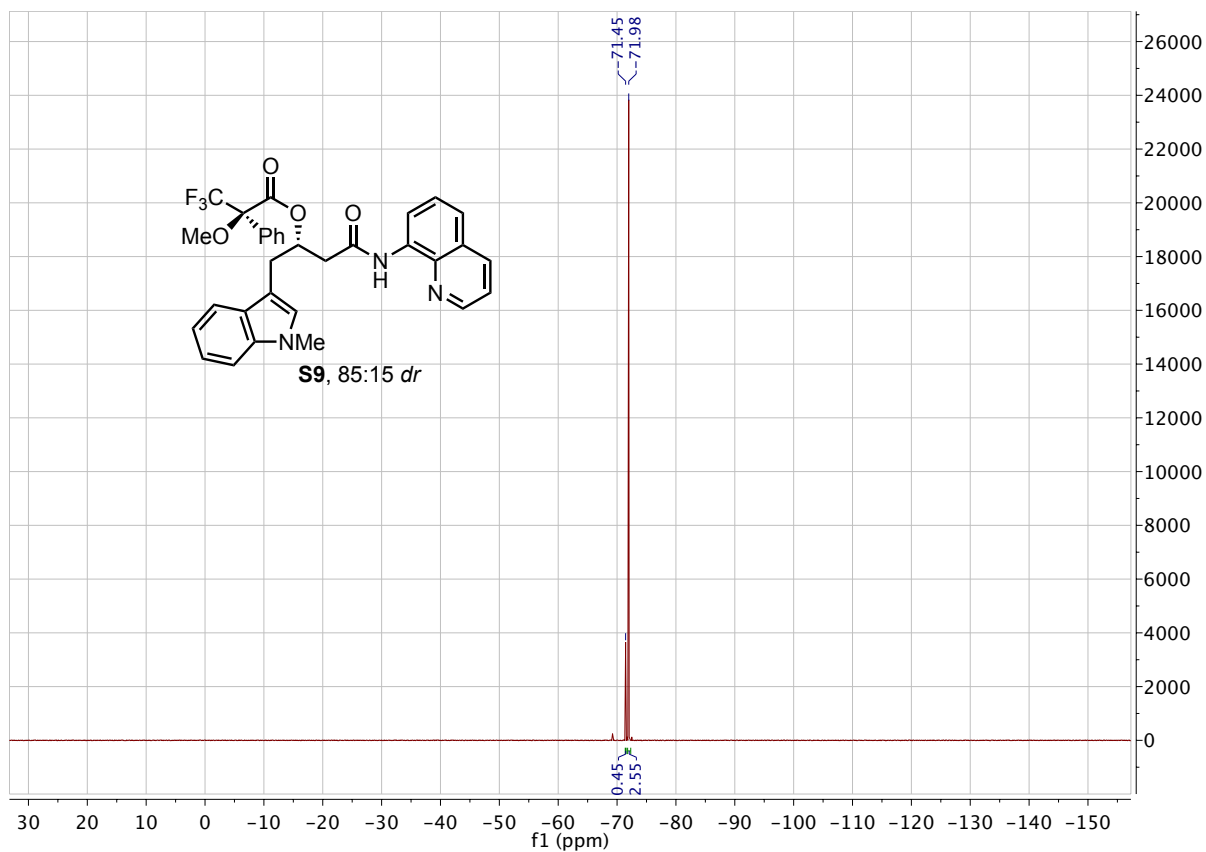

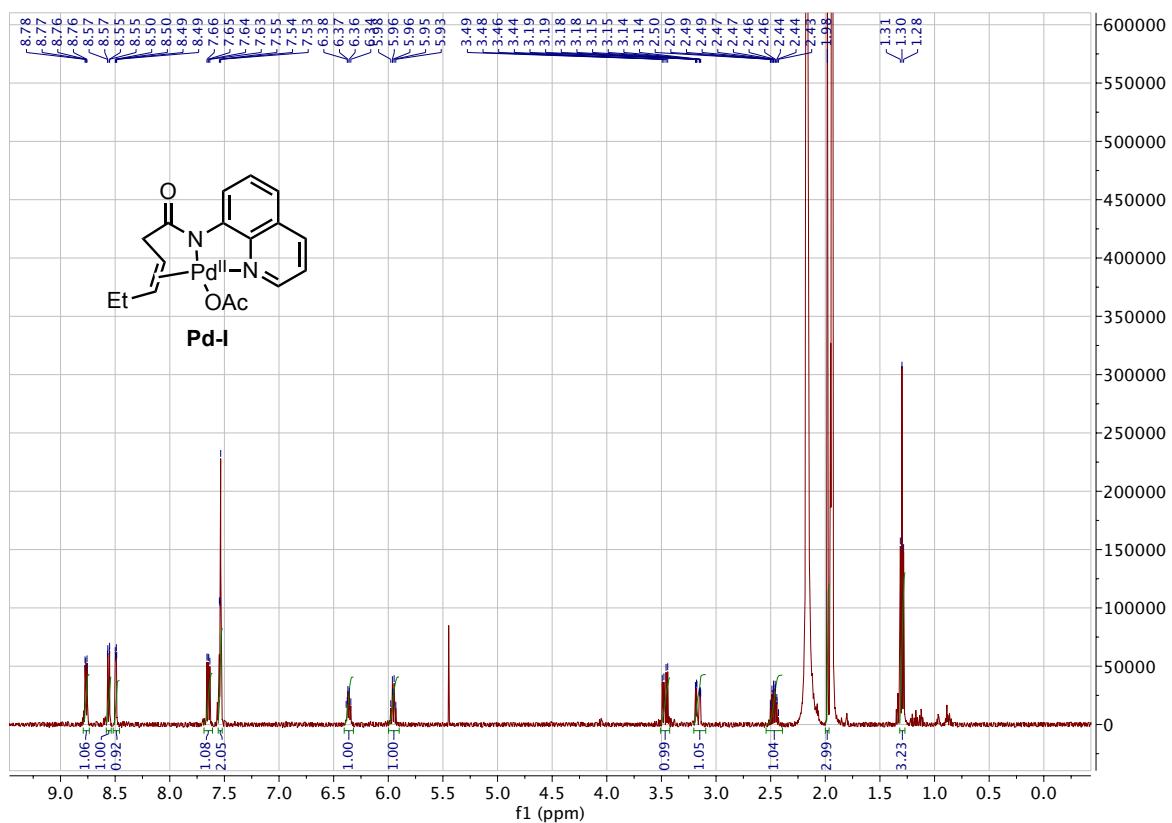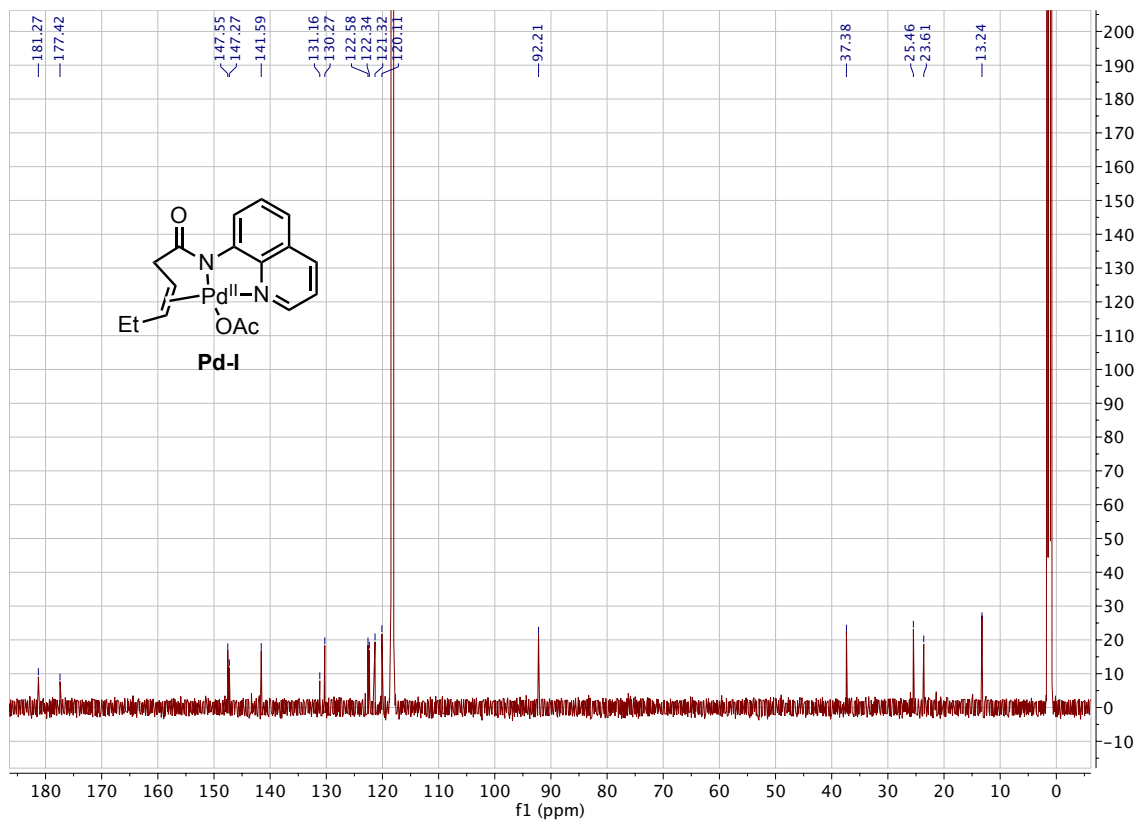

Supplement: NIHMS1023036-supplement-SI.pdf [file NIHMS1023036-supplement-SI.pdf]
